# Supplementary material for: YAP/TAZ enhances P-body formation to promote tumorigenesis
Source: eLife journal article supplement (doi:10.7554/elife.88573), 2023-08-24

Figure 1-Figure supplement 1C

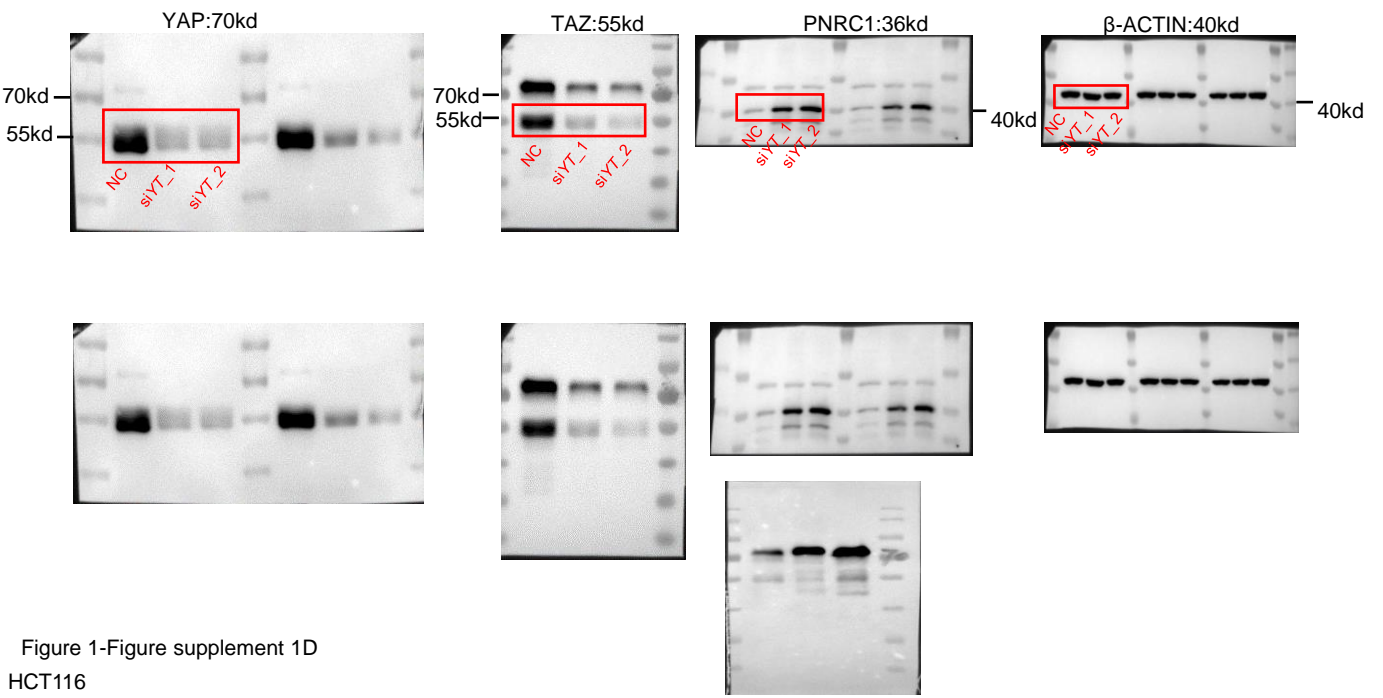

Figure 1-Figure supplement 1D

HCT116

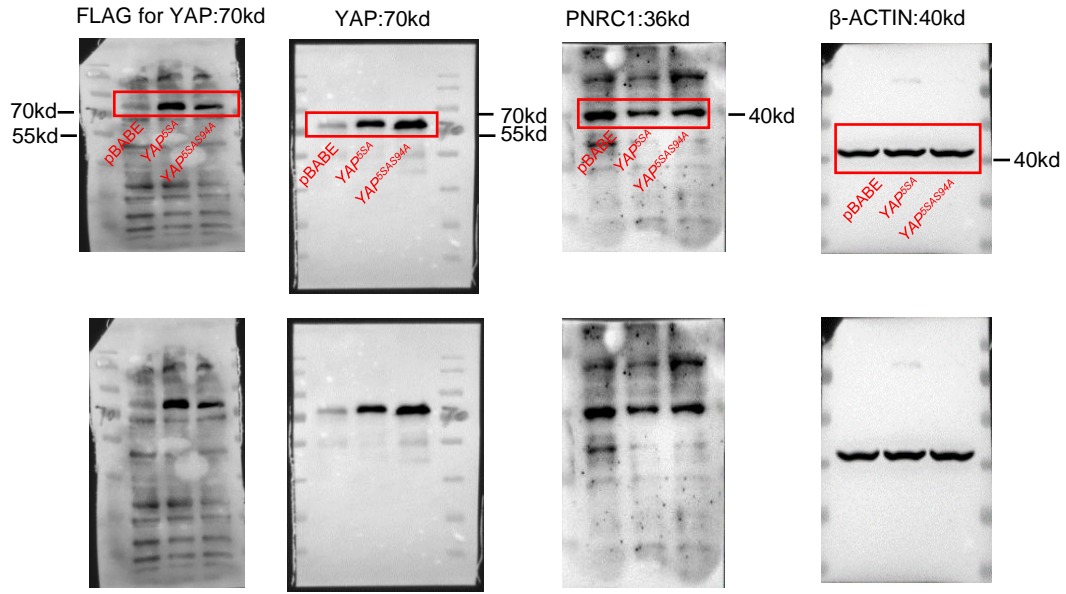

MDA-MB-231

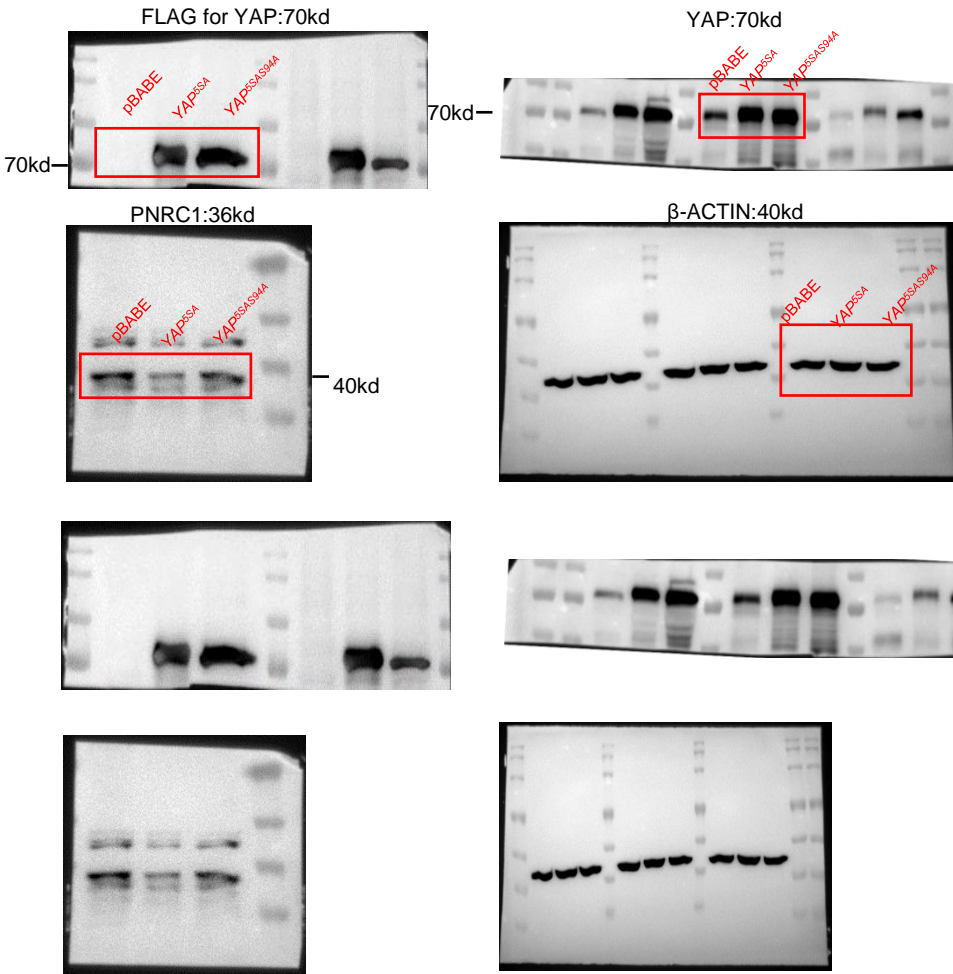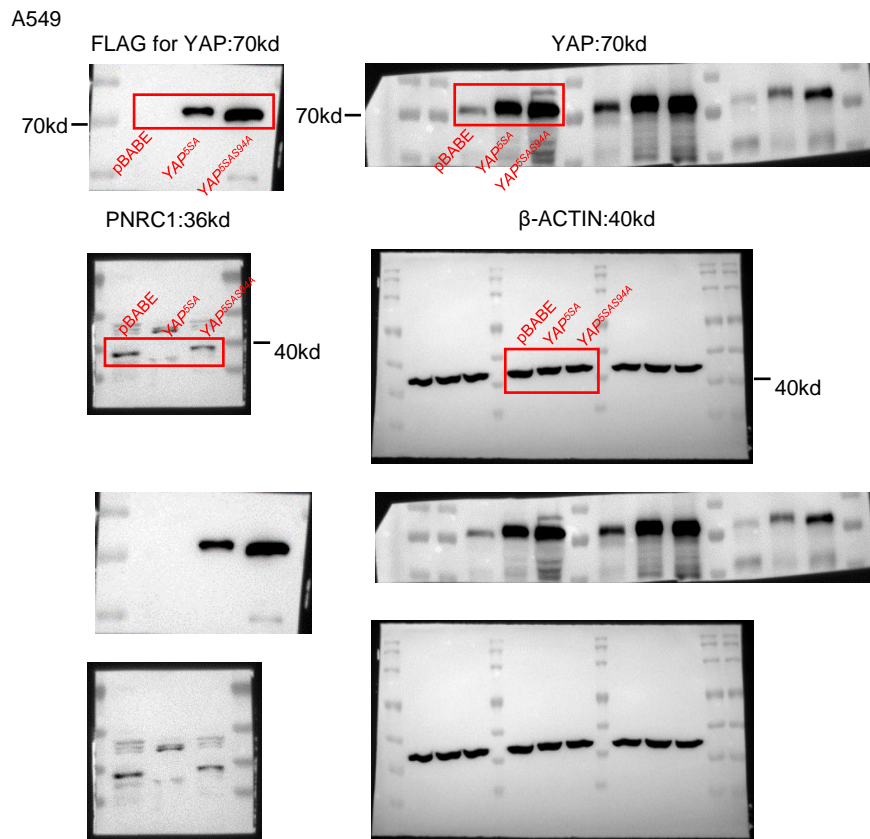

Supplement: fig1-figsupp1-data2 [file elife-88573-fig1-figsupp1-data2-v1.pdf]
