# Supplementary material for: YAP/TAZ enhances P-body formation to promote tumorigenesis
Source: eLife journal article supplement (doi:10.7554/elife.88573), 2023-08-24

Figure 7-Figure supplement 5A

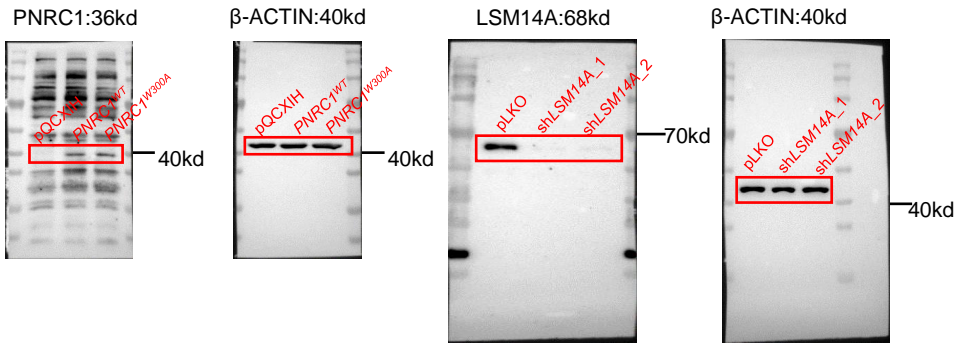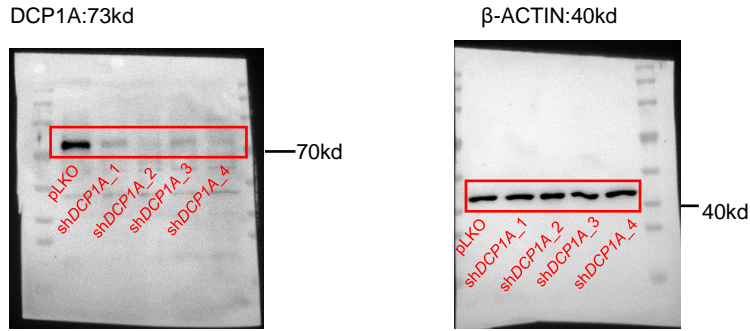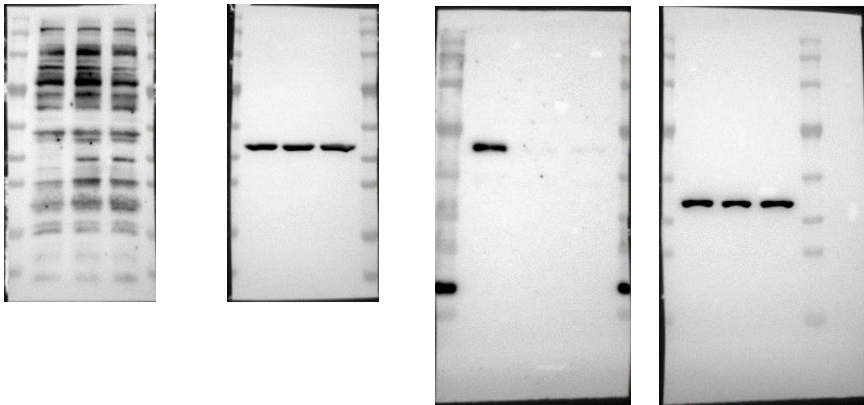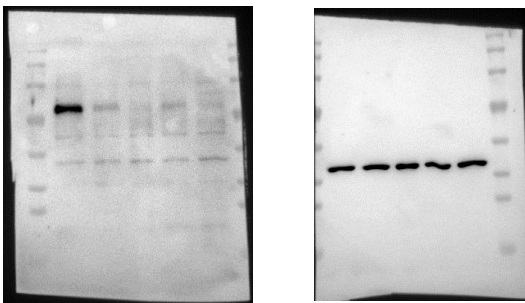

Supplement: fig7-figsupp5-data2 [file elife-88573-fig7-figsupp5-data2-v1.pdf]
