# Supplementary material for: YAP/TAZ enhances P-body formation to promote tumorigenesis
Source: eLife. 2024 Jul 24;12:RP88573. doi: 10.7554/eLife.88573 (PMC11268890; doi:10.7554/eLife.88573)
Supplement: Figure 1—source data 1. [file elife-88573-fig1-data1.xlsx]

## Sheet: Figure 1B
	IgG			TEAD4
CTGF	0.00499208	0.0104805	0.00557758	1.24303	0.982042	0.903663
		P value=0.0001
PNRC1-Intron	0.0354809	0.0174962	0.0160998	0.665812	0.743903	0.825412
		P value=0.0001
PNRC1-promoter	0.0117858	0.00408114	0.0170178	0.866451	0.670444	0.831155
		P value=0.0002
AJUBA	0.0193685	0.0110474	0.0277736	0.939429	0.945963	0.91374
		P value<0.0001
SAMD4A	0.0270766	0.00880897	0.0250888	1.20848	1.05936	1.15925
		P value<0.0001
NOCT	0.00149724	0.00102976	0.00153933	1.62059	0.880578	1.74899
		P value<0.0001
WTIP	0.00816229	0.0102601	0.00816229	0.675108	0.718564	0.698915
		P value=0.0001
Well	Fluor	Target	Content	Sample	Cq	Cq Mean	Cq Std. Dev
A01	SYBR	PNRC1 1-1	Unkn	INPUT	28.21	28.21	0		84.91	28.3033	21.6593
A02	SYBR	PNRC1 1-1	Unkn	INPUT	28.33	28.33	0		0.0354809	0.0174962	0.0160998
A03	SYBR	PNRC1 1-1	Unkn	INPUT	28.37	28.37	0		0.665812	0.743903	0.825412
A04	SYBR	PNRC1 1-1	Unkn	IGG	33.12	33.12	0
A05	SYBR	PNRC1 1-1	Unkn	IGG	34.14	34.14	0
A06	SYBR	PNRC1 1-1	Unkn	IGG	34.26	34.26	0
A07	SYBR	PNRC1 1-1	Unkn	TEAD4	28.89	28.89	0
A08	SYBR	PNRC1 1-1	Unkn	TEAD4	28.73	28.73	0
A09	SYBR	PNRC1 1-1	Unkn	TEAD4	28.58	28.58	0
A10	SYBR		Unkn		N/A	0	0
A11	SYBR		Unkn		N/A	0	0
A12	SYBR		Unkn		N/A	0	0
B01	SYBR	PNRC1 1-2	Unkn	INPUT	28.21	28.21	0		84.46	28.1533	21.5093
B02	SYBR	PNRC1 1-2	Unkn	INPUT	28.13	28.13	0		0.0117858	0.00408114	0.0170178
B03	SYBR	PNRC1 1-2	Unkn	INPUT	28.12	28.12	0		0.866451	0.670444	0.831155
B04	SYBR	PNRC1 1-2	Unkn	IGG	34.56	34.56	0
B05	SYBR	PNRC1 1-2	Unkn	IGG	36.09	36.09	0
B06	SYBR	PNRC1 1-2	Unkn	IGG	34.03	34.03	0
B07	SYBR	PNRC1 1-2	Unkn	TEAD4	28.36	28.36	0
B08	SYBR	PNRC1 1-2	Unkn	TEAD4	28.73	28.73	0
B09	SYBR	PNRC1 1-2	Unkn	TEAD4	28.42	28.42	0
B10	SYBR		Unkn		N/A	0	0
B11	SYBR		Unkn		N/A	0	0
B12	SYBR		Unkn		N/A	0	0
C01	SYBR	PNRC1 900	Unkn	INPUT	29.5	29.5	0
C02	SYBR	PNRC1 900	Unkn	INPUT	29.32	29.32	0
C03	SYBR	PNRC1 900	Unkn	INPUT	29.39	29.39	0
C04	SYBR	PNRC1 900	Unkn	IGG	34.08	34.08	0
C05	SYBR	PNRC1 900	Unkn	IGG	33.94	33.94	0
C06	SYBR	PNRC1 900	Unkn	IGG	34.02	34.02	0
C07	SYBR	PNRC1 900	Unkn	TEAD4	30.05	30.05	0
C08	SYBR	PNRC1 900	Unkn	TEAD4	30.12	30.12	0
C09	SYBR	PNRC1 900	Unkn	TEAD4	30.48	30.48	0
C10	SYBR		Unkn		N/A	0	0
C11	SYBR		Unkn		N/A	0	0
C12	SYBR		Unkn		N/A	0	0
D01	SYBR	CTGF	Unkn	INPUT	31.3	31.3	0			24.79
D02	SYBR	CTGF	Unkn	INPUT	31.66	31.66	0			0.00499208	0.0104805	0.00557758
D03	SYBR	CTGF	Unkn	INPUT	31.37	31.37	0			1.24303	0.982042	0.903663
D04	SYBR	CTGF	Unkn	IGG	38.92	38.92	0
D05	SYBR	CTGF	Unkn	IGG	39.08	39.08	0
D06	SYBR	CTGF	Unkn	IGG	38.01	38.01	0
D07	SYBR	CTGF	Unkn	TEAD4	31.12	32.12	0
D08	SYBR	CTGF	Unkn	TEAD4	31.46	32.46	0
D09	SYBR	CTGF	Unkn	TEAD4	31.58	31.58	0
D10	SYBR		Unkn		N/A	0	0
D11	SYBR		Unkn		N/A	0	0
D12	SYBR		Unkn		N/A	0	0
E01	SYBR	AJUBA	Unkn	INPUT	28.21	28.21	0		84.45	28.15	21.506
E02	SYBR	AJUBA	Unkn	INPUT	28.06	28.06	0		0.0193685	0.0110474	0.0277736
E03	SYBR	AJUBA	Unkn	INPUT	28.18	28.18	0		0.939429	0.945963	0.91374
E04	SYBR	AJUBA	Unkn	IGG	33.84	33.84	0
E05	SYBR	AJUBA	Unkn	IGG	34.65	34.65	0
E06	SYBR	AJUBA	Unkn	IGG	33.32	33.32	0
E07	SYBR	AJUBA	Unkn	TEAD4	28.24	28.24	0
E08	SYBR	AJUBA	Unkn	TEAD4	28.23	28.23	0
E09	SYBR	AJUBA	Unkn	TEAD4	28.28	28.28	0
E10	SYBR		Unkn		N/A	0	0
E11	SYBR		Unkn		N/A	0	0
E12	SYBR		Unkn		N/A	0	0
F01	SYBR	SAMD4A	Unkn	INPUT	27.56	27.56	0		82.42	27.4733	20.8293
F02	SYBR	SAMD4A	Unkn	INPUT	27.4	27.4	0		0.0270766	0.00880897	0.0250888
F03	SYBR	SAMD4A	Unkn	INPUT	27.46	27.46	0		1.20848	1.05936	1.15925
F04	SYBR	SAMD4A	Unkn	IGG	32.68	32.68	0
F05	SYBR	SAMD4A	Unkn	IGG	34.3	34.3	0
F06	SYBR	SAMD4A	Unkn	IGG	32.79	32.79	0
F07	SYBR	SAMD4A	Unkn	TEAD4	27.2	27.2	0
F08	SYBR	SAMD4A	Unkn	TEAD4	27.39	27.39	0
F09	SYBR		Unkn	TEAD4	27.26	27.26	0
F10	SYBR		Unkn		N/A	0	0
F11	SYBR		Unkn		N/A	0	0
F12	SYBR		Unkn		N/A	0	0
G01	SYBR	WTIP	Unkn	INPUT	29.12	29.12	0		87.23	29.0767	22.4327
G02	SYBR	WTIP	Unkn	INPUT	29.79	29.79	0		0.00149724	0.00102976	0.00153933
G03	SYBR	WTIP	Unkn	INPUT	28.32	28.32	0		1.62059	0.880578	1.74899
G04	SYBR	WTIP	Unkn	IGG	38.46	38.46	0
G05	SYBR	WTIP	Unkn	IGG	39	39	0
G06	SYBR	WTIP	Unkn	IGG	38.42	38.42	0
G07	SYBR	WTIP	Unkn	TEAD4	28.38	28.38	0
G08	SYBR	WTIP	Unkn	TEAD4	29.26	29.26	0
G09	SYBR	WTIP	Unkn	TEAD4	28.27	28.27	0
G10	SYBR		Unkn		N/A	0	0
G11	SYBR		Unkn		N/A	0	0
G12	SYBR		Unkn		N/A	0	0
H01	SYBR	NOCT	Unkn	INPUT	27.73	27.73	0		82.75	27.5833	20.9393
H02	SYBR	NOCT	Unkn	INPUT	27.69	27.69	0		0.00816229	0.0102601	0.00816229
H03	SYBR	NOCT	Unkn	INPUT	27.33	27.33	0		0.675108	0.718564	0.698915
H04	SYBR	NOCT	Unkn	IGG	34.52	34.52	0
H05	SYBR	NOCT	Unkn	IGG	34.19	34.19	0
H06	SYBR	NOCT	Unkn	IGG	33.47	33.47	0
H07	SYBR	NOCT	Unkn	TEAD4	28.15	28.15	0
H08	SYBR	NOCT	Unkn	TEAD4	28.06	28.06	0
H09	SYBR	NOCT	Unkn	TEAD4	28.1	28.1	0
H10	SYBR		Unkn		N/A	0	0
H11	SYBR		Unkn		N/A	0	0
H12	SYBR		Unkn		N/A	0	0
计算方法
		Step 1			Step 2
		*Adjusted input to 100%			Percent input
	Raw Ct	(Ct Input - 6.644)		Triplicate average Ct	100*2^(Adjusted input - Ct (IP)
Input (1%)	32.7	26.1	Adjusted input	26.1
			Mock (IgG)	34.6	0.3
			Antibody #1	31.3	2.7
			Antibody #2	29.9	7.2

## Sheet: Figure 1C
	HCT116-si NC			HCT116- si YT1			HCT116- si YT2			NC vs siYT1			NC vs siYT2
YAP	0.967422	1.02968	1.00388	0.141508	0.139493	0.190539	0.161433	0.168071	0.180714	P value<0.0001			P value<0.0001
TAZ	1.01793	1.09756	0.895069	0.189009	0.203358	0.22014	0.292788	0.267088	0.291401	P value=0.0002			P value=0.0003
CTGF	1.1176	0.948769	0.943089	0.0970527	0.147814	0.053566	0.096683	0.0943844	0.0784029	P value=0.0001			P value<0.0001
AJUBA	0.941577	1.07466	0.988263	0.452872	0.395629	0.427868	0.333172	0.302421	0.308349	P value=0.0002			P value<0.0001
SAMD4A	0.948952	1.0413	1.012	0.417315	0.415963	0.364044	0.31364	0.356826	0.396273	P value<0.0001			P value<0.0001
NOCT	1.02168	0.878018	1.11476	0.598425	0.589503	0.614069	0.490191	0.499561	0.512811	P value=0.0043			P value=0.0019
WTIP	1.09291	0.914031	1.00105	0.413604	0.427648	0.365429	0.297316	0.373273	0.341577	P value=0.0003			P value=0.0004
PNRC1	0.961495	1.09237	0.952099	1.9071	2.19089	1.75006	3.00177	3.17054	2.61214	P value=0.0030			P value<0.0001
	231-siNC			231-siYT1			231-siYT1
YAP	1.07073	1.03481	0.902532	0.33699	0.339302	0.347579	0.242469	0.24758	0.255473	P value=0.0002			P value=0.0001
TAZ	1.00649	1.13007	0.87919	0.37972	0.443043	0.587871	0.620691	0.479245	0.568015	P value=0.0049			P value=0.0057
CTGF	0.959083	1.0923	0.954553	0.173529	0.243284	0.295797	0.25353	0.211898	0.316438	P value=0.0002			P value=0.0002
AJUBA	0.995472	1.01063	0.993979	0.747415	0.759599	0.727937	0.76275	0.850346	0.737363	P value<0.0001			P value=0.0174
SAMD4A	0.949211	0.995099	1.05869	0.504503	0.529464	0.474771	0.564614	0.571166	0.57076	P value=0.0001			P value=0.0002
NOCT	1.00469	0.987613	1.00782	0.599868	0.56769	0.633112	0.723775	0.741252	0.814211	P value=0.0001			P value=0.0002
WTIP	0.959083	1.0923	0.954553	0.427279	0.486569	0.591594	0.334534	0.423796	0.316438	P value=0.0016			P value=0.0003
PNRC1	1.08162	1.09185	0.846766	5.73	5.30322	5.61597	7.5578	6.92069	5.71998	P value<0.0001			P value=0.0005
	A549-siNC			A549-siYT1			A549-siYT2
YAP	0.997793	0.979675	1.02301	0.350402	0.395621	0.359896	0.411176	0.481847	0.339772	P value<0.0001			P value=0.0002
TAZ	0.953346	1.10005	0.95354	0.264873	0.222747	0.273737	0.307136	0.288277	0.243416	P value=0.0001			P value=0.0002
CTGF	1.04324	1.02427	0.935837	0.301529	0.363698	0.440807	0.349812	0.410632	0.491072	P value=0.0003			P value=0.0004
AJUBA	0.835292	1.08797	1.10039	0.484004	0.503064	0.525747	0.560404	0.553097	0.550533	P value=0.0045			P value=0.0063
SAMD4A	0.976328	1.06006	0.966216	0.544471	0.553917	0.632945	0.453201	0.457708	0.467695	P value=0.0005			P value<0.0001
NOCT	1.12779	0.928593	0.954879	0.51633	0.527172	0.552043	0.524118	0.506643	0.527173	P value=0.0017			P value=0.0015
WTIP	1.02576	1.01414	0.9613	0.503414	0.525147	0.410212	0.469694	0.558025	0.550232	P value=0.0002			P value=0.0002
PNRC1	0.953603	1.03099	1.01714	2.48701	2.46789	2.4768	3.09939	2.50915	2.4636	P value<0.0001			P value=0.0012

## Sheet: Figure 1D
	116-pBABE			116-pBABE-YAP5SA			116-pBABE-YAP5SA/S94A			pBABE vs pBABE-YAP5SA			pBABE-YAP5SA vs pBABE-YAP5SAS94A
PNRC1	0.979057	1.00729	1.014	0.249129	0.229768	0.223127	0.997857	1.13895	1.07631	P value<0.0001			P value<0.0001
AJUBA	1.00668	1.03071	0.963769	4.91889	4.74381	4.74003	1.67688	1.61844	1.58946	P value<0.0001			P value<0.0001
SAMD4A	1.01311	1.00924	0.978022	3.94011	3.75077	3.71933	1.60278	1.59596	1.40292	P value<0.0001			P value<0.0001
NOCT	0.91841	1.04416	1.04279	3.50748	4.15792	3.93098	0.966627	1.04057	1.00608	P value=0.0001			P value=0.0001
WTIP	1.01878	1.03978	0.94401	3.25318	4.03319	3.52421	1.65898	1.75802	1.50716	P value=0.0004			P value=0.0012
CTGF	1.02183	1.03445	0.946039	84.8243	84.5199	98.9934	0.709677	0.677817	0.685236	P value<0.0001			P value<0.0001
YAP	1.03473	0.965651	1.00082	26.3753	21.8051	21.3671	34.103	30.7704	29.1263	P value=0.0002			P value<0.0001
	MCF7-pBABE			MCF7-pBABE-YAP5SA			MCF7-pBABE-YAP5SAS94A
PNRC1	1.05918	1.01421	0.930905	0.501957	0.518359	0.521057	1.25111	1.12692	0.876394	P value=0.0002			P value=0.0066
AJUBA	0.72636	1.14089	1.20672	4.15538	4.1959	4.02381	1.12498	1.22662	0.816692	P value<0.0001			P value<0.0001
SAMD4A	0.974449	1.12394	0.913056	3.60134	4.41098	3.90908	1.03675	1.12081	1.18914	P value=0.0003			P value=0.0003
NOCT	1.05541	0.897073	1.05621	0.895773	0.94721	1.00401	0.977478	0.978471	0.910547	P value=0.4300			P value=0.8741
WTIP	0.858505	0.991813	1.17443	3.68795	3.78393	3.48292	1.12358	1.2497	1.13665	P value<0.0001			P value<0.0001
CTGF	1.12199	1.01928	0.87442	14.8221	14.8179	14.1222	2.98286	2.79811	2.3116	P value<0.0001			P value<0.0001
YAP	0.966131	0.928008	1.11535	28.0613	18.9683	21.5078	53.1178	57.5833	47.1199	P value=0.0013			P value<0.0001
	A549-pBABE			A549-pBABE-YAP5SA			A549-pBABE-YAP5SAS94A
PNRC1	1.00913	1.00646	0.984595	0.529985	0.529319	0.526018	0.90965	0.890237	0.856069	P value<0.0001			P value<0.0001
AJUBA	0.949552	0.922055	1.14215	1.19977	1.18158	1.0797	0.796696	0.794775	0.837735	P value=0.1310			P value=0.0010
SAMD4A	1.0204	1.00721	0.972988	1.76689	1.71353	1.49284	1.26119	1.07649	0.935548	P value=0.0015			P value=0.0109
NOCT	0.914913	1.01902	1.0726	1.19968	1.25316	1.05743	0.76932	0.788116	0.746105	P value=0.0873			P value=0.0025
WTIP	1.10286	0.969202	1.03068	1.24433	0.972706	1.37666	0.805917	0.73205	0.739188	P value=0.2607			P value=0.0223
CTGF	1.09859	0.9875	0.921779	2.8053	3.67648	3.47145	1.1405	1.24225	1.17108	P value=0.0010			P value=0.0013
YAP	0.983604	0.982894	1.03436	32.2056	30.9727	34.257	36.7856	38.2681	38.4706	P value<0.0001			P value<0.0001
