# Supplementary material for: YAP/TAZ enhances P-body formation to promote tumorigenesis
Source: eLife. 2024 Jul 24;12:RP88573. doi: 10.7554/eLife.88573 (PMC11268890; doi:10.7554/eLife.88573)
Supplement: Figure 2—figure supplement 1—source data 1. [file elife-88573-fig2-figsupp1-data1.xlsx]

## Sheet: Figure 2-Figure Supplement 1A
DDX6					DCP1A
	NC	siYT1	siYT2			NC	siYT1	siYT2
NC vs siYT1:P value<0.0001	3	0	0		NC vs siYT1:P value<0.0001	0	0	0
NC vs siYT2 P value<0.0001	3	0	0		NC vs siYT2 P value<0.0001	0	0	0
	4	0	0			1	0	0
	4	0	0			1	0	0
	4	0	0			2	0	0
	4	0	0			2	0	0
	4	0	0			3	0	0
	4	0	0			3	0	0
	4	0	0			3	0	0
	4	0	0			4	0	0
	4	0	0			4	1	0
	4	0	0			4	1	0
	4	0	0			4	1	0
	4	0	0			4	1	0
	4	0	0			4	1	0
	5	0	0			4	1	0
	5	0	0			4	1	0
	5	0	0			4	1	0
	5	0	0			4	1	0
	5	0	0			4	1	0
	5	0	0			4	1	0
	5	0	0			4	1	0
	5	1	0			5	1	0
	5	1	1			5	1	1
	5	1	1			5	1	1
	5	1	1			5	1	1
	5	1	1			5	1	1
	5	1	1			5	1	1
	5	1	1			5	1	1
	5	1	1			5	1	1
	5	1	1			5	1	1
	5	1	1			5	1	1
	5	1	1			5	1	1
	5	1	1			5	1	1
	5	1	1			5	1	1
	5	1	1			5	1	2
	5	1	1			5	1	2
	5	1	1			5	1	2
	5	1	1			5	1	2
	5	1	2			5	1	2
	5	2	2			5	2	2
	6	2	2			6	2	2
	6	2	2			6	2	2
	6	2	2			6	2	2
	6	2	2			6	2	2
	6	2	2			6	2	2
	6	2	2			6	2	2
	6	2	2			6	2	2
	6	2	2			6	2	2
	6	2	2			6	2	2
	6	2	2			6	2	2
	6	2	2			6	2	2
	6	3	2			6	3	2
	6	3	2			6	3	2
	6	3	2			6	3	2
	6	3	2			6	3	2
	6	3	2			6	3	2
	6	3	2			6	3	2
	6	3	2			6	3	2
	6	3	2			6	3	2
	6	3	2			6	3	2
	6	3	3			6	3	3
	6	3	3			6	3	3
	6	3	3			6	3	3
	6	3	3			6	3	3
	6	3	3			6	3	3
	6	3	3			6	3	3
	6	3	3			6	3	3
	6	3	3			6	3	3
	6	3	3			7	3	3
	6	3	3			7	3	3
	6	3	3			7	3	3
	6	3	3			7	3	3
	6	3	3			7	3	3
	6	3	3			7	3	3
	6	3	3			7	3	3
	7	3	4			7	3	4
	7	4	3			7	4	4
	7	4	4			7	4	4
	7	4	4			7	4	4
	7	4	4			7	4	4
	7	4	4			7	4	4
	7	4	4			7	4	4
	7	4	4			7	4	4
	7	4	4			7	4	4
	7	4	4			7	4	4
	8	4	4			8	4	4
	8	4	4			8	4	4
	8	4	4			8	4	4
	8	4	4			8	4	4
	8	4	4			8	4	4
	8	4	4			8	4	4
	8	4	4			8	4	4
	8	4	4			8	4	4
	8	5	5			9	5	5
	8	5	5			9	5	5
	9	6	5			9	6	5
	9	7	6			9	7	6
	9	7	6			9	7	9
	9	8	7			9	8	9

## Sheet: Figure 2-Figure Supplement 1B
DDX6					DCP1A
	pBABE	YAP5SA	YAP5SAS94A			pBABE	YAP5SA	YAP5SAS94A
pBABE vs pBABE-YAP5SA:P value<0.0001	0	5	0		pBABE vs pBABE-YAP5SA:P value<0.0001	0	5	0
pBABE-YAP5SA vs pBABE-YAP5SAS94A:P value<0.0001	1	6	0		pBABE-YAP5SA vs pBABE-YAP5SAS94A:P value<0.0001	1	6	0
	1	6	0			1	6	0
	2	6	0			2	6	0
	2	6	0			2	6	0
	2	8	0			2	8	0
	2	8	0			2	8	0
	3	8	0			3	8	0
	3	8	0			3	8	0
	3	8	1			3	8	1
	3	8	1			3	8	1
	3	9	1			3	9	1
	3	9	1			3	9	1
	3	10	1			3	10	1
	3	10	1			3	10	1
	3	10	1			3	10	1
	4	10	1			4	10	1
	4	10	1			4	10	1
	4	10	1			4	10	1
	4	10	1			4	10	1
	4	10	2			4	10	2
	4	10	2			4	10	2
	4	11	2			4	11	2
	4	11	2			4	11	2
	4	11	2			4	11	2
	4	11	2			4	11	2
	4	12	2			4	12	2
	5	12	2			5	12	2
	5	12	3			5	12	3
	5	12	3			5	12	3
	5	12	3			5	12	3
	5	12	3			5	13	3
	5	12	3			6	13	3
	5	12	3			6	13	3
	5	13	3			6	13	3
	5	13	3			6	13	3
	5	13	3			6	13	3
	5	13	3			6	13	3
	5	13	3			6	13	4
	5	13	3			6	13	4
	5	13	3			6	13	4
	6	13	3			6	13	4
	6	14	3			6	14	4
	6	14	3			6	14	4
	6	14	3			6	14	4
	6	14	3			6	14	5
	6	14	3			6	14	5
	6	14	3			6	14	5
	6	15	4			7	15	5
	6	15	4			7	15	6
	6	15	4			7	15	6
	6	15	4			7	15	6
	6	15	4			7	15	6
	6	15	4			7	15	6
	6	15	4			7	15	6
	6	15	4			7	15	7
	6	15	5			7	15	7
	6	15	5			7	15	7
	6	15	5			8	15	7
	7	15	5			8	15	7
	7	15	5			8	15	7
	7	15	5			8	15	7
	7	16	5			8	16	7
	7	16	5			8	16	7
	7	16	5			8	16	7
	7	16	5			8	16	7
	7	16	5			8	16	8
	7	16	6			8	16	8
	7	16	6			8	16	8
	7	16	6			8	16	8
	7	16	6			8	16	8
	7	17	6			8	17	8
	7	17	7			8	17	8
	8	17	7			8	17	8
	8	18	7			8	18	8
	8	18	7			8	18	9
	8	18	7			8	18	9
	8	18	8			8	18	9
	8	18	8			8	18	9
	8	18	9			8	18	9
	8	18	9			8	18	9
	8	19	9			8	19	9
	8	19	9			8	19	10
	8	19	9			8	19	10
	8	19	9			8	19	10
	8	20	9			8	20	10
	9	20	9			9	20	10
	9	20	10			9	20	10
	9	20	10			9	20	10
	9	21	10			9	20	10
	10	22	10			9	20	10
	10	22	11			9	22	11
	10	22	11			9	22	11
	10	25	11			9	25	11
	10	25	11			10	25	11
	12	25	12			12	25	12
	12	26	12			12	26	12
	12	28	13			13	28	13
	12	28	13			13	28	13
	14	29	15			14	29	15

## Sheet: Figure 2-Figure Supplement 1C
DDX6	SS			FBS				DCP1A	SS			FBS
	NC	siYT1	siYT2	NC	siYT1	siYT2			NC	siYT1	siYT2	NC	siYT1	siYT2
SS-NC vs SS-siYT1:P value=0.0662	0	0	0	0	0	0		SS-NC vs SS-siYT1:P value=0.2280	0	0	0	0	0	0
SS-NC vs SS-siYT2 P value=0.6443	0	0	0	0	1	0		SS-NC vs SS-siYT2 P value=0.9463	0	0	0	0	0	0
SS-NC vs FBS-NC P value<0.0001	0	0	0	1	1	0		SS-NC vs FBS-NC P value<0.0001	0	0	0	1	0	0
FBS-NC vs FBS-siYT1 P value<0.0001	0	0	0	1	1	0		FBS-NC vs FBS-siYT1 P value<0.0001	0	0	0	1	0	0
FBS-NC vs FBS-siYT2 P value<0.0001	0	0	1	2	1	0		FBS-NC vs FBS-siYT2 P value<0.0001	0	0	1	2	0	0
	0	0	1	3	1	0			0	0	1	3	1	0
	0	0	1	3	1	0			1	0	1	3	1	0
	0	0	1	3	1	0			1	0	1	3	1	0
	0	0	1	3	1	1			1	0	1	3	1	1
	0	0	1	4	1	1			1	0	1	4	1	1
	1	0	1	4	1	1			1	0	1	4	1	1
	1	0	1	4	1	1			1	0	1	4	1	1
	1	0	2	4	1	1			1	0	2	4	1	1
	1	0	2	5	1	1			1	0	2	5	1	1
	1	0	2	5	1	1			1	0	2	5	1	1
	1	1	2	5	1	1			1	1	2	5	1	1
	1	1	2	7	1	1			1	1	2	7	1	1
	1	1	2	7	1	1			1	1	2	7	1	1
	1	1	2	7	1	2			1	1	3	7	1	2
	1	1	2	7	1	2			1	1	3	7	1	2
	2	1	2	7	2	2			1	1	3	7	1	2
	2	1	2	8	2	2			1	1	3	8	1	2
	2	1	2	8	2	2			1	1	3	8	1	2
	2	1	2	8	2	2			1	1	3	8	1	2
	2	1	3	8	2	2			1	1	3	8	1	2
	2	1	3	8	2	2			2	1	3	8	1	2
	2	2	3	8	2	2			2	1	3	8	1	2
	2	2	3	8	2	2			2	1	3	8	2	2
	2	2	3	8	2	2			2	1	3	8	2	2
	2	1	3	8	2	2			2	1	3	8	2	2
	2	2	3	8	2	2			2	2	3	8	2	2
	2	2	3	9	2	2			2	2	3	9	2	2
	2	2	3	9	2	2			2	2	3	9	2	2
	2	2	3	9	2	2			2	2	3	9	2	2
	2	2	3	9	2	2			2	2	3	9	2	2
	2	2	3	9	3	3			2	2	3	9	2	3
	2	2	3	9	3	3			2	2	3	9	2	3
	2	2	3	9	3	3			2	2	3	9	2	3
	2	2	3	9	3	3			2	2	3	9	2	3
	2	2	3	9	3	3			2	2	3	9	2	3
	2	2	3	9	3	3			2	2	3	9	2	3
	2	3	3	9	3	3			2	3	3	9	2	3
	2	3	3	9	3	3			2	3	3	9	2	3
	3	3	3	9	3	3			2	3	3	9	2	3
	3	3	3	9	3	3			2	3	3	9	2	3
	3	3	3	9	3	3			2	3	3	9	2	3
	3	3	3	9	3	3			3	3	3	9	2	3
	3	3	3	9	3	3			3	3	3	9	2	3
	4	3	3	9	3	4			3	3	3	9	2	3
	4	3	3	9	3	4			3	3	3	9	2	3
	4	3	3	9	3	4			3	3	3	9	2	3
	4	3	3	10	3	4			3	3	3	9	3	3
	4	3	3	10	3	4			3	3	3	9	3	3
	4	3	3	10	3	4			3	3	3	9	3	3
	3	3	3	10	3	4			3	3	3	9	3	3
	4	3	3	10	3	4			3	3	3	9	3	3
	4	3	3	10	3	4			4	3	3	9	3	3
	4	3	3	10	3	4			4	3	3	10	3	4
	4	3	3	10	3	4			4	3	3	10	3	4
	4	3	3	10	3	4			4	3	3	10	3	4
	4	3	3	10	3	4			4	3	3	10	3	4
	4	3	3	10	3	4			4	3	3	10	4	4
	3	3	3	10	3	4			4	3	3	10	4	4
	4	3	3	10	3	4			4	3	3	10	4	4
	4	3	3	10	3	4			4	3	3	10	4	4
	4	3	3	10	4	4			4	3	3	10	4	4
	4	3	3	10	4	4			4	3	3	10	4	4
	4	3	3	10	4	4			4	3	3	10	4	4
	4	3	3	10	4	4			4	3	3	10	4	4
	4	3	3	10	4	4			4	3	3	10	4	4
	4	3	3	10	4	4			4	3	3	10	4	4
	4	3	4	10	4	4			4	3	3	10	4	4
	4	3	4	10	4	4			4	3	3	10	5	4
	4	3	4	11	4	4			4	3	3	10	5	4
	4	3	4	11	4	5			4	3	3	10	5	4
	4	3	4	11	4	5			4	4	3	10	5	4
	4	3	4	11	4	5			4	4	3	10	5	4
	4	4	4	11	4	5			4	4	3	10	5	4
	4	4	4	11	4	5			4	4	3	10	5	5
	4	4	4	11	4	5			4	4	3	10	5	5
	4	4	4	11	4	5			4	4	3	10	5	5
	4	4	4	11	4	5			4	4	4	11	6	5
	5	4	4	11	4	5			4	4	4	11	6	5
	5	4	4	12	4	5			4	4	4	11	6	5
	5	5	4	12	5	5			4	5	4	11	6	5
	5	5	4	12	5	6			4	5	4	11	6	6
	5	5	4	12	5	6			5	5	4	11	6	6
	6	5	4	14	5	6			5	5	4	12	6	6
	6	5	4	14	5	6			5	5	4	12	6	6
	6	5	4	14	5	6			5	5	4	14	6	6
	6	5	5	14	5	6			5	5	4	14	6	6
	6	5	5	14	6	6			5	5	4	14	7	6
	6	5	5	15	6	6			6	5	4	15	7	6
	6	6	5	15	6	6			6	6	4	15	7	6
	7	6	5	15	6	6			7	6	5	15	7	6
	7	7	5	16	6	6			7	7	5	15	7	6
	7	7	5	16	7	7			7	7	5	15	7	7
	7	7	5	16	7	9			7	7	5	16	7	9
	7	7	6	16	7	10			7	7	6	16	7	10
	7	7	6	17	8	10			7	7	6	17	8	10
