# Supplementary material for: YAP/TAZ enhances P-body formation to promote tumorigenesis
Source: eLife. 2024 Jul 24;12:RP88573. doi: 10.7554/eLife.88573 (PMC11268890; doi:10.7554/eLife.88573)
Supplement: Figure 2—figure supplement 2—source data 1. [file elife-88573-fig2-figsupp2-data1.xlsx]

## Sheet: Figure 2-Figure Supplement 2A
DDX6					LSM14A
	pBABE	YAP5SA	YAP5SAS94A			pBABE	YAP5SA	YAP5SAS94A
pBABE vs pBABE-YAP5SA:P value<0.0001	1	4	0		pBABE vs pBABE-YAP5SA:P value<0.0001	12	15	7
pBABE-YAP5SA vs pBABE-YAP5SAS94A:P value<0.0001	1	6	0		pBABE-YAP5SA vs pBABE-YAP5SAS94A:P value<0.0001	9	25	15
	2	6	0			7	29	9
	2	6	0			9	31	17
	2	6	0			20	27	12
	2	7	0			15	18	17
	2	8	0			17	18	9
	2	8	0			9	11	7
	3	8	0			11	19	9
	3	8	0			10	28	9
	3	8	0			15	29	15
	3	9	0			12	11	11
	3	9	0			10	19	9
	3	10	0			19	22	7
	3	10	1			21	27	15
	3	10	1			10	25	17
	4	10	1			19	40	12
	4	10	1			21	25	13
	4	10	1			10	19	12
	4	10	1			9	17	19
	4	10	2			7	22	12
	4	10	2			8	27	7
	4	11	2			8	28	9
	4	11	2			8	19	0
	4	11	2			9	23	3
	4	11	2			9	20	5
	4	11	2			12	19	15
	4	12	2			11	18	7
	4	12	3			15	27	9
	4	12	3			14	27	17
	4	12	3			13	28	17
	5	12	3			9	40	13
	5	12	3			7	28	15
	5	12	3			6	32	11
	5	13	3			10	31	9
	5	13	3			11	19	7
	5	13	3			10	19	9
	5	13	3			5	27	15
	5	13	3			7	15	17
	5	13	3			11	20	12
	5	13	3			12	12	13
	5	13	3			12	18	11
	5	14	3			12	9	19
	5	14	3			12	21	21
	6	14	3			10	22	5
	6	14	3			9	27	17
	6	14	3			7	29	11
	6	14	3			9	9	12
	6	14	4			9	8	19
	6	15	4			12	19	15
	6	15	4			11	21	17
	6	15	4			19	28	16
	6	15	4			11	29	15
	6	15	4			15	27	7
	6	15	4			7	27	8
	6	15	4			9	9	7
	6	15	4			18	7	9
	6	15	4			12	11	8
	6	15	4			19	11	7
	7	15	4			10	12	9
	7	15	4			15	12	10
	7	15	4			9	12	12
	7	16	4			5	27	10
	7	16	4			3	19	10
	7	16	4			3	19	15
	7	16	4			2	27	14
	7	16	4			0	27	13
	7	16	4			19	15	17
	7	16	4			1	20	1
	7	16	5			5	12	13
	7	16	5			7	27	9
	7	17	5			9	29	10
	7	17	5			5	32	12
	7	17	5			11	18	13
	7	17	5			10	17	15
	7	17	5			11	9	10
	8	18	5			17	22	12
	8	18	5			12	27	11
	8	18	5			12	27	10
	8	18	5			12	30	17
	8	18	6			12	19	15
	8	19	6			18	9	13
	8	19	6			17	9	12
	8	19	6			9	8	10
	8	19	6			10	19	9
	8	19	7			15	7	7
	9	20	7			3	15	10
	9	20	7			9	12	9
	9	20	7			5	11	7
	9	20	7			3	10	10
	10	22	8			3	7	15
	10	22	8			3	22	10
	10	22	9			5	27	12
	10	25	9			7	28	12
	10	25	9			3	26	13
	11	25	9			5	22	13
	12	26	9			7	15	12
	12	26	9			19	17	11
	12	28	9			2	19	15
	14	28	9			9	12	12

## Sheet: Figure 2-Figure Supplement 2B
DDX6					LSM14A
	SS	FBS				SS	FBS
SS vs FBS P value<0.0001	0	1			SS vs FBS P value<0.0001	0	0
	0	1				0	1
	0	2				0	3
	0	4				0	3
	0	4				0	3
	0	4				0	4
	0	5				0	4
	0	7				0	5
	0	8				0	6
	0	8				0	6
	0	9				0	7
	0	10				0	7
	0	10				0	7
	0	10				0	9
	0	10				0	9
	0	11				0	9
	0	11				0	9
	0	11				0	10
	0	12				0	10
	0	12				0	10
	0	12				1	10
	0	12				1	10
	0	12				1	11
	0	12				1	11
	0	13				1	11
	0	13				1	12
	1	13				1	12
	1	13				1	12
	1	13				1	12
	1	13				1	12
	1	13				1	13
	1	13				1	13
	1	14				1	13
	1	14				1	13
	1	14				1	13
	1	14				1	13
	1	14				1	13
	1	14				1	13
	1	14				1	13
	1	14				1	14
	1	14				1	14
	1	14				1	14
	1	14				1	14
	1	14				1	14
	1	14				2	14
	1	15				2	14
	1	15				2	14
	1	15				2	14
	1	15				2	15
	1	15				2	15
	1	15				2	15
	1	15				2	15
	1	15				2	15
	1	15				2	15
	1	15				2	15
	1	15				2	15
	2	15				2	15
	2	15				2	15
	2	15				2	15
	2	15				2	15
	2	15				2	15
	2	15				2	15
	2	15				2	15
	2	15				2	16
	2	16				2	16
	2	16				2	16
	2	16				2	16
	2	16				3	16
	2	16				3	16
	3	16				3	16
	3	16				3	16
	3	16				3	16
	3	16				3	16
	3	16				3	16
	3	16				3	16
	3	16				3	16
	3	16				3	17
	3	17				3	17
	4	18				3	17
	4	18				3	17
	4	18				3	17
	4	20				3	17
	4	20				3	17
	4	20				3	18
	4	20				3	18
	4	20				4	18
	4	20				4	18
	4	21				4	18
	4	21				4	18
	5	21				4	18
	5	21				4	18
	5	23				5	20
	6	23				5	20
	6	23				5	20
	6	24				6	20
	6	25				6	20
	8	25				7	21
	8	26				7	21
	8	26				7	22
	10	26				8	23

## Sheet: Figure 2-Figure Supplement 2C
DDX6					LSM14A
	HD	LD				HD	LD
HD vs LD P value<0.0001	0	2			HD vs LD P value<0.0001	0	2
	0	2				0	2
	0	4				0	2
	0	4				0	3
	0	4				0	5
	0	4				0	5
	0	4				0	5
	0	6				0	5
	0	6				0	6
	0	6				0	6
	0	6				0	7
	0	6				0	7
	0	7				0	7
	0	7				0	8
	0	8				0	8
	1	9				0	8
	1	10				0	8
	1	10				0	9
	1	10				0	9
	1	10				0	9
	1	10				0	9
	1	10				0	9
	1	11				0	9
	1	11				0	9
	1	12				0	10
	1	12				1	10
	1	12				1	10
	1	12				1	10
	1	13				1	10
	1	13				1	10
	1	13				1	10
	1	13				1	10
	1	13				1	11
	1	13				1	11
	1	13				1	11
	1	13				1	11
	1	14				1	11
	1	14				1	11
	1	14				1	11
	1	14				1	11
	1	14				1	11
	2	14				1	11
	2	14				1	11
	2	14				1	12
	2	14				1	12
	2	14				1	12
	2	14				1	12
	2	14				1	12
	2	15				1	12
	2	15				1	12
	2	15				1	12
	2	15				1	12
	2	15				1	12
	2	15				1	12
	2	15				1	12
	2	15				1	12
	2	15				2	12
	2	15				2	12
	2	15				2	12
	2	15				2	12
	2	15				2	12
	2	15				2	12
	2	15				2	13
	2	15				2	13
	2	15				2	13
	2	15				2	13
	2	15				2	13
	2	16				2	13
	3	16				2	13
	3	16				2	13
	3	16				2	13
	3	16				3	13
	3	16				3	14
	3	16				3	14
	3	16				3	14
	3	16				3	14
	3	16				3	15
	3	17				3	15
	3	17				3	15
	3	18				3	15
	3	18				3	15
	3	18				3	16
	3	19				3	16
	3	19				4	16
	3	19				4	16
	3	20				5	16
	4	20				5	16
	4	20				5	17
	4	20				5	17
	5	20				5	17
	5	20				5	19
	6	22				6	19
	6	22				6	19
	6	22				6	20
	7	23				7	20
	7	23				7	21
	7	23				7	21
	7	25				7	21
	8	25				8	22
	9	27				9	23

## Sheet: Figure 2-Figure Supplement 2D
DDX6
	Soft	Stiff
Soft vs Stiff P value<0.0001	0	3
	0	3
	0	4
	0	4
	0	4
	0	4
	0	4
	0	4
	0	5
	0	5
	0	5
	0	5
	0	6
	0	6
	0	6
	0	6
	0	6
	1	6
	1	6
	1	6
	1	6
	1	6
	1	6
	1	7
	1	7
	1	7
	1	7
	1	7
	1	7
	1	7
	1	7
	1	7
	1	7
	1	7
	1	7
	2	7
	2	7
	2	7
	2	7
	2	7
	2	8
	2	8
	2	8
	2	8
	2	8
	2	8
	2	8
	2	8
	2	8
	2	8
	2	8
	2	8
	2	8
	2	8
	2	8
	2	8
	2	8
	2	8
	2	8
	2	8
	2	8
	2	8
	2	8
	2	8
	2	8
	2	8
	2	8
	2	8
	2	8
	2	8
	2	8
	3	8
	3	9
	3	9
	3	9
	3	10
	3	10
	3	10
	3	10
	3	10
	3	10
	3	10
	3	10
	3	10
	3	10
	3	10
	4	10
	4	10
	4	10
	4	10
	4	11
	4	11
	4	12
	4	12
	4	12
	6	13
	6	13
	5	13
	6	14
	6	15

## Sheet: Figure 2-Figure Supplement 2E
	pBABE			YAP5SA			YAP5SAS94A				pBABE vs YAP5SA				YAP5SA vs YAP5SAS94A
Pnrc1	0.945334	1.05252	1.00504	0.393766	0.40967	0.404228	1.10503	1.11922	1.09969		P value<0.0001				P value<0.0001
Ajuba	0.992159	0.977876	1.03071	1.40603	1.54193	1.47078	0.818601	0.772846	0.772735		P value<0.0001				P value<0.0001
Noct	0.975021	1.02747	0.998203	3.07825	3.11788	3.33157	0.706239	0.759025	0.712755		P value<0.0001				P value<0.0001
Samd4a	0.985828	1.00017	1.0142	1.27585	1.2463	1.2552	0.778439	0.744842	0.800944		P value<0.0001				P value<0.0001
Ctgf	1.01447	1.01896	0.967397	3.32682	3.29894	3.41552	0.713173	0.732205	0.689923		P value<0.0001				P value<0.0001
Yap	1.00153	0.959672	1.04043	11.7495	11.6668	11.5769	37.4	36.5572	34.9605

## Sheet: Figure 2-Figure Supplement 2F
	3T3 SS			3T3 FBS				SS vs FBS
Pnrc1	1.01697	0.974897	1.00863	0.176353	0.202081	0.198528		P value<0.0001
Ajuba	1.03749	1.00748	0.956713	1.4112	1.31205	1.36385		P value=0.0006
Samd4a	0.903548	1.0033	1.10311	0.383635	0.405387	0.427257		P value=0.0005
Noct	1.03929	0.941609	1.02186	1.67367	1.72465	1.68166		P value<0.0001
Ctgf	1.42758	0.974032	0.719159	24.9827	20.4957	17.0551		P value=0.0010

## Sheet: Figure 2-Figure Supplement 2G
	3T3 HD			3T3 LD				HD vs LD
Pnrc1	1.01192	1.01366	0.974902	0.623076	0.406205	0.560252		P value=0.0020
AJjuba	0.985179	0.967654	1.04897	1.6439	1.73671	1.74065		P value=0.0006
Samd4a	1.04749	1.07713	0.886305	2.00722	1.63884	2.01994		P value=0.0005
Noct	1	0.946301	1.05675	1.60738	1.59143	1.62348		P value<0.0001
Ctgf	0.850576	0.968798	1.21354	13.4058	9.4744	7.43022		P value=0.0066

## Sheet: Figure 2-Figure Supplement 2H
	Soft			Stiff				Soft vs Stiff
Pnrc1	1.14076	0.972655	0.90125	0.692555	0.697372	0.655197		P value=0.0110
Ajuba	0.970412	1.05458	0.977162	1.28047	1.16205	1.17827		P value=0.0109
Samd4a	1.10701	0.990803	0.911725	1.63203	1.47087	1.40121		P value=0.0050
Noct	1.0473	0.983959	0.970412	1.90088	1.68959	1.83613		P value=0.0003
Ctgf	0.90125	1.09429	1.01396	2.9897	2.71321	2.67585		P value<0.0001
