# Supplementary material for: YAP/TAZ enhances P-body formation to promote tumorigenesis
Source: eLife. 2024 Jul 24;12:RP88573. doi: 10.7554/eLife.88573 (PMC11268890; doi:10.7554/eLife.88573)
Supplement: Figure 2—source data 1. [file elife-88573-fig2-data1.xlsx]

## Sheet: Figure 2A
DDX6					DCP1A
HCT-116NC	HCT-116siYT1	HCT-116siYT2			HCT-116NC	HCT-116siYT1	HCT-116siYT2
3	0	0			3	0	0
3	0	0			4	0	0
4	0	0			4	0	0
4	0	0			4	0	0
4	0	0			5	0	0
4	0	0			5	0	0
4	0	0			5	0	0
5	0	0			5	0	0
5	0	0			5	0	0
5	0	0			5	0	0
5	0	0			5	0	0
5	0	0			5	0	0
5	0	0			5	0	0
6	0	0			5	0	0
6	0	0			5	0	0
6	0	0			6	0	1
6	0	0			6	0	1
6	0	0			6	0	1
6	0	0			6	0	1
6	0	0			6	0	1
6	0	0			6	0	1
7	0	0			6	0	1
7	1	0			6	0	1
7	1	1			6	0	1
7	1	1			6	0	1
7	1	1			6	1	1
8	1	1			6	1	1
8	1	1			6	1	1
8	1	1			6	1	1
8	1	1			6	1	1
8	1	1			6	1	1
8	1	1			6	1	1
8	1	1			6	1	2
8	1	1			6	1	2
8	1	1			6	1	2
8	1	1			6	1	2
8	1	1			7	1	2
8	1	1			7	1	2
8	1	1			7	1	2
8	1	2			7	1	2
8	2	2			7	1	2
8	2	2			7	1	2
9	2	2			7	1	2
9	2	2			7	2	2
9	2	2			7	2	2
9	2	2			7	2	2
9	2	2			7	2	2
9	2	2			7	2	2
9	2	2			7	2	2
9	2	2			7	2	2
9	2	2			7	2	2
9	2	2			7	2	2
9	3	2			7	2	2
9	3	2			7	2	3
9	3	2			7	2	3
9	3	2			7	3	3
9	3	3			7	3	3
9	3	3			7	3	3
9	3	3			7	3	3
9	3	3			7	3	3
9	3	3			7	3	3
9	3	3			7	3	3
9	3	3			7	3	3
9	3	3			7	3	3
10	3	3			8	3	3
10	3	3			8	3	3
10	3	3			8	4	3
10	3	3			8	4	4
10	3	3			8	4	4
10	3	3			8	4	4
10	3	3			8	4	4
10	3	3			8	4	4
10	3	3			8	4	4
10	3	4			8	4	4
10	3	4			8	4	4
10	3	4			9	4	4
10	3	4			9	4	4
10	4	4			9	4	4
10	4	4			9	4	4
10	4	4			9	4	4
11	4	4			9	4	5
11	4	4			9	4	5
11	4	4			9	4	5
11	4	4			9	5	5
11	4	4			9	5	5
11	4	4			9	5	5
11	4	4			9	5	5
11	4	4			9	5	5
11	4	4			9	5	6
11	4	4			9	7	6
11	4	4			10	7	6
11	4	4			10	7	6
11	7	4			11	7	6
11	7	4			11	7	6
11	7	5			11	7	8
11	8	5			11	9	8
11	8	5			11	9	8
11	8	7			11	9	8
11	8	7			12	9	8
11	8	7			12	9	8
NC vs siYT1: P value<0.0001					NC vs siYT1: P value<0.0001
NC vs siYT2: P value<0.0001					NC vs siYT1: P value<0.0001

## Sheet: Figure 2B
DDX6					DCP1A
pBABE	HCT-116YAP5SA	HCT-116YAP5SAS94A			HCT116-pBABE	HCT-116YAP5SA	HCT-116YAP5SAS94A
1	4	0			1	4	0
1	6	0			1	6	0
2	6	0			2	6	0
2	6	0			2	6	0
2	6	0			2	6	0
2	7	0			2	7	0
2	7	0			2	7	0
2	7	0			2	7	0
3	8	0			3	8	0
3	8	0			3	8	0
3	8	0			3	8	0
3	9	0			3	9	0
3	9	0			3	10	0
3	9	0			3	10	0
3	9	1			3	10	1
3	9	1			3	10	1
3	10	1			3	10	1
3	10	1			3	10	1
3	10	1			3	10	1
3	10	1			4	10	1
3	10	2			4	10	2
3	10	2			4	10	2
3	11	2			4	11	2
4	11	2			4	11	2
4	11	2			4	11	2
4	11	2			4	12	2
4	11	2			4	12	2
4	12	2			4	12	2
4	12	3			4	12	3
4	12	3			4	12	3
4	12	3			4	12	3
5	12	3			5	12	3
5	12	3			5	12	3
5	12	3			5	12	3
5	12	3			5	12	3
5	12	3			5	12	3
5	12	3			5	12	3
5	12	3			5	12	3
5	12	3			5	12	3
5	13	3			5	13	3
5	13	4			5	14	4
5	13	4			5	14	4
5	14	4			5	14	4
5	14	4			5	14	4
5	14	4			5	14	4
5	14	4			5	14	4
5	14	4			5	14	4
6	15	4			6	15	4
6	15	4			6	15	4
6	15	4			6	15	4
6	15	4			6	15	4
6	15	4			6	15	4
6	15	4			6	15	4
6	15	4			6	15	4
6	15	4			6	15	4
6	15	4			6	15	4
6	15	4			6	15	5
6	15	4			6	15	5
6	15	4			6	16	5
6	15	4			7	16	5
6	15	4			7	16	5
6	15	4			7	16	5
6	16	4			7	16	5
7	16	4			7	16	5
7	16	4			7	16	5
7	16	4			7	16	5
7	16	4			7	16	5
7	16	4			7	16	5
7	16	4			7	16	5
7	16	5			7	16	5
7	16	5			7	16	5
7	17	5			7	17	5
7	17	5			7	17	5
7	17	5			7	17	5
7	17	5			7	18	5
7	17	5			7	18	5
8	18	5			8	18	5
8	18	5			8	18	5
8	18	5			8	18	5
8	18	5			8	18	5
8	18	6			8	18	6
8	19	6			8	19	6
8	19	6			8	19	6
8	19	6			8	19	6
8	19	6			8	19	6
8	19	7			8	20	6
8	20	7			9	20	6
8	20	7			9	20	6
8	20	7			9	20	7
8	20	7			9	20	7
8	20	7			10	20	7
10	20	7			10	20	7
10	21	7			10	21	7
10	22	9			10	25	8
11	22	9			11	26	8
11	24	9			11	26	8
12	25	9			12	28	8
13	26	9			13	29	9
13	28	9			13	29	9
14	28	9			14	30	9
pBABE vs pBABE-YAP5SA:P value<0.0001					pBABE vs pBABE-YAP5SA:P value<0.0001
pBABE-YAP5SA vs pBABE-YAP5SAS94A:P value<0.0001					pBABE-YAP5SA vs pBABE-YAP5SAS94A:P value<0.0001

## Sheet: Figure 2C
DDX6			DCP1A
SS	FBS		SS	FBS
0	1		0	2
0	2		0	2
0	2		0	3
0	2		0	3
0	2		0	3
0	2		0	4
0	3		0	4
0	3		0	4
1	3		0	5
1	3		1	5
1	3		1	5
1	4		1	5
1	4		1	5
1	4		1	7
2	4		1	7
2	5		1	7
2	5		1	7
2	5		2	7
2	5		2	7
2	5		2	7
2	5		2	7
2	5		2	7
2	6		2	7
2	6		2	7
2	6		2	7
2	6		2	7
3	6		2	7
3	6		2	8
3	6		2	8
3	6		2	8
3	6		2	8
3	7		2	8
3	7		2	8
3	7		2	8
3	7		2	8
3	7		3	8
3	7		3	8
3	7		3	8
3	7		3	8
3	7		3	8
3	7		3	8
3	7		3	8
3	7		3	9
3	7		3	9
3	7		3	9
3	7		3	9
3	7		3	9
3	7		3	9
3	7		3	9
3	7		3	9
3	7		3	9
3	7		3	9
3	8		3	9
3	8		3	9
3	8		3	9
3	8		3	9
3	8		3	9
4	8		3	9
4	8		4	9
4	8		4	9
4	8		4	9
4	8		4	10
4	8		4	10
4	8		4	10
4	8		4	10
4	8		4	10
4	8		4	10
4	8		4	10
4	9		4	10
4	9		4	10
4	9		4	10
4	9		4	10
4	9		4	10
4	9		4	10
4	9		4	10
4	9		4	10
4	9		4	10
4	9		4	10
4	9		4	10
4	9		4	10
4	9		4	11
4	9		4	11
4	10		4	11
5	10		5	11
5	10		5	11
6	10		5	11
6	10		5	12
6	10		5	12
6	10		5	12
6	10		5	12
6	10		5	12
6	10		6	12
6	11		6	13
6	11		6	13
6	12		6	13
6	12		7	15
7	12		7	15
7	13		7	15
7	13		7	16
8	14		10	16
SS vs FBS:P value<0.0001			SS vs FBS:P value<0.0001

## Sheet: Figure 2D
DDX6			DCP1A
HD	LD		HD	LD
0	3		0	2
0	3		0	2
0	4		0	3
0	4		0	4
0	4		0	4
0	4		0	5
0	4		1	5
0	4		1	5
0	5		1	5
0	5		1	6
0	5		1	6
0	5		1	6
0	6		1	6
0	6		1	6
0	6		1	7
0	6		1	7
0	6		1	7
1	6		1	7
1	6		1	7
1	6		1	7
1	6		1	7
1	6		1	7
1	6		1	7
1	7		2	7
1	7		2	7
1	7		2	7
1	7		2	7
1	7		2	7
1	7		2	7
1	7		2	7
1	7		2	7
1	7		2	7
1	7		2	7
1	7		2	7
1	7		2	8
2	7		2	8
2	7		2	8
2	7		2	8
2	7		2	8
2	7		2	8
2	7		2	8
2	7		2	8
2	7		2	8
2	7		2	8
2	7		2	8
2	7		2	8
2	7		2	8
2	8		2	8
2	8		2	8
2	8		2	8
2	8		2	8
2	8		2	8
2	8		2	8
2	8		2	8
2	8		2	8
2	8		2	8
2	8		2	8
2	8		3	9
2	8		3	9
2	8		3	9
2	8		3	9
2	8		3	9
2	8		3	9
2	8		3	9
2	8		3	9
2	8		3	9
2	8		3	9
2	8		3	9
2	8		3	9
2	8		3	9
2	8		3	9
3	8		3	9
3	9		3	9
3	9		3	9
3	9		3	10
3	9		3	10
3	9		3	10
3	9		3	10
3	9		3	10
3	9		3	10
3	9		3	10
3	9		3	10
3	10		4	10
3	10		4	10
3	10		4	10
3	10		4	10
3	10		4	10
3	10		4	10
3	10		4	10
3	10		5	10
3	11		5	10
4	11		6	10
4	12		6	10
4	12		7	11
4	12		7	12
5	13		7	12
5	13		7	12
5	13		7	13
6	14		7	15
6	15		8	16
HD vs LD:P value<0.0001			HD vs LD:P value<0.0001

## Sheet: Figure 2E
	HCT116-FBS 16H			HCT116--FBS +FBS 1H
PNRC1	1.04773	1.00519	0.949512	0.150099	0.143458	0.153739	P value<0.0001
AJUBA	1.03667	0.954321	1.0108	0.853616	0.803213	0.849779	P value=0.0048
SAMD4A	1.06527	1.10256	0.85141	3.03783	3.97058	2.93059	P value=0.0024
NOCT	0.996345	0.977216	1.02707	2.01552	2.10841	1.974	P value<0.0001
WTIP	1.08957	1.04264	0.880254	1.87361	2.09086	1.6796	P value=0.0029
CTGF	1.02188	0.981535	0.996995	2.34426	3.30555	2.37045	P value=0.0061

## Sheet: Figure 2F
	HCT116-HD			HCT116-LD
PNRC1	1.04929	0.94909	1.00415	0.161595	0.170074	0.173467	P value<0.0001
AJUBA	0.944216	1.03834	1.01998	5.60674	6.1357	6.06893	P value<0.0001
SAMD4A	0.929643	0.995834	1.08018	2.20367	2.19434	1.8071	P value=0.0015
NOCT	0.876332	1.02678	1.11136	1.89125	1.83079	2.04	P value<0.0001
WTIP	0.929213	1.05586	1.01925	2.09539	2.04787	2.1714	P value=0.0097
CTGF	0.981938	1.09638	0.928866	2.09644	2.29948	2.1628	P value=0.0001
