# Supplementary material for: YAP/TAZ enhances P-body formation to promote tumorigenesis
Source: eLife. 2024 Jul 24;12:RP88573. doi: 10.7554/eLife.88573 (PMC11268890; doi:10.7554/eLife.88573)
Supplement: Figure 3—figure supplement 1—source data 1. [file elife-88573-fig3-figsupp1-data1.xlsx]

## Sheet: Figure 3-Figure Supplement 1A
	pBABE-siNC			YAP5SA+siNC			YAP5SA+siSAMD4A-1			YAP5SA+siSAMD4A-2			YAP5SA+siSAMD4A-Mix			YAP5SA+siSAMD4A-Mix+siAJUBA
SAMD4A	1.08356	1.00642	0.916997	4.58446	4.93266	5.27934	2.03515	1.7821	1.57865	1.52737	1.41198	1.44916	0.962589	1.16562	1.22937	0.875646	0.760213	0.823017
	YAP5SA+siNC vs. pBABE-siNC P value<0.0001
	YAP5SA+siNC vs. YAP5SA+siSAMD4A-1 P value<0.0001
	YAP5SA+siNC vs. YAP5SA+siSAMD4A-2 P value<0.0001
	YAP5SA+siNC vs. YAP5SA+siSAMD4A-Mix P value<0.0001
	YAP5SA+siNC vs. YAP5SA+siSAMD4A-Mix+siAJUBA P value<0.0001

## Sheet: Figure 3-Figure Supplement 1B
	pBABE-siNC			YAP5SA+siNC			YAP5SA+siSAMD4A-Mix+siAJUBA			YAP5SA+siAJUBA
AJUBA	1.02379	1.00147	0.975331	3.37936	3.45516	3.44075	1.06075	1.03358	1.05851	1.27833	1.14675	1.12041
YAP5SA+siNC vs. pBABE-siNC P value<0.0001
YAP5SA+siNC vs. YAP5SA+siSAMD4A-Mix+siAJUBA P value<0.0001
YAP5SA+siNC vs. YAP5SA+siAJUBA P value<0.0001

## Sheet: Figure 3-Figure Supplement 1C
	pBABE+pQCHIX			YAP5SA+pQCHIX			YAP5SA+PNRC1			YAP5SA+PNRC1W300A
PNRC1	0.861949	0.844019	1.37457	0.402716	0.394595	0.353539	3.62693	3.90913	3.93253	4.88705	5.15041	5.40101
pBABE+pQCHIX vs. YAP5SA+pQCHIX P value=0.0164
pBABE+pQCHIX vs. YAP5SA+PNRC1 P value<0.0001
pBABE+pQCHIX vs. YAP5SA+PNRC1W300A P value<0.0001

## Sheet: Figure 3-Figure Supplement 1E
	pLKO			sh-YT1			sh-YT2			sh-YT1-si-PNRC1			sh-YT2-si-PNRC1
YAP	0.993715	1.01155	0.994834	0.491149	0.564399	0.48778	0.415645	0.406137	0.337551	0.367862	0.842512	0.524921	0.418406	0.440329	0.56239
TAZ	1.01887	0.975361	1.00627	0.556865	0.481897	0.522539	0.511265	0.489075	0.467726	0.626749	0.633169	0.651212	0.350676	0.344066	0.613523
PNRC1	1.00824	1.00981	0.982189	2.70488	2.75706	2.90543	2.56096	2.95194	2.5385	0.779243	0.695902	0.685503	0.74094	0.775777	0.808231
	pLKO vs. sh-YT1	pLKO vs. sh-YT2	pLKO vs. sh-YT1-si-PNRC1	pLKO vs. sh-YT2-si-PNRC1
YAP	P value=0.0016	P value=0.0003	P value=0.0044	P value=0.0009
TAZ	P value<0.0001	P value<0.0001	P value=0.0004	P value<0.0001
PNRC1	P value<0.0001	P value<0.0001	P value<0.0001	P value<0.0001

## Sheet: Figure 3-Figure Supplement 1F
NC	siYT1	siYT2	siYT1/siPNRC1	siYT2/siPNRC1
3	0	0	3	3		NC vs siYT1 P value<0.0001
4	0	0	4	4		NC vs siYT2 P value<0.0001
4	0	0	4	4		siYT1 vs siYT1+siPNRC1 P value<0.0001
4	0	0	4	4		siYT2 vs siYT2+siPNRC1 P value<0.0001
5	0	0	4	5
5	0	0	4	5
5	0	0	4	5
5	0	0	4	5
5	0	0	4	5
5	0	0	4	5
5	0	0	5	5
5	0	0	5	5
5	0	0	5	5
5	0	0	5	5
5	0	0	5	5
6	0	1	5	5
6	0	1	5	5
6	0	1	5	5
6	0	1	5	5
6	0	1	5	5
6	0	1	5	5
6	0	1	5	6
6	0	1	5	6
6	0	1	5	6
6	0	2	6	6
6	1	2	6	6
6	1	2	6	6
6	1	2	6	6
6	1	2	6	6
6	1	2	6	6
6	1	2	6	6
6	1	2	6	6
6	1	2	6	6
6	1	2	6	6
6	1	2	6	6
6	1	2	6	6
7	2	2	6	7
7	2	2	6	7
7	2	2	6	7
7	2	2	6	7
7	2	2	6	7
7	2	2	6	7
7	2	2	6	7
7	2	2	7	7
7	2	2	7	7
7	2	2	7	7
7	2	2	7	7
7	2	2	7	7
7	2	2	7	7
7	2	2	7	7
7	2	2	7	7
7	2	2	7	7
7	2	2	7	7
7	2	3	7	7
7	2	3	7	7
7	3	3	7	7
8	3	3	8	7
8	3	3	8	7
8	3	3	8	7
8	3	3	8	7
8	3	3	8	7
8	3	3	8	7
8	3	3	8	7
8	3	4	8	7
8	3	4	8	7
8	3	4	8	8
8	3	4	8	8
8	3	4	8	8
8	3	4	8	8
8	3	4	8	8
8	3	4	8	8
8	3	4	8	8
8	3	4	8	8
8	3	4	8	8
8	4	4	8	8
9	4	4	8	9
9	4	4	8	9
9	4	4	8	9
9	4	4	8	9
9	4	4	9	9
9	4	5	9	9
9	4	5	9	9
9	4	5	9	9
9	5	5	9	9
10	5	5	9	9
10	5	5	9	9
10	5	5	9	9
10	5	5	9	9
10	5	6	9	9
10	7	6	9	9
10	7	6	9	9
10	7	6	9	9
11	7	6	10	9
11	7	6	10	11
11	7	8	10	11
11	9	8	10	11
11	9	8	10	11
11	9	8	10	11
12	9	8	11	12
12	9	8	11	12
