# Supplementary material for: YAP/TAZ enhances P-body formation to promote tumorigenesis
Source: eLife. 2024 Jul 24;12:RP88573. doi: 10.7554/eLife.88573 (PMC11268890; doi:10.7554/eLife.88573)
Supplement: Figure 3—source data 1. [file elife-88573-fig3-data1.xlsx]

## Sheet: Firgure3A
pBABE-NC	NC	siSAMD4A-1	siSAMD4A-2	siSAMD4Amix	siAJUBA	siSAMD4Amix+siAJUAB	pBABE-NC vs YAP5SA-NC:P value<0.0001
0	2	0	0	0	0	0	YAP5SA-NC vs YAP5SA-siSAMD4A-1:P value<0.0001
0	2	0	0	0	0	0	YAP5SA-NC vs YAP5SA-siSAMD4A-2:P value<0.0001
0	3	0	0	0	0	0	YAP5SA-NC vs YAP5SA-siSAMD4A-Mix:P value<0.0001
0	4	0	0	0	0	0	YAP5SA-NC vs YAP5SA-siAJUBA:P value<0.0001
0	4	1	0	0	0	0	YAP5SA-NC vs YAP5SA-siSAMD4A-Mix++siAJUAB:P value<0.0001
0	5	1	0	0	0	0
1	5	1	0	0	0	0
1	5	1	0	0	0	0
1	5	1	0	0	0	0
1	6	1	0	0	0	0
1	6	1	0	0	0	0
1	6	1	1	0	0	0
1	6	2	1	0	0	0
1	6	2	1	0	0	0
1	7	2	1	0	0	0
1	7	2	1	0	0	0
1	7	2	1	0	0	0
1	7	2	1	0	0	0
1	7	3	1	0	0	0
1	7	3	1	0	0	0
1	7	3	1	0	0	0
1	7	3	1	0	0	1
1	7	3	1	0	0	1
2	7	3	2	1	0	1
2	7	3	2	1	0	1
2	7	3	2	1	0	1
2	7	3	2	1	0	1
2	7	3	2	1	0	1
2	7	3	2	1	1	1
2	7	3	2	1	1	1
2	7	3	2	1	1	1
2	7	3	2	1	1	2
2	7	3	3	1	1	2
2	7	3	3	1	1	2
2	8	3	3	1	1	2
2	8	3	3	1	1	2
2	8	3	3	1	1	2
2	8	3	3	1	1	2
2	8	3	3	1	2	2
2	8	3	3	1	2	2
2	8	3	3	1	2	2
2	8	3	3	1	2	2
2	8	3	3	1	2	2
2	8	3	3	1	2	2
2	8	3	3	1	2	2
2	8	3	3	2	2	2
2	8	3	3	2	3	2
2	8	3	3	2	3	2
2	8	3	3	2	3	2
2	8	3	3	2	3	2
2	8	3	3	2	3	2
2	8	3	3	2	3	2
2	8	3	3	2	3	2
2	8	3	3	2	3	2
2	8	3	3	2	3	2
2	8	3	4	2	3	2
2	8	3	4	2	3	2
3	9	3	4	2	3	2
3	9	3	4	2	3	2
3	9	3	4	2	3	2
3	9	3	4	2	3	3
3	9	3	4	2	3	3
3	9	3	4	2	3	3
3	9	3	4	2	3	3
3	9	3	4	2	3	3
3	9	3	4	2	3	3
3	9	4	4	2	3	3
3	9	4	4	2	3	3
3	9	4	4	2	3	3
3	9	4	4	3	3	3
3	9	4	4	3	3	3
3	9	4	4	3	3	3
3	9	4	4	3	3	3
3	9	4	4	3	3	3
3	10	4	4	3	3	3
3	10	6	4	3	3	3
4	10	6	5	3	3	3
4	10	7	5	3	3	3
4	10	7	5	3	3	3
4	10	8	6	3	3	3
4	10	8	6	3	4	3
4	10	8	6	3	4	3
4	10	8	6	3	4	5
4	10	8	7	3	4	5
4	10	8	7	3	4	5
4	10	9	7	3	5	5
4	10	9	7	5	5	5
4	10	9	7	5	5	5
4	10	9	7	5	5	5
4	10	10	8	8	5	5
5	10	10	8	9	5	5
5	10	10	8	10	5	5
6	10	10	8	11	6	6
6	11	10	8	11	6	6
7	12	11	8	11	6	7
7	12	11	9	12	6	7
8	12	11	9	12	7	8
9	13	11	9	13	9	8
10	15	12	10	13	10	9
12	16	13	10	14	10	10

## Sheet: Firgure3B
pBABE/pQCXIH	pQCXIH	PNRC1WT	PNRC1W300A		pBABE-pQCXIH vs YAP5SA-pQCXIH:P value<0.0001
1	4	0	3		YAP5SA-pQCXIH vs YAP5SA-PNRC1WT:P value<0.0001
1	6	0	5		YAP5SA-pQCXIH vs YAP5SA-PNRC1W300A:P value<0.0001
2	6	0	5
2	6	0	5
2	6	0	5
2	6	0	6
2	6	0	6
2	6	0	6
2	6	0	6
2	7	0	6
2	7	0	6
3	7	1	6
3	7	1	7
3	7	1	7
3	7	1	7
3	7	1	7
3	7	1	7
3	7	1	7
3	8	1	7
3	8	1	7
3	8	2	7
4	8	2	8
4	8	2	8
4	8	2	8
4	9	2	8
4	9	2	8
4	9	2	8
4	9	2	8
4	9	2	9
4	9	2	9
4	9	2	9
4	9	2	9
4	9	3	9
4	9	3	9
4	9	3	9
4	9	3	9
4	9	3	9
4	9	3	9
4	9	3	9
4	9	3	9
4	9	3	9
4	9	3	9
4	9	3	9
5	9	3	9
5	9	3	9
5	10	3	9
5	10	3	9
5	10	3	10
5	10	4	10
5	11	4	10
5	11	4	10
5	11	4	11
5	11	4	11
5	11	4	11
5	12	4	11
5	12	4	11
5	12	4	11
5	12	4	11
5	12	4	12
5	12	4	12
5	12	4	12
5	13	4	12
5	13	4	12
5	13	4	13
5	13	4	13
5	13	4	13
5	13	4	13
5	13	4	13
5	13	4	13
5	14	4	13
5	14	4	13
6	14	4	13
6	14	4	13
6	14	5	14
6	14	5	14
6	14	5	14
6	15	5	14
6	15	5	14
6	15	5	14
6	15	5	15
6	15	6	15
6	15	6	15
7	15	6	15
7	15	6	15
7	15	6	15
7	15	7	15
7	15	7	15
7	15	7	15
8	15	7	15
8	15	7	15
9	15	8	15
9	16	8	16
9	16	8	16
9	16	8	16
10	16	8	16
10	16	9	16
10	16	9	16
10	16	9	16
12	17	9	16
14	20	10	18
