# Supplementary material for: YAP/TAZ enhances P-body formation to promote tumorigenesis
Source: eLife. 2024 Jul 24;12:RP88573. doi: 10.7554/eLife.88573 (PMC11268890; doi:10.7554/eLife.88573)
Supplement: Figure 4—figure supplement 1—source data 1. [file elife-88573-fig4-figsupp1-data1.xlsx]

## Sheet: Figure 4-Figure Supplement 1A
	pLKO			shYT1			shYT2
YAP	1.0249	0.976869	0.998811	0.447245	0.488206	0.46829	0.557048	0.591612	0.579905
TAZ	1.03404	1.00387	0.963348	0.579621	0.557401	0.565939	0.506853	0.537513	0.503244
	YAP				TAZ
pLKO vs. shYT1 P value<0.0001				pLKO vs. shYT1 P value<0.0001
pLKO vs. shYT2 P value<0.0001				pLKO vs. shYT2 P value<0.0001

## Sheet: Figure 4-Figure Supplement 1B
	pBABE_anti-IgG			YAP5SA_anti-IgG			YAP5SAS94A_anti-IgG			pBABE_anti-FLAG			YAP5SA_anti-FLAG			YAP5SAS94A_anti-FLAG
PNRC1-Intron	0.03904	0.034001	0.058724	0.154946	0.200377	0.178233	0.136616	0.126225	0.142925	0.081766	0.086152	0.070956	4.82463	6.73892	6.55419	0.089888	0.08944	0.281538
PNRC1-Promoter	0.0450846	0.0541066	0.0909697	0.104469	0.0950156	0.0950156	0.170984	0.128805	0.156305	0.222262	0.201792	0.107005	2.99978	2.96893	2.67784	0.252507	0.206248	0.123649
PNRC1-Intron
YAP5SA_anti-FLAG vs. pBABE_anti-FLAG P value<0.0001
YAP5SA_anti-FLAG vs. YAP5SAS94A_anti-FLAG P value<0.0001
PNRC1-Promoter
YAP5SA_anti-FLAG vs. pBABE_anti-FLAG P value<0.0001
YAP5SA_anti-FLAG vs. YAP5SAS94A_anti-FLAG P value<0.0001

## Sheet: Figure 4-Figure Supplement 1C
	pLKO_anti-IgG			shTEAD1/3/4_anti-IgG			pLKO_anti-YAP			shTEAD1/3/4_anti-YAP				pLKO_anti-YAP vs. shTEAD1/3/4_anti-YAP
GAPDH	0.067606	0.052313	0.063079	0.074671	0.070643	0.049607	0.051951	0.076061	0.054913	0.069671	0.049607	0.067766		P value<0.0001
CTGF	0.026218	0.04114	0.039465	0.039282	0.045437	0.036906	2.09464	1.90092	1.95436	0.590496	0.562529	0.594604		P value<0.0001
PNRC1Intron	0.046392	0.046293	0.02176	0.05378	0.041	0.06293	1.6548	1.615	1.529	0.79392	0.75627	0.7374		P value<0.0001
PNRC1-promoter	0.045648	0.05065	0.027521	0.054788	0.036906	0.042394	1.65485	1.71321	1.54403	0.790041	0.742262	0.747425		P value<0.0001
AJUBA	0.045648	0.063228	0.037336	0.063667	0.05065	0.078384	1.51225	1.36292	1.46074	0.827425	0.856604	0.963729		P value<0.0001
SMAD4A	0.042297	0.034595	0.038652	0.045541	0.035239	0.049149	2.02329	2.00931	2.03736	0.675159	0.665864	0.728651		P value<0.0001
NOCT	0.036147	0.039555	0.043889	0.043486	0.042591	0.03812	1.27456	1.28343	1.31039	0.662825	0.649184	0.640247		P value<0.0001
WTIP	0.019777	0.016746	0.013048	0.013508	0.014478	0.016289	1.94531	1.51572	1.84038	0.460094	0.392292	0.517632		P value<0.0001

## Sheet: Figure 4-Figure Supplement 1D
	pBABE_anti-IgG			YAP5SA_anti-IgG			YAP5SAS94A_anti-IgG			pBABE_anti-CHD4			YAP5SA_anti-CHD4			YAP5SAS94A_anti-CHD4
GAPDH	0.028229	0.017619	0.011624	0.016308	0.009399	0.028295	0.013602	0.026461	0.013048	0.022302	0.024405	0.012633	0.017661	0.012316	0.017661	0.022406	0.021197	0.041521
CTGF	0.031034	0.017458	0.032577	0.034197	0.018326	0.015198	0.016631	0.006524	0.024181	0.105843	0.138696	0.118257	0.095391	0.069348	0.116629	0.115824	0.078563	0.099442
AJUBA	0.004374	0.00851	0.00327	0.00455	0.006045	0.005244	0.00568	0.018581	0.001228	0.09561	0.08152	0.103902	0.100134	0.097396	0.10083	0.129408	0.123279	0.096055
SMAD4A	0.023304	0.018032	0.015163	0.007205	0.008995	0.007564	0.011304	0.007406	0.012985	0.120466	0.137423	0.14227	0.121019	0.100363	0.088591	0.105331	0.120993	0.10104
NOCT	0.012662	0.009016	0.009205	0.013539	0.014919	0.013078	0.018495	0.014714	0.011705	0.124714	0.137423	0.116363	0.100363	0.097619	0.1137	0.077123	0.116896	0.09967
		YAP5SA_anti-CHD4 vs. pBABE_anti-CHD4					YAP5SA_anti-CHD4 vs. YAP5SAS94A_anti-CHD4
CTGF	P value=0.1787						P value=0.9966
AJUBA	P value=0.9078						P value=0.1708
SMAD4A	P value=0.2087						P value=0.9069
NOCT	P value=0.0680						P value=0.9138

## Sheet: Figure 4-Figure Supplement 1E
DDX6	NC	siCHD4		DCP1A	NC	siCHD4
NC vs siCHD4 P value<0.0001	0	0		NC vs siCHD4 P value<0.0001	1	0
	2	0			2	0
	2	0			2	0
	3	0			2	0
	3	0			3	1
	3	0			4	1
	3	1			4	1
	3	1			4	1
	4	1			4	1
	4	1			5	1
	4	1			5	1
	4	1			5	1
	4	1			5	1
	5	1			5	2
	5	1			5	2
	5	1			5	2
	5	1			6	2
	5	2			6	2
	5	2			6	2
	5	2			7	2
	5	2			7	2
	5	2			7	2
	5	2			7	2
	6	2			7	2
	6	2			7	2
	6	2			7	2
	6	2			7	2
	6	2			7	2
	6	2			7	2
	6	2			8	2
	6	3			8	2
	6	3			8	2
	6	3			8	2
	6	3			8	3
	6	3			8	3
	6	3			8	3
	7	3			8	3
	7	3			8	3
	7	3			8	3
	7	3			8	3
	7	3			8	3
	7	3			8	3
	7	3			8	3
	7	3			8	3
	7	3			8	3
	7	3			8	3
	7	3			8	3
	7	3			8	3
	7	3			8	3
	7	3			9	3
	7	3			9	3
	7	3			9	3
	7	3			9	3
	8	3			9	3
	8	3			9	3
	8	3			9	3
	8	3			9	4
	8	3			9	4
	8	3			9	4
	8	3			9	4
	8	4			9	4
	8	4			9	4
	8	4			9	4
	8	4			9	4
	8	4			9	4
	8	4			9	4
	8	4			9	4
	8	4			9	4
	8	4			9	4
	8	4			10	4
	9	4			10	4
	9	4			10	4
	9	4			10	4
	9	4			10	4
	9	4			10	4
	9	4			10	4
	9	4			10	4
	9	4			10	4
	9	4			10	4
	9	4			10	4
	9	4			10	4
	9	4			10	4
	10	4			10	4
	10	4			11	4
	10	4			11	4
	10	4			11	4
	10	5			11	4
	10	5			12	4
	10	5			12	5
	10	5			12	5
	10	5			12	5
	11	6			13	5
	11	6			13	6
	11	6			13	6
	12	6			16	6
	13	6			16	7
	15	7			17	7
	17	7			17	7
	17	7			18	7
	19	9			18	10
