# Supplementary material for: YAP/TAZ enhances P-body formation to promote tumorigenesis
Source: eLife. 2024 Jul 24;12:RP88573. doi: 10.7554/eLife.88573 (PMC11268890; doi:10.7554/eLife.88573)
Supplement: Figure 4—source data 1. [file elife-88573-fig4-data1.xlsx]

## Sheet: Figure 4A
Intro				Promoter
	PRK7	YAP5SA	YAP5SAS94A		PRK7	YAP5SA	YAP5SAS94A
	1.05311	0.405852	1.25226		1.02291	0.183913	0.935199
	0.980004	0.409131	1.20995		0.999733	0.184776	0.957218
	0.966887	0.431706	1.25572		0.977355	0.186916	0.90094
pRK7 vs YAP5SA:P value<0.0001				pRK7 vs YAP5SA:P value<0.0001
YAP5SA vs YAP5SAS94A:P value<0.0001				pRK7 vs YAP5SA:P value<0.0001
	pRK7			YAP5SA			YAP5SAS94A
PNRC1-intro	1.05311	0.980004	0.966887	0.405852	0.409131	0.431706	1.25226	1.20995	1.25572
	pRK7			YAP5SA			YAP5SAS94A
Ratio	1.18385	1.10167	1.08693	0.456239	0.459925	0.485303	1.40773	1.36017	1.41163
Firefly	11293381	11822045	12320692	12144559	12638515	12971256	17265482	17191002	16865864
Relina	9539502	10730981	11335333	26618844	27479502	26728144	12264792	12638871	11947831
	pRK7			YAP5SA			YAP5SAS94A
PNRC1-promoter	1.02291	0.999733	0.977355	0.183913	0.184776	0.186916	0.935199	0.957218	0.90094
	pRK7			YAP5SA			YAP5SAS94A
Ratio	0.758598	0.741409	0.724814	0.136391	0.137032	0.138618	0.69355	0.70988	0.668143
Firefly	5287210	6020109	6212420	2456358	2425730	2771225	6094788	6418254	6220419
Relina	6969710	8119821	8571059	18009654	17701984	19991756	8787813	9041328	9310005

## Sheet: Figure 4B
	pLKO			shYT1			shYT2
	A1	A2	A3	B1	B2	B3	C1	C2	C3
PNRC1-Intron	1.148	1	1.19	3.248	3.584	2.94	1.974	1.764	1.862
					P value=0.0004			P value=0.0008
	pLKO			shYT1			shYT2
	A1	A2	A3	B1	B2	B3	C1	C2	C3
Ratio	0.005	0.004	0.0047	0.0129	0.0143	0.1176	0.0079	0.0071	0.0075
Firefly	50531	418041	466740	2183034	2774642	23577373	1393189	1345324	141014
Relina	10106352	104510432	99306576	169227472	194030928	200487872	176353056	189482256	189468656
	pLKO			shYT1			shYT2
	A1	A2	A3	B1	B2	B3	C1	C2	C3
PNRC1-Promoter	1	0.9	1.1	4.9	5	5	2.6	2.6	3
					P value<0.0001			P value=0.0003
	pLKO			shYT1			shYT2
	A1	A2	A3	B1	B2	B3	C1	C2	C3
Ratio	0.012	0.011	0.0132	0.0588	0.06	0.06	0.0312	0.0312	0.036
Firefly	1430621	1407213	1587163	10002744	10466188	125626752	3847433	395874	456746
Relina	119218480	127928528	120239672	170114704	174436464	125626752	123315168	126877400	12687400

## Sheet: Figure 4C
	pRK7-IntronWT			pRK7-IntronMU			YAP5SA-IntronWT			YAP5SA-IntronMU
	A1	A2	A3	B1	B2	B3	C1	C2	C3	D1	D2	D3
PNRC1-Intron	1.0408	1	0.9796	1.6939	1.5918	1.5306	0.1224	0.0816	0.0816	2.2857	2.1837	2.2041
YAP5SA-IntronWT vs. pRK7-IntronWT P value =0.0003							YAP5SA-IntronMU vs. YAP5SA-IntronWT P value <0.0001
	pRK7-IntronWT			pRK7-IntronMU			YAP5SA-IntronWT			YAP5SA-IntronMU
	A1	A2	A3	B1	B2	B3	C1	C2	C3	D1	D2	D3
Ratio	0.0051	0.049	0.048	0.083	0.078	0.075	0.006	0.006	0.004	0.106	0.112	0.107
Firefly	1887717	1939155	1711213	8468353	8890022	8617559	107918	109851	71882	7455886	7822377	7302327
Relina	37217652	39720636	35482120	101707576	113815568	115239728	17516350	17742280	18065758	70109752	69637424	68037776
	pRK7-promoterWT			pRK7-promoterMU			YAP5SA-promoterWT			YAP5SA-promoterMU
	A1	A2	A3	B1	B2	B3	C1	C2	C3	D1	D2	D3
PNRC1-promoter	1.027	1.0401	0.946	1.5	1.5135	1.5135	0.135	0.1351	0.1353	2.3514	2.3243	2.3108
	YAP5SA-promoterWT vs. pRK7-promoterWT P value <0.0001						YAP5SA-promoterMU vs. YAP5SA-promoterWT
	pRK7-promoterWT			pRK7-promoterMU			YAP5SA-promoterWT			YAP5SA-promoterMU
	A1	A2	A3	B1	B2	B3	C1	C2	C3	D1	D2	D3
Ratio	0.28	0.286	0.275	0.425	0.375	0.375	0.031	0.042	0.032	0.733	0.817	0.63
Firefly	6513245	6469701	6126864	16290619	15451690	15747489	502961	693762	520076	41738896	46035524	34624300
Relina	23226206	22644070	22245184	38371500	41248284	41983132	16336093	16347437	16484309	56947092	56319360	54960620

## Sheet: Figure 4D
		PNRC1-promoter			PNRC1-promoter-mutant
	pLKO	0.997664	1.07151	0.930822	1.22443	1.4424	1.45082
	shYT1	2.66019	2.51863	2.60844	1.24239	1.17028	1.21049	P value=0.0005
	shYT2	3.24275	3.20119	3.26217	1.15186	1.15817	1.18996	P value<0.0001
		PNRC1-intro			PNRC1-intro-mutant
	pLKO	1.02922	1.00642	0.964363	1.3827	1.35802	1.51315
	shYT1	2.87791	2.72362	2.35181	1.43067	1.25216	1.10097	P value=0.0005
	shYT2	2.39194	2.45732	2.65008	1.05528	0.970663	0.954171	P value<0.0001
		pLKO			shYT1			shYT2
	PNRC1-promoter	0.997664	1.07151	0.930822	2.66019	2.51863	2.60844	3.24275	3.20119	3.26217
	PNRC1-promoter-mutant	1.22443	1.4424	1.45082	1.24239	1.17028	1.21049	1.15186	1.15817	1.18996
	PNRC1-promoter
	Ratio	0.0687329	0.0672101	0.0644016	0.192192	0.181888	0.157057	0.159737	0.164103	0.176976
	Firefly	514523	532315	541592	54971	53163	48812	35478	38582	40492
	Relina	7485833	7920162	8409601	286022	292285	310791	222102	235108	228799
	PNRC1-promoter-mutant
	Ratio	0.0923389	0.0906904	0.10105	0.0955424	0.0836212	0.0735245	0.0704731	0.0648224	0.063721
	Firefly	711150	680580	739624	39099	38007	36551	53661	49014	51912
	Relina	7701525	7504435	7319351	409232	454514	497127	761439	756128	814676
		pLKO			shYT1			shYT2
	PNRC1-intro	1.02922	1.00642	0.964363	2.87791	2.72362	2.35181	2.39194	2.45732	2.65008
	PNRC1-intro-mutant	1.3827	1.35802	1.51315	1.43067	1.25216	1.10097	1.05528	0.970663	0.954171
	PNRC1-intro
	Ratio	0.00290871	0.00312402	0.00271383	0.00775584	0.00734313	0.00760495	0.00945431	0.00933313	0.00951092
	Firefly	45276	53164	50396	282842	313247	293227	382765	376999	384074
	Relina	15565663	17017800	18570058	36468268	42658532	38557404	40485788	40393644	40382436
	PNRC1-intro-mutant
	Ratio	0.00356985	0.00420535	0.0042299	0.00362221	0.00341198	0.0035292	0.00335826	0.00337668	0.00346935
	Firefly	64010	77559	79362	60122	55407	54365	73384	73479	73934
	Relina	17930710	18442934	18762138	16598157	16238940	15404338	21851814	21760754	21310624

## Sheet: Figure 4E
	pBABE_anti-IgG			YAP5SA_anti-IgG			YAP5SA-S94A_anti-IgG			pBABE_anti-CHD4			YAP5SA_anti-CHD4			YAP5SA-S94A_anti-CHD4
GAPDH	0.028229	0.017619	0.011624	0.016308	0.009399	0.028295	0.013602	0.026461	0.013048	0.022302	0.024405	0.012633	0.017661	0.012316	0.017661	0.022406	0.021197	0.041521
PNRC1-Intron	0.143242	0.181309	0.129995	0.0971611	0.0938515	0.0677574	0.379768	0.465394	0.36514	1.30724	1.18634	1.01855	3.72315	3.77512	3.93543	1.33471	1.20291	1.04719
PNRC1-Promoter	0.130597	0.179641	0.1177	0.119068	0.109565	0.102939	0.0767613	0.0958235	0.0938515	1.34089	1.20848	1.14329	4.75635	5.35118	4.78944	1.1539	1.06181	1.06181
PNRC1-Intron	pBABE vs pBABE-YAP5SA:P value<0.0001
	pBABE-YAP5SA vs pBABE-YAP5SAS94A:P value<0.0001
PNRC1-Promoter	pBABE vs pBABE-YAP5SA:P value<0.0001
	pBABE-YAP5SA vs pBABE-YAP5SAS94A:P value<0.0001

## Sheet: Figure 4F
		NC			siCHD4
	CHD4	0.984093	1.00422	1.01189	0.258192	0.288051	0.274038	P value<0.0001
	PNRC1	1.00438	0.941542	1.05746	4.56865	5.74766	5.52506	P value=0.0003
		NC			siRBBP4
	RBBP4	0.997699	1.01107	0.991335	0.521477	0.540799	0.519061	P value<0.0001
	PNRC1	1.00438	0.941542	1.05746	5.30858	6.89949	6.48512	P value=0.0004
