# Supplementary material for: YAP/TAZ enhances P-body formation to promote tumorigenesis
Source: eLife. 2024 Jul 24;12:RP88573. doi: 10.7554/eLife.88573 (PMC11268890; doi:10.7554/eLife.88573)
Supplement: Figure 5—figure supplement 1—source data 1. [file elife-88573-fig5-figsupp1-data1.xlsx]

## Sheet: Figure 5-Figure Supplement 1B
N	T
1	0.957	N vs T P value=0.0023
0.824	0.528
1.953	1.566
2.037	0.931
1.234	0.64
3.204	0.663
1.435	0.608
1.318	1.212
2.016	0.104
0.605	0.943
1.2	0.465
0.675	0.31
0.879	0.168
0.994	0.749
1.38	0.392
1	0.873

## Sheet: Figure 5-Figure Supplement 1C
	pBABE/pQCHIX			YAP5SA/pQCHIX			YAP5SA/PNRC1			YAP5SA/PNRC1W300A
cell number(%)	100	146.667	80	6.66667	10	3.33333	600	666.667	550	400	513.333	300
pBABE/pQCHIX vs YAP5SA/pQCHIX P value=0.0067
YAP5SA/PNRC1 vs YAP5SA/pQCHIX P value=0.0030
YAP5SA/PNRC1W300A vs YAP5SA/pQCHIX P value<0.0001

## Sheet: Figure 5-Figure Supplement 1D
days	pLKO				shYT1				shYT2				shYT1-siPNRC1				shYT2-siPNRC1
1	0.06	0.066	0.065	0.059	0.04	0.057	0.061	0.058	0.042	0.052	0.047	0.041	0.055	0.07	0.066	0.077	0.076	0.078	0.082	0.075
2	0.117	0.111	0.087	0.134	0.101	0.097	0.102	0.113	0.081	0.08	0.082	0.1	0.12	0.142	0.175	0.126	0.184	0.185	0.166	0.186
3	0.292	0.286	0.229	0.286	0.165	0.225	0.199	0.232	0.15	0.162	0.22	0.226	0.231	0.258	0.27	0.268	0.351	0.359	0.389	0.398
4	0.576	0.504	0.481	0.581	0.279	0.272	0.294	0.275	0.282	0.275	0.251	0.334	0.601	0.649	0.593	0.541	0.656	0.706	0.689	0.753
5	0.755	1.05	0.824	0.957	0.478	0.379	0.475	0.494	0.387	0.409	0.456	0.355	0.859	0.843	0.833	0.838	0.974	0.949	0.954	1.004
	pLKO vs shYT1 P value=0.0007
	pLKO vs shYT1 P value=0.0007
	shYT1 vs shYT1-PNRC1 P value<0.0001
	shYT2 vs shYT2-PNRC1 P value<0.0001

## Sheet: Figure 5-Figure Supplement 1E
	pLKO			shYT1			shYT2			shYT1-si-PNRC1			shYT2-si-PNRC1
cell number(%)	92	103.2	102.1	23.14	25.64	32.45	23.65	25.14	21.35	102.31	103.21	98.98	98.9	85.56	103.21
	pLKO vs shYT1 P value<0.0001
	pLKO vs shYT2 P value<0.0001
	shYT1 vs shYT1-PNRC1 P value<0.0001
	shYT2 vs shYT2-PNRC1 P value=0.0002
