# Supplementary material for: YAP/TAZ enhances P-body formation to promote tumorigenesis
Source: eLife. 2024 Jul 24;12:RP88573. doi: 10.7554/eLife.88573 (PMC11268890; doi:10.7554/eLife.88573)
Supplement: Figure 5—source data 1. [file elife-88573-fig5-data1.xlsx]

## Sheet: Figure 5A
DAYS	pBABE+pQCHIX				YAP5SA+pQCHIX				YAP5SA+PNRC1				YAP5SA+PNRC1W300A
1	0.016	0.016	0.022	0.02	0.012	0.014	0.026	0.033	0.023	0.019	0.018	0.016	0.026	0.024	0.023	0.032
2	0.044	0.043	0.045	0.04	0.063	0.075	0.079	0.084	0.026	0.032	0.036	0.029	0.058	0.047	0.058	0.041
3	0.1055	0.1175	0.0965	0.0995	0.1665	0.1885	0.2025	0.2395	0.1185	0.1205	0.0905	0.1075	0.1465	0.1715	0.1455	0.1495
4	0.273	0.289	0.272	0.3	0.45	0.498	0.491	0.491	0.277	0.316	0.264	0.249	0.407	0.455	0.382	0.447
5	0.6175	0.6445	0.6285	0.5765	1.0645	1.2035	1.0955	1.0735	0.4865	0.5935	0.4885	0.5625	0.9845	0.9725	0.9195	1.0265
	pBABE+pQCHIX vs YAP5SA+pQCHIX:P value<0.0001
	YAP5SA+pQCHIX vs YAP5SA +PNRC1WT:P value<0.0001
	pBABE+pQCHIX vs YAP5SA +PNRC1WT:P value<0.0001

## Sheet: Figure 5B
	pBABE+pQCXIH			YAP5SA+pQCXIH			YAP5SA+PNRC1			YAP5SA+PNRC1W300A
cell number(%)	100	97.0588	102.941	324.51	317.647	331.373	73.5294	71.5686	75.4902	270.588	260.784	280.392
pBABE+pQCHIX vs YAP5SA+pQCHIX:P value<0.0001
YAP5SA+pQCHIX vs YAP5SA +PNRC1WT:P value<0.0001
YAP5SA+pQCHIX vs YAP5SA +PNRC1W300A:P value<0.0001

## Sheet: Figure 5C
	pBABE+pQCXIH			YAP5SA+pQCXIH			YAP5SA+PNRC1			YAP5SA+PNRC1W300A
Relative cell migration(%)	100	103.093	98.2818	404.639	427.148	396.564	129.897	144.502	130.412	349.656	375.086	340.722
pBABE+pQCHIX vs YAP5SA+pQCHIX:P value<0.0001
YAP5SA+pQCHIX vs YAP5SA +PNRC1WT:P value<0.0001
YAP5SA+pQCHIX vs YAP5SA +PNRC1W300A:P value<0.0001

## Sheet: Figure 5D
pBABE/pQCHIX	YAP5SA/pQCHIX	YAP5SA/PNRC1	YAP5SA/PNRC1W300A
0.04	0.37	0.04	0.35
0.06	0.35	0.03	0.22
0.04	0.33	0.09	0.39
0.04	0.19	0.05	0.53
0.03	0.17	0.04	0.27
0.02	0.23	0	0.22
pBABE+pQCHIX vs YAP5SA+pQCHIX:P value<0.0001
YAP5SA+pQCHIX vs YAP5SA +PNRC1WT:P value=0.0001
YAP5SA+pQCHIX vs YAP5SA +PNRC1W300A:P value=0.0002

## Sheet: Figure 5E
	pBABE/pQCHIX			YAP5SA/pQCHIX			YAP5SA/PNRC1			YAP5SA/PNRC1W300A
Relative number of Ki67+ cells	100	109.375	93.75	321.875	328.125	309.375	65.625	78.125	50	281.25	309.375	278.125
pBABE+pQCHIX vs YAP5SA+pQCHIX:P value<0.0001
YAP5SA+pQCHIX vs YAP5SA +PNRC1WT:P value<0.0001
YAP5SA+pQCHIX vs YAP5SA +PNRC1W300A:P value<0.0001
