# Supplementary material for: YAP/TAZ enhances P-body formation to promote tumorigenesis
Source: eLife. 2024 Jul 24;12:RP88573. doi: 10.7554/eLife.88573 (PMC11268890; doi:10.7554/eLife.88573)
Supplement: Figure 6—figure supplement 1—source data 1. [file elife-88573-fig6-figsupp1-data1.xlsx]

## Sheet: Figure 6-Figure Supplement 1A
	pBABE+pLKO			YAP5SA+pLKO			YAP5SA+DCP1Ash1			YAP5SA+DCP1Ash2			YAP5SA+DCP1Ash3			YAP5SA+DCP1Ash4
DCP1A	1.05335	0.96241	0.986433	0.819807	0.809386	0.791459	0.199834	0.195307	0.188616	0.429014	0.426577	0.426597	0.0945082	0.096301	0.0949187	0.109726	0.109258	0.109371
	pBABE+pLKO vs YAP5SA+pLKO P value<0.0001
	YAP5SA+DCP1Ash1 vs YAP5SA+pLKO P value<0.0001
	YAP5SA+DCP1Ash2 vs YAP5SA+pLKO P value<0.0001
	YAP5SA+DCP1Ash2 vs YAP5SA+pLKO P value<0.0001
	YAP5SA+DCP1Ash4 vs YAP5SA+pLKO P value<0.0001
	pBABE+pLKO			YAP5SA+pLKO			YAP5SA+LSM14Ash1			YAP5SA+LSM14Ash2
LSM14A	1.03236	0.962207	1.0067	0.927693	0.945345	0.942934	0.29135	0.289429	0.39969	0.367731	0.489289	0.525912
	pBABE+pLKO vs YAP5SA+pLKO P value<0.0001
	YAP5SA+LSM14Ash1 vs YAP5SA+pLKO P value<0.0001
	YAP5SA+LSM14Ash2 vs YAP5SA+pLKO P value<0.0001
	pBABE+pLKO			YAP5SA+pLKO			YAP5SA+DDX6sh1			YAP5SA+DDX6sh2
DDX6	1.16424	0.888729	0.966471	0.848443	0.865081	0.906402	0.101866	0.100581	0.089928	0.539198	0.474059	0.380963
	pBABE+pLKO vs YAP5SA+pLKO P value<0.0001
	YAP5SA+DDX6sh1 vs YAP5SA+pLKO P value<0.0001
	YAP5SA+DDX6sh2 vs YAP5SA+pLKO P value<0.0001

## Sheet: Figure 6-Figure Supplement 1B
DCP1A													DDX6
	pBABE-pLKO	pLKO	sh1	sh2	sh2	sh4	sh1	sh2	sh1	sh2				pBABE-pLKO	pLKO	sh1	sh2	sh2	sh4	sh1	sh2	sh1	sh2
pLKO vs YAP5SA P value <0.0001	0	2	0	0	0	0	0	0	0	0			pLKO vs YAP5SA P value <0.0001	0	2	0	0	0	0	0	0	0	0
YAP5SA -DCP1Ash1 vs YAP5SA P value <0.0001	0	2	0	0	0	0	0	0	0	0			YAP5SA -DCP1Ash1 vs YAP5SA P value <0.0001	0	2	0	0	0	0	0	0	0	0
YAP5SA -DCP1Ash2 vs YAP5SA P value <0.0001	0	3	0	0	0	0	0	0	0	0			YAP5SA -DCP1Ash2 vs YAP5SA P value <0.0001	0	3	0	0	0	0	0	0	0	0
YAP5SA -DCP1Ash3 vs YAP5SA P value <0.0001	0	4	0	0	0	0	0	0	0	0			YAP5SA -DCP1Ash3 vs YAP5SA P value <0.0001	0	4	0	0	0	0	0	0	0	0
YAP5SA -DCP1Ash4 vs YAP5SA P value <0.0001	0	4	0	0	0	0	0	0	0	0			YAP5SA -DCP1Ash4 vs YAP5SA P value <0.0001	0	4	0	0	0	0	0	0	0	0
YAP5SA -LSM14Ash1 vs YAP5SA P value <0.0001	0	5	0	0	0	0	0	0	0	0			YAP5SA -LSM14Ash1 vs YAP5SA P value <0.0001	0	5	0	0	0	0	0	0	0	0
YAP5SA -LSM14Ash2 vs YAP5SA P value <0.0001	1	5	0	0	0	0	0	0	0	0			YAP5SA -LSM14Ash2 vs YAP5SA P value <0.0001	1	5	0	0	0	0	0	0	0	0
YAP5SA -DDX6sh1 vs YAP5SA P value <0.0001	1	5	0	0	0	0	0	0	0	0			YAP5SA -DDX6sh1 vs YAP5SA P value <0.0001	1	5	0	0	0	0	0	0	0	0
YAP5SA -DDX6sh2 vs YAP5SA P value <0.0001	1	5	0	0	0	0	0	0	0	0			YAP5SA -DDX6sh2 vs YAP5SA P value <0.0001	1	5	0	0	0	0	0	0	0	0
	1	6	0	0	0	0	0	0	0	0				1	6	0	0	0	0	0	0	0	0
	1	6	0	0	0	0	0	0	0	0				1	6	0	0	0	0	0	0	0	0
	1	6	0	0	0	0	0	0	0	0				1	6	0	0	0	0	0	0	0	0
	1	6	0	0	0	0	0	0	0	0				1	6	0	0	0	0	0	0	0	0
	1	6	0	0	0	0	0	0	0	0				1	6	0	0	0	0	0	0	0	0
	1	7	0	0	0	0	0	0	0	0				1	7	0	0	0	0	0	0	0	0
	1	7	0	0	0	0	0	0	0	0				1	7	0	0	0	0	0	0	0	0
	1	7	0	0	0	0	0	0	0	0				1	7	0	0	0	0	0	0	0	0
	1	7	0	0	0	0	0	0	0	0				1	7	0	0	0	0	0	0	0	0
	1	7	0	0	0	0	0	0	0	0				1	7	0	0	0	0	0	0	0	0
	1	7	0	0	0	0	0	0	0	0				1	7	0	0	0	0	0	0	0	0
	1	7	0	0	0	0	0	0	0	0				1	7	0	0	0	0	0	0	0	0
	1	7	0	0	0	0	1	0	0	0				1	7	0	0	0	0	1	0	0	0
	1	7	0	0	0	0	1	0	0	0				1	7	0	0	0	0	1	0	0	0
	2	7	0	0	1	0	1	0	0	0				2	7	0	0	1	0	1	0	0	0
	2	7	0	0	1	0	1	0	0	0				2	7	0	0	1	0	1	0	0	0
	2	7	0	0	1	0	1	0	0	0				2	7	0	0	1	0	1	0	0	0
	2	7	0	0	1	0	1	0	0	0				2	7	0	0	1	0	1	0	0	0
	2	7	0	0	1	0	1	0	0	0				2	7	0	0	1	0	1	0	0	0
	2	7	0	0	1	0	1	0	0	0				2	7	0	0	1	0	1	0	0	0
	2	7	0	0	1	0	1	0	0	0				2	7	0	0	1	0	1	0	0	0
	2	7	0	0	1	0	1	0	0	0				2	7	0	0	1	0	1	0	0	0
	2	7	0	0	1	0	1	0	0	0				2	7	0	0	1	0	1	0	0	0
	2	7	0	0	1	0	1	0	0	0				2	7	0	0	1	0	1	0	0	1
	2	7	0	0	1	0	1	0	0	0				2	7	0	0	1	0	1	0	0	1
	2	8	0	0	1	0	1	0	0	0				2	8	0	0	1	0	1	0	0	1
	2	8	0	0	1	0	1	0	0	0				2	8	0	0	1	0	1	0	0	1
	2	8	0	0	1	0	1	0	0	0				2	8	0	0	1	0	1	0	0	1
	2	8	0	0	1	0	1	0	0	0				2	8	0	0	1	0	1	0	0	1
	2	8	0	0	1	0	1	0	0	1				2	8	0	0	1	0	1	0	0	1
	2	8	0	1	1	0	1	0	0	1				2	8	0	1	1	0	1	0	0	1
	2	8	0	1	1	0	1	0	0	1				2	8	0	1	1	0	1	0	0	1
	2	8	0	1	1	0	1	0	0	1				2	8	0	1	1	0	1	0	0	1
	2	8	0	1	1	0	1	0	0	1				2	8	0	1	1	0	1	0	0	1
	2	8	0	1	1	0	1	0	0	1				2	8	0	1	1	0	1	0	0	1
	2	8	0	1	1	0	1	0	0	1				2	8	0	1	1	0	1	0	0	1
	2	8	0	1	1	0	1	0	0	1				2	8	0	1	1	0	1	0	0	1
	2	8	0	1	1	0	1	0	0	1				2	8	0	1	1	0	1	0	0	1
	2	8	0	1	1	0	1	0	0	1				2	8	0	1	1	0	1	0	0	1
	2	8	0	1	1	0	1	1	0	1				2	8	0	1	1	0	1	1	0	1
	2	8	0	1	1	0	1	1	0	1				2	8	0	1	1	0	1	1	0	1
	2	8	0	1	1	0	1	1	0	1				2	8	0	1	1	0	1	1	0	1
	2	8	0	1	1	0	1	1	0	1				2	8	0	1	1	0	1	1	0	1
	2	8	0	1	1	0	1	1	0	1				3	8	0	1	1	0	1	1	0	1
	2	8	0	1	1	0	1	1	0	1				3	8	0	1	1	0	1	1	0	1
	2	8	0	1	1	0	1	1	0	1				3	8	0	1	1	0	1	1	0	1
	2	8	0	1	1	0	1	1	0	1				3	8	0	1	1	0	1	1	0	1
	2	8	0	1	1	0	1	1	0	2				3	8	0	1	1	0	1	1	0	2
	3	9	0	1	1	0	1	1	1	2				3	9	0	1	1	0	1	1	1	2
	3	9	0	1	1	0	1	1	1	2				3	9	0	1	1	0	1	1	1	2
	3	9	0	1	1	0	1	1	1	2				3	9	0	1	1	0	1	1	1	2
	3	9	0	1	1	0	1	1	1	2				3	9	0	1	1	0	1	1	1	2
	3	9	0	1	1	0	1	1	1	2				3	9	0	1	1	0	1	1	1	2
	3	9	0	1	1	0	1	1	1	2				3	9	0	1	1	0	1	1	1	2
	3	9	0	1	1	0	1	1	1	2				3	9	0	1	1	0	1	1	1	2
	3	9	0	1	1	0	1	1	1	2				3	9	0	1	1	0	1	1	1	2
	3	9	0	1	1	0	1	1	1	2				3	9	0	1	1	0	1	1	1	2
	3	9	0	1	1	0	1	2	1	2				3	9	0	1	1	0	1	2	1	2
	3	9	0	1	2	0	1	2	1	2				3	9	0	1	1	0	1	2	1	2
	3	9	0	1	2	0	1	2	1	2				3	10	0	1	1	0	1	2	1	2
	3	9	0	1	2	0	2	2	1	2				3	10	0	1	1	0	1	2	1	2
	3	9	1	1	2	0	2	2	1	2				3	10	0	2	1	0	1	2	1	2
	3	9	1	1	2	0	2	2	1	2				4	10	0	2	1	0	1	2	1	2
	3	9	1	1	2	0	2	2	1	2				4	10	0	2	1	0	1	2	1	2
	3	9	1	1	2	0	2	2	1	2				4	10	0	2	1	0	1	2	1	2
	3	10	1	1	2	0	2	2	1	2				4	10	0	2	1	0	11	2	1	2
	3	10	1	1	2	0	2	2	1	2				4	10	0	2	2	0	1	2	1	2
	4	10	1	1	2	0	2	2	1	2				4	10	0	2	2	0	2	2	1	2
	4	10	1	1	2	0	2	2	1	2				4	10	0	2	2	0	2	2	1	2
	4	10	1	2	2	0	2	2	1	2				4	10	1	2	2	0	2	2	1	2
	4	10	1	2	2	0	2	2	1	2				4	10	1	2	2	1	2	2	1	2
	4	10	1	2	2	0	2	2	1	2				4	10	1	2	2	1	2	2	1	2
	4	10	1	2	2	0	2	2	1	2				4	10	1	2	2	1	2	2	1	2
	4	10	1	2	2	0	2	2	1	2				4	10	1	2	2	1	2	2	1	2
	4	10	1	2	2	0	2	2	2	2				4	10	1	2	2	1	2	2	2	2
	4	10	1	2	2	1	2	2	2	2				4	10	1	2	2	1	2	2	2	2
	4	10	1	2	2	1	2	2	2	3				4	10	1	2	2	1	2	3	2	3
	4	10	1	2	2	1	2	2	2	3				4	10	1	2	2	1	2	3	2	3
	4	10	1	2	2	1	2	2	2	3				5	10	1	2	2	1	2	3	2	3
	4	10	1	2	2	1	2	2	2	3				5	10	1	2	2	1	2	3	2	3
	4	10	1	2	2	1	2	2	2	3				5	10	1	2	2	1	2	3	2	3
	5	10	1	2	2	1	2	2	2	3				5	11	1	2	2	1	2	3	2	3
	5	10	1	2	2	1	2	2	2	3				5	11	1	2	2	1	2	3	2	3
	6	10	1	2	2	1	2	3	2	3				6	11	1	2	2	1	2	3	2	3
	6	11	1	2	2	1	2	3	2	3				6	13	1	2	2	1	2	3	2	3
	7	12	1	2	3	1	2	3	2	3				7	12	1	2	3	1	2	3	2	3
	7	12	2	2	3	1	2	3	2	3				7	13	2	2	3	1	2	3	3	3
	8	12	2	2	4	2	2	3	2	3				8	14	2	2	4	2	2	3	3	4
	9	13	2	4	4	2	3	3	2	4				9	14	2	4	4	2	3	3	3	4
	10	15	3	5	4	2	3	3	2	4				9	14	3	5	4	2	3	3	3	6
	12	16	5	7	4	2	3	3	2	5				9	16	5	7	4	2	3	3	3	7
