# Supplementary material for: YAP/TAZ enhances P-body formation to promote tumorigenesis
Source: eLife. 2024 Jul 24;12:RP88573. doi: 10.7554/eLife.88573 (PMC11268890; doi:10.7554/eLife.88573)
Supplement: Figure 6—figure supplement 2—source data 1. [file elife-88573-fig6-figsupp2-data1.xlsx]

## Sheet: Figure 6-Figure Supplement 2A
	pBABE-pLKO			pBABE-DCP1Ash1			pBABE-DCP1Ash2			pBABE-DCP1Ash3			pBABE-DCP1Ash4			YAP5SA-pLKO			YAP5SA-DCP1Ash1			YAP5SA-DCP1Ash2			YAP5SA-DCP1Ash3			YAP5SA-DCP1Ash4
YAP	1.07694	1.03386	0.898146	1.38135	1.31741	1.24095	1.27565	1.28894	1.3642	1.24691	1.16499	1.13735	1.21335	1.35531	1.37712	5.1077	5.16093	5.11739	4.78776	3.66395	4.70148	4.97939	4.3471	4.6765	5.76055	5.44159	5.18232	4.67442	4.67729	4.70024
DCP1A	0.967371	1.00856	1.02496	0.414096	0.49453	0.436049	0.346371	0.330725	0.33654	0.240334	0.240681	0.232567	0.303564	0.288526	0.254711	0.739649	0.740698	0.762991	0.357943	0.336321	0.347468	0.13943	0.135563	0.159131	0.199774	0.172984	0.185672	0.168358	0.166102	0.163389
		YAP
pBABE-pLKO vs YAP5SA-pLKO P value<0.0001
		DCP1A
pBABE-DCP1Ash1 vs pBABE-pLKO P value<0.0001
pBABE-DCP1Ash2 vs pBABE-pLKO P value<0.0001
pBABE-DCP1Ash3 vs pBABE-pLKO P value<0.0001
pBABE-DCP1Ash4 vs pBABE-pLKO P value<0.0001
YAP5SA-DCP1Ash1 vs YAP5SA-pLKO P value<0.0001
YAP5SA-DCP1Ash2 vs YAP5SA-pLKO P value<0.0001
YAP5SA-DCP1Ash3 vs YAP5SA-pLKO P value<0.0001
YAP5SA-DCP1Ash4 vs YAP5SA-pLKO P value<0.0001

## Sheet: Figure 6-Figure Supplement 2B
	pBABE-pLKO			pBABE-DDX6sh1			pBABE-DDX6sh2			pBABE-DDX6sh3			YAP5SA-pLKO			YAP5SA-DDX6sh1			YAP5SA-DDX6sh2			YAP5SA-DDX6sh3
YAP	1.01097	1.00203	0.987142	1.256	1.2236	1.22185	1.29737	1.37204	1.39115	1.1057	1.16033	1.09625	5.49766	5.20836	5.38807	4.23425	4.53586	4.39817	4.06748	4.14249	4.12057	4.12057	3.93029	4.21685
DDX6	1.03962	0.91514	1.05108	0.129539	0.157832	0.227413	0.524775	0.463478	0.477625	0.132838	0.137862	0.1269	1.12624	1.31703	1.19783	0.210918	0.394551	0.130999	0.550503	0.524798	0.413286	0.0959249	0.115244	0.194821
		YAP
pBABE-pLKO vs YAP5SA-pLKO P value<0.0001
		DDX6
pBABE-DDX6sh1 vs pBABE-pLKO P value<0.0001
pBABE-DDX6sh2 vs pBABE-pLKO P value<0.0001
pBABE-DDX6sh3 vs pBABE-pLKO P value<0.0001
YAP5SA-DDX6sh1 vs YAP5SA-pLKO P value<0.0001
YAP5SA-DDX6sh2 vs YAP5SA-pLKO P value<0.0001
YAP5SA-DDX6sh3 vs YAP5SA-pLKO P value<0.0001

## Sheet: Figure 6-Figure Supplement 2C
	pBABE-pLKO			pBABE-LSM14Ash1			pBABE-LSM14Ash2			YAP5SA-pLKO			YAP5SA-LSM14Ash1			YAP5SA-LSM14Ash1
YAP	1.05723	0.996903	0.948802	1.19629	1.16127	1.12647	1.14515	1.0846	1.08496	5.13121	5.42642	4.85134	6.3931	6.06221	6.118	4.74774	4.24088	4.62652
LSM14A	0.985408	0.976386	1.03935	0.20438	0.170762	0.179827	0.530245	0.56209	0.538521	0.732465	0.739089	0.783165	0.207611	0.198149	0.193588	0.434462	0.33331	0.506377
		YAP
pBABE-pLKO vs YAP5SA-pLKO P value<0.0001
		LSM14A
pBABE-LSM14Ash1 vs pBABE-pLKO P value<0.0001
pBABE-LSM14Ash2 vs pBABE-pLKO P value<0.0001
YAP5SA-LSM14Ash1 vs YAP5SA-pLKO P value<0.0001
YAP5SA-LSM14Ash2 vs YAP5SA-pLKO P value<0.0001
