# Supplementary material for: YAP/TAZ enhances P-body formation to promote tumorigenesis
Source: eLife. 2024 Jul 24;12:RP88573. doi: 10.7554/eLife.88573 (PMC11268890; doi:10.7554/eLife.88573)
Supplement: Figure 6—figure supplement 3—source data 1. [file elife-88573-fig6-figsupp3-data1.xlsx]

## Sheet: Figure 6-Figure Supplement 3A
pBABE-pLKO	pBABE-DCP1Ash1	pBABE-DCP1Ash2	pBABE-DCP1Ash3	pBABE-DCP1Ash4	pBABE-DDX6sh1	pBABE-DDX6sh2	pBABE-DDX6sh3	pBABE-LSM14Ash1	pBABE-LSM14Ash2	YAP5SA-pLKO	YAP5SA-DCP1Ash1	YAP5SA-DCP1Ash2	YAP5SA-DCP1Ash3	YAP5SA-DCP1Ash4	YAP5SA-DDX6sh1	YAP5SA-DDX6sh2	YAP5SA-DDX6sh3	YAP5SA-LSM14Ash1	YAP5SA-LSM14Ash2
8.83	16.2	12.58	13.24	14.44	20.62	16.3	10.27	9.27	25.2	7.09	16.63	20.76	17.37	27.5	14.06	10.8	18.54	17.72	22.9

## Sheet: Figure 6-Figure Supplement 3B
	Cell Cycle	G0/G1	S	G2/M
Cell Type
pBABE-pLKO		80.7184	8.13377	11.1478
pBABE-DCP1Ash1		86.3822	6.13272	7.48506
pBABE-DCP1Ash2		88.323	6.37119	5.30577
pBABE-DCP1Ash3		88.226	5.94498	5.82903
pBABE-DCP1Ash4		88.4518	6.17375	5.37442
pBABE-DDX6sh1		86.4295	7.29599	6.27455
pBABE-DDX6sh2		84.9645	6.70037	8.33513
pBABE-DDX6sh3		89.3764	4.80925	5.81433
pBABE-LSM14Ash1		84.966	9.64903	5.38502
pBABE-LSM14Ash2		88.1425	5.38774	6.46979
YAP5SA-pLKO		64.8816	13.3883	21.7302
YAP5SA-DCP1Ash1		82.678	9.54304	7.77896
YAP5SA-DCP1Ash2		82.363	11.0031	6.63391
YAP5SA-DCP1Ash3		86.8628	7.89956	5.23763
YAP5SA-DCP1Ash4		77.0301	13.5872	9.38269
YAP5SA-DDX6sh1		77.5553	11.6965	10.7482
YAP5SA-DDX6sh2		79.9019	12.0546	8.04353
YAP5SA-DDX6sh4		85.5415	8.62012	5.83837
YAP5SA-LSM14Ash1		81.9265	11.2895	6.78405
YAP5SA-LSM14Ash2		82.0095	9.58566	8.40489
