# Supplementary material for: YAP/TAZ enhances P-body formation to promote tumorigenesis
Source: eLife. 2024 Jul 24;12:RP88573. doi: 10.7554/eLife.88573 (PMC11268890; doi:10.7554/eLife.88573)
Supplement: Figure 6—figure supplement 4—source data 1. [file elife-88573-fig6-figsupp4-data1.xlsx]

## Sheet: Figure 6-Figure Supplement 4A
pBABE/pLKO			pBABE/DDX6sh1			pBABE/DDX6sh2			pBABE/DDX6sh3			YAP5SA/pLKO			YAP5SA/DDX6sh1			YAP5SA/DDX6sh2			YAP5SA/DDX6sh3
99.8577	100.075	100.067	134.688	135.191	127.307	146.36	145.127	147.618	133.358	139.921	140.223	160.359	159.873	157.385	195.027	197.264	197.411	183.903	195.197	197.439	197.845	194.699	195.247
pBABE/DDX6sh1 vs pBABE/pLKO Pvalue<0.0001
pBABE/DDX6sh2 vs pBABE/pLKO Pvalue<0.0001
pBABE/DDX6sh3 vs pBABE/pLKO Pvalue<0.0001
YAP5SA/pLKO vs pBABE/pLKO Pvalue<0.0001
YAP5SA/DDX6sh1 vs YAP5SA/pLKO Pvalue<0.0001
YAP5SA/DDX6sh2 vs YAP5SA/pLKO Pvalue<0.0001
YAP5SA/DDX6sh3 vs YAP5SA/pLKO Pvalue<0.0001

## Sheet: Figure 6-Figure Supplement 4B
	pBABE-pLKO			pBABE-AJUBA sh1			pBABE-AJUBAsh2			YAP5SA-pLKO			YAP5SA-AJUBA sh1			YAP5SA-AJUBA sh2
YAP	0.995439	1.04803	0.958542	1.29177	1.40252	1.45028	1.14252	1.03762	1.15135	3.18929	3.27787	3.33943	3.82455	3.63513	3.6646	3.60045	3.53381	3.92295
AJUBA	1.0825	1.05357	0.876814	0.214111	0.204278	0.220625	0.167755	0.164504	0.161832	1.65463	1.67843	1.54066	0.311219	0.30929	0.320279	0.319113	0.405738	0.390123
		YAP					AJUBA
YAP5SA/pLKO vs pBABE/pLKO Pvalue<0.0001						pBABE/AJUBAsh1 vs pBABE/pLKO Pvalue<0.0001
						pBABE/AJUBAsh2 vs pBABE/pLKO Pvalue<0.0001
						YAP5SA/AJUBAsh1 vs YAP5SA/pLKO Pvalue<0.0001
						YAP5SA/AJUBAsh2 vs YAP5SA/pLKO Pvalue<0.0001
	pBABE-pLKO			pBABE-SAMD4Ash1			pBABE-SAMD4Ash2			YAP5SA-pLKO			YAP5SA-SAMD4Ash1			YAP5SA-SAMD4Ash2
YAP	1.21129	1.0576	0.780603	1.3986	1.44029	1.48046	0.989521	0.959273	0.960146	3.44869	3.35415	3.51006	4.76899	4.39631	4.46649	5.56395	5.44481	5.67966
SAMD4A	0.983608	1.06044	0.95872	0.500013	0.491096	0.4606	0.473882	0.424607	0.447592	1.78269	1.75087	1.77409	0.842039	0.83291	0.793945	0.797956	0.767288	0.735282
	YAP					SAMD4A
YAP5SA/pLKO vs pBABE/pLKO Pvalue<0.0001					pBABE/SAMD4Ash1 vs pBABE/pLKO Pvalue<0.0001
					pBABE/SAMD4Ash2 vs pBABE/pLKO Pvalue<0.0001
					YAP5SA/SAMD4Ash1 vs YAP5SA/pLKO Pvalue<0.0001
					YAP5SA/SAMD4Ash2 vs YAP5SA/pLKO Pvalue<0.0001

## Sheet: Figure 6-Figure Supplement 4C
Day	pBABE-pLKO					pBABE-SAMD4Ash1					pBABE-SAMD4Ash2					pBABE-AJUBAsh1					pBABE-AJUBAsh2					YAP5SA-pLKO					YAP5SA-SAMD4Ash1					YAP5SA-SAMD4Ash2					YAP5SA-AJUBAsh1					YAP5SA-AJUBAsh2
1	0.0135	0.0185	0.0195	0.0185	0.0255	0.0165	0.0215	0.0245	0.0135	0.0145	0.0155	0.0205	0.0205	0.0115	0.0235	0.0235	0.0275	0.0265	0.0265	0.0125	0.0155	0.0195	0.0245	0.0265	0.0185	0.0235	0.0205	0.0235	0.0165	0.0165	0.0115	0.0135	0.0095	0.0075	0.0065	0.0165	0.0125	0.0105	0.0105	0.0095	0.0065	0.0055	0.0075	0.0055	0.0035	0.0205	0.0215	0.0135	0.0105
2	0.045	0.031	0.043	0.036	0.034	0.045	0.036	0.031	0.046	0.027	0.039	0.042	0.04	0.029	0.03	0.043	0.04	0.043	0.04	0.037	0.045	0.026	0.027	0.031	0.021	0.044	0.034	0.037	0.038	0.036	0.031	0.023	0.015	0.016	0.029	0.02	0.017	0.022	0.011	0.015	0.016	0.014	0.017	0.01	0.008	0.014	0.025	0.022	0.013
3	0.074	0.066	0.075	0.078	0.08	0.034	0.046	0.055	0.049	0.05	0.043	0.043	0.018	0.032	0.034	0.017	0.038	0.031	0.03	0.022	0.052	0.052	0.034	0.05	0.037	0.106	0.142	0.126	0.117	0.125	0.048	0.065	0.051	0.072	0.07	0.045	0.064	0.05	0.047	0.053	0.059	0.023	0.064	0.067	0.052	0.052	0.075	0.046	0.053
4	0.203	0.204	0.183	0.25	0.179	0.111	0.105	0.101	0.096	0.083	0.081	0.077	0.081	0.061	0.08	0.049	0.058	0.069	0.082	0.068	0.124	0.093	0.118	0.078	0.095	0.382	0.353	0.329	0.346	0.399	0.16	0.172	0.151	0.145	0.137	0.107	0.128	0.121	0.092	0.118	0.136	0.124	0.139	0.115	0.117	0.099	0.109	0.101	0.111
5	0.5405	0.5235	0.5515	0.4785	0.4795	0.2435	0.2505	0.2205	0.1935	0.2415	0.1425	0.1935	0.1885	0.1575	0.1745	0.1785	0.1375	0.1075	0.1465	0.1375	0.2075	0.2445	0.1945	0.1985	0.1945	0.8865	0.8105	0.8115	0.7615	0.7065	0.3885	0.3675	0.3305	0.3815	0.3915	0.2575	0.2715	0.3415	0.2465	0.2545	0.3815	0.3565	0.3525	0.3035	0.3155	0.3155	0.2895	0.2085	0.2955
pBABE/AJUBAsh1 vs pBABE/pLKO Pvalue<0.0001							YAP5SA/pLKO vs pBABE/pLKO Pvalue<0.0001
pBABE/AJUBAsh2 vs pBABE/pLKO Pvalue<0.0001							YAP5SA/AJUBAsh1 vs YAP5SA/pLKO Pvalue<0.0001
pBABE/SAMD4Ash1 vs pBABE/pLKO Pvalue<0.0001							YAP5SA/AJUBAsh2 vs YAP5SA/pLKO Pvalue<0.0001
pBABE/SAMD4Ash2 vs pBABE/pLKO Pvalue<0.0001							YAP5SA/SAMD4Ash1 vs YAP5SA/pLKO Pvalue<0.0001
							YAP5SA/SAMD4Ash2 vs YAP5SA/pLKO Pvalue<0.0001
[truncated: 1 more columns]

## Sheet: Figure 6-Figure Supplement 4D
pBABE/pLKO			pBABE/SAMD4Ash1			pBABE/SAMD4Ash2			pBABE/AJUBAsh1			pBABE/AJUBAsh2			YAP5SA/pLKO			YAP5SA/SAMD4Ash1			YAP5SA/SAMD4Ash2			YAP5SA/AJUBAsh1			YAP5SA/AJUBAsh2
98.5503	98.7053	102.744	28.3023	28.2738	26.087	25.6912	26.0339	26.0054	26.5521	27.8903	24.4509	16.6542	16.5114	19.7427	211.242	212.168	223.702	92.8425	92.357	92.7731	68.412	68.6527	70.4723	50.6684	50.3951	50.3951	45.3401	46.3968	46.4253
pBABE/AJUBAsh1 vs pBABE/pLKO Pvalue<0.0001							YAP5SA/pLKO vs pBABE/pLKO Pvalue<0.0001
pBABE/AJUBAsh2 vs pBABE/pLKO Pvalue<0.0001							YAP5SA/AJUBAsh1 vs YAP5SA/pLKO Pvalue<0.0001
pBABE/SAMD4Ash1 vs pBABE/pLKO Pvalue<0.0001							YAP5SA/AJUBAsh2 vs YAP5SA/pLKO Pvalue<0.0001
pBABE/SAMD4Ash2 vs pBABE/pLKO Pvalue<0.0001							YAP5SA/SAMD4Ash1 vs YAP5SA/pLKO Pvalue<0.0001
							YAP5SA/SAMD4Ash2 vs YAP5SA/pLKO Pvalue<0.0001
