# Supplementary material for: YAP/TAZ enhances P-body formation to promote tumorigenesis
Source: eLife. 2024 Jul 24;12:RP88573. doi: 10.7554/eLife.88573 (PMC11268890; doi:10.7554/eLife.88573)
Supplement: Figure 6—source data 1. [file elife-88573-fig6-data1.xlsx]

## Sheet: Figure 6A
Day	pBABE-pLKO					pBABE-DCP1Ash1					pBABE-DCP1Ash2					pBABE-DCP1Ash3					pBABE-DCP1Ash4					YAP5SA-pLKO					YAP5SA-DCP1Ash1					YAP5SA-DCP1Ash2					YAP5SA-DCP1Ash3					YAP5SA-DCP1Ash4
1	0.0215	0.0185	0.0155	0.0125	0.0095	0.0245	0.0215	0.0195	0.0235	0.0155	0.0195	0.0255	0.0205	0.0185	0.0215	0.0385	0.0265	0.0295	0.0235	0.0235	0.0285	0.0275	0.0235	0.0255	0.0275	0.0185	0.0195	0.0145	0.0215	0.0225	0.0155	0.0205	0.0265	0.0405	0.0265	0.0145	0.0135	0.0135	0.0185	0.0205	0.0135	0.0215	0.0055	0.0225	0.0105	0.0085	0.0145	0.0215	0.0185
2	0.044	0.048	0.041	0.041	0.038	0.025	0.023	0.028	0.037	0.028	0.017	0.029	0.023	0.033	0.033	0.031	0.04	0.039	0.047	0.053	0.031	0.045	0.039	0.035	0.032	0.088	0.072	0.08	0.091	0.097	0.066	0.067	0.068	0.084	0.096	0.064	0.075	0.055	0.058	0.058	0.061	0.094	0.072	0.063	0.062	0.059	0.069	0.082	0.083
3	0.33	0.367	0.323	0.318	0.187	0.121	0.114	0.101	0.114	0.101	0.132	0.082	0.069	0.083	0.092	0.177	0.135	0.167	0.146	0.135	0.153	0.148	0.13	0.149	0.137	0.48	0.483	0.533	0.493	0.64	0.334	0.275	0.287	0.326	0.348	0.349	0.387	0.305	0.368	0.422	0.341	0.309	0.261	0.34	0.325	0.325	0.343	0.341	0.353
4	0.66	0.509	0.679	0.502	0.611	0.238	0.272	0.217	0.221	0.199	0.203	0.2	0.195	0.214	0.226	0.227	0.232	0.35	0.293	0.293	0.244	0.206	0.252	0.343	0.309	1.448	1.455	1.402	1.254	1.306	0.591	0.665	0.656	0.752	0.764	0.405	0.527	0.499	0.602	0.558	0.625	0.734	0.708	0.988	0.739	0.539	0.441	0.396	0.544
5	0.79	0.734	0.906	0.841	0.795	0.348	0.425	0.368	0.313	0.306	0.374	0.316	0.401	0.34	0.35	0.559	0.571	0.585	0.585	0.456	0.507	0.496	0.478	0.488	0.448	1.645	1.551	1.743	1.676	1.63	0.71	0.709	0.683	0.819	0.838	0.791	0.8	0.694	0.79	0.65	0.935	0.904	0.87	0.854	1.045	0.875	0.87	0.77	0.748
	pBABE-DCP1Ash1 vs pBABE-pLKO P value<0.0001							pBABE-YAP5SA vs pBABE-pLKO:P value<0.0001
	pBABE-DCP1Ash2 vs pBABE-pLKO P value<0.0001							YAP5SA vs YAP5SA-DCP1A-sh1:P value<0.0001
	pBABE-DCP1Ash3 vs pBABE-pLKO P value<0.0001							YAP5SA vs YAP5SA-DCP1A-sh2:P value<0.0001
	pBABE-DCP1Ash4 vs pBABE-pLKO P value<0.0001							YAP5SA vs YAP5SA-DCP1A-sh3:P value<0.0001
	pBABE-DCP1Ash1 vs pBABE-pLKO P value<0.0001							YAP5SA vs YAP5SA-DCP1A-sh4:P value<0.0001
Day	pBABE-pLKO					pBABE-DDX6sh1					pBABE-DX6sh2					pBABE-DDX6sh3					YAP5SA-pLKO					YAP5SA-DDX6sh1					YAP5SA-DDX6sh2					YAP5SA-DDX6sh3
1	0.006	0.022	0.021	0.02	0.018	0.028	0.03	0.034	0.04	0.025	0.022	0.022	0.021	0.028	0.019	0.026	0.019	0.028	0.027	0.025	0.024	0.035	0.028	0.019	0.014	0.028	0.018	0.032	0.024	0.02	0.025	0.014	0.012	0.024	0.017	0.025	0.031	0.028	0.025	0.03
2	0.038	0.044	0.045	0.05	0.048	0.041	0.031	0.027	0.031	0.042	0.042	0.036	0.051	0.038	0.033	0.029	0.032	0.042	0.043	0.035	0.068	0.093	0.091	0.09	0.086	0.044	0.063	0.047	0.055	0.046	0.062	0.061	0.054	0.057	0.048	0.051	0.054	0.051	0.039	0.049
3	0.1505	0.1285	0.1685	0.1545	0.1755	0.0765	0.1065	0.0995	0.0905	0.1205	0.0725	0.0775	0.0995	0.0875	0.1205	0.0855	0.1045	0.1035	0.1175	0.1185	0.3475	0.4115	0.4245	0.4205	0.4225	0.1285	0.1625	0.1345	0.1745	0.1935	0.1205	0.1255	0.1425	0.1575	0.1685	0.1625	0.2065	0.1335	0.1625	0.1895
4	0.552	0.66	0.679	0.507	0.419	0.259	0.172	0.193	0.215	0.218	0.282	0.289	0.254	0.282	0.316	0.349	0.279	0.277	0.292	0.311	1.147	1.005	1.04	1.066	1.086	0.37	0.365	0.389	0.388	0.443	0.417	0.596	0.587	0.462	0.58	0.569	0.542	0.458	0.548	0.545
5	0.6055	0.7795	0.7005	0.7145	0.6975	0.2315	0.1875	0.2185	0.2365	0.2225	0.2945	0.4175	0.4055	0.2835	0.3275	0.4045	0.3605	0.4615	0.3415	0.3595	1.3835	1.3785	1.4185	1.2205	1.2835	0.4435	0.4185	0.3755	0.4875	0.5095	0.6005	0.4885	0.7815	0.6585	0.7305	0.6385	0.6225	0.6585	0.6865	0.7005
	pBABE-DDX6sh1 vs pBABE-pLKO P value<0.0001							pBABE-YAP5SA vs pBABE-pLKO:P value<0.0001
	pBABE-DDX6sh2 vs pBABE-pLKO P value<0.0001							YAP5SA vs YAP5SA-DDX6-sh1:P value<0.0001
	pBABE-DDX6sh3 vs pBABE-pLKO P value<0.0001							YAP5SA vs YAP5SA-DDX6-sh2:P value<0.0001
								YAP5SA vs YAP5SA-DDX6-sh3:P value<0.0001
Day	pBABE-pLKO					pBABE-LSM14Ash1					pBABE-LSM14Ash2					YAP5SA-pLKO					YAP5SA-LSM14Ash1					YAP5SA-LSM14Ash2
1	0.017	0.016	0.006	0.006	0.016	0.029	0.028	0.028	0.025	0.021	0.022	0.019	0.014	0.016	0.018	0.033	0.041	0.041	0.024	0.036	0.038	0.039	0.032	0.037	0.032	0.025	0.032	0.031	0.027	0.043
2	0.03	0.044	0.042	0.045	0.047	0.058	0.063	0.063	0.073	0.052	0.063	0.065	0.045	0.041	0.044	0.087	0.076	0.075	0.069	0.075	0.062	0.076	0.062	0.076	0.075	0.061	0.058	0.036	0.046	0.059
3	0.173	0.188	0.158	0.167	0.164	0.036	0.056	0.067	0.108	0.072	0.107	0.088	0.089	0.097	0.084	0.324	0.298	0.353	0.334	0.341	0.197	0.139	0.11	0.17	0.108	0.139	0.112	0.097	0.096	0.124
4	0.488	0.49	0.529	0.498	0.471	0.253	0.284	0.361	0.258	0.292	0.184	0.16	0.169	0.14	0.206	0.884	0.739	0.885	0.9014	0.8	0.337	0.409	0.425	0.37	0.352	0.241	0.271	0.205	0.253	0.166
	pBABE-LSM14Ash1 vs pBABE-pLKO P value<0.0001							pBABE-YAP5SA vs pBABE-pLKO:P value<0.0001
	pBABE-LSM14Ash2 vs pBABE-pLKO P value<0.0001							YAP5SA vs YAP5SA-LSM14A-sh1:P value<0.0001
								YAP5SA vs YAP5SA-LSM14A-sh2:P value<0.0001
[truncated: 1 more columns]

## Sheet: Figure 6B
	pBABE/pLKO			pBABE/DCP1Ash1			pBABE/DCP1Ash2			pBABE/DCP1Ash3			pBABE/DCP1Ash4			pBABE/DDX6sh1			pBABE/DDX6sh2			pBABE/DDX6sh3			pBABE/LSM14Ash1			pBABE/LSM14Ash2			YAP5SA/pLKO			YAP5SA/DCP1Ash1			YAP5SA/DCP1Ash2			YAP5SA/DCP1Ash3			YAP5SA/DCP1Ash4			YAP5SA/DDX6sh1			YAP5SA/DDX6sh2
Colony formation ability(%)	100.05	102.503	97.447	31.3747	30.2196	30.267	27.8244	28.1463	27.7108	27.4931	19.9665	23.7061	36.5154	36.6669	37.6041	15.6261	15.7139	20.0928	31.8086	31.9697	29.3044	45.9702	46.7464	46.6	41.5213	42.7348	37.6547	12.6943	13.075	24.1632	168.84	164.466	158.369	80.8508	82.7253	78.323	63.5446	63.5446	67.3978	81.3242	84.6093	77.2816	84.4389	79.355	77.3763	60.6297	61.2448	61.3327	110.232
pBABE-DCP1Ash1 vs pBABE-pLKO P value<0.0001							pBABE-YAP5SA vs pBABE-pLKO:P value<0.0001
pBABE-DCP1Ash2 vs pBABE-pLKO P value<0.0001							YAP5SA vs YAP5SA-DCP1A-sh1:P value<0.0001
pBABE-DCP1Ash3 vs pBABE-pLKO P value<0.0001							YAP5SA vs YAP5SA-DCP1A-sh2:P value<0.0001
pBABE-DCP1Ash4 vs pBABE-pLKO P value<0.0001							YAP5SA vs YAP5SA-DCP1A-sh3:P value<0.0001
pBABE-DCP1Ash1 vs pBABE-pLKO P value<0.0001							YAP5SA vs YAP5SA-DCP1A-sh4:P value<0.0001
pBABE-DDX6sh1 vs pBABE-pLKO P value<0.0001							YAP5SA vs YAP5SA-DDX6-sh1:P value<0.0001
pBABE-DDX6sh2 vs pBABE-pLKO P value<0.0001							YAP5SA vs YAP5SA-DDX6-sh2:P value<0.0001
pBABE-DDX6sh3 vs pBABE-pLKO P value<0.0001							YAP5SA vs YAP5SA-DDX6-sh3:P value<0.0001
pBABE-LSM14Ash1 vs pBABE-pLKO P value<0.0001							YAP5SA vs YAP5SA-LSM14A-sh1:P value<0.0001
pBABE-LSM14Ash2 vs pBABE-pLKO P value<0.0001							YAP5SA vs YAP5SA-LSM14A-sh2:P value<0.0001
[truncated: 11 more columns]

## Sheet: Figure 6C
pBABE/pLKO			pBABE/DCP1Ash1			pBABE/DCP1Ash2			pBABE/DCP1Ash3			pBABE/DCP1Ash4			YAP5SA/pLKO			YAP5SA/DCP1Ash1			YAP5SA/DCP1Ash2			YAP5SA/DCP1Ash3			YAP5SA/DCP1Ash4
100.308	99.722	99.9702	53.5248	54.4532	54.2049	60.3857	60.2517	58.7847	32.9941	67.6985	65.2162	51.0996	50.5734	52.8149	186.757	194.045	189.304	106.28	99.645	104.935	124.671	124.793	127.325	103.252	102.894	105.158	98.667	95.2539	89.8153
pBABE-DCP1Ash1 vs pBABE-pLKO P value<0.0001							pBABE-YAP5SA vs pBABE-pLKO:P value<0.0001
pBABE-DCP1Ash2 vs pBABE-pLKO P value<0.0001							YAP5SA vs YAP5SA-DCP1A-sh1:P value<0.0001
pBABE-DCP1Ash3 vs pBABE-pLKO P value<0.0001							YAP5SA vs YAP5SA-DCP1A-sh2:P value<0.0001
pBABE-DCP1Ash4 vs pBABE-pLKO P value<0.0001							YAP5SA vs YAP5SA-DCP1A-sh3:P value<0.0001
pBABE-DCP1Ash1 vs pBABE-pLKO P value<0.0001							YAP5SA vs YAP5SA-DCP1A-sh4:P value<0.0001
pBABE/pLKO			pBABE/LSM14Ash1			pBABE/LSM14Ash2			YAP5SA/pLKO			YAP5SA/LSM14Ash1			YAP5SA/LSM14Ash2
95.9249	96.3295	107.746	27.4595	24.1647	24.1965	32.789	32.5809	29.7168	150.396	153.737	156.569	80.4595	69.896	67.0029	91.6792	95.8757	87.4942
	pBABE-LSM14Ash1 vs pBABE-pLKO P value<0.0001							pBABE-YAP5SA vs pBABE-pLKO:P value<0.0001
	pBABE-LSM14Ash2 vs pBABE-pLKO P value<0.0001							YAP5SA vs YAP5SA-LSM14A-sh1:P value<0.0001
								YAP5SA vs YAP5SA-LSM14A-sh2:P value<0.0001
