# Supplementary material for: YAP/TAZ enhances P-body formation to promote tumorigenesis
Source: eLife. 2024 Jul 24;12:RP88573. doi: 10.7554/eLife.88573 (PMC11268890; doi:10.7554/eLife.88573)
Supplement: Figure 7—figure supplement 1—source data 1. [file elife-88573-fig7-figsupp1-data1.xlsx]

## Sheet: Figure 7-Figure Supplement 1A
CCN1 log2(TPM+1) Expression 22Q1 Public	SAMD4A log2(TPM+1) Expression 22Q1 Public		AXL log2(TPM+1) Expression 22Q1 Public	SAMD4A log2(TPM+1) Expression 22Q1 Public		AMOTL2 log2(TPM+1) Expression 22Q1 Public	SAMD4A log2(TPM+1) Expression 22Q1 Public		CCN1 log2(TPM+1) Expression 22Q1 Public	AJUBA log2(TPM+1) Expression 22Q1 Public		AXL log2(TPM+1) Expression 22Q1 Public	AJUBA log2(TPM+1) Expression 22Q1 Public		AMOTL2 log2(TPM+1) Expression 22Q1 Public	AJUBA log2(TPM+1) Expression 22Q1 Public		CCN1 log2(TPM+1) Expression 22Q1 Public	WTIP log2(TPM+1) Expression 22Q1 Public		AXL log2(TPM+1) Expression 22Q1 Public	WTIP log2(TPM+1) Expression 22Q1 Public		AMOTL2 log2(TPM+1) Expression 22Q1 Public	WTIP log2(TPM+1) Expression 22Q1 Public
7.36737	1.74846	r = 0.663	2.80323	1.74846	r = 0.586	4.10014	1.74846	r = 0.612	7.36737	4.89191	r = 0.747	2.80323	4.89191	r = 0.607	4.10014	4.89191	r = 0.789	7.36737	0.389567	r = 0.604	2.80323	0.389567	r = 0.498	4.10014	0.389567	r = 0.597
8.30383	5.51318	P=2.09E-177	1.27501	5.51318	P= 5.52E-129	3.97911	5.51318	P= 8.13E-144	8.30383	3.20006	P=3.43E-249	1.27501	3.20006	P= 4.39E-141	3.97911	3.20006	P= 5.82E-297	8.30383	3.41954	P= 5.40E-139	1.27501	3.41954	P= 4.98E-88	3.97911	3.41954	P= 2.61E-135
5.77873	3.46858		3.52105	3.46858		4.64559	3.46858		5.77873	2.71589		3.52105	2.71589		4.64559	2.71589		5.77873	2.44095		3.52105	2.44095		4.64559	2.44095
5.81992	1.25096		5.32121	1.25096		4.06523	1.25096		5.81992	6.0027		5.32121	6.0027		4.06523	6.0027		5.81992	0.545968		5.32121	0.545968		4.06523	0.545968
5.41414	2.90881		0.226509	2.90881		4.91121	2.90881		5.41414	5.18349		0.226509	5.18349		4.91121	5.18349		5.41414	1.97085		0.226509	1.97085		4.91121	1.97085
1.73118	0.555816		0.344828	0.555816		4.42425	0.555816		1.73118	4.01257		0.344828	4.01257		4.42425	4.01257		1.73118	0.042644		0.344828	0.042644		4.42425	0.042644
2.87381	1.82782		0.214125	1.82782		2.40054	1.82782		2.87381	2.92979		0.214125	2.92979		2.40054	2.92979		2.87381	0.286881		0.214125	0.286881		2.40054	0.286881
4.26903	5.34767		0.286881	5.34767		2.09085	5.34767		4.26903	5.8505		0.286881	5.8505		2.09085	5.8505		4.26903	0.443607		0.286881	0.443607		2.09085	0.443607
4.4957	4.10685		8.21965	4.10685		5.8125	4.10685		4.4957	6.78005		8.21965	6.78005		5.8125	6.78005		4.4957	0.863938		8.21965	0.863938		5.8125	0.863938
3.70598	0.903038		0.356144	0.903038		3.58737	0.903038		3.70598	2.58256		0.356144	2.58256		3.58737	2.58256		3.70598	0.536053		0.356144	0.536053		3.58737	0.536053
8.01519	4.49442		6.65893	4.49442		5.63692	4.49442		8.01519	5.30159		6.65893	5.30159		5.63692	5.30159		8.01519	3.18428		6.65893	3.18428		5.63692	3.18428
5.90953	3.24641		5.84574	3.24641		5.30743	3.24641		5.90953	5.74712		5.84574	5.74712		5.30743	5.74712		5.90953	3.66562		5.84574	3.66562		5.30743	3.66562
6.92612	4.12267		0.62293	4.12267		7.70363	4.12267		6.92612	3.97453		0.62293	3.97453		7.70363	3.97453		6.92612	3.74308		0.62293	3.74308		7.70363	3.74308
8.95099	3.14078		6.23841	3.14078		4.14731	3.14078		8.95099	4.72792		6.23841	4.72792		4.14731	4.72792		8.95099	0.070389		6.23841	0.070389		4.14731	0.070389
0.333424	1.54102		0.097611	1.54102		0.163499	1.54102		0.333424	1.38405		0.097611	1.38405		0.163499	1.38405		0.333424	0.214125		0.097611	0.214125		0.163499	0.214125
9.27174	4.34127		7.87995	4.34127		5.7761	4.34127		9.27174	5.8301		7.87995	5.8301		5.7761	5.8301		9.27174	3.79909		7.87995	3.79909		5.7761	3.79909
4.69711	2.51853		6.42744	2.51853		5.6865	2.51853		4.69711	4.07724		6.42744	4.07724		5.6865	4.07724		4.69711	2.24793		6.42744	2.24793		5.6865	2.24793
4.02237	2.46728		4.60288	2.46728		3.18745	2.46728		4.02237	4.18269		4.60288	4.18269		3.18745	4.18269		4.02237	2.80529		4.60288	2.80529		3.18745	2.80529
6.94848	2.63227		6.16772	2.63227		5.37226	2.63227		6.94848	5.7498		6.16772	5.7498		5.37226	5.7498		6.94848	4.84699		6.16772	4.84699		5.37226	4.84699
2.77189	0.31034		0.214125	0.31034		3.83491	0.31034		2.77189	2.41684		0.214125	2.41684		3.83491	2.41684		2.77189	0.238787		0.214125	0.238787		3.83491	0.238787
9.39658	4.7366		7.97051	4.7366		6.07296	4.7366		9.39658	4.34199		7.97051	4.34199		6.07296	4.34199		9.39658	3.66676		7.97051	3.66676		6.07296	3.66676
6.27482	2.3978		0.298658	2.3978		4.80374	2.3978		6.27482	4.31759		0.298658	4.31759		4.80374	4.31759		6.27482	1.43829		0.298658	1.43829		4.80374	1.43829
4.89869	4.98185		3.5656	4.98185		5.6014	4.98185		4.89869	6.14507		3.5656	6.14507		5.6014	6.14507		4.89869	1.20163		3.5656	1.20163		5.6014	1.20163
6.6279	3.49057		6.11873	3.49057		5.85574	3.49057		6.6279	3.86394		6.11873	3.86394		5.85574	3.86394		6.6279	2.9222		6.11873	2.9222		5.85574	2.9222
5.89045	0.097611		4.81147	0.097611		6.17772	0.097611		5.89045	3.02325		4.81147	3.02325		6.17772	3.02325		5.89045	2.55336		4.81147	2.55336		6.17772	2.55336
5.77768	3.69488		5.41853	3.69488		4.74578	3.69488		5.77768	3.45154		5.41853	3.45154		4.74578	3.45154		5.77768	1.46989		5.41853	1.46989		4.74578	1.46989
7.29903	4.31034		7.02226	4.31034		5.13832	4.31034		7.29903	4.32121		7.02226	4.32121		5.13832	4.32121		7.29903	1.98914		7.02226	1.98914		5.13832	1.98914
5.71204	0.189034		0.163499	0.189034		3.89045	0.189034		5.71204	2.25096		0.163499	2.25096		3.89045	2.25096		5.71204	0.111031		0.163499	0.111031		3.89045	0.111031
5.77294	2.80529		3.24336	2.80529		4.9855	2.80529		5.77294	6.31325		3.24336	6.31325		4.9855	6.31325		5.77294	0.495695		3.24336	0.495695		4.9855	0.495695
7.23984	3.44228		6.16852	3.44228		6.88374	3.44228		7.23984	5.10811		6.16852	5.10811		6.88374	5.10811		7.23984	2.43296		6.16852	2.43296		6.88374	2.43296
6.31415	1.05658		1.59455	1.05658		0.201634	1.05658		6.31415	3.10769		1.59455	3.10769		0.201634	3.10769		6.31415	2.52857		1.59455	2.52857		0.201634	2.52857
5.6094	2.51349		4.28836	2.51349		4.85499	2.51349		5.6094	5.91886		4.28836	5.91886		4.85499	5.91886		5.6094	0.555816		4.28836	0.555816		4.85499	0.555816
7.50764	2.01436		8.11603	2.01436		4.75275	2.01436		7.50764	5.07039		8.11603	5.07039		4.75275	5.07039		7.50764	1.90304		8.11603	1.90304		4.75275	1.90304
6.67779	2.61589		3.0268	2.61589		5.09635	2.61589		6.67779	5.06307		3.0268	5.06307		5.09635	5.06307		6.67779	3.49569		3.0268	3.49569		5.09635	3.49569
9.70824	5.9472		8.09461	5.9472		6.83365	5.9472		9.70824	7.35209		8.09461	7.35209		6.83365	7.35209		9.70824	3.01257		8.09461	3.01257		6.83365	3.01257
4.18587	2.0321		5.75409	2.0321		6.8627	2.0321		4.18587	6.11291		5.75409	6.11291		6.8627	6.11291		4.18587	2.72465		5.75409	2.72465		6.8627	2.72465
0.62293	4.02768		0.15056	4.02768		0.111031	4.02768		0.62293	1.5509		0.15056	1.5509		0.111031	1.5509		0.62293	0.454176		0.15056	0.454176		0.111031	0.454176
8.02835	3.70044		8.8644	3.70044		6.13237	3.70044		8.02835	5.24374		8.8644	5.24374		6.13237	5.24374		8.02835	1.926		8.8644	1.926		6.13237	1.926
6.4733	2.37574		1.58976	2.37574		4.44824	2.37574		6.4733	5.71534		1.58976	5.71534		4.44824	5.71534		6.4733	2.25096		1.58976	2.25096		4.44824	2.25096
6.70763	4.14405		8.36519	4.14405		5.64357	4.14405		6.70763	6.46042		8.36519	6.46042		5.64357	6.46042		6.70763	3.82782		8.36519	3.82782		5.64357	3.82782
0.678072	0.056584		0.176323	0.056584		0.163499	0.056584		0.678072	2.27501		0.176323	2.27501		0.163499	2.27501		0.678072	0.739848		0.176323	0.739848		0.163499	0.739848
9.28739	2.49314		5.89748	2.49314		6.22593	2.49314		9.28739	7.39232		5.89748	7.39232		6.22593	7.39232		9.28739	0.333424		5.89748	0.333424		6.22593	0.333424
4.97682	2.16671		2.8339	2.16671		3.97085	2.16671		4.97682	5.05268		2.8339	5.05268		3.97085	5.05268		4.97682	3.13093		2.8339	3.13093		3.97085	3.13093
0.432959	2.22033		0.137504	2.22033		0.163499	2.22033		0.432959	1.66903		0.137504	1.66903		0.163499	1.66903		0.432959	0.613532		0.137504	0.613532		0.163499	0.613532
1.14405	4.65993		0.275007	4.65993		2.17313	4.65993		1.14405	2.62527		0.275007	2.62527		2.17313	2.62527		1.14405	1.59932		0.275007	1.59932		2.17313	1.59932
7.74974	4.11936		6.50668	4.11936		5.7879	4.11936		7.74974	5.19535		6.50668	5.19535		5.7879	5.19535		7.74974	0.978196		6.50668	0.978196		5.7879	0.978196
6.48123	0.863938		0.790772	0.863938		7.10192	0.863938		6.48123	4.46074		0.790772	4.46074		7.10192	4.46074		6.48123	0.201634		0.790772	0.201634		7.10192	0.201634
5.94462	3.27947		4.37434	3.27947		5.38163	3.27947		5.94462	3.68594		4.37434	3.68594		5.38163	3.68594		5.94462	0.555816		4.37434	0.555816		5.38163	0.555816
8.58703	2.8679		6.3293	2.8679		5.80012	2.8679		8.58703	5.06824		6.3293	5.06824		5.80012	5.06824		8.58703	2.39506		6.3293	2.39506		5.80012	2.39506
6.90965	2.26003		2.62994	2.26003		4.69265	2.26003		6.90965	5.35403		2.62994	5.35403		4.69265	5.35403		6.90965	0.097611		2.62994	0.097611		4.69265	0.097611
9.16609	4.70763		6.06242	4.70763		6.70791	4.70763		9.16609	5.60792		6.06242	5.60792		6.70791	5.60792		9.16609	4.77347		6.06242	4.77347		6.70791	4.77347
8.15254	2.72683		7.05474	2.72683		3.35896	2.72683		8.15254	5.81813		7.05474	5.81813		3.35896	5.81813		8.15254	2.43296		7.05474	2.43296		3.35896	2.43296
0.042644	0.678072		0.014355	0.678072		0.014355	0.678072		0.042644	0.31034		0.014355	0.31034		0.014355	0.31034		0.042644	0.042644		0.014355	0.042644		0.014355	0.042644
5.74578	3.66106		0.536053	3.66106		5.25096	3.66106		5.74578	4.83996		0.536053	4.83996		5.25096	4.83996		5.74578	2.0072		0.536053	2.0072		5.25096	2.0072
2.25096	0.85599		0.298658	0.85599		4.10685	0.85599		2.25096	4.26003		0.298658	4.26003		4.10685	4.26003		2.25096	4.0036		0.298658	4.0036		4.10685	4.0036
2.14731	1.62293		0.400538	1.62293		4.15623	1.62293		2.14731	5.01257		0.400538	5.01257		4.15623	5.01257		2.14731	3.92695		0.400538	3.92695		4.15623	3.92695
9.10787	2.21413		7.92754	2.21413		5.75862	2.21413		9.10787	6.46254		7.92754	6.46254		5.75862	6.46254		9.10787	3.21723		7.92754	3.21723		5.75862	3.21723
9.02591	2.51853		7.73064	2.51853		7.2724	2.51853		9.02591	5.34908		7.73064	5.34908		7.2724	5.34908		9.02591	4.61294		7.73064	4.61294		7.2724	4.61294
5.63198	1.93734		0.321928	1.93734		5.75061	1.93734		5.63198	4.55643		0.321928	4.55643		5.75061	4.55643		5.63198	0.176323		0.321928	0.176323		5.75061	0.176323
0.536053	2.79701		0.163499	2.79701		0.163499	2.79701		0.536053	4.64501		0.163499	4.64501		0.163499	4.64501		0.536053	0.454176		0.163499	0.454176		0.163499	0.454176
6.14873	0.584963		1.65535	0.584963		4.8885	0.584963		6.14873	5.82934		1.65535	5.82934		4.8885	5.82934		6.14873	2.7866		1.65535	2.7866		4.8885	2.7866
6.8107	3.51728		4.78293	3.51728		4.81455	3.51728		6.8107	5.67271		4.78293	5.67271		4.81455	5.67271		6.8107	0.62293		4.78293	0.62293		4.81455	0.62293
2.86196	0.956057		0.263034	0.956057		5.90014	0.956057		2.86196	2.98002		0.263034	2.98002		5.90014	2.98002		2.86196	0.485427		0.263034	0.485427		5.90014	0.485427
4.72137	0.15056		0.15056	0.15056		5.70072	0.15056		4.72137	5.1807		0.15056	5.1807		5.70072	5.1807		4.72137	0.163499		0.15056	0.163499		5.70072	0.163499
7.61993	2.3978		6.3194	2.3978		6.01881	2.3978		7.61993	4.81506		6.3194	4.81506		6.01881	4.81506		7.61993	0.124328		6.3194	0.124328		6.01881	0.124328
0.028569	0.028569		0.014355	0.028569		0.084064	0.028569		0.028569	2.11103		0.014355	2.11103		0.084064	2.11103		0.028569	0.378512		0.014355	0.378512		0.084064	0.378512
6.14507	3.93923		3.16189	3.93923		4.71809	3.93923		6.14507	4.8475		3.16189	4.8475		4.71809	4.8475		6.14507	1.9486		3.16189	1.9486		4.71809	1.9486
6.4707	3.53854		4.81813	3.53854		5.61941	3.53854		6.4707	5.26978		4.81813	5.26978		5.61941	5.26978		6.4707	1.45418		4.81813	1.45418		5.61941	1.45418
7.49161	2.79494		7.07007	2.79494		4.99774	2.79494		7.49161	4.79129		7.07007	4.79129		4.99774	4.79129		7.49161	2.99639		7.07007	2.99639		4.99774	2.99639
8.18001	3.93263		7.14098	3.93263		5.84046	3.93263		8.18001	5.70846		7.14098	5.70846		5.84046	5.70846		8.18001	3.15543		7.14098	3.15543		5.84046	3.15543
7.91247	2.14078		0.650765	2.14078		6.89785	2.14078		7.91247	4.86344		0.650765	4.86344		6.89785	4.86344		7.91247	4.01168		0.650765	4.01168		6.89785	4.01168
9.3962	6.36036		5.65335	6.36036		6.52105	6.36036		9.3962	5.12516		5.65335	5.12516		6.52105	5.12516		9.3962	4.30597		5.65335	4.30597		6.52105	4.30597
4.87774	3.57046		7.24755	3.57046		5.13709	3.57046		4.87774	2.83794		7.24755	2.83794		5.13709	2.83794		4.87774	0.526069		7.24755	0.526069		5.13709	0.526069
4.27277	2.27799		0.389567	2.27799		5.57894	2.27799		4.27277	4.54597		0.389567	4.54597		5.57894	4.54597		4.27277	3.03386		0.389567	3.03386		5.57894	3.03386
1.03562	0.933573		0.056584	0.933573		0	0.933573		1.03562	1.26303		0.056584	1.26303		0	1.26303		1.03562	0.15056		0.056584	0.15056		0	0.15056
6.37173	4.06091		0.757023	4.06091		5.89772	4.06091		6.37173	6.02303		0.757023	6.02303		5.89772	6.02303		6.37173	3.51979		0.757023	3.51979		5.89772	3.51979
7.62176	1.51096		6.35579	1.51096		5.96	1.51096		7.62176	4.46271		6.35579	4.46271		5.96	4.46271		7.62176	3.79181		6.35579	3.79181		5.96	3.79181
6.36545	1.73552		5.37643	1.73552		4.69989	1.73552		6.36545	2.95791		5.37643	2.95791		4.69989	2.95791		6.36545	1.04264		5.37643	1.04264		4.69989	1.04264
9.59412	5.01257		8.16335	5.01257		7.3311	5.01257		9.59412	3.49569		8.16335	3.49569		7.3311	3.49569		9.59412	0.526069		8.16335	0.526069		7.3311	0.526069
3.0321	0.526069		0.613532	0.526069		2.98002	0.526069		3.0321	2.51601		0.613532	2.51601		2.98002	2.51601		3.0321	0.411426		0.613532	0.411426		2.98002	0.411426
6.04177	2.65535		2.61353	2.65535		5.41075	2.65535		6.04177	5.5008		2.61353	5.5008		5.41075	5.5008		6.04177	4.35403		2.61353	4.35403		5.41075	4.35403
3.17632	4.12846		0.042644	4.12846		4.11686	4.12846		3.17632	3.17792		0.042644	3.17792		4.11686	3.17792		3.17632	4.40803		0.042644	4.40803		4.11686	4.40803
0	4.53107		0.014355	4.53107		0	4.53107		0	2		0.014355	2		0	2		0	0.028569		0.014355	0.028569		0	0.028569
6.65993	1.56072		7.66739	1.56072		4.33056	1.56072		6.65993	3.67016		7.66739	3.67016		4.33056	3.67016		6.65993	2.65076		7.66739	2.65076		4.33056	2.65076
4.29646	1.31615		1.79077	1.31615		4.59036	1.31615		4.29646	5.00854		1.79077	5.00854		4.59036	5.00854		4.29646	1.33914		1.79077	1.33914		4.59036	1.33914
1.20163	0.422233		0.378512	0.422233		3.06523	0.422233		1.20163	0.356144		0.378512	0.356144		3.06523	0.356144		1.20163	0.678072		0.378512	0.678072		3.06523	0.678072
3.7866	1.68706		1.24489	1.68706		4.42828	1.68706		3.7866	5.20906		1.24489	5.20906		4.42828	5.20906		3.7866	4.11686		1.24489	4.11686		4.42828	4.11686
1.25096	0.678072		1.47508	0.678072		2.89142	0.678072		1.25096	2.34199		1.47508	2.34199		2.89142	2.34199		1.25096	1.31615		1.47508	1.31615		2.89142	1.31615
5.17632	3.44758		0.9855	3.44758		5.20789	3.44758		5.17632	6.40888		0.9855	6.40888		5.20789	6.40888		5.17632	0.505891		0.9855	0.505891		5.20789	0.505891
8.36054	3.8679		5.52795	3.8679		5.77057	3.8679		8.36054	5.17353		5.52795	5.17353		5.77057	5.17353		8.36054	4.19298		5.52795	4.19298		5.77057	4.19298
0.526069	6.29554		0.678072	6.29554		4.45352	6.29554		0.526069	5.05441		0.678072	5.05441		4.45352	5.05441		0.526069	4.33271		0.678072	4.33271		4.45352	4.33271
9.29852	4.3978		8.23228	4.3978		7.06113	4.3978		9.29852	4.9458		8.23228	4.9458		7.06113	4.9458		9.29852	4.66391		8.23228	4.66391		7.06113	4.66391
6.45385	4.42962		6.48623	4.42962		5.45615	4.42962		6.45385	4.30961		6.48623	4.30961		5.45615	4.30961		6.45385	3.06005		6.48623	3.06005		5.45615	3.06005
1.87971	1.90689		0.555816	1.90689		4.2765	1.90689		1.87971	4.52482		0.555816	4.52482		4.2765	4.52482		1.87971	1.41684		0.555816	1.41684		4.2765	1.41684
10.6511	3.56803		7.26782	3.56803		6.24944	3.56803		10.6511	5.64184		7.26782	5.64184		6.24944	5.64184		10.6511	1.03562		7.26782	1.03562		6.24944	1.03562
5.779	2.09085		4.78346	2.09085		5.35297	2.09085		5.779	5.50176		4.78346	5.50176		5.35297	5.50176		5.779	0.176323		4.78346	0.176323		5.35297	0.176323
5.62352	2.73118		4.32193	2.73118		4.17872	2.73118		5.62352	3.87381		4.32193	3.87381		4.17872	3.87381		5.62352	1.43829		4.32193	1.43829		4.17872	1.43829
9.74029	3.63575		6.96359	3.63575		5.27463	3.63575		9.74029	6.36229		6.96359	6.36229		5.27463	6.36229		9.74029	2.31034		6.96359	2.31034		5.27463	2.31034
7.82642	3.30159		4.89385	3.30159		6.56758	3.30159		7.82642	4.15218		4.89385	4.15218		6.56758	4.15218		7.82642	3.86592		4.89385	3.86592		6.56758	3.86592
7.27137	3.75489		6.63851	3.75489		5.5404	3.75489		7.27137	5.51979		6.63851	5.51979		5.5404	5.51979		7.27137	3.70708		6.63851	3.70708		5.5404	3.70708
1.19535	1.20789		0.941106	1.20789		0.464668	1.20789		1.19535	0.918386		0.941106	0.918386		0.464668	0.918386		1.19535	0.516015		0.941106	0.516015		0.464668	0.516015
2.04614	3.82782		0.042644	3.82782		3.27799	3.82782		2.04614	4.5097		0.042644	4.5097		3.27799	4.5097		2.04614	1.59932		0.042644	1.59932		3.27799	1.59932
9.23943	2.61117		5.32157	2.61117		4.42694	2.61117		9.23943	4.82324		5.32157	4.82324		4.42694	4.82324		9.23943	0.713696		5.32157	0.713696		4.42694	0.713696
8.55194	3.06867		6.82985	3.06867		4.96578	3.06867		8.55194	6.26454		6.82985	6.26454		4.96578	6.26454		8.55194	1.03562		6.82985	1.03562		4.96578	1.03562
7.12039	4.18507		1.66448	4.18507		5.34837	4.18507		7.12039	6.7174		1.66448	6.7174		5.34837	6.7174		7.12039	0.226509		1.66448	0.226509		5.34837	0.226509
7.51814	3.06867		5.49634	3.06867		5.70736	3.06867		7.51814	6.66775		5.49634	6.66775		5.70736	6.66775		7.51814	1.91457		5.49634	1.91457		5.70736	1.91457
2.5435	1.76554		0.250962	1.76554		4.62994	1.76554		2.5435	5.09297		0.250962	5.09297		4.62994	5.09297		2.5435	0.367371		0.250962	0.367371		4.62994	0.367371
1.49569	1.38405		0.604071	1.38405		2.42223	1.38405		1.49569	1		0.604071	1		2.42223	1		1.49569	0.275007		0.604071	0.275007		2.42223	0.275007
7.43338	2.30743		1.95977	2.30743		5.46565	2.30743		7.43338	4.47444		1.95977	4.47444		5.46565	4.47444		7.43338	0.678072		1.95977	0.678072		5.46565	0.678072
8.72277	3.34767		8.61508	3.34767		6.48816	3.34767		8.72277	6.41566		8.61508	6.41566		6.48816	6.41566		8.72277	4.05918		8.61508	4.05918		6.48816	4.05918
6.82668	2.11437		5.75729	2.11437		4.88996	2.11437		6.82668	5.43496		5.75729	5.43496		4.88996	5.43496		6.82668	3.48285		5.75729	3.48285		4.88996	3.48285
6.44659	2.06695		5.48543	2.06695		5.43496	2.06695		6.44659	5.73227		5.48543	5.73227		5.43496	5.73227		6.44659	1.33342		5.48543	1.33342		5.43496	1.33342
7.57758	4.70376		3.16993	4.70376		6.28762	4.70376		7.57758	5.14364		3.16993	5.14364		6.28762	5.14364		7.57758	1.66903		3.16993	1.66903		6.28762	1.66903
2.10434	0.042644		0.263034	0.042644		0.111031	0.042644		2.10434	1.5008		0.263034	1.5008		0.111031	1.5008		2.10434	0.137504		0.263034	0.137504		0.111031	0.137504
9.47891	2.50589		5.59664	2.50589		6.03408	2.50589		9.47891	6.19967		5.59664	6.19967		6.03408	6.19967		9.47891	4.46532		5.59664	4.46532		6.03408	4.46532
2.7866	5.21684		1.9855	5.21684		3.31179	5.21684		2.7866	3.926		1.9855	3.926		3.31179	3.926		2.7866	2.75702		1.9855	2.75702		3.31179	2.75702
9.32957	4.26903		5.20007	4.26903		6.59708	4.26903		9.32957	6.4116		5.20007	6.4116		6.59708	6.4116		9.32957	0.432959		5.20007	0.432959		6.59708	0.432959
6.00787	3.54473		0.62293	3.54473		4.01436	3.54473		6.00787	5.27538		0.62293	5.27538		4.01436	5.27538		6.00787	0.659925		0.62293	0.659925		4.01436	0.659925
6.41058	3.02857		6.81775	3.02857		4.48091	3.02857		6.41058	4.03122		6.81775	4.03122		4.48091	4.03122		6.41058	2.16993		6.81775	2.16993		4.48091	2.16993
5.06824	3.15056		2.9782	3.15056		4.30961	3.15056		5.06824	3.62761		2.9782	3.62761		4.30961	3.62761		5.06824	3.90593		2.9782	3.90593		4.30961	3.90593
5.32157	2.52607		4.99458	2.52607		4.9782	2.52607		5.32157	6.17213		4.99458	6.17213		4.9782	6.17213		5.32157	3.47508		4.99458	3.47508		4.9782	3.47508
6.52732	1.26303		4.05485	1.26303		5.97865	1.26303		6.52732	5.17433		4.05485	5.17433		5.97865	5.17433		6.52732	1.41684		4.05485	1.41684		5.97865	1.41684
1.41143	0.176323		0.238787	0.176323		5.64386	0.176323		1.41143	1.67356		0.238787	1.67356		5.64386	1.67356		1.41143	0.918386		0.238787	0.918386		5.64386	0.918386
8.94348	3.48543		6.9424	3.48543		6.19239	3.48543		8.94348	5.10727		6.9424	5.10727		6.19239	5.10727		8.94348	1.01435		6.9424	1.01435		6.19239	1.01435
9.76129	4.26754		6.9847	4.26754		6.02126	4.26754		9.76129	4.72629		6.9847	4.72629		6.02126	4.72629		9.76129	2.93357		6.9847	2.93357		6.02126	2.93357
9.17869	4.34979		7.21558	4.34979		6.93558	4.34979		9.17869	4.22728		7.21558	4.22728		6.93558	4.22728		9.17869	4.47379		7.21558	4.47379		6.93558	4.47379
7.69627	4.44493		7.79805	4.44493		5.96301	4.44493		7.69627	6.34181		7.79805	6.34181		5.96301	6.34181		7.69627	3.85499		7.79805	3.85499		5.96301	3.85499
9.61717	4.72629		8.77436	4.72629		4.78293	4.72629		9.61717	5.47119		8.77436	5.47119		4.78293	5.47119		9.61717	1.07039		8.77436	1.07039		4.78293	1.07039
9.32607	4.28318		7.37704	4.28318		6.55398	4.28318		9.32607	5.17273		7.37704	5.17273		6.55398	5.17273		9.32607	4.24793		7.37704	4.24793		6.55398	4.24793
0.356144	0.613532		0.137504	0.613532		0.176323	0.613532		0.356144	2.37295		0.137504	2.37295		0.176323	2.37295		0.356144	0.226509		0.137504	0.226509		0.176323	0.226509
0.014355	1.82782		0.042644	1.82782		0	1.82782		0.014355	0.941106		0.042644	0.941106		0	0.941106		0.014355	0.333424		0.042644	0.333424		0	0.333424
3.60288	0.432959		0.389567	0.432959		4.16671	0.432959		3.60288	4.749		0.389567	4.749		4.16671	4.749		3.60288	0.443607		0.389567	0.443607		4.16671	0.443607
7.16742	4.39849		0.495695	4.39849		4.31252	4.39849		7.16742	3.11769		0.495695	3.11769		4.31252	3.11769		7.16742	3.04789		0.495695	3.04789		4.31252	3.04789
0.731183	1.51096		0.400538	1.51096		0.263034	1.51096		0.731183	2.62527		0.400538	2.62527		0.263034	2.62527		0.731183	0.650765		0.400538	0.650765		0.263034	0.650765
8.01976	3.59694		7.7911	3.59694		5.8212	3.59694		8.01976	5.23458		7.7911	5.23458		5.8212	5.23458		8.01976	3.17951		7.7911	3.17951		5.8212	3.17951
8.14792	2.83592		5.77426	2.83592		5.18666	2.83592		8.14792	6.06652		5.77426	6.06652		5.18666	6.06652		8.14792	2.0036		5.77426	2.0036		5.18666	2.0036
1.08406	1.14405		0.176323	1.14405		2.23879	1.14405		1.08406	2.79494		0.176323	2.79494		2.23879	2.79494		1.08406	0.226509		0.176323	0.226509		2.23879	0.226509
8.17053	2.95791		5.8711	2.95791		5.64616	2.95791		8.17053	4.06867		5.8711	4.06867		5.64616	4.06867		8.17053	0.31034		5.8711	0.31034		5.64616	0.31034
8.95948	4.74147		7.80787	4.74147		6.36912	4.74147		8.95948	4.90497		7.80787	4.90497		6.36912	4.90497		8.95948	4.58737		7.80787	4.58737		6.36912	4.58737
4.1635	2.60881		4.83542	2.60881		4.5267	2.60881		4.1635	4.34625		4.83542	4.34625		4.5267	4.34625		4.1635	2.25701		4.83542	2.25701		4.5267	2.25701
5.84499	2.52857		1.74846	2.52857		4.64961	2.52857		5.84499	5.24755		1.74846	5.24755		4.64961	5.24755		5.84499	1.43296		1.74846	1.43296		4.64961	1.43296
1.38405	1.94111		0.536053	1.94111		4.17393	1.94111		1.38405	4.35614		0.536053	4.35614		4.17393	4.35614		1.38405	0.485427		0.536053	0.485427		4.17393	0.485427
8.58819	5.2211		0.790772	5.2211		5.91886	5.2211		8.58819	5.84172		0.790772	5.84172		5.91886	5.84172		8.58819	5.32012		0.790772	5.32012		5.91886	5.32012
0.411426	1.61353		0.124328	1.61353		0.097611	1.61353		0.411426	0.704872		0.124328	0.704872		0.097611	0.704872		0.411426	0.356144		0.124328	0.356144		0.097611	0.356144
1.96717	0.757023		0.214125	0.757023		4.59455	0.757023		1.96717	3.89918		0.214125	3.89918		4.59455	3.89918		1.96717	0.238787		0.214125	0.238787		4.59455	0.238787
0.226509	0		0.485427	0		0	0		0.226509	1.93734		0.485427	1.93734		0	1.93734		0.226509	0.298658		0.485427	0.298658		0	0.298658
6.57984	3.3505		3.10936	3.3505		6.67511	3.3505		6.57984	5.85649		3.10936	5.85649		6.67511	5.85649		6.57984	2.16027		3.10936	2.16027		6.67511	2.16027
3.48929	1.26903		0.189034	1.26903		3.42626	1.26903		3.48929	5.8268		0.189034	5.8268		3.42626	5.8268		3.48929	0.903038		0.189034	0.903038		3.42626	0.903038
4.45615	2.02503		0.250962	2.02503		3.14241	2.02503		4.45615	6.08428		0.250962	6.08428		3.14241	6.08428		4.45615	1.57046		0.250962	1.57046		3.14241	1.57046
8.46438	1.57046		5.40395	1.57046		5.27128	1.57046		8.46438	4.59156		5.40395	4.59156		5.27128	4.59156		8.46438	2.46728		5.40395	2.46728		5.27128	2.46728
1.38957	5.58616		0.650765	5.58616		0.432959	5.58616		1.38957	2.0321		0.650765	2.0321		0.432959	2.0321		1.38957	0.367371		0.650765	0.367371		0.432959	0.367371
5.24336	3.75382		2.75702	3.75382		5.32301	3.75382		5.24336	3.15543		2.75702	3.15543		5.32301	3.15543		5.24336	2.77189		2.75702	2.77189		5.32301	2.77189
2.65535	0.847997		0.887525	0.847997		3.15704	0.847997		2.65535	4.69209		0.887525	4.69209		3.15704	4.69209		2.65535	1.39506		0.887525	1.39506		3.15704	1.39506
2.44095	0.238787		0.097611	0.238787		2.32769	0.238787		2.44095	0.941106		0.097611	0.941106		2.32769	0.941106		2.44095	0.356144		0.097611	0.356144		2.32769	0.356144
7.01759	2.9222		4.04089	2.9222		5.34163	2.9222		7.01759	4.90785		4.04089	4.90785		5.34163	4.90785		7.01759	3.45681		4.04089	3.45681		5.34163	3.45681
2.32193	2.64616		0.62293	2.64616		2.86196	2.64616		2.32193	1.48543		0.62293	1.48543		2.86196	1.48543		2.32193	1.4489		0.62293	1.4489		2.86196	1.4489
8.9323	4.42626		7.608	4.42626		6.58961	4.42626		8.9323	5.72601		7.608	5.72601		6.58961	5.72601		8.9323	3.4343		7.608	3.4343		6.58961	3.4343
2.52105	4.12681		0.124328	4.12681		3.44095	4.12681		2.52105	2.32769		0.124328	2.32769		3.44095	2.32769		2.52105	2.86592		0.124328	2.86592		3.44095	2.86592
3.20789	2.37574		2.70044	2.37574		2.15056	2.37574		3.20789	3.37574		2.70044	3.37574		2.15056	3.37574		3.20789	1.29866		2.70044	1.29866		2.15056	1.29866
8.75719	4.13175		7.54581	4.13175		6.19653	4.13175		8.75719	5.67553		7.54581	5.67553		6.19653	5.67553		8.75719	4.06178		7.54581	4.06178		6.19653	4.06178
6.81391	1.28688		3.89821	1.28688		5.59604	1.28688		6.81391	5.65507		3.89821	5.65507		5.59604	5.65507		6.81391	0.333424		3.89821	0.333424		5.59604	0.333424
9.14565	3.66676		7.3311	3.66676		6.58014	3.66676		9.14565	6.07254		7.3311	6.07254		6.58014	6.07254		9.14565	2.18269		7.3311	2.18269		6.58014	2.18269
3.75382	1.49057		4.70708	1.49057		4.0072	1.49057		3.75382	4.37712		4.70708	4.37712		4.0072	4.37712		3.75382	1.08406		4.70708	1.08406		4.0072	1.08406
0.163499	0.163499		1.54597	0.163499		4.11353	0.163499		0.163499	0.526069		1.54597	0.526069		4.11353	0.526069		0.163499	2.36177		1.54597	2.36177		4.11353	2.36177
4.55152	2.20789		0.594549	2.20789		3.55582	2.20789		4.55152	5.86567		0.594549	5.86567		3.55582	5.86567		4.55152	2.43029		0.594549	2.43029		3.55582	2.43029
0.124328	1.65535		0.214125	1.65535		0.014355	1.65535		0.124328	0.042644		0.214125	0.042644		0.014355	0.042644		0.124328	0.214125		0.214125	0.214125		0.014355	0.214125
1.22651	2.05658		0.321928	2.05658		0.31034	2.05658		1.22651	0.201634		0.321928	0.201634		0.31034	0.201634		1.22651	0.765535		0.321928	0.765535		0.31034	0.765535
4.00899	2.46205		1.20163	2.46205		3.58014	2.46205		4.00899	4.0321		1.20163	4.0321		3.58014	4.0321		4.00899	0.189034		1.20163	0.189034		3.58014	0.189034
0.9855	2.75702		1.27501	2.75702		5.10601	2.75702		0.9855	2.03914		1.27501	2.03914		5.10601	2.03914		0.9855	0.847997		1.27501	0.847997		5.10601	0.847997
4.08661	0.790772		2.27202	0.790772		3.53978	0.790772		4.08661	4.75328		2.27202	4.75328		3.53978	4.75328		4.08661	0.659925		2.27202	0.659925		3.53978	0.659925
4.68706	1.20789		0.275007	1.20789		6.02104	1.20789		4.68706	5.74927		0.275007	5.74927		6.02104	5.74927		4.68706	0.555816		0.275007	0.555816		6.02104	0.555816
9.01156	3.25852		7.19289	3.25852		5.97842	3.25852		9.01156	5.06048		7.19289	5.06048		5.97842	5.06048		9.01156	2.26003		7.19289	2.26003		5.97842	2.26003
7.4614	3.03738		3.98185	3.03738		5.12101	3.03738		7.4614	6.10915		3.98185	6.10915		5.12101	6.10915		7.4614	0.831877		3.98185	0.831877		5.12101	0.831877
1.56072	2.74846		0.748461	2.74846		1.71809	2.74846		1.56072	4.62936		0.748461	4.62936		1.71809	4.62936		1.56072	1.70929		0.748461	1.70929		1.71809	1.70929
7.72799	5.25286		8.50768	5.25286		6.46107	5.25286		7.72799	5.92053		8.50768	5.92053		6.46107	5.92053		7.72799	4.14568		8.50768	4.14568		6.46107	4.14568
1.66448	2.01436		0.356144	2.01436		0.807355	2.01436		1.66448	2.86592		0.356144	2.86592		0.807355	2.86592		1.66448	0.641546		0.356144	0.641546		0.807355	0.641546
4.36457	1.49569		3.55704	1.49569		4.14241	1.49569		4.36457	5.14893		3.55704	5.14893		4.14241	5.14893		4.36457	0.137504		3.55704	0.137504		4.14241	0.137504
0.014355	2.21101		0.014355	2.21101		0	2.21101		0.014355	1.95977		0.014355	1.95977		0	1.95977		0.014355	0.189034		0.014355	0.189034		0	0.189034
0.773996	1.63227		0.176323	1.63227		0.443607	1.63227		0.773996	1.50589		0.176323	1.50589		0.443607	1.50589		0.773996	0.641546		0.176323	0.641546		0.443607	0.641546
5.06781	1.49569		6.26435	1.49569		3.44095	1.49569		5.06781	5.91217		6.26435	5.91217		3.44095	5.91217		5.06781	3.10434		6.26435	3.10434		3.44095	3.10434
4.32409	0.411426		1.25701	0.411426		4.48929	0.411426		4.32409	6.58075		1.25701	6.58075		4.48929	6.58075		4.32409	0.389567		1.25701	0.389567		4.48929	0.389567
8.07703	2.38681		6.15906	2.38681		6.65821	2.38681		8.07703	6.5735		6.15906	6.5735		6.65821	6.5735		8.07703	0.111031		6.15906	0.111031		6.65821	0.111031
0	0.454176		0.163499	0.454176		0	0.454176		0	0.226509		0.163499	0.226509		0	0.226509		0	0.056584		0.163499	0.056584		0	0.056584
3.58376	3.30305		4.36457	3.30305		4.69933	3.30305		3.58376	4.17632		4.36457	4.17632		4.69933	4.17632		3.58376	1.22033		4.36457	1.22033		4.69933	1.22033
6.77479	2.40599		5.07082	2.40599		4.62702	2.40599		6.77479	4.59991		5.07082	4.59991		4.62702	4.59991		6.77479	3.58496		5.07082	3.58496		4.62702	3.58496
7.6222	4.79442		4.43162	4.79442		5.67553	4.79442		7.6222	6.42559		4.43162	6.42559		5.67553	6.42559		7.6222	2.57773		4.43162	2.57773		5.67553	2.57773
2.852	2.90689		1.11103	2.90689		5.24793	2.90689		2.852	4.89627		1.11103	4.89627		5.24793	4.89627		2.852	0.495695		1.11103	0.495695		5.24793	0.495695
7.23487	1.89142		5.79805	1.89142		4.27724	1.89142		7.23487	5.68117		5.79805	5.68117		4.27724	5.68117		7.23487	3.08406		5.79805	3.08406		4.27724	3.08406
7.7662	2.49314		6.58256	2.49314		6.53372	2.49314		7.7662	5.71342		6.58256	5.71342		6.53372	5.71342		7.7662	4.22265		6.58256	4.22265		6.53372	4.22265
9.412	1.83592		7.28021	1.83592		5.19338	1.83592		9.412	3.80116		7.28021	3.80116		5.19338	3.80116		9.412	0.422233		7.28021	0.422233		5.19338	0.422233
5.41853	4.21878		2.34483	4.21878		4.99413	4.21878		5.41853	3.69822		2.34483	3.69822		4.99413	3.69822		5.41853	1		2.34483	1		4.99413	1
1.35614	0.070389		0.176323	0.070389		4.33342	0.070389		1.35614	0.757023		0.176323	0.757023		4.33342	0.757023		1.35614	0.411426		0.176323	0.411426		4.33342	0.411426
6.24184	2.11103		2.43029	2.11103		3.16511	2.11103		6.24184	3.60644		2.43029	3.60644		3.16511	3.60644		6.24184	1.29866		2.43029	1.29866		3.16511	1.29866
9.2647	5.23228		7.64796	5.23228		6.66292	5.23228		9.2647	4.6605		7.64796	4.6605		6.66292	4.6605		9.2647	3.64155		7.64796	3.64155		6.66292	3.64155
8.06205	4.90014		0.739848	4.90014		4.99955	4.90014		8.06205	6.26529		0.739848	6.26529		4.99955	6.26529		8.06205	2.21101		0.739848	2.21101		4.99955	2.21101
8.10292	3.6311		6.2485	3.6311		4.93499	3.6311		8.10292	5.0648		6.2485	5.0648		4.93499	5.0648		8.10292	2.05311		6.2485	2.05311		4.93499	2.05311
7.82286	2.11103		4.26529	2.11103		6.04963	2.11103		7.82286	5.11478		4.26529	5.11478		6.04963	5.11478		7.82286	2.32769		4.26529	2.32769		6.04963	2.32769
2.28983	0.970854		0.238787	0.970854		3.33771	0.970854		2.28983	1.38405		0.238787	1.38405		3.33771	1.38405		2.28983	1.40599		0.238787	1.40599		3.33771	1.40599
2.41954	2.0036		0.475085	2.0036		2.28983	2.0036		2.41954	2.96717		0.475085	2.96717		2.28983	2.96717		2.41954	2.56316		0.475085	2.56316		2.28983	2.56316
5.78816	3.14893		4.90497	3.14893		5.35014	3.14893		5.78816	4.54411		4.90497	4.54411		5.35014	4.54411		5.78816	3.24031		4.90497	3.24031		5.35014	3.24031
5.21607	2.81967		6.23439	2.81967		5.38888	2.81967		5.21607	5.33163		6.23439	5.33163		5.38888	5.33163		5.21607	3.40327		6.23439	3.40327		5.38888	3.40327
0	2.66448		0.014355	2.66448		0	2.66448		0	0.111031		0.014355	0.111031		0	0.111031		0	0.722466		0.014355	0.722466		0	0.722466
9.35966	2.70487		6.51049	2.70487		7.63735	2.70487		9.35966	5.10434		6.51049	5.10434		7.63735	5.10434		9.35966	2.7115		6.51049	2.7115		7.63735	2.7115
5.83491	2.44361		4.59395	2.44361		4.15462	2.44361		5.83491	2.97085		4.59395	2.97085		4.15462	2.97085		5.83491	2.49057		4.59395	2.49057		4.15462	2.49057
4.81506	3.33342		6.92766	3.33342		4.75809	3.33342		4.81506	4.2817		6.92766	4.2817		4.75809	4.2817		4.81506	1.1375		6.92766	1.1375		4.75809	1.1375
3.31325	4.11103		0.028569	4.11103		3.86295	4.11103		3.31325	3.68145		0.028569	3.68145		3.86295	3.68145		3.31325	2.774		0.028569	2.774		3.86295	2.774
0.659925	0.137504		0.275007	0.137504		0.286881	0.137504		0.659925	2.06005		0.275007	2.06005		0.286881	2.06005		0.659925	0.137504		0.275007	0.137504		0.286881	0.137504
7.9991	4.03386		2.93357	4.03386		6.33967	4.03386		7.9991	6.1127		2.93357	6.1127		6.33967	6.1127		7.9991	2.87381		2.93357	2.87381		6.33967	2.87381
8.92321	5.82756		7.89839	5.82756		7.77004	5.82756		8.92321	5.72928		7.89839	5.72928		7.77004	5.72928		8.92321	4.23496		7.89839	4.23496		7.77004	4.23496
2.51096	0.084064		0.201634	0.084064		5.8515	0.084064		2.51096	5.14893		0.201634	5.14893		5.8515	5.14893		2.51096	2.63692		0.201634	2.63692		5.8515	2.63692
0.695994	2.26303		0.124328	2.26303		3.8339	2.26303		0.695994	4.4121		0.124328	4.4121		3.8339	4.4121		0.695994	0.432959		0.124328	0.432959		3.8339	0.432959
7.72007	4.29057		7.75215	4.29057		5.4446	4.29057		7.72007	4.88362		7.75215	4.88362		5.4446	4.88362		7.72007	3.18269		7.75215	3.18269		5.4446	3.18269
0.773996	1.05658		0.189034	1.05658		0.201634	1.05658		0.773996	0.250962		0.189034	0.250962		0.201634	0.250962		0.773996	0.704872		0.189034	0.704872		0.201634	0.704872
2.76128	2.5008		0.516015	2.5008		4.0054	2.5008		2.76128	4.88753		0.516015	4.88753		4.0054	4.88753		2.76128	1.86394		0.516015	1.86394		4.0054	1.86394
5.64299	0.739848		2.86987	0.739848		4.70266	0.739848		5.64299	4.27873		2.86987	4.27873		4.70266	4.27873		5.64299	5.15462		2.86987	5.15462		4.70266	5.15462
0.475085	0.028569		0	0.028569		2.02503	0.028569		0.475085	1.04963		0	1.04963		2.02503	1.04963		0.475085	0.014355		0	0.014355		2.02503	0.014355
0.454176	0.485427		0.15056	0.485427		0.226509	0.485427		0.454176	0.933573		0.15056	0.933573		0.226509	0.933573		0.454176	0.613532		0.15056	0.613532		0.226509	0.613532
0.356144	1.49057		0.097611	1.49057		2.62293	1.49057		0.356144	3.15056		0.097611	3.15056		2.62293	3.15056		0.356144	0.85599		0.097611	0.85599		2.62293	0.85599
4.76128	0.782409		1.61824	0.782409		1.53107	0.782409		4.76128	2.67356		1.61824	2.67356		1.53107	2.67356		4.76128	0.111031		1.61824	0.111031		1.53107	0.111031
2.74631	2.16027		0.014355	2.16027		5.43796	2.16027		2.74631	2.38405		0.014355	2.38405		5.43796	2.38405		2.74631	0.042644		0.014355	0.042644		5.43796	0.042644
6.30396	4.8505		0.903038	4.8505		6.78162	4.8505		6.30396	6.50859		0.903038	6.50859		6.78162	6.50859		6.30396	5.15785		0.903038	5.15785		6.78162	5.15785
3.82985	0.963474		0.495695	0.963474		1.3505	0.963474		3.82985	3.25399		0.495695	3.25399		1.3505	3.25399		3.82985	0.344828		0.495695	0.344828		1.3505	0.344828
0.056584	0.31034		0	0.31034		0	0.31034		0.056584	0.400538		0	0.400538		0	0.400538		0.056584	0.070389		0	0.070389		0	0.070389
1.80736	0.028569		0.713696	0.028569		0.485427	0.028569		1.80736	0.454176		0.713696	0.454176		0.485427	0.454176		1.80736	0.189034		0.713696	0.189034		0.485427	0.189034
2.29278	1.81147		0.111031	1.81147		1.51601	1.81147		2.29278	1.14405		0.111031	1.14405		1.51601	1.14405		2.29278	0.545968		0.111031	0.545968		1.51601	0.545968
6.99186	4.23496		0.367371	4.23496		5.88826	4.23496		6.99186	4.91839		0.367371	4.91839		5.88826	4.91839		6.99186	3.18428		0.367371	3.18428		5.88826	3.18428
0.422233	3.18903		0.201634	3.18903		0.070389	3.18903		0.422233	1.63691		0.201634	1.63691		0.070389	1.63691		0.422233	0.594549		0.201634	0.594549		0.070389	0.594549
6.54365	2.8339		6.65378	2.8339		6.0217	2.8339		6.54365	5.08789		6.65378	5.08789		6.0217	5.08789		6.54365	2.49569		6.65378	2.49569		6.0217	2.49569
6.23534	1.98185		2.49057	1.98185		5.90328	1.98185		6.23534	5.97545		2.49057	5.97545		5.90328	5.97545		6.23534	2.64155		2.49057	2.64155		5.90328	2.64155
0.526069	2.98914		0.214125	2.98914		0.176323	2.98914		0.526069	1.5509		0.214125	1.5509		0.176323	1.5509		0.526069	0.411426		0.214125	0.411426		0.176323	0.411426
8.86028	2.76341		2.73552	2.76341		4.25474	2.76341		8.86028	4.26828		2.73552	4.26828		4.25474	4.26828		8.86028	4.77189		2.73552	4.77189		4.25474	4.77189
7.88411	3.68594		7.02835	3.68594		5.86765	3.68594		7.88411	4.72028		7.02835	4.72028		5.86765	4.72028		7.88411	2.08406		7.02835	2.08406		5.86765	2.08406
5.17193	2.96347		3.82884	2.96347		5.08916	2.96347		5.17193	5.21296		3.82884	5.21296		5.08916	5.21296		5.17193	1.73118		3.82884	1.73118		5.08916	1.73118
10.2639	5.22766		2.34767	5.22766		5.88411	5.22766		10.2639	6.6311		2.34767	6.6311		5.88411	6.6311		10.2639	1.01435		2.34767	1.01435		5.88411	1.01435
7.82337	4.853		6.21704	4.853		6.36317	4.853		7.82337	6.36702		6.21704	6.36702		6.36317	6.36702		7.82337	4.41143		6.21704	4.41143		6.36317	4.41143
8.97599	3.1635		7.84618	3.1635		6.73633	3.1635		8.97599	6.37938		7.84618	6.37938		6.73633	6.37938		8.97599	1.97085		7.84618	1.97085		6.73633	1.97085
7.9689	4.75007		7.58639	4.75007		5.41785	4.75007		7.9689	5.51412		7.58639	5.51412		5.41785	5.51412		7.9689	4.07382		7.58639	4.07382		5.41785	4.07382
5.52607	2.36177		4.38059	2.36177		5.10643	2.36177		5.52607	5.41244		4.38059	5.41244		5.10643	5.41244		5.52607	0.042644		4.38059	0.042644		5.10643	0.042644
5.33199	3.21257		1.57531	3.21257		6.52513	3.21257		5.33199	5.87725		1.57531	5.87725		6.52513	5.87725		5.33199	3.23266		1.57531	3.23266		6.52513	3.23266
10.4487	4.37156		7.89336	4.37156		6.14486	4.37156		10.4487	5.80736		7.89336	5.80736		6.14486	5.80736		10.4487	3.43829		7.89336	3.43829		6.14486	3.43829
0.863938	1.0635		0.238787	1.0635		3.05485	1.0635		0.863938	4.32984		0.238787	4.32984		3.05485	4.32984		0.863938	0.422233		0.238787	0.422233		3.05485	0.422233
5.64472	3.7666		4.17553	3.7666		5.90183	3.7666		5.64472	5.51349		4.17553	5.51349		5.90183	5.51349		5.64472	0.704872		4.17553	0.704872		5.90183	0.704872
6.04854	1.40054		2.51853	1.40054		4.3978	1.40054		6.04854	2.14078		2.51853	2.14078		4.3978	2.14078		6.04854	0.137504		2.51853	0.137504		4.3978	0.137504
9.16297	4.1914		6.85562	4.1914		6.50906	4.1914		9.16297	6.16671		6.85562	6.16671		6.50906	6.16671		9.16297	3.65421		6.85562	3.65421		6.50906	3.65421
7.71521	4.13011		5.60881	4.13011		6.72615	4.13011		7.71521	3.74416		5.60881	3.74416		6.72615	3.74416		7.71521	3.37574		5.60881	3.37574		6.72615	3.37574
4.24413	3.22497		5.59723	3.22497		4.82324	3.22497		4.24413	2.54597		5.59723	2.54597		4.82324	2.54597		4.24413	0.432959		5.59723	0.432959		4.82324	0.432959
6.25039	3.93168		7.02425	3.93168		4.67807	3.93168		6.25039	4.27799		7.02425	4.27799		4.67807	4.27799		6.25039	2.13093		7.02425	2.13093		4.67807	2.13093
5.54133	2.66676		4.86987	2.66676		3.76447	2.66676		5.54133	3.4019		4.86987	3.4019		3.76447	3.4019		5.54133	0.443607		4.86987	0.443607		3.76447	0.443607
4.62	3.63343		1.51096	3.63343		3.99458	3.63343		4.62	5.03122		1.51096	5.03122		3.99458	5.03122		4.62	2.12763		1.51096	2.12763		3.99458	2.12763
4.87086	2.31325		0.31034	2.31325		5.55213	2.31325		4.87086	4.28614		0.31034	4.28614		5.55213	4.28614		4.87086	0.15056		0.31034	0.15056		5.55213	0.15056
6.17333	3.08576		6.27836	3.08576		2.57289	3.08576		6.17333	3.04614		6.27836	3.04614		2.57289	3.04614		6.17333	0.250962		6.27836	0.250962		2.57289	0.250962
0.650765	0.333424		4.09929	0.333424		0.097611	0.333424		0.650765	1.04264		4.09929	1.04264		0.097611	1.04264		0.650765	0.321928		4.09929	0.321928		0.097611	0.321928
5.67271	2.48027		4.1635	2.48027		4.88996	2.48027		5.67271	4.59455		4.1635	4.59455		4.88996	4.59455		5.67271	1.21412		4.1635	1.21412		4.88996	1.21412
6.26828	4.17233		7.13402	4.17233		6.08172	4.17233		6.26828	5.54844		7.13402	5.54844		6.08172	5.54844		6.26828	2.43563		7.13402	2.43563		6.08172	2.43563
7.89427	3.26604		7.6268	3.26604		5.93711	3.26604		7.89427	6.22265		7.6268	6.22265		5.93711	6.22265		7.89427	4.40327		7.6268	4.40327		5.93711	4.40327
9.21856	3.51979		7.3474	3.51979		6.7765	3.51979		9.21856	5.42425		7.3474	5.42425		6.7765	5.42425		9.21856	3.74631		7.3474	3.74631		6.7765	3.74631
8.18537	3.17632		6.78803	3.17632		5.75889	3.17632		8.18537	5.02414		6.78803	5.02414		5.75889	5.02414		8.18537	5.25852		6.78803	5.25852		5.75889	5.25852
9.60025	4.62176		6.80736	4.62176		5.59544	4.62176		9.60025	4.95187		6.80736	4.95187		5.59544	4.95187		9.60025	2.46989		6.80736	2.46989		5.59544	2.46989
6.34305	2.93168		5.71067	2.93168		4.87676	2.93168		6.34305	4.52795		5.71067	4.52795		4.87676	4.52795		6.34305	1.25701		5.71067	1.25701		4.87676	1.25701
0.678072	0.214125		0.097611	0.214125		0.124328	0.214125		0.678072	1.15056		0.097611	1.15056		0.124328	1.15056		0.678072	0.454176		0.097611	0.454176		0.124328	0.454176
1.07724	4.04177		0.356144	4.04177		0.201634	4.04177		1.07724	1.27501		0.356144	1.27501		0.201634	1.27501		1.07724	0.333424		0.356144	0.333424		0.201634	0.333424
0.815575	2.41954		0.097611	2.41954		3.5509	2.41954		0.815575	3.98185		0.097611	3.98185		3.5509	3.98185		0.815575	0.124328		0.097611	0.124328		3.5509	0.124328
7.65964	2.12763		5.07211	2.12763		4.8802	2.12763		7.65964	3.53481		5.07211	3.53481		4.8802	3.53481		7.65964	0.485427		5.07211	0.485427		4.8802	0.485427
0.757023	0.056584		0.831877	0.056584		0.201634	0.056584		0.757023	0.516015		0.831877	0.516015		0.201634	0.516015		0.757023	0.356144		0.831877	0.356144		0.201634	0.356144
7.08842	1.1635		4.07468	1.1635		4.0365	1.1635		7.08842	4.28244		4.07468	4.28244		4.0365	4.28244		7.08842	0.443607		4.07468	0.443607		4.0365	0.443607
9.2266	4.09929		7.60659	4.09929		6.56818	4.09929		9.2266	3.75382		7.60659	3.75382		6.56818	3.75382		9.2266	4.1177		7.60659	4.1177		6.56818	4.1177
9.22306	3.50716		6.91994	3.50716		5.75355	3.50716		9.22306	4.90304		6.91994	4.90304		5.75355	4.90304		9.22306	4.44095		6.91994	4.44095		5.75355	4.44095
4.29131	3.07553		3.80012	3.07553		3.99005	3.07553		4.29131	2.81147		3.80012	2.81147		3.99005	2.81147		4.29131	2.48027		3.80012	2.48027		3.99005	2.48027
5.73931	4.53294		5.59395	4.53294		4.43962	4.53294		5.73931	2.58976		5.59395	2.58976		4.43962	2.58976		5.73931	2.76765		5.59395	2.76765		4.43962	2.76765
4.58496	2.04963		2.01078	2.04963		5.68538	2.04963		4.58496	4.86443		2.01078	4.86443		5.68538	4.86443		4.58496	0.516015		2.01078	0.516015		5.68538	0.516015
1.52105	0.565597		0.565597	0.565597		3.14078	0.565597		1.52105	3.41549		0.565597	3.41549		3.14078	3.41549		1.52105	0.516015		0.565597	0.516015		3.14078	0.516015
5.6946	3.35473		5.74093	3.35473		5.32229	3.35473		5.6946	6.00495		5.74093	6.00495		5.32229	6.00495		5.6946	0.516015		5.74093	0.516015		5.32229	0.516015
3.09424	1.73985		1.30451	1.73985		3.5008	1.73985		3.09424	3.08066		1.30451	3.08066		3.5008	3.08066		3.09424	0.084064		1.30451	0.084064		3.5008	0.084064
0.443607	1.15056		0.042644	1.15056		0.097611	1.15056		0.443607	1.98185		0.042644	1.98185		0.097611	1.98185		0.443607	1.65077		0.042644	1.65077		0.097611	1.65077
0.773996	1.49057		0.31034	1.49057		5.35403	1.49057		0.773996	2.98914		0.31034	2.98914		5.35403	2.98914		0.773996	3.29719		0.31034	3.29719		5.35403	3.29719
10.5179	3.88557		7.36658	3.88557		6.15866	3.88557		10.5179	4.88411		7.36658	4.88411		6.15866	4.88411		10.5179	1.41143		7.36658	1.41143		6.15866	1.41143
9.42821	4.34979		6.85112	4.34979		7.07211	4.34979		9.42821	5.61618		6.85112	5.61618		7.07211	5.61618		9.42821	2.66903		6.85112	2.66903		7.07211	2.66903
5.59066	3.61941		4.95513	3.61941		5.0343	3.61941		5.59066	5.10936		4.95513	5.10936		5.0343	5.10936		5.59066	1.01435		4.95513	1.01435		5.0343	1.01435
6.1035	3.63459		1.73985	3.63459		3.77189	3.63459		6.1035	2.04614		1.73985	2.04614		3.77189	2.04614		6.1035	0.344828		1.73985	0.344828		3.77189	0.344828
5.81916	1.26903		1.5008	1.26903		5.52544	1.26903		5.81916	5.47476		1.5008	5.47476		5.52544	5.47476		5.81916	3.49825		1.5008	3.49825		5.52544	3.49825
7.49298	2.66676		3.24184	2.66676		6.41481	2.66676		7.49298	6.75087		3.24184	6.75087		6.41481	6.75087		7.49298	0.238787		3.24184	0.238787		6.41481	0.238787
0.084064	0.163499		0.014355	0.163499		0	0.163499		0.084064	0.263034		0.014355	0.263034		0	0.263034		0.084064	0.111031		0.014355	0.111031		0	0.111031
6.7339	3.9279		0	3.9279		4.50208	3.9279		6.7339	3.48156		0	3.48156		4.50208	3.48156		6.7339	2.19535		0	2.19535		4.50208	2.19535
8.70387	5.16872		7.83226	5.16872		6.68173	5.16872		8.70387	5.93192		7.83226	5.93192		6.68173	5.93192		8.70387	4.74362		7.83226	4.74362		6.68173	4.74362
9.1576	4.86394		7.0814	4.86394		6.92944	4.86394		9.1576	5.39094		7.0814	5.39094		6.92944	5.39094		9.1576	4.42559		7.0814	4.42559		6.92944	4.42559
7.00865	0.748461		3.44361	0.748461		7.27631	0.748461		7.00865	5.80632		3.44361	5.80632		7.27631	5.80632		7.00865	5.13545		3.44361	5.13545		7.27631	5.13545
0.505891	3.56682		0.124328	3.56682		0.124328	3.56682		0.505891	2.73118		0.124328	2.73118		0.124328	2.73118		0.505891	0.097611		0.124328	0.097611		0.124328	0.097611
9.2379	3.32193		5.66704	3.32193		6.50414	3.32193		9.2379	5.10894		5.66704	5.10894		6.50414	5.10894		9.2379	3.42358		5.66704	3.42358		6.50414	3.42358
9.9577	4.68314		6.10957	4.68314		6.24451	4.68314		9.9577	5.59753		6.10957	5.59753		6.24451	5.59753		9.9577	4.15947		6.10957	4.15947		6.24451	4.15947
9.03631	3.80735		4.21645	3.80735		6.6343	3.80735		9.03631	5.60792		4.21645	5.60792		6.6343	5.60792		9.03631	3.31034		4.21645	3.31034		6.6343	3.31034
6.04439	2.60881		5.19338	2.60881		4.70598	2.60881		6.04439	3.31615		5.19338	3.31615		4.70598	3.31615		6.04439	3.07211		5.19338	3.07211		4.70598	3.07211
2.27202	0.782409		1.52105	0.782409		4.30816	0.782409		2.27202	6.04177		1.52105	6.04177		4.30816	6.04177		2.27202	0.85599		1.52105	0.85599		4.30816	0.85599
8.42417	3.50589		8.16646	3.50589		6.69223	3.50589		8.42417	5.93452		8.16646	5.93452		6.69223	5.93452		8.42417	3.64155		8.16646	3.64155		6.69223	3.64155
7.0091	2.55827		1.12433	2.55827		5.92884	2.55827		7.0091	4.42559		1.12433	4.42559		5.92884	4.42559		7.0091	0.201634		1.12433	0.201634		5.92884	0.201634
5.96509	2.16671		5.98914	2.16671		5.22226	2.16671		5.96509	6.00225		5.98914	6.00225		5.22226	6.00225		5.96509	3.73118		5.98914	3.73118		5.22226	3.73118
9.76966	4.25777		8.28429	4.25777		6.25739	4.25777		9.76966	6.14588		8.28429	6.14588		6.25739	6.14588		9.76966	3.5741		8.28429	3.5741		6.25739	3.5741
0.695994	3.38957		0.189034	3.38957		0.495695	3.38957		0.695994	2.52857		0.189034	2.52857		0.495695	2.52857		0.695994	0.565597		0.189034	0.565597		0.495695	0.565597
7.5411	3.13093		7.66775	3.13093		6.6837	3.13093		7.5411	5.88557		7.66775	5.88557		6.6837	5.88557		7.5411	0.028569		7.66775	0.028569		6.6837	0.028569
6.89154	3.59694		5.61294	3.59694		6.23381	3.59694		6.89154	5.02059		5.61294	5.02059		6.23381	5.02059		6.89154	3.48285		5.61294	3.48285		6.23381	3.48285
9.63505	3.5435		6.75221	3.5435		5.84323	3.5435		9.63505	5.80219		6.75221	5.80219		5.84323	5.80219		9.63505	3.32625		6.75221	3.32625		5.84323	3.32625
0.555816	0.678072		0.189034	0.678072		0.201634	0.678072		0.555816	0.731183		0.189034	0.731183		0.201634	0.731183		0.555816	0.831877		0.189034	0.831877		0.201634	0.831877
0.575312	0.111031		0.189034	0.111031		0.097611	0.111031		0.575312	2.45418		0.189034	2.45418		0.097611	2.45418		0.575312	0.111031		0.189034	0.111031		0.097611	0.111031
6.11562	3.69822		0.454176	3.69822		5.98596	3.69822		6.11562	6.23419		0.454176	6.23419		5.98596	6.23419		6.11562	1.01435		0.454176	1.01435		5.98596	1.01435
6.11041	1.11103		0.847997	1.11103		5.93121	1.11103		6.11041	5.64443		0.847997	5.64443		5.93121	5.64443		6.11041	4.54473		0.847997	4.54473		5.93121	4.54473
7.76049	2.32481		6.61412	2.32481		5.28466	2.32481		7.76049	6.29241		6.61412	6.29241		5.28466	6.29241		7.76049	3.62293		6.61412	3.62293		5.28466	3.62293
0.298658	3.67356		0.124328	3.67356		0.084064	3.67356		0.298658	3.36877		0.124328	3.36877		0.084064	3.36877		0.298658	0.176323		0.124328	0.176323		0.084064	0.176323
3.33342	0.85599		1.81557	0.85599		4.98094	0.85599		3.33342	4.16912		1.81557	4.16912		4.98094	4.16912		3.33342	0.632268		1.81557	0.632268		4.98094	0.632268
8.62669	4.36177		7.87701	4.36177		6.67271	4.36177		8.62669	4.87234		7.87701	4.87234		6.67271	4.87234		8.62669	4.3978		7.87701	4.3978		6.67271	4.3978
2.15381	2.96347		0.097611	2.96347		2.69599	2.96347		2.15381	2.19219		0.097611	2.19219		2.69599	2.19219		2.15381	1.1375		0.097611	1.1375		2.69599	1.1375
8.52411	5.55305		5.79598	5.55305		8.69251	5.55305		8.52411	5.43062		5.79598	5.43062		8.69251	5.43062		8.52411	1.88752		5.79598	1.88752		8.69251	1.88752
5.49217	2.65306		0.15056	2.65306		5.28947	2.65306		5.49217	3.26454		0.15056	3.26454		5.28947	3.26454		5.49217	2.57046		0.15056	2.57046		5.28947	2.57046
0.782409	0.464668		0.137504	0.464668		0.226509	0.464668		0.782409	0.713696		0.137504	0.713696		0.226509	0.713696		0.782409	0.201634		0.137504	0.201634		0.226509	0.201634
7.32319	3.55213		7.66356	3.55213		5.67497	3.55213		7.32319	5.4591		7.66356	5.4591		5.67497	5.4591		7.32319	3.49953		7.66356	3.49953		5.67497	3.49953
1.72683	0.286881		0.454176	0.286881		0.111031	0.286881		1.72683	0.895303		0.454176	0.895303		0.111031	0.895303		1.72683	0.659925		0.454176	0.659925		0.111031	0.659925
1.87971	0.632268		0.831877	0.632268		0.454176	0.632268		1.87971	1.25701		0.831877	1.25701		0.454176	1.25701		1.87971	0.475085		0.831877	0.475085		0.454176	0.475085
3.92315	2.53605		0.111031	2.53605		2.82782	2.53605		3.92315	3.15218		0.111031	3.15218		2.82782	3.15218		3.92315	0.070389		0.111031	0.070389		2.82782	0.070389
7.93993	2.73335		6.45187	2.73335		6.08343	2.73335		7.93993	4.9279		6.45187	4.9279		6.08343	4.9279		7.93993	3.48156		6.45187	3.48156		6.08343	3.48156
9.89189	3.66903		1.0072	3.66903		6.51396	3.66903		9.89189	6.03232		1.0072	6.03232		6.51396	6.03232		9.89189	3.64616		1.0072	3.64616		6.51396	3.64616
8.23774	4.33628		1.59455	4.33628		7.10192	4.33628		8.23774	6.97407		1.59455	6.97407		7.10192	6.97407		8.23774	5.79986		1.59455	5.79986		7.10192	5.79986
2.13093	1.81967		0.298658	1.81967		4.37782	1.81967		2.13093	5.61206		0.298658	5.61206		4.37782	5.61206		2.13093	0.400538		0.298658	0.400538		4.37782	0.400538
8.17133	3.45812		2.06695	3.45812		7.26547	3.45812		8.17133	6.44692		2.06695	6.44692		7.26547	6.44692		8.17133	5.73254		2.06695	5.73254		7.26547	5.73254
5.49506	1.49057		4.06005	1.49057		5.04527	1.49057		5.49506	5.46467		4.06005	5.46467		5.04527	5.46467		5.49506	0.097611		4.06005	0.097611		5.04527	0.097611
4.07553	1.27501		0.333424	1.27501		4.44228	1.27501		4.07553	2.50335		0.333424	2.50335		4.44228	2.50335		4.07553	1.40054		0.333424	1.40054		4.44228	1.40054
0.526069	0.238787		0.124328	0.238787		0.124328	0.238787		0.526069	0.250962		0.124328	0.250962		0.124328	0.250962		0.526069	0.739848		0.124328	0.739848		0.124328	0.739848
1.46467	0.298658		0.669027	0.298658		2.97085	0.298658		1.46467	4.7241		0.669027	4.7241		2.97085	4.7241		1.46467	0.704872		0.669027	0.704872		2.97085	0.704872
6.21626	2.07724		2.90497	2.07724		4.41075	2.07724		6.21626	5.74012		2.90497	5.74012		4.41075	5.74012		6.21626	1.95977		2.90497	1.95977		4.41075	1.95977
0.748461	2.08406		0.163499	2.08406		0.584963	2.08406		0.748461	0.432959		0.163499	0.432959		0.584963	0.432959		0.748461	0.367371		0.163499	0.367371		0.584963	0.367371
8.32486	1.14405		7.99797	1.14405		6.89978	1.14405		8.32486	5.90833		7.99797	5.90833		6.89978	5.90833		8.32486	4.84046		7.99797	4.84046		6.89978	4.84046
0.659925	0.389567		0.263034	0.389567		0.226509	0.389567		0.659925	0.871844		0.263034	0.871844		0.226509	0.871844		0.659925	0.250962		0.263034	0.250962		0.226509	0.250962
4.87381	0.782409		0.367371	0.782409		5.72492	0.782409		4.87381	2.21101		0.367371	2.21101		5.72492	2.21101		4.87381	3.09085		0.367371	3.09085		5.72492	3.09085
1.98914	0.189034		0.189034	0.189034		1.93357	0.189034		1.98914	5.30852		0.189034	5.30852		1.93357	5.30852		1.98914	2.16671		0.189034	2.16671		1.93357	2.16671
6.35332	3.98732		4.41887	3.98732		5.78398	3.98732		6.35332	5.72247		4.41887	5.72247		5.78398	5.72247		6.35332	1.09085		4.41887	1.09085		5.78398	1.09085
4.21413	1.9486		0.298658	1.9486		4.48285	1.9486		4.21413	1.93357		0.298658	1.93357		4.48285	1.93357		4.21413	0.097611		0.298658	0.097611		4.48285	0.097611
1.62761	2.48285		0.475085	2.48285		3.58616	2.48285		1.62761	4.27426		0.475085	4.27426		3.58616	4.27426		1.62761	1.69599		0.475085	1.69599		3.58616	1.69599
9.49993	4.01078		7.81179	4.01078		6.68145	4.01078		9.49993	4.81813		7.81179	4.81813		6.68145	4.81813		9.49993	4.88117		7.81179	4.88117		6.68145	4.88117
7.09687	4.42358		0.505891	4.42358		5.78738	4.42358		7.09687	6.67412		0.505891	6.67412		5.78738	6.67412		7.09687	0.659925		0.505891	0.659925		5.78738	0.659925
7.82184	4.49185		3.20633	4.49185		5.8296	4.49185		7.82184	6.38629		3.20633	6.38629		5.8296	6.38629		7.82184	2.08746		3.20633	2.08746		5.8296	2.08746
0.321928	1.40054		0.163499	1.40054		0.214125	1.40054		0.321928	1.52607		0.163499	1.52607		0.214125	1.52607		0.321928	0.773996		0.163499	0.773996		0.214125	0.773996
2.0072	1.34483		0.757023	1.34483		1.07724	1.34483		2.0072	2.86394		0.757023	2.86394		1.07724	2.86394		2.0072	0.807355		0.757023	0.807355		1.07724	0.807355
1.04264	0.575312		0.070389	0.575312		0.782409	0.575312		1.04264	0.286881		0.070389	0.286881		0.782409	0.286881		1.04264	0.238787		0.070389	0.238787		0.782409	0.238787
5.03122	1.64155		1.56072	1.64155		5.92053	1.64155		5.03122	5.20711		1.56072	5.20711		5.92053	5.20711		5.03122	1.50589		1.56072	1.50589		5.92053	1.50589
2.13422	0.594549		1.58014	0.594549		1.18269	0.594549		2.13422	3.40054		1.58014	3.40054		1.18269	3.40054		2.13422	0.773996		1.58014	0.773996		1.18269	0.773996
8.75084	2.8679		7.61956	2.8679		7.49129	2.8679		8.75084	6.21529		7.61956	6.21529		7.49129	6.21529		8.75084	4.32697		7.61956	4.32697		7.49129	4.32697
9.40765	5.08534		7.27975	5.08534		6.77873	5.08534		9.40765	4.64674		7.27975	4.64674		6.77873	4.64674		9.40765	2.56316		7.27975	2.56316		6.77873	2.56316
1.11103	2.11437		0.214125	2.11437		2.28983	2.11437		1.11103	1.46989		0.214125	1.46989		2.28983	1.46989		1.11103	0.799087		0.214125	0.799087		2.28983	0.799087
1.42223	0.028569		3.36737	0.028569		0.226509	0.028569		1.42223	1.53107		3.36737	1.53107		0.226509	1.53107		1.42223	0.356144		3.36737	0.356144		0.226509	0.356144
9.51905	4.30159		8.88362	4.30159		6.7305	4.30159		9.51905	6.85262		8.88362	6.85262		6.7305	6.85262		9.51905	3.23726		8.88362	3.23726		6.7305	3.23726
0.432959	1.33342		0.124328	1.33342		0.176323	1.33342		0.432959	0.731183		0.124328	0.731183		0.176323	0.731183		0.432959	0.495695		0.124328	0.495695		0.176323	0.495695
8.39	2.7115		7.01903	2.7115		5.12928	2.7115		8.39	7.14659		7.01903	7.14659		5.12928	7.14659		8.39	0.163499		7.01903	0.163499		5.12928	0.163499
8.53341	5.23304		7.57864	5.23304		5.16148	5.23304		8.53341	6.55551		7.57864	6.55551		5.16148	6.55551		8.53341	3.36877		7.57864	3.36877		5.16148	3.36877
7.99582	4.38543		3.28688	4.38543		7.09845	4.38543		7.99582	6.4494		3.28688	6.4494		7.09845	6.4494		7.99582	2.21101		3.28688	2.21101		7.09845	2.21101
1.10434	2.11437		0.275007	2.11437		3.4019	2.11437		1.10434	3.9514		0.275007	3.9514		3.4019	3.9514		1.10434	0.411426		0.275007	0.411426		3.4019	0.411426
3.07039	1.67356		0.124328	1.67356		0.565597	1.67356		3.07039	1.45418		0.124328	1.45418		0.565597	1.45418		3.07039	0.263034		0.124328	0.263034		0.565597	0.263034
6.1035	3.15056		0.495695	3.15056		5.6314	3.15056		6.1035	5.12763		0.495695	5.12763		5.6314	5.12763		6.1035	3.75809		0.495695	3.75809		5.6314	3.75809
1.89918	0.485427		0.422233	0.485427		5.38819	0.485427		1.89918	2.25096		0.422233	2.25096		5.38819	2.25096		1.89918	1.32193		0.422233	1.32193		5.38819	1.32193
1.80323	0.214125		0.475085	0.214125		3.04264	0.214125		1.80323	1.60407		0.475085	1.60407		3.04264	1.60407		1.80323	1.15704		0.475085	1.15704		3.04264	1.15704
4.03034	3.2854		1.33914	3.2854		4.46989	3.2854		4.03034	5.89893		1.33914	5.89893		4.46989	5.89893		4.03034	2.774		1.33914	2.774		4.46989	2.774
1.92979	0.956057		0.389567	0.956057		2.83794	0.956057		1.92979	0.910733		0.389567	0.910733		2.83794	0.910733		1.92979	1.07724		0.389567	1.07724		2.83794	1.07724
7.47111	3		4.83542	3		4.41143	3		7.47111	5.0045		4.83542	5.0045		4.41143	5.0045		7.47111	3.52857		4.83542	3.52857		4.41143	3.52857
0.485427	1.58976		0.201634	1.58976		0.189034	1.58976		0.485427	0.464668		0.201634	0.464668		0.189034	0.464668		0.485427	0.704872		0.201634	0.704872		0.189034	0.704872
0.613532	0.411426		0.056584	0.411426		2.24793	0.411426		0.613532	3.80116		0.056584	3.80116		2.24793	3.80116		0.613532	0.111031		0.056584	0.111031		2.24793	0.111031
8.86635	5.27053		7.72785	5.27053		6.80465	5.27053		8.86635	5.8627		7.72785	5.8627		6.80465	5.8627		8.86635	3.66221		7.72785	3.66221		6.80465	3.66221
4.27426	0.879706		2.05658	0.879706		4.30889	0.879706		4.27426	6.24907		2.05658	6.24907		4.30889	6.24907		4.27426	1.22033		2.05658	1.22033		4.30889	1.22033
8.00236	2.38957		6.43062	2.38957		7.66106	2.38957		8.00236	5.05268		6.43062	5.05268		7.66106	5.05268		8.00236	4.12598		6.43062	4.12598		7.66106	4.12598
8.8953	4.36597		3.96532	4.36597		5.44526	4.36597		8.8953	5.19535		3.96532	5.19535		5.44526	5.19535		8.8953	2.20477		3.96532	2.20477		5.44526	2.20477
9.31762	4.70542		6.35067	4.70542		6.11915	4.70542		9.31762	5.87209		6.35067	5.87209		6.11915	5.87209		9.31762	4.59335		6.35067	4.59335		6.11915	4.59335
0	0.799087		0.014355	0.799087		0	0.799087		0	0.454176		0.014355	0.454176		0	0.454176		0	0.275007		0.014355	0.275007		0	0.275007
6.90881	2.62527		4.31034	2.62527		5.39917	2.62527		6.90881	5.59335		4.31034	5.59335		5.39917	5.59335		6.90881	0.344828		4.31034	0.344828		5.39917	0.344828
3.0072	3.38543		4.26303	3.38543		5.52732	3.38543		3.0072	5.06221		4.26303	5.06221		5.52732	5.06221		3.0072	0.097611		4.26303	0.097611		5.52732	0.097611
5.40293	3.79597		4.13175	3.79597		5.61176	3.79597		5.40293	4.43962		4.13175	4.43962		5.61176	4.43962		5.40293	3.47249		4.13175	3.47249		5.61176	3.47249
4.37156	0.565597		0.432959	0.565597		4.68145	0.565597		4.37156	1.5008		0.432959	1.5008		4.68145	1.5008		4.37156	0.970854		0.432959	0.970854		4.68145	0.970854
0.226509	0.176323		0.163499	0.176323		0.85599	0.176323		0.226509	0.432959		0.163499	0.432959		0.85599	0.432959		0.226509	0.15056		0.163499	0.15056		0.85599	0.15056
0.443607	0.111031		0.163499	0.111031		0.189034	0.111031		0.443607	4.69933		0.163499	4.69933		0.189034	4.69933		0.443607	0.097611		0.163499	0.097611		0.189034	0.097611
2.20789	2.88753		0.15056	2.88753		2.16993	2.88753		2.20789	2.40327		0.15056	2.40327		2.16993	2.40327		2.20789	0.765535		0.15056	0.765535		2.16993	0.765535
5.0072	1.60881		0.757023	1.60881		3.89433	1.60881		5.0072	3.60881		0.757023	3.60881		3.89433	3.60881		5.0072	0.201634		0.757023	0.201634		3.89433	0.201634
6.91229	5.74228		5.29462	5.74228		5.44228	5.74228		6.91229	6.02215		5.29462	6.02215		5.44228	6.02215		6.91229	2.98368		5.29462	2.98368		5.44228	2.98368
2.11103	0.669027		0.545968	0.669027		3.86592	0.669027		2.11103	3.65535		0.545968	3.65535		3.86592	3.65535		2.11103	1.848		0.545968	1.848		3.86592	1.848
3.70819	0.831877		1.07039	0.831877		2.64155	0.831877		3.70819	0.956057		1.07039	0.956057		2.64155	0.956057		3.70819	0.713696		1.07039	0.713696		2.64155	0.713696
0.286881	2.61589		0.201634	2.61589		0.137504	2.61589		0.286881	0.765535		0.201634	0.765535		0.137504	0.765535		0.286881	0.124328		0.201634	0.124328		0.137504	0.124328
7.92351	4.63169		6.89615	4.63169		5.83264	4.63169		7.92351	4.94533		6.89615	4.94533		5.83264	4.94533		7.92351	2.51853		6.89615	2.51853		5.83264	2.51853
0.604071	0.124328		0.333424	0.124328		0.201634	0.124328		0.604071	2.19535		0.333424	2.19535		0.201634	2.19535		0.604071	0.83996		0.333424	0.83996		0.201634	0.83996
1.85599	2.88947		0.443607	2.88947		4.60999	2.88947		1.85599	5.05094		0.443607	5.05094		4.60999	5.05094		1.85599	0.286881		0.443607	0.286881		4.60999	0.286881
2.22033	1.59932		5.64068	1.59932		2.73985	1.59932		2.22033	1.5008		5.64068	1.5008		2.73985	1.5008		2.22033	0.201634		5.64068	0.201634		2.73985	0.201634
7.71521	3.87578		3.22959	3.87578		6.76832	3.87578		7.71521	5.95024		3.22959	5.95024		6.76832	5.95024		7.71521	3.9486		3.22959	3.9486		6.76832	3.9486
11.7085	5.53138		8.84012	5.53138		6.66121	5.53138		11.7085	5.33664		8.84012	5.33664		6.66121	5.33664		11.7085	4.59156		8.84012	4.59156		6.66121	4.59156
7.78097	3.64846		6.36999	3.64846		4.98185	3.64846		7.78097	4.57954		6.36999	4.57954		4.98185	4.57954		7.78097	3.01614		6.36999	3.01614		4.98185	3.01614
5.44956	2.68257		0.275007	2.68257		3.6565	2.68257		5.44956	3.37016		0.275007	3.37016		3.6565	3.37016		5.44956	2.46989		0.275007	2.46989		3.6565	2.46989
7.13955	3.14405		5.81865	3.14405		4.72846	3.14405		7.13955	3.43563		5.81865	3.43563		4.72846	3.43563		7.13955	1.96717		5.81865	1.96717		4.72846	1.96717
6.83819	3.88947		7.98242	3.88947		4.87086	3.88947		6.83819	4.72083		7.98242	4.72083		4.87086	4.72083		6.83819	1.49569		7.98242	1.49569		4.87086	1.49569
0	0.042644		0.097611	0.042644		0.028569	0.042644		0	1.81967		0.097611	1.81967		0.028569	1.81967		0	0.15056		0.097611	0.15056		0.028569	0.15056
8.61993	3.76871		3.87184	3.76871		4.24336	3.76871		8.61993	3.6017		3.87184	3.6017		4.24336	3.6017		8.61993	3.48414		3.87184	3.48414		4.24336	3.48414
5.51475	1.37851		0.028569	1.37851		6.30415	1.37851		5.51475	3.44228		0.028569	3.44228		6.30415	3.44228		5.51475	3.33199		0.028569	3.33199		6.30415	3.33199
7.98749	2.23573		6.75449	2.23573		6.11728	2.23573		7.98749	5.75889		6.75449	5.75889		6.11728	5.75889		7.98749	3.87676		6.75449	3.87676		6.11728	3.87676
7.94942	2.5435		4.91695	2.5435		5.42727	2.5435		7.94942	5.08279		4.91695	5.08279		5.42727	5.08279		7.94942	3.03034		4.91695	3.03034		5.42727	3.03034
6.45976	2.16671		3.94579	2.16671		4.58195	2.16671		6.45976	4.44162		3.94579	4.44162		4.58195	4.44162		6.45976	2.42761		3.94579	2.42761		4.58195	2.42761
9.36144	3.54473		7.00574	3.54473		6.21645	3.54473		9.36144	5.70874		7.00574	5.70874		6.21645	5.70874		9.36144	2.88557		7.00574	2.88557		6.21645	2.88557
1.02148	0.137504		0.333424	0.137504		0.298658	0.137504		1.02148	3.16189		0.333424	3.16189		0.298658	3.16189		1.02148	0.344828		0.333424	0.344828		0.298658	0.344828
2.69822	0.613532		0	0.613532		2.854	0.613532		2.69822	4.50271		0	4.50271		2.854	4.50271		2.69822	0.028569		0	0.028569		2.854	0.028569
7.42274	3.31179		4.82528	3.31179		5.60585	3.31179		7.42274	5.04702		4.82528	5.04702		5.60585	5.04702		7.42274	1.79494		4.82528	1.79494		5.60585	1.79494
8.07296	3.62877		7.05039	3.62877		4.3799	3.62877		8.07296	5.57228		7.05039	5.57228		4.3799	5.57228		8.07296	3.51096		7.05039	3.51096		4.3799	3.51096
6.04745	3.91073		5.40633	3.91073		7.25767	3.91073		6.04745	4.70929		5.40633	4.70929		7.25767	4.70929		6.04745	1.20163		5.40633	1.20163		7.25767	1.20163
2.55827	2.70929		0.411426	2.70929		3.97911	2.70929		2.55827	5.51916		0.411426	5.51916		3.97911	5.51916		2.55827	0.454176		0.411426	0.454176		3.97911	0.454176
10.0365	4.48349		7.51633	4.48349		6.77808	4.48349		10.0365	5.05918		7.51633	5.05918		6.77808	5.05918		10.0365	4.26828		7.51633	4.26828		6.77808	4.26828
7.00169	3.76765		4.95699	3.76765		5.04264	3.76765		7.00169	6.80284		4.95699	6.80284		5.04264	6.80284		7.00169	2.71589		4.95699	2.71589		5.04264	2.71589
4.27053	2.0072		2.90304	2.0072		5.30195	2.0072		4.27053	2.488		2.90304	2.488		5.30195	2.488		4.27053	2.59694		2.90304	2.59694		5.30195	2.59694
6.51033	1.82375		0.214125	1.82375		5.40463	1.82375		6.51033	5.64789		0.214125	5.64789		5.40463	5.64789		6.51033	4.44758		0.214125	4.44758		5.40463	4.44758
6.99662	3.51096		4.86047	3.51096		6.5697	3.51096		6.99662	7.78175		4.86047	7.78175		6.5697	7.78175		6.99662	4.75168		4.86047	4.75168		6.5697	4.75168
0.807355	2.86987		0.378512	2.86987		0.163499	2.86987		0.807355	1.90689		0.378512	1.90689		0.163499	1.90689		0.807355	1.0072		0.378512	1.0072		0.163499	1.0072
5.65105	4.23343		7.47403	4.23343		5.57954	4.23343		5.65105	3.60644		7.47403	3.60644		5.57954	3.60644		5.65105	3.17313		7.47403	3.17313		5.57954	3.17313
7.28457	2.854		5.34767	2.854		5.02636	2.854		7.28457	4.14486		5.34767	4.14486		5.02636	4.14486		7.28457	2.45154		5.34767	2.45154		5.02636	2.45154
0.956057	2.60881		3.67243	2.60881		5.03518	2.60881		0.956057	4.60407		3.67243	4.60407		5.03518	4.60407		0.956057	0.62293		3.67243	0.62293		5.03518	0.62293
6.12288	2.99458		0.344828	2.99458		5.55643	2.99458		6.12288	3.41954		0.344828	3.41954		5.55643	3.41954		6.12288	0.238787		0.344828	0.238787		5.55643	0.238787
7.89899	2.68257		5.88582	2.68257		4.95884	2.68257		7.89899	4.33342		5.88582	4.33342		4.95884	4.33342		7.89899	2.4489		5.88582	2.4489		4.95884	2.4489
2.37851	0.344828		3.80116	0.344828		0.014355	0.344828		2.37851	1.92979		3.80116	1.92979		0.014355	1.92979		2.37851	0.641546		3.80116	0.641546		0.014355	0.641546
5.60081	3.60881		5.91313	3.60881		4.96532	3.60881		5.60081	4.8846		5.91313	4.8846		4.96532	4.8846		5.60081	0.263034		5.91313	0.263034		4.96532	0.263034
3.90111	3.35191		0.970854	3.35191		4.13668	3.35191		3.90111	5.21413		0.970854	5.21413		4.13668	5.21413		3.90111	1.04264		0.970854	1.04264		4.13668	1.04264
0.028569	2.47249		0	2.47249		0.807355	2.47249		0.028569	4.40463		0	4.40463		0.807355	4.40463		0.028569	0.250962		0	0.250962		0.807355	0.250962
2.89724	0.443607		0.028569	0.443607		2.78031	0.443607		2.89724	2.73552		0.028569	2.73552		2.78031	2.73552		2.89724	1.68706		0.028569	1.68706		2.78031	1.68706
1.1177	0.333424		0.250962	0.333424		0.124328	0.333424		1.1177	0.137504		0.250962	0.137504		0.124328	0.137504		1.1177	0.378512		0.250962	0.378512		0.124328	0.378512
0.526069	0.275007		0.111031	0.275007		5.00944	0.275007		0.526069	3.92315		0.111031	3.92315		5.00944	3.92315		0.526069	0.201634		0.111031	0.201634		5.00944	0.201634
8.15639	3.18903		7.09993	3.18903		5.26566	3.18903		8.15639	5.63401		7.09993	5.63401		5.26566	5.63401		8.15639	2.66448		7.09993	2.66448		5.26566	2.66448
8.82477	4.55336		7.94175	4.55336		7.64753	4.55336		8.82477	6.16611		7.94175	6.16611		7.64753	6.16611		8.82477	4.9644		7.94175	4.9644		7.64753	4.9644
5.54102	2.85599		0.378512	2.85599		5.71342	2.85599		5.54102	3.83289		0.378512	3.83289		5.71342	3.83289		5.54102	0.124328		0.378512	0.124328		5.71342	0.124328
9.08071	4.1416		8.02192	4.1416		6.88862	4.1416		9.08071	5.45418		8.02192	5.45418		6.88862	5.45418		9.08071	4.36036		8.02192	4.36036		6.88862	4.36036
7.94427	4.62819		6.43912	4.62819		5.94509	4.62819		7.94427	6.90099		6.43912	6.90099		5.94509	6.90099		7.94427	4.58556		6.43912	4.58556		5.94509	4.58556
0.014355	0.124328		0.014355	0.124328		0	0.124328		0.014355	0.028569		0.014355	0.028569		0	0.028569		0.014355	0.632268		0.014355	0.632268		0	0.632268
5.05094	4.09761		1.38957	4.09761		6.0555	4.09761		5.05094	3.90014		1.38957	3.90014		6.0555	3.90014		5.05094	3.24793		1.38957	3.24793		6.0555	3.24793
7.73762	2.62761		6.20555	2.62761		6.15644	2.62761		7.73762	5.57652		6.20555	5.57652		6.15644	5.57652		7.73762	4.21101		6.20555	4.21101		6.15644	4.21101
5.61589	2.66221		3.87578	2.66221		5.52857	2.66221		5.61589	5.43962		3.87578	5.43962		5.52857	5.43962		5.61589	0.933573		3.87578	0.933573		5.52857	0.933573
9.4289	3.44361		7.91307	3.44361		6.0268	3.44361		9.4289	4.75061		7.91307	4.75061		6.0268	4.75061		9.4289	3.37156		7.91307	3.37156		6.0268	3.37156
9.14468	3.05832		7.06437	3.05832		4.69877	3.05832		9.14468	5.46303		7.06437	5.46303		4.69877	5.46303		9.14468	1.45418		7.06437	1.45418		4.69877	1.45418
0	0.15056		0.028569	0.15056		0	0.15056		0	0.201634		0.028569	0.201634		0	0.201634		0	0.226509		0.028569	0.226509		0	0.226509
2.0635	1.24489		0.189034	1.24489		1.02857	1.24489		2.0635	0.594549		0.189034	0.594549		1.02857	0.594549		2.0635	0.669027		0.189034	0.669027		1.02857	0.669027
4.50716	2.50589		6.17253	2.50589		3.83592	2.50589		4.50716	4.10518		6.17253	4.10518		3.83592	4.10518		4.50716	1.67807		6.17253	1.67807		3.83592	1.67807
8.14001	4.05918		7.18854	4.05918		6.09908	4.05918		8.14001	4.07039		7.18854	4.07039		6.09908	4.07039		8.14001	1.0072		7.18854	1.0072		6.09908	1.0072
0.879706	0.084064		0.31034	0.084064		0.250962	0.084064		0.879706	2.53605		0.31034	2.53605		0.250962	2.53605		0.879706	0.070389		0.31034	0.070389		0.250962	0.070389
5.39575	3.96901		2.95233	3.96901		4.72955	3.96901		5.39575	5.12557		2.95233	5.12557		4.72955	5.12557		5.39575	0.084064		2.95233	0.084064		4.72955	0.084064
9.21614	3.90977		7.52521	3.90977		7.08587	3.90977		9.21614	5.42995		7.52521	5.42995		7.08587	5.42995		9.21614	4.68538		7.52521	4.68538		7.08587	4.68538
7.79941	0.695994		1.64616	0.695994		5.19849	0.695994		7.79941	3.8339		1.64616	3.8339		5.19849	3.8339		7.79941	4.87627		1.64616	4.87627		5.19849	4.87627
3.80941	1.7866		0.042644	1.7866		4.24031	1.7866		3.80941	3.99729		0.042644	3.99729		4.24031	3.99729		3.80941	0.31034		0.042644	0.31034		4.24031	0.31034
7.18537	3.18428		5.62469	3.18428		5.04483	3.18428		7.18537	6.05463		5.62469	6.05463		5.04483	6.05463		7.18537	2.41414		5.62469	2.41414		5.04483	2.41414
7.61831	4.70487		7.66349	4.70487		5.6343	4.70487		7.61831	7.04516		7.66349	7.04516		5.6343	7.04516		7.61831	2.34483		7.66349	2.34483		5.6343	2.34483
2.42223	2.53107		2.37851	2.53107		4.39506	2.53107		2.42223	3.67016		2.37851	3.67016		4.39506	3.67016		2.42223	3.71918		2.37851	3.71918		4.39506	3.71918
0.695994	0.056584		0.250962	0.056584		0.201634	0.056584		0.695994	2.53854		0.250962	2.53854		0.201634	2.53854		0.695994	0.15056		0.250962	0.15056		0.201634	0.15056
0.978196	0.238787		0.15056	0.238787		0.333424	0.238787		0.978196	0.275007		0.15056	0.275007		0.333424	0.275007		0.978196	0.584963		0.15056	0.584963		0.333424	0.584963
9.72823	4.36387		7.21257	4.36387		6.4746	4.36387		9.72823	5.27575		7.21257	5.27575		6.4746	5.27575		9.72823	4.05485		7.21257	4.05485		6.4746	4.05485
9.74467	3.81967		7.38853	3.81967		7.26332	3.81967		9.74467	4.93074		7.38853	4.93074		7.26332	4.93074		9.74467	4.07125		7.38853	4.07125		7.26332	4.07125
9.48008	4.16832		8.1355	4.16832		6.95327	4.16832		9.48008	4.86493		8.1355	4.86493		6.95327	4.86493		9.48008	4.46663		8.1355	4.46663		6.95327	4.46663
7.92035	2.51853		6.86257	2.51853		5.19967	2.51853		7.92035	4.74953		6.86257	4.74953		5.19967	4.74953		7.92035	2.21101		6.86257	2.21101		5.19967	2.21101
8.43554	3.90881		7.43854	3.90881		6.15158	3.90881		8.43554	6.15482		7.43854	6.15482		6.15158	6.15482		8.43554	3.0018		7.43854	3.0018		6.15158	3.0018
8.94533	2.49314		6.35103	2.49314		4.40259	2.49314		8.94533	4.67412		6.35103	4.67412		4.40259	4.67412		8.94533	2.64846		6.35103	2.64846		4.40259	2.64846
7.53574	2.57289		2.8953	2.57289		4.93263	2.57289		7.53574	4.7126		2.8953	4.7126		4.93263	4.7126		7.53574	3.11936		2.8953	3.11936		4.93263	3.11936
0.028569	0.028569		0	0.028569		0.124328	0.028569		0.028569	0.189034		0	0.189034		0.124328	0.189034		0.028569	0.042644		0	0.042644		0.124328	0.042644
4.57107	4.63575		2.23573	4.63575		4.48993	4.63575		4.57107	4.51791		2.23573	4.51791		4.48993	4.51791		4.57107	4.41007		2.23573	4.41007		4.48993	4.41007
0.485427	3.79077		0.084064	3.79077		0.084064	3.79077		0.485427	2.23266		0.084064	2.23266		0.084064	2.23266		0.485427	0.731183		0.084064	0.731183		0.084064	0.731183
3.88753	1.852		2.854	1.852		4.49249	1.852		3.88753	3.08066		2.854	3.08066		4.49249	3.08066		3.88753	1.28096		2.854	1.28096		4.49249	1.28096
8.38948	3.34341		6.52011	3.34341		5.40769	3.34341		8.38948	5.36001		6.52011	5.36001		5.40769	5.36001		8.38948	3.42223		6.52011	3.42223		5.40769	3.42223
4.79494	3.28983		2.76553	3.28983		6.14364	3.28983		4.79494	5.56682		2.76553	5.56682		6.14364	5.56682		4.79494	1.46989		2.76553	1.46989		6.14364	1.46989
0.378512	0.097611		0.189034	0.097611		0.070389	0.097611		0.378512	1.30451		0.189034	1.30451		0.070389	1.30451		0.378512	0.275007		0.189034	0.275007		0.070389	0.275007
4.08746	2.90497		3.3978	2.90497		5.09592	2.90497		4.08746	5.87061		3.3978	5.87061		5.09592	5.87061		4.08746	0.014355		3.3978	0.014355		5.09592	0.014355
0.704872	2.91265		0.298658	2.91265		0.238787	2.91265		0.704872	0.238787		0.298658	0.238787		0.238787	0.238787		0.704872	0.15056		0.298658	0.15056		0.238787	0.15056
1.91073	1.76128		0.214125	1.76128		4.29425	1.76128		1.91073	1.91073		0.214125	1.91073		4.29425	1.91073		1.91073	1.0072		0.214125	1.0072		4.29425	1.0072
6.97922	0.757023		0.918386	0.757023		3.10098	0.757023		6.97922	4.26003		0.918386	4.26003		3.10098	4.26003		6.97922	3.72901		0.918386	3.72901		3.10098	3.72901
3.59932	1.9782		4.79181	1.9782		4.57046	1.9782		3.59932	2.68706		4.79181	2.68706		4.57046	2.68706		3.59932	0.286881		4.79181	0.286881		4.57046	0.286881
2.0072	0.056584		0.344828	0.056584		0.584963	0.056584		2.0072	2.27202		0.344828	2.27202		0.584963	2.27202		2.0072	0.111031		0.344828	0.111031		0.584963	0.111031
2.78241	1.61824		4.5656	1.61824		3.93074	1.61824		2.78241	3.47638		4.5656	3.47638		3.93074	3.47638		2.78241	3.61941		4.5656	3.61941		3.93074	3.61941
6.59649	4.11936		6.20183	4.11936		5.22458	4.11936		6.59649	5.66903		6.20183	5.66903		5.22458	5.66903		6.59649	2.53605		6.20183	2.53605		5.22458	2.53605
3.05832	0.163499		3.49697	0.163499		5.18982	0.163499		3.05832	4.70653		3.49697	4.70653		5.18982	4.70653		3.05832	0.613532		3.49697	0.613532		5.18982	0.613532
7.48269	3.57289		7.44062	3.57289		5.2817	3.57289		7.48269	4.17951		7.44062	4.17951		5.2817	4.17951		7.48269	3.85		7.44062	3.85		5.2817	3.85
3.69711	2.95606		3.55336	2.95606		4.69989	2.95606		3.69711	4.16832		3.55336	4.16832		4.69989	4.16832		3.69711	1.90304		3.55336	1.90304		4.69989	1.90304
7.83674	2.73118		6.55443	2.73118		6.21121	2.73118		7.83674	5.8089		6.55443	5.8089		6.21121	5.8089		7.83674	0.250962		6.55443	0.250962		6.21121	0.250962
0.963474	0.042644		0.263034	0.042644		0.201634	0.042644		0.963474	2.27501		0.263034	2.27501		0.201634	2.27501		0.963474	0.526069		0.263034	0.526069		0.201634	0.526069
8.06555	2.74416		6.89603	2.74416		5.51065	2.74416		8.06555	5.41853		6.89603	5.41853		5.51065	5.41853		8.06555	3		6.89603	3		5.51065	3
0.028569	1.70044		0.028569	1.70044		0.070389	1.70044		0.028569	1.94111		0.028569	1.94111		0.070389	1.94111		0.028569	0.097611		0.028569	0.097611		0.070389	0.097611
9.13863	4.0268		6.22612	4.0268		5.1235	4.0268		9.13863	3.1811		6.22612	3.1811		5.1235	3.1811		9.13863	3.34625		6.22612	3.34625		5.1235	3.34625
4.45154	3.57046		1.85599	3.57046		4.5509	3.57046		4.45154	5.5097		1.85599	5.5097		4.5509	5.5097		4.45154	1.3505		1.85599	1.3505		4.5509	1.3505
2.66676	2.80529		0.613532	2.80529		0.15056	2.80529		2.66676	2.98914		0.613532	2.98914		0.15056	2.98914		2.66676	0.263034		0.613532	0.263034		0.15056	0.263034
4.18269	2.50589		2.25399	2.50589		5.83517	2.50589		4.18269	2.52105		2.25399	2.52105		5.83517	2.52105		4.18269	3.51475		2.25399	3.51475		5.83517	3.51475
10.1132	4.56986		8.10266	4.56986		6.488	4.56986		10.1132	7.02669		8.10266	7.02669		6.488	7.02669		10.1132	1.52105		8.10266	1.52105		6.488	1.52105
5.02237	3.43029		0.321928	3.43029		5.66647	3.43029		5.02237	5.39232		0.321928	5.39232		5.66647	5.39232		5.02237	2.54102		0.321928	2.54102		5.66647	2.54102
8.49482	4.56133		6.56423	4.56133		5.48639	4.56133		8.49482	5.95396		6.56423	5.95396		5.48639	5.95396		8.49482	3.86691		6.56423	3.86691		5.48639	3.86691
0.731183	0.356144		1.40054	0.356144		0.111031	0.356144		0.731183	3.74524		1.40054	3.74524		0.111031	3.74524		0.731183	0.344828		1.40054	0.344828		0.111031	0.344828
6.99401	1.73552		3.19849	1.73552		4.64501	1.73552		6.99401	5.43896		3.19849	5.43896		4.64501	5.43896		6.99401	0.765535		3.19849	0.765535		4.64501	0.765535
1.94111	0.516015		0.687061	0.516015		4.50144	0.516015		1.94111	6.03628		0.687061	6.03628		4.50144	6.03628		1.94111	0.263034		0.687061	0.263034		4.50144	0.263034
8.68036	1.20163		7.04155	1.20163		6.13914	1.20163		8.68036	6.03672		7.04155	6.03672		6.13914	6.03672		8.68036	3.79181		7.04155	3.79181		6.13914	3.79181
2.09761	2.95791		0.739848	2.95791		2.82375	2.95791		2.09761	4.69432		0.739848	4.69432		2.82375	4.69432		2.09761	1.49569		0.739848	1.49569		2.82375	1.49569
5.07125	0.176323		2.53107	0.176323		4.11936	0.176323		5.07125	4.65306		2.53107	4.65306		4.11936	4.65306		5.07125	3.0036		2.53107	3.0036		4.11936	3.0036
9.38405	3.38957		7.07243	3.38957		7.55167	3.38957		9.38405	6.0648		7.07243	6.0648		7.55167	6.0648		9.38405	5.65621		7.07243	5.65621		7.55167	5.65621
7.01703	2.65306		7.45072	2.65306		4.79805	2.65306		7.01703	5.11686		7.45072	5.11686		4.79805	5.11686		7.01703	0.545968		7.45072	0.545968		4.79805	0.545968
1.30451	0.097611		0.15056	0.097611		0.978196	0.097611		1.30451	1.60881		0.15056	1.60881		0.978196	1.60881		1.30451	0.367371		0.15056	0.367371		0.978196	0.367371
0.070389	0.613532		0.137504	0.613532		0.238787	0.613532		0.070389	2.28688		0.137504	2.28688		0.238787	2.28688		0.070389	0.070389		0.137504	0.070389		0.238787	0.070389
8.49809	5.44791		4.59515	5.44791		5.28983	5.44791		8.49809	5.86716		4.59515	5.86716		5.28983	5.86716		8.49809	5.15866		4.59515	5.15866		5.28983	5.15866
9.71213	4.51728		7.96203	4.51728		6.7451	4.51728		9.71213	4.7366		7.96203	4.7366		6.7451	4.7366		9.71213	4.52419		7.96203	4.52419		6.7451	4.52419
9.78997	2.93357		7.66541	2.93357		7.07254	2.93357		9.78997	5.81686		7.66541	5.81686		7.07254	5.81686		9.78997	3.41278		7.66541	3.41278		7.07254	3.41278
10.0358	4.49313		6.49729	4.49313		5.58706	4.49313		10.0358	3.05137		6.49729	3.05137		5.58706	3.05137		10.0358	2.68482		6.49729	2.68482		5.58706	2.68482
6.12267	1.87184		6.19239	1.87184		3.30597	1.87184		6.12267	2.66221		6.19239	2.66221		3.30597	2.66221		6.12267	0.992768		6.19239	0.992768		3.30597	0.992768
3.82171	1.7137		0.815575	1.7137		4.43028	1.7137		3.82171	5.6094		0.815575	5.6094		4.43028	5.6094		3.82171	2.8953		0.815575	2.8953		4.43028	2.8953
9.45368	4.19298		6.5	4.19298		5.71727	4.19298		9.45368	5.91145		6.5	5.91145		5.71727	5.91145		9.45368	2.86592		6.5	2.86592		5.71727	2.86592
6.77136	5.5659		4.22188	5.5659		5.92813	5.5659		6.77136	5.19967		4.22188	5.19967		5.92813	5.19967		6.77136	3.03386		4.22188	3.03386		5.92813	3.03386
9.20261	5.07938		6.77096	5.07938		6.8421	5.07938		9.20261	4.82528		6.77096	4.82528		6.8421	4.82528		9.20261	4.50144		6.77096	4.50144		6.8421	4.50144
1.41684	0.641546		0.344828	0.641546		0.773996	0.641546		1.41684	1.02857		0.344828	1.02857		0.773996	1.02857		1.41684	0.356144		0.344828	0.356144		0.773996	0.356144
7.08704	3.34056		1.92979	3.34056		5.91648	3.34056		7.08704	5.29829		1.92979	5.29829		5.91648	5.29829		7.08704	5.749		1.92979	5.749		5.91648	5.749
0.918386	0.250962		0	0.250962		0.028569	0.250962		0.918386	2.14731		0	2.14731		0.028569	2.14731		0.918386	0.042644		0	0.042644		0.028569	0.042644
9.56236	3.36877		5.59902	3.36877		6.16972	3.36877		9.56236	6.9578		5.59902	6.9578		6.16972	6.9578		9.56236	3.1635		5.59902	3.1635		6.16972	3.1635
6.28114	3.72137		6.89845	3.72137		5.49185	3.72137		6.28114	5.89263		6.89845	5.89263		5.49185	5.89263		6.28114	3.65306		6.89845	3.65306		5.49185	3.65306
3.72683	2.69822		2.16993	2.69822		4.7301	2.69822		3.72683	4.86394		2.16993	4.86394		4.7301	4.86394		3.72683	2.02503		2.16993	2.02503		4.7301	2.02503
2.10098	1.04963		0.333424	1.04963		5.06005	1.04963		2.10098	5.52857		0.333424	5.52857		5.06005	5.52857		2.10098	0.978196		0.333424	0.978196		5.06005	0.978196
3.6241	2.87381		0.111031	2.87381		3.51853	2.87381		3.6241	3.19062		0.111031	3.19062		3.51853	3.19062		3.6241	3.4019		0.111031	3.4019		3.51853	3.4019
9.69465	3.26754		7.96728	3.26754		6.79207	3.26754		9.69465	6.04111		7.96728	6.04111		6.79207	6.04111		9.69465	5.14078		7.96728	5.14078		6.79207	5.14078
8.47861	4.42425		7.85624	4.42425		5.27463	4.42425		8.47861	4.72247		7.85624	4.72247		5.27463	4.72247		8.47861	1.57531		7.85624	1.57531		5.27463	1.57531
6.63241	1.84398		4.60999	1.84398		4.42828	1.84398		6.63241	4.48543		4.60999	4.48543		4.42828	4.48543		6.63241	3.97636		4.60999	3.97636		4.42828	3.97636
4.70984	1.99639		5.02724	1.99639		3.83592	1.99639		4.70984	5.09466		5.02724	5.09466		3.83592	5.09466		4.70984	0.925999		5.02724	0.925999		3.83592	0.925999
0.910733	2.55582		0.137504	2.55582		0.555816	2.55582		0.910733	1.22033		0.137504	1.22033		0.555816	1.22033		0.910733	0.111031		0.137504	0.111031		0.555816	0.111031
1.41143	0.443607		1.43829	0.443607		1.08406	0.443607		1.41143	1.33342		1.43829	1.33342		1.08406	1.33342		1.41143	0.475085		1.43829	0.475085		1.08406	0.475085
5.54473	3.45549		2.49314	3.45549		4.21645	3.45549		5.54473	4.59813		2.49314	4.59813		4.21645	4.59813		5.54473	1.62761		2.49314	1.62761		4.21645	1.62761
7.34669	3.2555		4.58737	3.2555		4.58796	3.2555		7.34669	5.41312		4.58737	5.41312		4.58796	5.41312		7.34669	3.79181		4.58737	3.79181		4.58796	3.79181
9.81219	4.0365		7.59029	4.0365		7.10539	4.0365		9.81219	6.79688		7.59029	6.79688		7.10539	6.79688		9.81219	0.565597		7.59029	0.565597		7.10539	0.565597
6.52466	2.66448		6.39609	2.66448		6.04177	2.66448		6.52466	6.47687		6.39609	6.47687		6.04177	6.47687		6.52466	0.536053		6.39609	0.536053		6.04177	0.536053
1.23266	2.21723		0.286881	2.21723		3.55336	2.21723		1.23266	5.06134		0.286881	5.06134		3.55336	5.06134		1.23266	0.505891		0.286881	0.505891		3.55336	0.505891
3.3799	1.98914		0.250962	1.98914		5.58556	1.98914		3.3799	4.14568		0.250962	4.14568		5.58556	4.14568		3.3799	0.056584		0.250962	0.056584		5.58556	0.056584
6.31777	1.26903		3.89821	1.26903		5.56864	1.26903		6.31777	6.1102		3.89821	6.1102		5.56864	6.1102		6.31777	0.505891		3.89821	0.505891		5.56864	0.505891
0.321928	0.097611		0.124328	0.097611		1.3505	0.097611		0.321928	0.704872		0.124328	0.704872		1.3505	0.704872		0.321928	0.422233		0.124328	0.422233		1.3505	0.422233
9.75377	4.01257		7.23506	4.01257		6.25626	4.01257		9.75377	4.91361		7.23506	4.91361		6.25626	4.91361		9.75377	4.09508		7.23506	4.09508		6.25626	4.09508
1.04264	1.52105		0.516015	1.52105		0.250962	1.52105		1.04264	0.356144		0.516015	0.356144		0.250962	0.356144		1.04264	0.704872		0.516015	0.704872		0.250962	0.704872
9.16601	4.75221		7.37929	4.75221		6.66832	4.75221		9.16601	5.26903		7.37929	5.26903		6.66832	5.26903		9.16601	4.44692		7.37929	4.44692		6.66832	4.44692
4.50016	3.02503		0.669027	3.02503		5.01346	3.02503		4.50016	4.03386		0.669027	4.03386		5.01346	4.03386		4.50016	3.65306		0.669027	3.65306		5.01346	3.65306
1.10434	0.250962		0.189034	0.250962		0.263034	0.250962		1.10434	0.475085		0.189034	0.475085		0.263034	0.475085		1.10434	0.704872		0.189034	0.704872		0.263034	0.704872
1.23266	1.58014		0.201634	1.58014		0.555816	1.58014		1.23266	1.69599		0.201634	1.69599		0.555816	1.69599		1.23266	0.028569		0.201634	0.028569		0.555816	0.028569
1.13093	3.10936		0.201634	3.10936		1.78241	3.10936		1.13093	5.2724		0.201634	5.2724		1.78241	5.2724		1.13093	0.823749		0.201634	0.823749		1.78241	0.823749
0.807355	0.584963		0.163499	0.584963		0.263034	0.584963		0.807355	0.815575		0.163499	0.815575		0.263034	0.815575		0.807355	0.925999		0.163499	0.925999		0.263034	0.925999
0.641546	2.14731		0.214125	2.14731		3.59096	2.14731		0.641546	3.41414		0.214125	3.41414		3.59096	3.41414		0.641546	0.097611		0.214125	0.097611		3.59096	0.097611
5.3733	4.33342		6.67751	4.33342		4.90014	4.33342		5.3733	3.91361		6.67751	3.91361		4.90014	3.91361		5.3733	2.57289		6.67751	2.57289		4.90014	2.57289
4.14731	3.96347		0.464668	3.96347		4.48543	3.96347		4.14731	3.848		0.464668	3.848		4.48543	3.848		4.14731	5.30049		0.464668	5.30049		4.48543	5.30049
9.1122	2.27799		7.44087	2.27799		5.47541	2.27799		9.1122	5.52576		7.44087	5.52576		5.47541	5.52576		9.1122	2.50589		7.44087	2.50589		5.47541	2.50589
0.704872	0.097611		2.7866	0.097611		0.124328	0.097611		0.704872	0.678072		2.7866	0.678072		0.124328	0.678072		0.704872	0.704872		2.7866	0.704872		0.124328	0.704872
8.07425	2.99096		4.66676	2.99096		6.8485	2.99096		8.07425	6.50843		4.66676	6.50843		6.8485	6.50843		8.07425	3.47119		4.66676	3.47119		6.8485	3.47119
2.58256	2.21413		1.24489	2.21413		3.26454	2.21413		2.58256	3.89627		1.24489	3.89627		3.26454	3.89627		2.58256	0.028569		1.24489	0.028569		3.26454	0.028569
4.1416	4.28021		0.641546	4.28021		5.33985	4.28021		4.1416	6.67455		0.641546	6.67455		5.33985	6.67455		4.1416	0.422233		0.641546	0.422233		5.33985	0.422233
6.60851	3.58376		5.6946	3.58376		4.58976	3.58376		6.60851	5.6585		5.6946	5.6585		4.58976	5.6585		6.60851	2.08066		5.6946	2.08066		4.58976	2.08066
3.3799	5.05658		0.823749	5.05658		3.8679	5.05658		3.3799	2.83592		0.823749	2.83592		3.8679	2.83592		3.3799	3.12598		0.823749	3.12598		3.8679	3.12598
0.632268	2.70487		0	2.70487		4.18982	2.70487		0.632268	0.575312		0	0.575312		4.18982	0.575312		0.632268	1.0635		0	1.0635		4.18982	1.0635
0.545968	2.31904		0.084064	2.31904		0.15056	2.31904		0.545968	1.76977		0.084064	1.76977		0.15056	1.76977		0.545968	1.0072		0.084064	1.0072		0.15056	1.0072
8.8173	3.84599		5.51412	3.84599		6.32679	3.84599		8.8173	6.52607		5.51412	6.52607		6.32679	6.52607		8.8173	4.39094		5.51412	4.39094		6.32679	4.39094
8.24179	2.49057		6.57954	2.49057		5.02636	2.49057		8.24179	3.14893		6.57954	3.14893		5.02636	3.14893		8.24179	3.58857		6.57954	3.58857		5.02636	3.58857
0.545968	0.757023		0.084064	0.757023		0.286881	0.757023		0.545968	0.176323		0.084064	0.176323		0.286881	0.176323		0.545968	1.09085		0.084064	1.09085		0.286881	1.09085
0.014355	0.189034		0.056584	0.189034		0.028569	0.189034		0.014355	1.42761		0.056584	1.42761		0.028569	1.42761		0.014355	0.31034		0.056584	0.31034		0.028569	0.31034
3.24793	0.584963		2.85	0.584963		3.62877	0.584963		3.24793	4.68818		2.85	4.68818		3.62877	4.68818		3.24793	1.80323		2.85	1.80323		3.62877	1.80323
0.014355	0.879706		0.028569	0.879706		0.042644	0.879706		0.014355	0.378512		0.028569	0.378512		0.042644	0.378512		0.014355	0.014355		0.028569	0.014355		0.042644	0.014355
5.97774	3.74308		6.16732	3.74308		4.69877	3.74308		5.97774	3.59813		6.16732	3.59813		4.69877	3.59813		5.97774	2.67129		6.16732	2.67129		4.69877	2.67129
7.20242	3.02857		7.38888	3.02857		5.85898	3.02857		7.20242	5.53761		7.38888	5.53761		5.85898	5.53761		7.20242	3.04439		7.38888	3.04439		5.85898	3.04439
6.44327	2.66448		5.92813	2.66448		4.14486	2.66448		6.44327	4.68257		5.92813	4.68257		4.14486	4.68257		6.44327	0.85599		5.92813	0.85599		4.14486	0.85599
5.14486	2.3505		6.79883	2.3505		5.10643	2.3505		5.14486	5.44294		6.79883	5.44294		5.10643	5.44294		5.14486	3.904		6.79883	3.904		5.10643	3.904
4.66732	1.26303		1.20163	1.26303		1.87184	1.26303		4.66732	5.849		1.20163	5.849		1.87184	5.849		4.66732	1.12433		1.20163	1.12433		1.87184	1.12433
5.53138	2.28688		0.495695	2.28688		4.851	2.28688		5.53138	6.65693		0.495695	6.65693		4.851	6.65693		5.53138	1.80736		0.495695	1.80736		4.851	1.80736
8.78047	4.17712		5.50684	4.17712		5.58496	4.17712		8.78047	2.81762		5.50684	2.81762		5.58496	2.81762		8.78047	0.475085		5.50684	0.475085		5.58496	0.475085
7.5953	2.14405		5.75516	2.14405		4.90062	2.14405		7.5953	5.41583		5.75516	5.41583		4.90062	5.41583		7.5953	1.18903		5.75516	1.18903		4.90062	1.18903
8.55551	3.71809		6.92481	3.71809		5.10852	3.71809		8.55551	5.55275		6.92481	5.55275		5.10852	5.55275		8.55551	0.485427		6.92481	0.485427		5.10852	0.485427
5.48768	4.8674		1.71809	4.8674		6.34056	4.8674		5.48768	4.44626		1.71809	4.44626		6.34056	4.44626		5.48768	5.08789		1.71809	5.08789		6.34056	5.08789
5.77004	0.85599		5.46205	0.85599		5.10224	0.85599		5.77004	4.16591		5.46205	4.16591		5.10224	4.16591		5.77004	3.62527		5.46205	3.62527		5.10224	3.62527
9.91684	3.79181		8.10098	3.79181		7.16662	3.79181		9.91684	6.78921		8.10098	6.78921		7.16662	6.78921		9.91684	2.46989		8.10098	2.46989		7.16662	2.46989
2.01436	1.40054		1.03562	1.40054		4.43429	1.40054		2.01436	6.30415		1.03562	6.30415		4.43429	6.30415		2.01436	0.584963		1.03562	0.584963		4.43429	0.584963
0.214125	0.823749		0.111031	0.823749		0.163499	0.823749		0.214125	0.389567		0.111031	0.389567		0.163499	0.389567		0.214125	0.516015		0.111031	0.516015		0.163499	0.516015
4.3505	1.53107		4.30012	1.53107		4.20007	1.53107		4.3505	4.10014		4.30012	4.10014		4.20007	4.10014		4.3505	4.02945		4.30012	4.02945		4.20007	4.02945
8.62531	4.10182		4.48349	4.10182		6.65449	4.10182		8.62531	5.55582		4.48349	5.55582		6.65449	5.55582		8.62531	3.45286		4.48349	3.45286		6.65449	3.45286
8.908	3.66221		8.04188	3.66221		6.62629	3.66221		8.908	5.87971		8.04188	5.87971		6.62629	5.87971		8.908	0.594549		8.04188	0.594549		6.62629	0.594549
7.58361	5.06091		6.644	5.06091		5.66959	5.06091		7.58361	6.04614		6.644	6.04614		5.66959	6.04614		7.58361	3.42223		6.644	3.42223		5.66959	3.42223
9.36958	3.12598		6.0237	3.12598		6.61765	3.12598		9.36958	7.07575		6.0237	7.07575		6.61765	7.07575		9.36958	0.650765		6.0237	0.650765		6.61765	0.650765
9.84859	3.59335		7.78136	3.59335		6.88105	3.59335		9.84859	5.49249		7.78136	5.49249		6.88105	5.49249		9.84859	0.084064		7.78136	0.084064		6.88105	0.084064
8.12836	3.65191		7.07254	3.65191		4.65421	3.65191		8.12836	5.13381		7.07254	5.13381		4.65421	5.13381		8.12836	2.98185		7.07254	2.98185		4.65421	2.98185
0	0.014355		0	0.014355		0	0.014355		0	0.887525		0	0.887525		0	0.887525		0	0.042644		0	0.042644		0	0.042644
7.7786	5.06307		6.08704	5.06307		5.56925	5.06307		7.7786	6.1631		6.08704	6.1631		5.56925	6.1631		7.7786	2.33914		6.08704	2.33914		5.56925	2.33914
7.88423	4.11686		7.40318	4.11686		6.63416	4.11686		7.88423	8.05648		7.40318	8.05648		6.63416	8.05648		7.88423	2.41684		7.40318	2.41684		6.63416	2.41684
9.22316	4.23955		7.50263	4.23955		5.75409	4.23955		9.22316	6.26679		7.50263	6.26679		5.75409	6.26679		9.22316	4.55459		7.50263	4.55459		5.75409	4.55459
8.10607	2.25096		6.14016	2.25096		5.31179	2.25096		8.10607	3.99639		6.14016	3.99639		5.31179	3.99639		8.10607	2.41684		6.14016	2.41684		5.31179	2.41684
8.7288	3.3978		7.36317	3.3978		6.67821	3.3978		8.7288	4.27724		7.36317	4.27724		6.67821	4.27724		8.7288	4.12019		7.36317	4.12019		6.67821	4.12019
4.74578	1.852		1.61824	1.852		2.70266	1.852		4.74578	1.61824		1.61824	1.61824		2.70266	1.61824		4.74578	2.12101		1.61824	2.12101		2.70266	2.12101
5.95629	3.14568		4.55336	3.14568		5.39266	3.14568		5.95629	4.75596		4.55336	4.75596		5.39266	4.75596		5.95629	5.10601		4.55336	5.10601		5.39266	5.10601
4.82018	1.12433		3.88362	1.12433		4.55459	1.12433		4.82018	6.69877		3.88362	6.69877		4.55459	6.69877		4.82018	0.604071		3.88362	0.604071		4.55459	0.604071
0.62293	0.831877		0.356144	0.831877		0.214125	0.831877		0.62293	1.1635		0.356144	1.1635		0.214125	1.1635		0.62293	0.650765		0.356144	0.650765		0.214125	0.650765
9.29602	4.2891		6.97934	4.2891		6.23208	4.2891		9.29602	5.65821		6.97934	5.65821		6.23208	5.65821		9.29602	4.63749		6.97934	4.63749		6.23208	4.63749
0.594549	0.201634		0.124328	0.201634		2.60407	0.201634		0.594549	0.641546		0.124328	0.641546		2.60407	0.641546		0.594549	0.422233		0.124328	0.422233		2.60407	0.422233
7.44352	1.848		2.04963	1.848		4.83036	1.848		7.44352	5.14771		2.04963	5.14771		4.83036	5.14771		7.44352	5.03782		2.04963	5.03782		4.83036	5.03782
8.33646	5.40293		7.22207	5.40293		5.89457	5.40293		8.33646	4.70598		7.22207	4.70598		5.89457	4.70598		8.33646	3.74308		7.22207	3.74308		5.89457	3.74308
5.10098	2.43296		6.05918	2.43296		4.55582	2.43296		5.10098	4.70376		6.05918	4.70376		4.55582	4.70376		5.10098	3.09255		6.05918	3.09255		4.55582	3.09255
6.99537	3.11603		6.53232	3.11603		5.55765	3.11603		6.99537	3.27501		6.53232	3.27501		5.55765	3.27501		6.99537	1.07039		6.53232	1.07039		5.55765	1.07039
9.63249	3.78973		4.18745	3.78973		6.56301	3.78973		9.63249	6.06393		4.18745	6.06393		6.56301	6.06393		9.63249	4.85		4.18745	4.85		6.56301	4.85
3.42358	2.27202		0.321928	2.27202		2.86987	2.27202		3.42358	2.79077		0.321928	2.79077		2.86987	2.79077		3.42358	1.13093		0.321928	1.13093		2.86987	1.13093
0.963474	0.687061		0.495695	0.687061		0.344828	0.687061		0.963474	2.31034		0.495695	2.31034		0.344828	2.31034		0.963474	0.084064		0.495695	0.084064		0.344828	0.084064
8.41485	4.13668		7.30743	4.13668		6.04483	4.13668		8.41485	6.34696		7.30743	6.34696		6.04483	6.34696		8.41485	3.59096		7.30743	3.59096		6.04483	3.59096
4.4614	1.79909		2.1375	1.79909		4.14241	1.79909		4.4614	5.29425		2.1375	5.29425		4.14241	5.29425		4.4614	0.250962		2.1375	0.250962		4.14241	0.250962
8.12107	3.7666		6.4591	3.7666		6.12763	3.7666		8.12107	5.46074		6.4591	5.46074		6.12763	5.46074		8.12107	3.14241		6.4591	3.14241		6.12763	3.14241
1.79494	2.59694		0.15056	2.59694		1.88752	2.59694		1.79494	3.51853		0.15056	3.51853		1.88752	3.51853		1.79494	0.084064		0.15056	0.084064		1.88752	0.084064
8.77485	4.25777		5.98413	4.25777		5.38197	4.25777		8.77485	3.21568		5.98413	3.21568		5.38197	3.21568		8.77485	3.48285		5.98413	3.48285		5.38197	3.48285
5.36001	2.8679		5.27761	2.8679		4.64961	2.8679		5.36001	4.20477		5.27761	4.20477		4.64961	4.20477		5.36001	2.73335		5.27761	2.73335		4.64961	2.73335
3.37434	2.71809		2.24184	2.71809		4.94533	2.71809		3.37434	5.30451		2.24184	5.30451		4.94533	5.30451		3.37434	3.86592		2.24184	3.86592		4.94533	3.86592
6.02636	1		4.12184	1		4.41751	1		6.02636	5.41244		4.12184	5.41244		4.41751	5.41244		6.02636	1.74416		4.12184	1.74416		4.41751	1.74416
0.650765	0.863938		0.201634	0.863938		3.68032	0.863938		0.650765	3.63807		0.201634	3.63807		3.68032	3.63807		0.650765	0.070389		0.201634	0.070389		3.68032	0.070389
7.04538	2.88166		5.13011	2.88166		4.87135	2.88166		7.04538	5.40667		5.13011	5.40667		4.87135	5.40667		7.04538	3.13422		5.13011	3.13422		4.87135	3.13422
1.09761	0.056584		0.263034	0.056584		0.189034	0.056584		1.09761	0.722466		0.263034	0.722466		0.189034	0.722466		1.09761	0.298658		0.263034	0.298658		0.189034	0.298658
9.73806	4.22805		8.8197	4.22805		6.53854	4.22805		9.73806	5.53698		8.8197	5.53698		6.53854	5.53698		9.73806	1.44361		8.8197	1.44361		6.53854	1.44361
4.11686	0.042644		0.070389	0.042644		2.54102	0.042644		4.11686	2.9782		0.070389	2.9782		2.54102	2.9782		4.11686	0.367371		0.070389	0.367371		2.54102	0.367371
3.51853	2.09761		0.226509	2.09761		5.1334	2.09761		3.51853	4.27873		0.226509	4.27873		5.1334	4.27873		3.51853	0.85599		0.226509	0.85599		5.1334	0.85599
7.41363	3.33485		6.25908	3.33485		5.24641	3.33485		7.41363	4.86493		6.25908	4.86493		5.24641	4.86493		7.41363	2.56316		6.25908	2.56316		5.24641	2.56316
3.79494	4.02592		0.124328	4.02592		2.82985	4.02592		3.79494	0.731183		0.124328	0.731183		2.82985	0.731183		3.79494	0.757023		0.124328	0.757023		2.82985	0.757023
9.0477	4.06264		6.69877	4.06264		5.50684	4.06264		9.0477	6.031		6.69877	6.031		5.50684	6.031		9.0477	2.73985		6.69877	2.73985		5.50684	2.73985
6.98561	2.7845		0.555816	2.7845		6.43379	2.7845		6.98561	6.13894		0.555816	6.13894		6.43379	6.13894		6.98561	0.526069		0.555816	0.526069		6.43379	0.526069
10.2071	4.41549		7.29103	4.41549		7.0663	4.41549		10.2071	4.68762		7.29103	4.68762		7.0663	4.68762		10.2071	4.60051		7.29103	4.60051		7.0663	4.60051
5.53978	2.5008		1.4489	2.5008		6.13319	2.5008		5.53978	6.17851		1.4489	6.17851		6.13319	6.17851		5.53978	0.903038		1.4489	0.903038		6.13319	0.903038
2.22342	2.11103		0.176323	2.11103		1.44361	2.11103		2.22342	2.12763		0.176323	2.12763		1.44361	2.12763		2.22342	2.24184		0.176323	2.24184		1.44361	2.24184
1.3505	2.93734		0.963474	2.93734		4.488	2.93734		1.3505	5.73715		0.963474	5.73715		4.488	5.73715		1.3505	0.443607		0.963474	0.443607		4.488	0.443607
2.97636	3.31759		0.978196	3.31759		1.89142	3.31759		2.97636	2.67129		0.978196	2.67129		1.89142	2.67129		2.97636	2.08406		0.978196	2.08406		1.89142	2.08406
8.31075	2.19219		6.13525	2.19219		5.06695	2.19219		8.31075	5.02547		6.13525	5.02547		5.06695	5.02547		8.31075	3.73335		6.13525	3.73335		5.06695	3.73335
4.39643	0.214125		0.111031	0.214125		4.63169	0.214125		4.39643	2.41143		0.111031	2.41143		4.63169	2.41143		4.39643	2.03914		0.111031	2.03914		4.63169	2.03914
3.69153	5.31796		4.73552	5.31796		3.06178	5.31796		3.69153	1.71809		4.73552	1.71809		3.06178	1.71809		3.69153	2.56316		4.73552	2.56316		3.06178	2.56316
0.594549	1.91457		0.189034	1.91457		0.189034	1.91457		0.594549	0.871844		0.189034	0.871844		0.189034	0.871844		0.594549	0.956057		0.189034	0.956057		0.189034	0.956057
1.33914	0.275007		0.367371	0.275007		0.584963	0.275007		1.33914	2.37851		0.367371	2.37851		0.584963	2.37851		1.33914	0.056584		0.367371	0.056584		0.584963	0.056584
0.739848	2.7866		0.042644	2.7866		2.58014	2.7866		0.739848	2.95233		0.042644	2.95233		2.58014	2.95233		0.739848	1.80323		0.042644	1.80323		2.58014	1.80323
4.88557	3.69599		1.29278	3.69599		5.0321	3.69599		4.88557	5.40497		1.29278	5.40497		5.0321	5.40497		4.88557	0.356144		1.29278	0.356144		5.0321	0.356144
8.83488	4.67694		7.41083	4.67694		5.61765	4.67694		8.83488	7.07863		7.41083	7.07863		5.61765	7.07863		8.83488	0.226509		7.41083	0.226509		5.61765	0.226509
0.516015	2.60644		0.163499	2.60644		0.214125	2.60644		0.516015	1.70044		0.163499	1.70044		0.214125	1.70044		0.516015	0.722466		0.163499	0.722466		0.214125	0.722466
6.41464	0.831877		0.526069	0.831877		7.24907	0.831877		6.41464	5.67863		0.526069	5.67863		7.24907	5.67863		6.41464	0.124328		0.526069	0.124328		7.24907	0.124328
8.13386	5.20085		7.39197	5.20085		6.19613	5.20085		8.13386	4.63169		7.39197	4.63169		6.19613	4.63169		8.13386	2.97085		7.39197	2.97085		6.19613	2.97085
2.58496	0.286881		0.042644	0.286881		0.111031	0.286881		2.58496	2.26604		0.042644	2.26604		0.111031	2.26604		2.58496	0.176323		0.042644	0.176323		0.111031	0.176323
8.04625	4.53294		3.81967	4.53294		5.58225	4.53294		8.04625	6.01792		3.81967	6.01792		5.58225	6.01792		8.04625	4.86146		3.81967	4.86146		5.58225	4.86146
1.72683	1.02148		0.15056	1.02148		2.03562	1.02148		1.72683	0.367371		0.15056	0.367371		2.03562	0.367371		1.72683	0.070389		0.15056	0.070389		2.03562	0.070389
5.81096	2.82375		6.01926	2.82375		5.75649	2.82375		5.81096	6.78057		6.01926	6.78057		5.75649	6.78057		5.81096	0.970854		6.01926	0.970854		5.75649	0.970854
6.31976	1.25701		0.687061	1.25701		2.40599	1.25701		6.31976	4.84348		0.687061	4.84348		2.40599	4.84348		6.31976	0.124328		0.687061	0.124328		2.40599	0.124328
9.45168	3.96347		5.53792	3.96347		3.8679	3.96347		9.45168	5.09255		5.53792	5.09255		3.8679	5.09255		9.45168	3.52857		5.53792	3.52857		3.8679	3.52857
1.29278	0.344828		0.042644	0.344828		0.226509	0.344828		1.29278	2.26003		0.042644	2.26003		0.226509	2.26003		1.29278	0.214125		0.042644	0.214125		0.226509	0.214125
5.44427	4.90448		2.26303	4.90448		2.74846	4.90448		5.44427	3.2342		2.26303	3.2342		2.74846	3.2342		5.44427	0.604071		2.26303	0.604071		2.74846	0.604071
7.30524	3.04789		2.47768	3.04789		5.89579	3.04789		7.30524	4.61589		2.47768	4.61589		5.89579	4.61589		7.30524	4.39712		2.47768	4.39712		5.89579	4.39712
10.6589	4.02592		8.52011	4.02592		7.50518	4.02592		10.6589	5.40395		8.52011	5.40395		7.50518	5.40395		10.6589	3.49825		8.52011	3.49825		7.50518	3.49825
9.03232	4.0917		7.52591	4.0917		7.01391	4.0917		9.03232	4.82883		7.52591	4.82883		7.01391	4.82883		9.03232	4.15381		7.52591	4.15381		7.01391	4.15381
7.29692	2.95977		6.74308	2.95977		5.57984	2.95977		7.29692	5.47865		6.74308	5.47865		5.57984	5.47865		7.29692	2.24489		6.74308	2.24489		5.57984	2.24489
0.695994	1.12433		0.356144	1.12433		0.176323	1.12433		0.695994	0.321928		0.356144	0.321928		0.176323	0.321928		0.695994	0.815575		0.356144	0.815575		0.176323	0.815575
6.53916	3.31034		4.39575	3.31034		4.39849	3.31034		6.53916	2.99458		4.39575	2.99458		4.39849	2.99458		6.53916	4.02148		4.39575	4.02148		4.39849	4.02148
7.94959	4.11437		7.40582	4.11437		4.7845	4.11437		7.94959	5.93452		7.40582	5.93452		4.7845	5.93452		7.94959	3.36737		7.40582	3.36737		4.7845	3.36737
5.35403	1.36737		4.44228	1.36737		3.98368	1.36737		5.35403	4.60229		4.44228	4.60229		3.98368	4.60229		5.35403	1.99639		4.44228	1.99639		3.98368	1.99639
3.80529	2.75916		0.201634	2.75916		4.25474	2.75916		3.80529	1.72683		0.201634	1.72683		4.25474	1.72683		3.80529	2.78241		0.201634	2.78241		4.25474	2.78241
5.41549	2.29278		2.76765	2.29278		3.83693	2.29278		5.41549	2.93168		2.76765	2.93168		3.83693	2.93168		5.41549	1.49057		2.76765	1.49057		3.83693	1.49057
5.0492	1.21412		2.95606	1.21412		5.0751	1.21412		5.0492	5.45187		2.95606	5.45187		5.0751	5.45187		5.0492	0.604071		2.95606	0.604071		5.0751	0.604071
2.05311	0.790772		0.389567	0.790772		3.11603	0.790772		2.05311	2.848		0.389567	2.848		3.11603	2.848		2.05311	2.50843		0.389567	2.50843		3.11603	2.50843
6.80568	3.488		6.24489	3.488		5.54473	3.488		6.80568	5.15987		6.24489	5.15987		5.54473	5.15987		6.80568	1.7866		6.24489	1.7866		5.54473	1.7866
1.58976	1.852		0.85599	1.852		0.333424	1.852		1.58976	1.69599		0.85599	1.69599		0.333424	1.69599		1.58976	0.871844		0.85599	0.871844		0.333424	0.871844
7.38819	3.69933		6.40497	3.69933		3.58496	3.69933		7.38819	5.03562		6.40497	5.03562		3.58496	5.03562		7.38819	2.20477		6.40497	2.20477		3.58496	2.20477
0.823749	0.042644		1.02148	0.042644		0.505891	0.042644		0.823749	0.704872		1.02148	0.704872		0.505891	0.704872		0.823749	0.687061		1.02148	0.687061		0.505891	0.687061
8.20482	2.67129		5.35226	2.67129		3.56072	2.67129		8.20482	2.90881		5.35226	2.90881		3.56072	2.90881		8.20482	0.970854		5.35226	0.970854		3.56072	0.970854
4.82934	2.88753		3.20789	2.88753		4.76818	2.88753		4.82934	5.55888		3.20789	5.55888		4.76818	5.55888		4.82934	3.16027		3.20789	3.16027		4.76818	3.16027
7.3906	3.35755		2.26303	3.35755		5.1918	3.35755		7.3906	5.55765		2.26303	5.55765		5.1918	5.55765		7.3906	2.48285		2.26303	2.48285		5.1918	2.48285
7.50295	5.26078		6.45467	5.26078		7.31569	5.26078		7.50295	8.4358		6.45467	8.4358		7.31569	8.4358		7.50295	0.526069		6.45467	0.526069		7.31569	0.526069
2.69377	3.23726		0.226509	3.23726		3.99639	3.23726		2.69377	2.11769		0.226509	2.11769		3.99639	2.11769		2.69377	1.23879		0.226509	1.23879		3.99639	1.23879
1.38957	0.097611		0.226509	0.097611		0.443607	0.097611		1.38957	1.33342		0.226509	1.33342		0.443607	1.33342		1.38957	1		0.226509	1		0.443607	1
7.19397	2.51096		6.27389	2.51096		4.15218	2.51096		7.19397	4.88215		6.27389	4.88215		4.15218	4.88215		7.19397	0.799087		6.27389	0.799087		4.15218	0.799087
0.356144	0.286881		0.85599	0.286881		0.124328	0.286881		0.356144	0.084064		0.85599	0.084064		0.124328	0.084064		0.356144	0.367371		0.85599	0.367371		0.124328	0.367371
8.26195	3.60644		5.88972	3.60644		5.7271	3.60644		8.26195	6.10182		5.88972	6.10182		5.7271	6.10182		8.26195	1.09085		5.88972	1.09085		5.7271	1.09085
0	1.33342		0	1.33342		0	1.33342		0	0.014355		0	0.014355		0	0.014355		0	0.111031		0	0.111031		0	0.111031
9.57314	4.49121		7.14832	4.49121		4.77241	4.49121		9.57314	3.40463		7.14832	3.40463		4.77241	3.40463		9.57314	0.584963		7.14832	0.584963		4.77241	0.584963
9.47701	3.36737		7.8416	3.36737		6.02281	3.36737		9.47701	5.44162		7.8416	5.44162		6.02281	5.44162		9.47701	3.04963		7.8416	3.04963		6.02281	3.04963
0.189034	0.321928		0.097611	0.321928		0.137504	0.321928		0.189034	0.367371		0.097611	0.367371		0.137504	0.367371		0.189034	0.163499		0.097611	0.163499		0.137504	0.163499
0.475085	0.084064		0.201634	0.084064		0.250962	0.084064		0.475085	0.298658		0.201634	0.298658		0.250962	0.298658		0.475085	0.422233		0.201634	0.422233		0.250962	0.422233
0.226509	0.137504		0.014355	0.137504		0.014355	0.137504		0.226509	2.38128		0.014355	2.38128		0.014355	2.38128		0.226509	0.632268		0.014355	0.632268		0.014355	0.632268
5.2791	2.6017		4.40803	2.6017		3.00899	2.6017		5.2791	5.64068		4.40803	5.64068		3.00899	5.64068		5.2791	1.08406		4.40803	1.08406		3.00899	1.08406
6.95629	1.21412		0.15056	1.21412		8.34398	1.21412		6.95629	5.27984		0.15056	5.27984		8.34398	5.27984		6.95629	3.07382		0.15056	3.07382		8.34398	3.07382
0.704872	0		1.52607	0		0	0		0.704872	1.33914		1.52607	1.33914		0	1.33914		0.704872	0.084064		1.52607	0.084064		0	0.084064
7.44684	3.51475		6.49153	3.51475		6.21626	3.51475		7.44684	4.42089		6.49153	4.42089		6.21626	4.42089		7.44684	2.06695		6.49153	2.06695		6.21626	2.06695
8.25526	3.88362		6.29149	3.88362		7.38759	3.88362		8.25526	5.88582		6.29149	5.88582		7.38759	5.88582		8.25526	0.895303		6.29149	0.895303		7.38759	0.895303
0.014355	0.604071		0.028569	0.604071		0	0.604071		0.014355	0.584963		0.028569	0.584963		0	0.584963		0.014355	0.042644		0.028569	0.042644		0	0.042644
0.378512	0.400538		0.111031	0.400538		0.176323	0.400538		0.378512	0.454176		0.111031	0.454176		0.176323	0.454176		0.378512	0.641546		0.111031	0.641546		0.176323	0.641546
3.57168	3.96625		1.48026	3.96625		4.02059	3.96625		3.57168	4.35685		1.48026	4.35685		4.02059	4.35685		3.57168	2.90304		1.48026	2.90304		4.02059	2.90304
9.26216	3.87381		7.74698	3.87381		6.15826	3.87381		9.26216	6.26847		7.74698	6.26847		6.15826	6.26847		9.26216	3.95884		7.74698	3.95884		6.15826	3.95884
6.17612	2.89336		0.356144	2.89336		3.45549	2.89336		6.17612	2.32769		0.356144	2.32769		3.45549	2.32769		6.17612	2.64846		0.356144	2.64846		3.45549	2.64846
5.69125	4.50399		1.12433	4.50399		6.0398	4.50399		5.69125	5.95977		1.12433	5.95977		6.0398	5.95977		5.69125	4.29572		1.12433	4.29572		6.0398	4.29572
7.99949	2.9222		6.60125	2.9222		6.58271	2.9222		7.99949	5.28725		6.60125	5.28725		6.58271	5.28725		7.99949	3.73552		6.60125	3.73552		6.58271	3.73552
7.26978	4.01436		6.46924	4.01436		5.42794	4.01436		7.26978	5.81737		6.46924	5.81737		5.42794	5.81737		7.26978	2.22959		6.46924	2.22959		5.42794	2.22959
2.92979	3.58376		1.90689	3.58376		3.31325	3.58376		2.92979	4.56621		1.90689	4.56621		3.31325	4.56621		2.92979	3.42089		1.90689	3.42089		3.31325	3.42089
7.39403	1.81147		5.89579	1.81147		6.07103	1.81147		7.39403	5.21762		5.89579	5.21762		6.07103	5.21762		7.39403	2.27799		5.89579	2.27799		6.07103	2.27799
3.97453	3.13093		2.04963	3.13093		4.32409	3.13093		3.97453	4.94533		2.04963	4.94533		4.32409	4.94533		3.97453	0.214125		2.04963	0.214125		4.32409	0.214125
0.432959	0.070389		0.097611	0.070389		0.137504	0.070389		0.432959	0.704872		0.097611	0.704872		0.137504	0.704872		0.432959	0.464668		0.097611	0.464668		0.137504	0.464668
0.389567	1.20789		0.137504	1.20789		0.250962	1.20789		0.389567	1.73985		0.137504	1.73985		0.250962	1.73985		0.389567	0.704872		0.137504	0.704872		0.250962	0.704872
9.5693	4.38819		7.16872	4.38819		6.11228	4.38819		9.5693	6.24012		7.16872	6.24012		6.11228	6.24012		9.5693	4.21645		7.16872	4.21645		6.11228	4.21645
4.80941	2.60881		0.389567	2.60881		4.33271	2.60881		4.80941	4.68538		0.389567	4.68538		4.33271	4.68538		4.80941	0.111031		0.389567	0.111031		4.33271	0.111031
0.443607	0.344828		0.176323	0.344828		0.124328	0.344828		0.443607	0.378512		0.176323	0.378512		0.124328	0.378512		0.443607	0.111031		0.176323	0.111031		0.124328	0.111031
1.10434	3.40735		0.084064	3.40735		2.40054	3.40735		1.10434	1.22033		0.084064	1.22033		2.40054	1.22033		1.10434	0.344828		0.084064	0.344828		2.40054	0.344828
8.26655	3.26153		7.55873	3.26153		6.04002	3.26153		8.26655	6.65835		7.55873	6.65835		6.04002	6.65835		8.26655	2.63459		7.55873	2.63459		6.04002	2.63459
2.58014	0.495695		0.422233	0.495695		2.74201	0.495695		2.58014	3.26153		0.422233	3.26153		2.74201	3.26153		2.58014	1.42223		0.422233	1.42223		2.74201	1.42223
5.29315	1.62761		0.286881	1.62761		5.2765	1.62761		5.29315	4.75809		0.286881	4.75809		5.2765	4.75809		5.29315	4.75114		0.286881	4.75114		5.2765	4.75114
7.52748	4.86987		7.06447	4.86987		4.66334	4.86987		7.52748	4.34483		7.06447	4.34483		4.66334	4.34483		7.52748	0.505891		7.06447	0.505891		4.66334	0.505891
7.89063	4.25626		4.96993	4.25626		6.88667	4.25626		7.89063	6.43279		4.96993	6.43279		6.88667	6.43279		7.89063	1.73118		4.96993	1.73118		6.88667	1.73118
0.9855	0.286881		0.275007	0.286881		0.163499	0.286881		0.9855	1.11103		0.275007	1.11103		0.163499	1.11103		0.9855	0.545968		0.275007	0.545968		0.163499	0.545968
7.60133	3.1375		5.10643	3.1375		5.95094	3.1375		7.60133	4.08321		5.10643	4.08321		5.95094	4.08321		7.60133	1.68706		5.10643	1.68706		5.95094	1.68706
2.11769	0.933573		1.05658	0.933573		3.82884	0.933573		2.11769	3.18269		1.05658	3.18269		3.82884	3.18269		2.11769	0.097611		1.05658	0.097611		3.82884	0.097611
0.632268	1.95233		1.82375	1.95233		5.72601	1.95233		0.632268	1.1375		1.82375	1.1375		5.72601	1.1375		0.632268	1.4489		1.82375	1.4489		5.72601	1.4489
5.99118	2.33914		2.52105	2.33914		1.77821	2.33914		5.99118	1.28688		2.52105	1.28688		1.77821	1.28688		5.99118	2.07039		2.52105	2.07039		1.77821	2.07039
0.356144	3.1375		0.137504	3.1375		0.124328	3.1375		0.356144	1.38957		0.137504	1.38957		0.124328	1.38957		0.356144	0.678072		0.137504	0.678072		0.124328	0.678072
9.84851	4.35332		6.66192	4.35332		7.33887	4.35332		9.84851	5.45615		6.66192	5.45615		7.33887	5.45615		9.84851	3.926		6.66192	3.926		7.33887	3.926
0.871844	2.88557		0.321928	2.88557		2.78869	2.88557		0.871844	0.400538		0.321928	0.400538		2.78869	0.400538		0.871844	0.263034		0.321928	0.263034		2.78869	0.263034
4.19456	0.042644		0.163499	0.042644		2.52607	0.042644		4.19456	2.64386		0.163499	2.64386		2.52607	2.64386		4.19456	1.0635		0.163499	1.0635		2.52607	1.0635
8.74923	4.24565		6.93817	4.24565		5.92695	4.24565		8.74923	5.62322		6.93817	5.62322		5.92695	5.62322		8.74923	0.163499		6.93817	0.163499		5.92695	0.163499
7.7115	3.10936		5.66277	3.10936		4.89336	3.10936		7.7115	5.31723		5.66277	5.31723		4.89336	5.31723		7.7115	3.08746		5.66277	3.08746		4.89336	3.08746
8.25621	4.1127		6.60615	4.1127		6.01903	4.1127		8.25621	4.05485		6.60615	4.05485		6.01903	4.05485		8.25621	3.35755		6.60615	3.35755		6.01903	3.35755
8.35817	4.91361		4.6893	4.91361		6.90038	4.91361		8.35817	6.71342		4.6893	6.71342		6.90038	6.71342		8.35817	3.28096		4.6893	3.28096		6.90038	3.28096
1.8679	2.9486		0.15056	2.9486		2.86196	2.9486		1.8679	0.604071		0.15056	0.604071		2.86196	0.604071		1.8679	1.23879		0.15056	1.23879		2.86196	1.23879
0.731183	0.084064		0.31034	0.084064		0.214125	0.084064		0.731183	0.189034		0.31034	0.189034		0.214125	0.189034		0.731183	0.356144		0.31034	0.356144		0.214125	0.356144
0.887525	0.15056		0.275007	0.15056		0.226509	0.15056		0.887525	0.659925		0.275007	0.659925		0.226509	0.659925		0.887525	1.49057		0.275007	1.49057		0.226509	1.49057
5.17113	3.6241		4.87529	3.6241		4.64386	3.6241		5.17113	4.98231		4.87529	4.98231		4.64386	4.98231		5.17113	1.97085		4.87529	1.97085		4.64386	1.97085
6.44989	2.69377		4.94205	2.69377		5.17313	2.69377		6.44989	4.74739		4.94205	4.74739		5.17313	4.74739		6.44989	1.67356		4.94205	1.67356		5.17313	1.67356
5.37469	4.26379		2.53605	4.26379		3.60288	4.26379		5.37469	6.21432		2.53605	6.21432		3.60288	6.21432		5.37469	4.11187		2.53605	4.11187		3.60288	4.11187
8.16797	4.1375		7.55949	4.1375		6.67271	4.1375		8.16797	4.46597		7.55949	4.46597		6.67271	4.46597		8.16797	0.85599		7.55949	0.85599		6.67271	0.85599
7.16912	5.25286		1.28096	5.25286		8.6339	5.25286		7.16912	5.92908		1.28096	5.92908		8.6339	5.92908		7.16912	2.76553		1.28096	2.76553		8.6339	2.76553
1.61824	2.36177		1.10434	2.36177		3.56072	2.36177		1.61824	5.07382		1.10434	5.07382		3.56072	5.07382		1.61824	0.275007		1.10434	0.275007		3.56072	0.275007
2.40871	2.55827		0.214125	2.55827		2.82985	2.55827		2.40871	2.18903		0.214125	2.18903		2.82985	2.18903		2.40871	3.39232		0.214125	3.39232		2.82985	3.39232
2.75275	1.59455		1.42761	1.59455		2.53854	1.59455		2.75275	3.39232		1.42761	3.39232		2.53854	3.39232		2.75275	1.18269		1.42761	1.18269		2.53854	1.18269
2.89336	1.68706		0.344828	1.68706		4.853	1.68706		2.89336	4.06695		0.344828	4.06695		4.853	4.06695		2.89336	2.94486		0.344828	2.94486		4.853	2.94486
7.98948	3.99639		6.65864	3.99639		6.07425	3.99639		7.98948	5.98345		6.65864	5.98345		6.07425	5.98345		7.98948	0.014355		6.65864	0.014355		6.07425	0.014355
0.757023	2.49057		0.250962	2.49057		0.992768	2.49057		0.757023	3.45681		0.250962	3.45681		0.992768	3.45681		0.757023	0.555816		0.250962	0.555816		0.992768	0.555816
6.94767	2.74846		0.978196	2.74846		5.67497	2.74846		6.94767	5.53169		0.978196	5.53169		5.67497	5.53169		6.94767	1.35614		0.978196	1.35614		5.67497	1.35614
9.48856	4.83441		6.25115	4.83441		7.08927	4.83441		9.48856	7.33083		6.25115	7.33083		7.08927	7.33083		9.48856	0.695994		6.25115	0.695994		7.08927	0.695994
9.8355	4.83036		7.95327	4.83036		6.78725	4.83036		9.8355	7.38146		7.95327	7.38146		6.78725	7.38146		9.8355	5.05007		7.95327	5.05007		6.78725	5.05007
3.56438	1.01435		0.201634	1.01435		4.31832	1.01435		3.56438	4.7845		0.201634	4.7845		4.31832	4.7845		3.56438	1.64155		0.201634	1.64155		4.31832	1.64155
3.89142	1.60407		4.66277	1.60407		5.83112	1.60407		3.89142	4.22805		4.66277	4.22805		5.83112	4.22805		3.89142	3.75809		4.66277	3.75809		5.83112	3.75809
4.6311	1.56072		1.99639	1.56072		5.64961	1.56072		4.6311	6.90014		1.99639	6.90014		5.64961	6.90014		4.6311	1.12433		1.99639	1.12433		5.64961	1.12433
6.28374	3.37295		6.80323	3.37295		6.53931	3.37295		6.28374	4.95187		6.80323	4.95187		6.53931	4.95187		6.28374	3.64731		6.80323	3.64731		6.53931	3.64731
0.594549	0.226509		0.15056	0.226509		0.189034	0.226509		0.594549	1.85599		0.15056	1.85599		0.189034	1.85599		0.594549	0.823749		0.15056	0.823749		0.189034	0.823749
5.96023	3.57289		4.86987	3.57289		6.28522	3.57289		5.96023	6.23974		4.86987	6.23974		6.28522	6.23974		5.96023	3.80323		4.86987	3.80323		6.28522	3.80323
9.75547	3.42895		7.81506	3.42895		5.06437	3.42895		9.75547	4.08661		7.81506	4.08661		5.06437	4.08661		9.75547	0.454176		7.81506	0.454176		5.06437	0.454176
8.037	4.2555		4.30743	4.2555		7.58616	4.2555		8.037	6.2854		4.30743	6.2854		7.58616	6.2854		8.037	3.27799		4.30743	3.27799		7.58616	3.27799
1.62761	0.505891		0.895303	0.505891		1.38405	0.505891		1.62761	1.47508		0.895303	1.47508		1.38405	1.47508		1.62761	1.36177		0.895303	1.36177		1.38405	1.36177
8.44021	2.45681		5.3572	2.45681		5.42694	2.45681		8.44021	4.97499		5.3572	4.97499		5.42694	4.97499		8.44021	3.80323		5.3572	3.80323		5.42694	3.80323
4.1811	0.137504		2.45154	0.137504		5.33271	0.137504		4.1811	4.55765		2.45154	4.55765		5.33271	4.55765		4.1811	0.584963		2.45154	0.584963		5.33271	0.584963
8.78607	1.63691		6.00113	1.63691		6.23726	1.63691		8.78607	6.51065		6.00113	6.51065		6.23726	6.51065		8.78607	2.86592		6.00113	2.86592		6.23726	2.86592
0.411426	0.176323		1.68257	0.176323		0.084064	0.176323		0.411426	1.04963		1.68257	1.04963		0.084064	1.04963		0.411426	0.137504		1.68257	0.137504		0.084064	0.137504
4.70653	1.70487		3.33056	1.70487		4.82985	1.70487		4.70653	6.21315		3.33056	6.21315		4.82985	6.21315		4.70653	0.970854		3.33056	0.970854		4.82985	0.970854
9.93233	4.10936		6.29002	4.10936		7.23841	4.10936		9.93233	5.77294		6.29002	5.77294		7.23841	5.77294		9.93233	1.83592		6.29002	1.83592		7.23841	1.83592
4.77558	1.85599		2.19219	1.85599		5.90665	1.85599		4.77558	6.71081		2.19219	6.71081		5.90665	6.71081		4.77558	1.0072		2.19219	1.0072		5.90665	1.0072
7.3015	2.72247		5.70432	2.72247		4.34341	2.72247		7.3015	4.50653		5.70432	4.50653		4.34341	4.50653		7.3015	1.61353		5.70432	1.61353		4.34341	1.61353
1.73118	0.097611		0.505891	0.097611		1.30451	0.097611		1.73118	1.39506		0.505891	1.39506		1.30451	1.39506		1.73118	0.545968		0.505891	0.545968		1.30451	0.545968
7.23132	2.89142		6.09022	2.89142		5.79103	2.89142		7.23132	4.73552		6.09022	4.73552		5.79103	4.73552		7.23132	2.16993		6.09022	2.16993		5.79103	2.16993
9.29115	4.18507		8.28734	4.18507		6.893	4.18507		9.29115	5.58376		8.28734	5.58376		6.893	5.58376		9.29115	4.39506		8.28734	4.39506		6.893	4.39506
1.32769	1.03562		1.08406	1.03562		2.64616	1.03562		1.32769	4.3427		1.08406	4.3427		2.64616	4.3427		1.32769	1.24489		1.08406	1.24489		2.64616	1.24489
9.74468	4.28688		7.84128	4.28688		6.65019	4.28688		9.74468	6.35244		7.84128	6.35244		6.65019	6.35244		9.74468	3.89239		7.84128	3.89239		6.65019	3.89239
2.47768	0.992768		1.22651	0.992768		3.39643	0.992768		2.47768	3.61589		1.22651	3.61589		3.39643	3.61589		2.47768	0.333424		1.22651	0.333424		3.39643	0.333424
0.111031	0.014355		0.443607	0.014355		0.084064	0.014355		0.111031	0.925999		0.443607	0.925999		0.084064	0.925999		0.111031	0.137504		0.443607	0.137504		0.084064	0.137504
8.76842	2.53605		5.79129	2.53605		4.53107	2.53605		8.76842	5.12846		5.79129	5.12846		4.53107	5.12846		8.76842	2.50335		5.79129	2.50335		4.53107	2.50335
9.0782	4.03386		8.22463	4.03386		8.09577	4.03386		9.0782	5.72083		8.22463	5.72083		8.09577	5.72083		9.0782	6.09908		8.22463	6.09908		8.09577	6.09908
9.2191	4.09845		7.53737	4.09845		6.51033	4.09845		9.2191	5.12681		7.53737	5.12681		6.51033	5.12681		9.2191	3.73227		7.53737	3.73227		6.51033	3.73227
2.76765	0.111031		0.443607	0.111031		1.04963	0.111031		2.76765	1.29866		0.443607	1.29866		1.04963	1.29866		2.76765	1.18269		0.443607	1.18269		1.04963	1.18269
8.18229	4.88411		3.58496	4.88411		4.45615	4.88411		8.18229	6.06975		3.58496	6.06975		4.45615	6.06975		8.18229	2.79701		3.58496	2.79701		4.45615	2.79701
9.21822	4.26153		8.53103	4.26153		5.67835	4.26153		9.21822	6.27612		8.53103	6.27612		5.67835	6.27612		9.21822	3.42895		8.53103	3.42895		5.67835	3.42895
1.58976	1.05658		0.367371	1.05658		0.555816	1.05658		1.58976	3.62644		0.367371	3.62644		0.555816	3.62644		1.58976	1.08406		0.367371	1.08406		0.555816	1.08406
8.10439	3.99548		6.10056	3.99548		5.30415	3.99548		8.10439	5.0492		6.10056	5.0492		5.30415	5.0492		8.10439	1.10434		6.10056	1.10434		5.30415	1.10434
6.72765	2.42223		7.67673	2.42223		6.42895	2.42223		6.72765	5.05224		7.67673	5.05224		6.42895	5.05224		6.72765	4.35403		7.67673	4.35403		6.42895	4.35403
5.66562	2.90881		3.85997	2.90881		5.26303	2.90881		5.66562	4.42895		3.85997	4.42895		5.26303	4.42895		5.66562	1.85997		3.85997	1.85997		5.26303	1.85997
1.23879	0.137504		3.28392	0.137504		0.201634	0.137504		1.23879	1.34483		3.28392	1.34483		0.201634	1.34483		1.23879	1.68706		3.28392	1.68706		0.201634	1.68706
2.73769	2.98185		0	2.98185		2.21101	2.98185		2.73769	1.80736		0	1.80736		2.21101	1.80736		2.73769	1.81967		0	1.81967		2.21101	1.81967
2.19219	2.37295		0.042644	2.37295		2.31325	2.37295		2.19219	0.263034		0.042644	0.263034		2.31325	0.263034		2.19219	0.604071		0.042644	0.604071		2.31325	0.604071
8.66203	3.37851		5.19928	3.37851		6.69975	3.37851		8.66203	4.853		5.19928	4.853		6.69975	4.853		8.66203	0.238787		5.19928	0.238787		6.69975	0.238787
0.678072	0.495695		0.333424	0.495695		0.201634	0.495695		0.678072	1.24489		0.333424	1.24489		0.201634	1.24489		0.678072	0.575312		0.333424	0.575312		0.201634	0.575312
5.06393	2.34767		5.47768	2.34767		2.78031	2.34767		5.06393	3.30451		5.47768	3.30451		2.78031	3.30451		5.06393	2.23266		5.47768	2.23266		2.78031	2.23266
6.851	4.70321		7.03331	4.70321		5.41346	4.70321		6.851	3.24641		7.03331	3.24641		5.41346	3.24641		6.851	3.54473		7.03331	3.54473		5.41346	3.54473
9.68895	4.99684		7.47452	4.99684		6.67694	4.99684		9.68895	5.41176		7.47452	5.41176		6.67694	5.41176		9.68895	4.33056		7.47452	4.33056		6.67694	4.33056
4.69766	0.176323		0.298658	0.176323		2.32481	0.176323		4.69766	3.79701		0.298658	3.79701		2.32481	3.79701		4.69766	0.925999		0.298658	0.925999		2.32481	0.925999
8.37139	1.9782		0.275007	1.9782		7.51657	1.9782		8.37139	4.65019		0.275007	4.65019		7.51657	4.65019		8.37139	3.8885		0.275007	3.8885		7.51657	3.8885
3.64616	2.33342		0.411426	2.33342		3.30743	2.33342		3.64616	3.76977		0.411426	3.76977		3.30743	3.76977		3.64616	1.16993		0.411426	1.16993		3.30743	1.16993
9.59053	3.49185		7.98334	3.49185		5.76659	3.49185		9.59053	5.40156		7.98334	5.40156		5.76659	5.40156		9.59053	3.98914		7.98334	3.98914		5.76659	3.98914
2.62293	6.90797		0.344828	6.90797		4.6565	6.90797		2.62293	3.59216		0.344828	3.59216		4.6565	3.59216		2.62293	3.26303		0.344828	3.26303		4.6565	3.26303
0.443607	2.57046		0.014355	2.57046		1.49057	2.57046		0.443607	0.641546		0.014355	0.641546		1.49057	0.641546		0.443607	1.04963		0.014355	1.04963		1.49057	1.04963
5.29976	2.75702		4.10769	2.75702		5.99729	2.75702		5.29976	5.63198		4.10769	5.63198		5.99729	5.63198		5.29976	3.77505		4.10769	3.77505		5.99729	3.77505
1.40054	0.545968		0.594549	0.545968		0.443607	0.545968		1.40054	0.970854		0.594549	0.970854		0.443607	0.970854		1.40054	0.250962		0.594549	0.250962		0.443607	0.250962
7.91683	2.93357		6.41768	2.93357		5.1815	2.93357		7.91683	4.8748		6.41768	4.8748		5.1815	4.8748		7.91683	3.47508		6.41768	3.47508		5.1815	3.47508
7.96884	4.76871		6.25908	4.76871		5.88704	4.76871		7.96884	5.80038		6.25908	5.80038		5.88704	5.80038		7.96884	0.831877		6.25908	0.831877		5.88704	0.831877
9.99789	3.92125		7.36833	3.92125		5.45779	3.92125		9.99789	5.8515		7.36833	5.8515		5.45779	5.8515		9.99789	2.28392		7.36833	2.28392		5.45779	2.28392
4.67638	0.807355		0.028569	0.807355		7.39832	0.807355		4.67638	5.05702		0.028569	5.05702		7.39832	5.05702		4.67638	3.67469		0.028569	3.67469		7.39832	3.67469
8.34576	2.75489		5.75382	2.75489		6.27612	2.75489		8.34576	5.44791		5.75382	5.44791		6.27612	5.44791		8.34576	2.68257		5.75382	2.68257		6.27612	2.68257
2.08746	0.321928		2.3978	0.321928		3.23726	0.321928		2.08746	2.74631		2.3978	2.74631		3.23726	2.74631		2.08746	2.04264		2.3978	2.04264		3.23726	2.04264
8.47557	2.79285		5.94181	2.79285		6.19121	2.79285		8.47557	5.44989		5.94181	5.44989		6.19121	5.44989		8.47557	3.06523		5.94181	3.06523		6.19121	3.06523
2.28392	0.344828		0.214125	0.344828		4.01525	0.344828		2.28392	3.17951		0.214125	3.17951		4.01525	3.17951		2.28392	1.36737		0.214125	1.36737		4.01525	1.36737
0.028569	1.81147		0.070389	1.81147		0.163499	1.81147		0.028569	2.39232		0.070389	2.39232		0.163499	2.39232		0.028569	0.056584		0.070389	0.056584		0.163499	0.056584
6.33056	3.28392		6.8786	3.28392		4.56864	3.28392		6.33056	5.26115		6.8786	5.26115		4.56864	5.26115		6.33056	0.632268		6.8786	0.632268		4.56864	0.632268
8.89721	3.19692		4.43962	3.19692		5.75221	3.19692		8.89721	5.24527		4.43962	5.24527		5.75221	5.24527		8.89721	2.86592		4.43962	2.86592		5.75221	2.86592
10.228	4.19771		7.59731	4.19771		8.01586	4.19771		10.228	6.22555		7.59731	6.22555		8.01586	6.22555		10.228	4.18587		7.59731	4.18587		8.01586	4.18587
1.72247	0.650765		1.62761	0.650765		1.61353	0.650765		1.72247	3.21413		1.62761	3.21413		1.61353	3.21413		1.72247	0.765535		1.62761	0.765535		1.61353	0.765535
9.60114	4.6605		7.37773	4.6605		6.71973	4.6605		9.60114	5.10392		7.37773	5.10392		6.71973	5.10392		9.60114	4.41616		7.37773	4.41616		6.71973	4.41616
6.79298	4.46597		0.31034	4.46597		6.64285	4.46597		6.79298	5.31361		0.31034	5.31361		6.64285	5.31361		6.79298	4.69655		0.31034	4.69655		6.64285	4.69655
9.25385	4.74524		8.47675	4.74524		7.73057	4.74524		9.25385	5.28429		8.47675	5.28429		7.73057	5.28429		9.25385	3.76128		8.47675	3.76128		7.73057	3.76128
1.15704	2.91648		0.485427	2.91648		2.48285	2.91648		1.15704	0.695994		0.485427	0.695994		2.48285	0.695994		1.15704	0.941106		0.485427	0.941106		2.48285	0.941106
2.04264	4.36387		0.298658	4.36387		5.82043	4.36387		2.04264	6.43212		0.298658	6.43212		5.82043	6.43212		2.04264	3.48414		0.298658	3.48414		5.82043	3.48414
6.11624	3.60051		5.52607	3.60051		5.11645	3.60051		6.11624	4.35473		5.52607	4.35473		5.11645	4.35473		6.11624	1		5.52607	1		5.11645	1
4.20711	3.4343		6.17872	3.4343		4.92979	3.4343		4.20711	5.97154		6.17872	5.97154		4.92979	5.97154		4.20711	3.46467		6.17872	3.46467		4.92979	3.46467
6.1639	2.08066		3.84197	2.08066		5.95443	2.08066		6.1639	6.09571		3.84197	6.09571		5.95443	6.09571		6.1639	1.03562		3.84197	1.03562		5.95443	1.03562
4.79286	0.773996		2.9782	0.773996		3.52231	0.773996		4.79286	5.03826		2.9782	5.03826		3.52231	5.03826		4.79286	0.124328		2.9782	0.124328		3.52231	0.124328
4.23266	2.43029		5.0387	2.43029		4.56133	2.43029		4.23266	4.15137		5.0387	4.15137		4.56133	4.15137		4.23266	2.926		5.0387	2.926		4.56133	2.926
3.52732	2.44095		2.99277	2.44095		2.83794	2.44095		3.52732	3.05485		2.99277	3.05485		2.83794	3.05485		3.52732	0.189034		2.99277	0.189034		2.83794	0.189034
1.54597	0.298658		0	0.298658		3.06178	0.298658		1.54597	0.31034		0	0.31034		3.06178	0.31034		1.54597	0.201634		0	0.201634		3.06178	0.201634
1.28096	1.02857		0.189034	1.02857		0.298658	1.02857		1.28096	0.847997		0.189034	0.847997		0.298658	0.847997		1.28096	0.443607		0.189034	0.443607		0.298658	0.443607
7.02126	3.17951		6.11686	3.17951		4.54288	3.17951		7.02126	5.76235		6.11686	5.76235		4.54288	5.76235		7.02126	1.42223		6.11686	1.42223		4.54288	1.42223
8.39866	4.40531		7.90659	4.40531		5.92101	4.40531		8.39866	4.26228		7.90659	4.26228		5.92101	4.26228		8.39866	2.59932		7.90659	2.59932		5.92101	2.59932
4.26529	2.79285		3.12267	2.79285		6.66889	2.79285		4.26529	4.26454		3.12267	4.26454		6.66889	4.26454		4.26529	1.97085		3.12267	1.97085		6.66889	1.97085
1.73985	3.19377		0.782409	3.19377		0.495695	3.19377		1.73985	0.400538		0.782409	0.400538		0.495695	0.400538		1.73985	0.286881		0.782409	0.286881		0.495695	0.286881
8.58368	3.41954		7.14323	3.41954		6.21704	3.41954		8.58368	5.7126		7.14323	5.7126		6.21704	5.7126		8.58368	3.34767		7.14323	3.34767		6.21704	3.34767
8.35089	5.24146		3.84197	5.24146		5.35403	5.24146		8.35089	5.97842		3.84197	5.97842		5.35403	5.97842		8.35089	4.35966		3.84197	4.35966		5.35403	4.35966
4.54411	2.88166		5.96371	2.88166		5.11936	2.88166		4.54411	6.42744		5.96371	6.42744		5.11936	6.42744		4.54411	3.79701		5.96371	3.79701		5.11936	3.79701
1.94486	0.124328		0.15056	0.124328		1.57046	0.124328		1.94486	2.6017		0.15056	2.6017		1.57046	2.6017		1.94486	1.74846		0.15056	1.74846		1.57046	1.74846
0.485427	1.66448		0.226509	1.66448		0.163499	1.66448		0.485427	1.15704		0.226509	1.15704		0.163499	1.15704		0.485427	0.422233		0.226509	0.422233		0.163499	0.422233
2.80116	1.57531		1.31034	1.57531		3.01436	1.57531		2.80116	4.69989		1.31034	4.69989		3.01436	4.69989		2.80116	2.09761		1.31034	2.09761		3.01436	2.09761
7.64782	3.76553		7.2465	3.76553		4.88947	3.76553		7.64782	4.92742		7.2465	4.92742		4.88947	4.92742		7.64782	1.34483		7.2465	1.34483		4.88947	1.34483
2.37574	3.25248		0.163499	3.25248		3.5472	3.25248		2.37574	1.52607		0.163499	1.52607		3.5472	1.52607		2.37574	0.632268		0.163499	0.632268		3.5472	0.632268
2.69153	3.82273		0.411426	3.82273		3.12101	3.82273		2.69153	2.03562		0.411426	2.03562		3.12101	2.03562		2.69153	1.76128		0.411426	1.76128		3.12101	1.76128
6.86654	2.79701		4.16028	2.79701		6.31179	2.79701		6.86654	4.55582		4.16028	4.55582		6.31179	4.55582		6.86654	3.83592		4.16028	3.83592		6.31179	3.83592
2.70266	2.38405		0.15056	2.38405		4.62352	2.38405		2.70266	2.31904		0.15056	2.31904		4.62352	2.31904		2.70266	0.286881		0.15056	0.286881		4.62352	0.286881
6.67962	2.49569		3.38543	2.49569		4.13996	2.49569		6.67962	5.24489		3.38543	5.24489		4.13996	5.24489		6.67962	0.970854		3.38543	0.970854		4.13996	0.970854
10.0174	4.03474		5.98914	4.03474		6.72697	4.03474		10.0174	5.73091		5.98914	5.73091		6.72697	5.73091		10.0174	2.24184		5.98914	2.24184		6.72697	2.24184
4.69822	2.31615		4.12598	2.31615		5.3726	2.31615		4.69822	5.02237		4.12598	5.02237		5.3726	5.02237		4.69822	1.72683		4.12598	1.72683		5.3726	1.72683
5.95791	2.74846		4.20945	2.74846		5.28873	2.74846		5.95791	4.93593		4.20945	4.93593		5.28873	4.93593		5.95791	0.879706		4.20945	0.879706		5.28873	0.879706
1.33914	0.111031		0.263034	0.111031		2.94111	0.111031		1.33914	4.26754		0.263034	4.26754		2.94111	4.26754		1.33914	0.641546		0.263034	0.641546		2.94111	0.641546
5.7057	2.7866		6.54875	2.7866		4.08577	2.7866		5.7057	3.41684		6.54875	3.41684		4.08577	3.41684		5.7057	1.77821		6.54875	1.77821		4.08577	1.77821
4.13914	3.02148		4.25626	3.02148		3.2342	3.02148		4.13914	3.8339		4.25626	3.8339		3.2342	3.8339		4.13914	0.014355		4.25626	0.014355		3.2342	0.014355
3.8953	3.44228		4.62235	3.44228		5.68734	3.44228		3.8953	4.70266		4.62235	4.70266		5.68734	4.70266		3.8953	0.042644		4.62235	0.042644		5.68734	0.042644
7.65299	1.852		7.53535	1.852		5.70155	1.852		7.65299	5.67384		7.53535	5.67384		5.70155	5.67384		7.65299	0.070389		7.53535	0.070389		5.70155	0.070389
5.60021	4.63692		5.99616	4.63692		4.60229	4.63692		5.60021	3.52482		5.99616	3.52482		4.60229	3.52482		5.60021	3.2342		5.99616	3.2342		4.60229	3.2342
6.12267	3.26754		6.13484	3.26754		4.52732	3.26754		6.12267	3.9486		6.13484	3.9486		4.52732	3.9486		6.12267	2.8953		6.13484	2.8953		4.52732	2.8953
7.44543	3.64501		6.27426	3.64501		5.48414	3.64501		7.44543	4.02414		6.27426	4.02414		5.48414	4.02414		7.44543	1.25096		6.27426	1.25096		5.48414	1.25096
9.41196	2.96162		7.46475	2.96162		5.26379	2.96162		9.41196	5.71094		7.46475	5.71094		5.26379	5.71094		9.41196	2.05311		7.46475	2.05311		5.26379	2.05311
7.11977	4.86592		6.57319	4.86592		5.43596	4.86592		7.11977	6.0505		6.57319	6.0505		5.43596	6.0505		7.11977	4.95		6.57319	4.95		5.43596	4.95
4.53169	3.56682		2.80323	3.56682		4.67582	3.56682		4.53169	4.1035		2.80323	4.1035		4.67582	4.1035		4.53169	0.695994		2.80323	0.695994		4.67582	0.695994
8.07302	1.81147		0.189034	1.81147		7.5738	1.81147		8.07302	4.86888		0.189034	4.86888		7.5738	4.86888		8.07302	4.38612		0.189034	4.38612		7.5738	4.38612
5.15664	1.9782		0.214125	1.9782		5.29389	1.9782		5.15664	4.8334		0.214125	4.8334		5.29389	4.8334		5.15664	0.650765		0.214125	0.650765		5.29389	0.650765
1.94111	0.575312		0.014355	0.575312		2.14405	0.575312		1.94111	2.62059		0.014355	2.62059		2.14405	2.62059		1.94111	0.367371		0.014355	0.367371		2.14405	0.367371
1.09761	0.111031		1.63691	0.111031		0.176323	0.111031		1.09761	1.76977		1.63691	1.76977		0.176323	1.76977		1.09761	0.516015		1.63691	0.516015		0.176323	0.516015
6.26303	3.76022		7.18982	3.76022		4.68257	3.76022		6.26303	5.21956		7.18982	5.21956		4.68257	5.21956		6.26303	2.15056		7.18982	2.15056		4.68257	2.15056
7.90515	3.83794		6.59171	3.83794		5.40939	3.83794		7.90515	4.774		6.59171	4.774		5.40939	4.774		7.90515	0.475085		6.59171	0.475085		5.40939	0.475085
1.91457	0.214125		0	0.214125		3.07724	0.214125		1.91457	0.275007		0	0.275007		3.07724	0.275007		1.91457	0.83996		0	0.83996		3.07724	0.83996
1.75275	0.895303		0.028569	0.895303		2.94486	0.895303		1.75275	0.378512		0.028569	0.378512		2.94486	0.378512		1.75275	0.238787		0.028569	0.238787		2.94486	0.238787
6.01659	3.12433		5.84398	3.12433		0.757023	3.12433		6.01659	1.72683		5.84398	1.72683		0.757023	1.72683		6.01659	1.59932		5.84398	1.59932		0.757023	1.59932
4.74254	0.594549		0.782409	0.594549		6.77452	0.594549		4.74254	4.11686		0.782409	4.11686		6.77452	4.11686		4.74254	0.963474		0.782409	0.963474		6.77452	0.963474
6.0197	4.09508		5.38957	4.09508		5.30415	4.09508		6.0197	3.67243		5.38957	3.67243		5.30415	3.67243		6.0197	3.18587		5.38957	3.18587		5.30415	3.18587
5.35826	3.28836		3.53232	3.28836		4.12516	3.28836		5.35826	4.43095		3.53232	4.43095		4.12516	4.43095		5.35826	3.04789		3.53232	3.04789		4.12516	3.04789
3.38405	0.333424		3.6792	0.333424		4.5404	0.333424		3.38405	2.85997		3.6792	2.85997		4.5404	2.85997		3.38405	2.07724		3.6792	2.07724		4.5404	2.07724
5.78999	3.58616		4.94158	3.58616		5.06264	3.58616		5.78999	4.70487		4.94158	4.70487		5.06264	4.70487		5.78999	3.43962		4.94158	3.43962		5.06264	3.43962
8.6756	3.67356		5.78477	3.67356		6.1299	3.67356		8.6756	4.74846		5.78477	4.74846		6.1299	4.74846		8.6756	3.46467		5.78477	3.46467		6.1299	3.46467
5.44626	2.87774		2.27799	2.87774		5.45121	2.87774		5.44626	5.5659		2.27799	5.5659		5.45121	5.5659		5.44626	1.53605		2.27799	1.53605		5.45121	1.53605
1.90689	0.863938		0.782409	0.863938		0.097611	0.863938		1.90689	1.50589		0.782409	1.50589		0.097611	1.50589		1.90689	0.62293		0.782409	0.62293		0.097611	0.62293
5.9397	1.774		2.9542	1.774		6.0706	1.774		5.9397	5.98231		2.9542	5.98231		6.0706	5.98231		5.9397	0.948601		2.9542	0.948601		6.0706	0.948601
6.88813	3.30743		4.15947	3.30743		5.08916	3.30743		6.88813	4.13996		4.15947	4.13996		5.08916	4.13996		6.88813	4.17393		4.15947	4.17393		5.08916	4.17393
7.41312	3.18269		3.58737	3.18269		6.25493	3.18269		7.41312	5.61029		3.58737	5.61029		6.25493	5.61029		7.41312	5.05355		3.58737	5.05355		6.25493	5.05355
7.85811	2.09761		6.89857	2.09761		6.01881	2.09761		7.85811	5.42995		6.89857	5.42995		6.01881	5.42995		7.85811	3.78031		6.89857	3.78031		6.01881	3.78031
7.96087	4.77136		6.89785	4.77136		5.75782	4.77136		7.96087	5.57561		6.89785	5.57561		5.75782	5.57561		7.96087	3.57046		6.89785	3.57046		5.75782	3.57046
6.6872	2.87184		6.44062	2.87184		5.90183	2.87184		6.6872	7.39575		6.44062	7.39575		5.90183	7.39575		6.6872	3.91648		6.44062	3.91648		5.90183	3.91648
8.20594	3.31759		6.25795	3.31759		5.97016	3.31759		8.20594	4.35896		6.25795	4.35896		5.97016	4.35896		8.20594	3.99096		6.25795	3.99096		5.97016	3.99096
7.99373	2.45418		5.58075	2.45418		6.01859	2.45418		7.99373	6.59515		5.58075	6.59515		6.01859	6.59515		7.99373	3.11103		5.58075	3.11103		6.01859	3.11103
9.41062	4.37573		7.78267	4.37573		5.88411	4.37573		9.41062	6.14914		7.78267	6.14914		5.88411	6.14914		9.41062	3.09761		7.78267	3.09761		5.88411	3.09761
6.94977	2.45418		1.70487	2.45418		5.78188	2.45418		6.94977	3.77189		1.70487	3.77189		5.78188	3.77189		6.94977	3.42492		1.70487	3.42492		5.78188	3.42492
0.555816	2.26903		0	2.26903		2.69822	2.26903		0.555816	1.15704		0	1.15704		2.69822	1.15704		0.555816	0.056584		0	0.056584		2.69822	0.056584
0.678072	0.163499		0.124328	0.163499		0.214125	0.163499		0.678072	1.774		0.124328	1.774		0.214125	1.774		0.678072	1.35614		0.124328	1.35614		0.214125	1.35614
1.926	0.356144		0.070389	0.356144		0.695994	0.356144		1.926	3.36177		0.070389	3.36177		0.695994	3.36177		1.926	0.641546		0.070389	0.641546		0.695994	0.641546
9.1899	2.926		4.9458	2.926		6.4019	2.926		9.1899	4.07125		4.9458	4.07125		6.4019	4.07125		9.1899	0.070389		4.9458	0.070389		6.4019	0.070389
8.69366	5.34625		6.77228	5.34625		5.7658	5.34625		8.69366	6.88423		6.77228	6.88423		5.7658	6.88423		8.69366	0.411426		6.77228	0.411426		5.7658	0.411426
2.47508	3.33771		0.963474	3.33771		1.53605	3.33771		2.47508	0.782409		0.963474	0.782409		1.53605	0.782409		2.47508	0.632268		0.963474	0.632268		1.53605	0.632268
0.695994	1.35614		0.250962	1.35614		0.111031	1.35614		0.695994	1.16993		0.250962	1.16993		0.111031	1.16993		0.695994	0.238787		0.250962	0.238787		0.111031	0.238787
5.53636	2.49057		1.78241	2.49057		5.21994	2.49057		5.53636	6.78241		1.78241	6.78241		5.21994	6.78241		5.53636	1		1.78241	1		5.21994	1
5.30122	3.68145		1.56072	3.68145		3.96347	3.68145		5.30122	2.37295		1.56072	2.37295		3.96347	2.37295		5.30122	2.30743		1.56072	2.30743		3.96347	2.30743
9.94188	3.32481		6.96243	3.32481		6.88557	3.32481		9.94188	6.54024		6.96243	6.54024		6.88557	6.54024		9.94188	1.47508		6.96243	1.47508		6.88557	1.47508
8.72867	4.96717		6.30633	4.96717		7.26144	4.96717		8.72867	6.10643		6.30633	6.10643		7.26144	6.10643		8.72867	3.56925		6.30633	3.56925		7.26144	3.56925
8.39416	3.1375		7.0994	3.1375		6.44062	3.1375		8.39416	6.31958		7.0994	6.31958		6.44062	6.31958		8.39416	2.28983		7.0994	2.28983		6.44062	2.28983
5.24944	3.15704		4.0268	3.15704		3.72901	3.15704		5.24944	4.3799		4.0268	4.3799		3.72901	4.3799		5.24944	2.80116		4.0268	2.80116		3.72901	2.80116
0.739848	0.226509		0.201634	0.226509		3.85997	0.226509		0.739848	2.03914		0.201634	2.03914		3.85997	2.03914		0.739848	0.321928		0.201634	0.321928		3.85997	0.321928
4.44029	0.378512		0.056584	0.378512		3.97453	0.378512		4.44029	4.14812		0.056584	4.14812		3.97453	4.14812		4.44029	3.44361		0.056584	3.44361		3.97453	3.44361
4.69042	1.07039		0.83996	1.07039		5.95699	1.07039		4.69042	3.9542		0.83996	3.9542		5.95699	3.9542		4.69042	0.731183		0.83996	0.731183		5.95699	0.731183
9.88325	4.37643		7.9341	4.37643		7.03276	4.37643		9.88325	5.75275		7.9341	5.75275		7.03276	5.75275		9.88325	3.48414		7.9341	3.48414		7.03276	3.48414
9.10659	2.87971		5.4663	2.87971		5.7732	2.87971		9.10659	5.48575		5.4663	5.48575		5.7732	5.48575		9.10659	2.38957		5.4663	2.38957		5.7732	2.38957
1.8679	3.67243		0.970854	3.67243		2.28983	3.67243		1.8679	4.94813		0.970854	4.94813		2.28983	4.94813		1.8679	0.298658		0.970854	0.298658		2.28983	0.298658
6.96347	2.83794		3.56316	2.83794		4.09761	2.83794		6.96347	4.69933		3.56316	4.69933		4.09761	4.69933		6.96347	3.09085		3.56316	3.09085		4.09761	3.09085
6.22978	3.35614		3.38267	3.35614		4.72574	3.35614		6.22978	4.53045		3.38267	4.53045		4.72574	4.53045		6.22978	3.76235		3.38267	3.76235		4.72574	3.76235
7.12091	4.33056		7.47541	4.33056		4.95233	4.33056		7.12091	4.16189		7.47541	4.16189		4.95233	4.16189		7.12091	3.93357		7.47541	3.93357		4.95233	3.93357
6.39094	2.38957		0.918386	2.38957		6.67342	2.38957		6.39094	5.15178		0.918386	5.15178		6.67342	5.15178		6.39094	3.40735		0.918386	3.40735		6.67342	3.40735
7.6811	2.9542		6.0974	2.9542		4.51853	2.9542		7.6811	5.1127		6.0974	5.1127		4.51853	5.1127		7.6811	1.77821		6.0974	1.77821		4.51853	1.77821
5.91361	1.98185		2.9855	1.98185		5.37016	1.98185		5.91361	5.01168		2.9855	5.01168		5.37016	5.01168		5.91361	4.70376		2.9855	4.70376		5.37016	4.70376
8.16128	4.60881		6.75114	4.60881		5.87357	4.60881		8.16128	4.90833		6.75114	4.90833		5.87357	4.90833		8.16128	3.99096		6.75114	3.99096		5.87357	3.99096
5.23993	2.18269		4.08066	2.18269		4.55028	2.18269		5.23993	5.8525		4.08066	5.8525		4.55028	5.8525		5.23993	0.454176		4.08066	0.454176		4.55028	0.454176
0.918386	0.070389		0.31034	0.070389		3.07211	0.070389		0.918386	3.01792		0.31034	3.01792		3.07211	3.01792		0.918386	0.163499		0.31034	0.163499		3.07211	0.163499
4.34767	2.37574		4.04439	2.37574		4.52982	2.37574		4.34767	3.79597		4.04439	3.79597		4.52982	3.79597		4.34767	4.95373		4.04439	4.95373		4.52982	4.95373
9.53603	4.50271		7.36273	4.50271		6.51696	4.50271		9.53603	6.14873		7.36273	6.14873		6.51696	6.14873		9.53603	2.9241		7.36273	2.9241		6.51696	2.9241
0.263034	0.124328		2.64386	0.124328		0.097611	0.124328		0.263034	1.9222		2.64386	1.9222		0.097611	1.9222		0.263034	0.226509		2.64386	0.226509		0.097611	0.226509
0.464668	2.22342		0.137504	2.22342		0.214125	2.22342		0.464668	2.7115		0.137504	2.7115		0.214125	2.7115		0.464668	0.250962		0.137504	0.250962		0.214125	0.250962
2.64846	1.03562		6.13771	1.03562		3.2765	1.03562		2.64846	1.53107		6.13771	1.53107		3.2765	1.53107		2.64846	1.08406		6.13771	1.08406		3.2765	1.08406
0.454176	6.3336		0.238787	6.3336		0.097611	6.3336		0.454176	0.31034		0.238787	0.31034		0.097611	0.31034		0.454176	1.1177		0.238787	1.1177		0.097611	1.1177
5.84474	2.56316		1.81967	2.56316		4.46858	2.56316		5.84474	5.08321		1.81967	5.08321		4.46858	5.08321		5.84474	2.29572		1.81967	2.29572		4.46858	2.29572
4.97315	4.08746		3.16189	4.08746		4.69933	4.08746		4.97315	4.16912		3.16189	4.16912		4.69933	4.16912		4.97315	3.74739		3.16189	3.74739		4.69933	3.74739
7.15563	3.55213		4.46858	3.55213		5.615	3.55213		7.15563	6.67058		4.46858	6.67058		5.615	6.67058		7.15563	1.41684		4.46858	1.41684		5.615	1.41684
7.3361	3.61117		1.03562	3.61117		7.656	3.61117		7.3361	5.70487		1.03562	5.70487		7.656	5.70487		7.3361	4.51979		1.03562	4.51979		7.656	4.51979
9.26477	3.53978		7.44559	3.53978		5.77663	3.53978		9.26477	6.36142		7.44559	6.36142		5.77663	6.36142		9.26477	2.98002		7.44559	2.98002		5.77663	2.98002
9.14111	3.15381		5.61235	3.15381		7.0258	3.15381		9.14111	6.21004		5.61235	6.21004		7.0258	6.21004		9.14111	0.163499		5.61235	0.163499		7.0258	0.163499
7.62877	2.88753		7.15937	2.88753		4.36597	2.88753		7.62877	5.32661		7.15937	5.32661		4.36597	5.32661		7.62877	4.11437		7.15937	4.11437		4.36597	4.11437
9.20386	2.56316		1.48543	2.56316		6.68328	2.56316		9.20386	3.847		1.48543	3.847		6.68328	3.847		9.20386	1.25701		1.48543	1.25701		6.68328	1.25701
2.24184	3.50335		0.137504	3.50335		3.26604	3.50335		2.24184	1.78241		0.137504	1.78241		3.26604	1.78241		2.24184	1.15704		0.137504	1.15704		3.26604	1.15704
8.15901	3.65076		6.56453	3.65076		5.31361	3.65076		8.15901	4.46401		6.56453	4.46401		5.31361	4.46401		8.15901	3.16027		6.56453	3.16027		5.31361	3.16027
5.22265	2.67129		6.1641	2.67129		6.14995	2.67129		5.22265	3.1127		6.1641	3.1127		6.14995	3.1127		5.22265	1.7866		6.1641	1.7866		6.14995	1.7866
8.97805	4.04089		6.61206	4.04089		6.0197	4.04089		8.97805	5.42828		6.61206	5.42828		6.0197	5.42828		8.97805	3.35332		6.61206	3.35332		6.0197	3.35332
4.99231	3.59574		2.63459	3.59574		5.56894	3.59574		4.99231	6.63445		2.63459	6.63445		5.56894	6.63445		4.99231	1.37295		2.63459	1.37295		5.56894	1.37295
2.18903	3.90785		0.137504	3.90785		3.66903	3.90785		2.18903	0.545968		0.137504	0.545968		3.66903	0.545968		2.18903	0.641546		0.137504	0.641546		3.66903	0.641546
0.475085	0.9855		0.250962	0.9855		0.214125	0.9855		0.475085	2.37574		0.250962	2.37574		0.214125	2.37574		0.475085	0.432959		0.250962	0.432959		0.214125	0.432959
5.49506	0.056584		0.111031	0.056584		4.28762	0.056584		5.49506	4.2891		0.111031	4.2891		4.28762	4.2891		5.49506	0.782409		0.111031	0.782409		4.28762	0.782409
5.6453	2.49314		4.69544	2.49314		4.83794	2.49314		5.6453	3.61706		4.69544	3.61706		4.83794	3.61706		5.6453	0.176323		4.69544	0.176323		4.83794	0.176323
1.25096	0.137504		0.286881	0.137504		0.250962	0.137504		1.25096	0.933573		0.286881	0.933573		0.250962	0.933573		1.25096	0.85599		0.286881	0.85599		0.250962	0.85599
4.84046	1.81147		5.16671	1.81147		2.04264	1.81147		4.84046	2.96717		5.16671	2.96717		2.04264	2.96717		4.84046	2.25096		5.16671	2.25096		2.04264	2.25096
0.163499	1.51601		0.042644	1.51601		0.137504	1.51601		0.163499	0.687061		0.042644	0.687061		0.137504	0.687061		0.163499	0.250962		0.042644	0.250962		0.137504	0.250962
7.40922	3.28836		4.7126	3.28836		5.70708	3.28836		7.40922	7.23237		4.7126	7.23237		5.70708	7.23237		7.40922	1.56072		4.7126	1.56072		5.70708	1.56072
7.80361	3.73335		7.04308	3.73335		6.34323	3.73335		7.80361	6.67412		7.04308	6.67412		6.34323	6.67412		7.80361	5.0197		7.04308	5.0197		6.34323	5.0197
0.485427	0.286881		0.137504	0.286881		0.495695	0.286881		0.485427	2.0036		0.137504	2.0036		0.495695	2.0036		0.485427	0.632268		0.137504	0.632268		0.495695	0.632268
3.9982	4.61058		0.526069	4.61058		4.31397	4.61058		3.9982	2.5656		0.526069	2.5656		4.31397	2.5656		3.9982	2.58737		0.526069	2.58737		4.31397	2.58737
0.941106	0.111031		0.275007	0.111031		6.18269	0.111031		0.941106	1.31034		0.275007	1.31034		6.18269	1.31034		0.941106	0.641546		0.275007	0.641546		6.18269	0.641546
0.545968	2.48285		0.097611	2.48285		0.15056	2.48285		0.545968	5.72329		0.097611	5.72329		0.15056	5.72329		0.545968	0.641546		0.097611	0.641546		0.15056	0.641546
4.20711	4.72083		3.36317	4.72083		4.51602	4.72083		4.20711	5.08831		3.36317	5.08831		4.51602	5.08831		4.20711	4.51602		3.36317	4.51602		4.51602	4.51602
7.26566	3.08576		1.65077	3.08576		6.51665	3.08576		7.26566	4.95838		1.65077	4.95838		6.51665	4.95838		7.26566	4.07724		1.65077	4.07724		6.51665	4.07724
2.69153	2.14731		4.76341	2.14731		2.49057	2.14731		2.69153	4.06867		4.76341	4.06867		2.49057	4.06867		2.69153	1.28096		4.76341	1.28096		2.49057	1.28096
9.91278	5.38094		7.75882	5.38094		6.42089	5.38094		9.91278	7.20574		7.75882	7.20574		6.42089	7.20574		9.91278	3.64386		7.75882	3.64386		6.42089	3.64386
0.978196	0.097611		0.214125	0.097611		0.214125	0.097611		0.978196	0.659925		0.214125	0.659925		0.214125	0.659925		0.978196	0.097611		0.214125	0.097611		0.214125	0.097611
9.67576	5.13175		7.46	5.13175		6.88423	5.13175		9.67576	8.36089		7.46	8.36089		6.88423	8.36089		9.67576	4.43763		7.46	4.43763		6.88423	4.43763
0.713696	0.214125		0.201634	0.214125		1.09761	0.214125		0.713696	1.76554		0.201634	1.76554		1.09761	1.76554		0.713696	0.526069		0.201634	0.526069		1.09761	0.526069
8.72891	3.22805		6.45022	3.22805		5.26716	3.22805		8.72891	4.05745		6.45022	4.05745		5.26716	4.05745		8.72891	3.80116		6.45022	3.80116		5.26716	3.80116
9.41673	3.5741		7.24698	3.5741		6.78973	3.5741		9.41673	5.81121		7.24698	5.81121		6.78973	5.81121		9.41673	3.5472		7.24698	3.5472		6.78973	3.5472
6.94498	3.35473		7.51254	3.35473		5.34163	3.35473		6.94498	5.34802		7.51254	5.34802		5.34163	5.34802		6.94498	0.575312		7.51254	0.575312		5.34163	0.575312
5.69599	1.98914		6.48156	1.98914		5.13299	1.98914		5.69599	3.22805		6.48156	3.22805		5.13299	3.22805		5.69599	2.34767		6.48156	2.34767		5.13299	2.34767
6.3792	1.51601		4.765	1.51601		3.74416	1.51601		6.3792	3.17632		4.765	3.17632		3.74416	3.17632		6.3792	3.51475		4.765	3.51475		3.74416	3.51475
0.831877	0.31034		0.15056	0.31034		2.40327	0.31034		0.831877	3.54967		0.15056	3.54967		2.40327	3.54967		0.831877	0.823749		0.15056	0.823749		2.40327	0.823749
0.056584	2.59216		0.028569	2.59216		0.895303	2.59216		0.056584	1.39506		0.028569	1.39506		0.895303	1.39506		0.056584	0.823749		0.028569	0.823749		0.895303	0.823749
7.53652	3.57652		5.92125	3.57652		5.23993	3.57652		7.53652	5.54164		5.92125	5.54164		5.23993	5.54164		7.53652	2.53356		5.92125	2.53356		5.23993	2.53356
9.12086	4.31034		7.02547	4.31034		6.78947	4.31034		9.12086	5.94158		7.02547	5.94158		6.78947	5.94158		9.12086	4.48993		7.02547	4.48993		6.78947	4.48993
3.93168	3.1635		3.46467	3.1635		4.72846	3.1635		3.93168	4.89336		3.46467	4.89336		4.72846	4.89336		3.93168	4.03386		3.46467	4.03386		4.72846	4.03386
6.91516	3.42761		5.11853	3.42761		5.80736	3.42761		6.91516	4.853		5.11853	4.853		5.80736	4.853		6.91516	3.04089		5.11853	3.04089		5.80736	3.04089
3.2342	1.56072		0.847997	1.56072		2.70044	1.56072		3.2342	2.82985		0.847997	2.82985		2.70044	2.82985		3.2342	0.214125		0.847997	0.214125		2.70044	0.214125
2.73552	0.422233		0.250962	0.422233		2.20477	0.422233		2.73552	3.95606		0.250962	3.95606		2.20477	3.95606		2.73552	1.90689		0.250962	1.90689		2.20477	1.90689
0	1.36177		0.028569	1.36177		0	1.36177		0	0.070389		0.028569	0.070389		0	0.070389		0	0.367371		0.028569	0.367371		0	0.367371
9.28635	4.51979		7.44236	4.51979		6.4694	4.51979		9.28635	5.68089		7.44236	5.68089		6.4694	5.68089		9.28635	3.39094		7.44236	3.39094		6.4694	3.39094
6.23036	0.887525		3.21257	0.887525		4.62819	0.887525		6.23036	5.88313		3.21257	5.88313		4.62819	5.88313		6.23036	3.14568		3.21257	3.14568		4.62819	3.14568
8.7845	4.52105		8.05631	4.52105		6.78542	4.52105		8.7845	4.93357		8.05631	4.93357		6.78542	4.93357		8.7845	4.70874		8.05631	4.70874		6.78542	4.70874
1.95606	2.41414		0.992768	2.41414		0.918386	2.41414		1.95606	0.536053		0.992768	0.536053		0.918386	0.536053		1.95606	0.070389		0.992768	0.070389		0.918386	0.070389
0.014355	0		0.028569	0		0	0		0.014355	1.63691		0.028569	1.63691		0	1.63691		0.014355	0.137504		0.028569	0.137504		0	0.137504
2.21101	3.90689		2.33914	3.90689		3.01078	3.90689		2.21101	0.9855		2.33914	0.9855		3.01078	0.9855		2.21101	1.64155		2.33914	1.64155		3.01078	1.64155
6.58346	3.16511		0.941106	3.16511		5.57501	3.16511		6.58346	6.38128		0.941106	6.38128		5.57501	6.38128		6.58346	2.8679		0.941106	2.8679		5.57501	2.8679
1.1375	4.39849		0.084064	4.39849		0.722466	4.39849		1.1375	0.555816		0.084064	0.555816		0.722466	0.555816		1.1375	0.238787		0.084064	0.238787		0.722466	0.238787
6.71438	3.34483		5.87283	3.34483		6.82668	3.34483		6.71438	5.6153		5.87283	5.6153		6.82668	5.6153		6.71438	2.58014		5.87283	2.58014		6.82668	2.58014
1.31034	0.704872		0.189034	0.704872		2.35614	0.704872		1.31034	2.08746		0.189034	2.08746		2.35614	2.08746		1.31034	0.956057		0.189034	0.956057		2.35614	0.956057
0.807355	0.948601		0.238787	0.948601		1.48026	0.948601		0.807355	2.96901		0.238787	2.96901		1.48026	2.96901		0.807355	0.097611		0.238787	0.097611		1.48026	0.097611
4.28466	1.9222		0.713696	1.9222		5.62469	1.9222		4.28466	5.23688		0.713696	5.23688		5.62469	5.23688		4.28466	1.33914		0.713696	1.33914		5.62469	1.33914
7.04549	1.926		4.97315	1.926		4.34483	1.926		7.04549	4.43962		4.97315	4.43962		4.34483	4.43962		7.04549	0.941106		4.97315	0.941106		4.34483	0.941106
6.69195	1.54102		3.75489	1.54102		4.11353	1.54102		6.69195	6.09972		3.75489	6.09972		4.11353	6.09972		6.69195	0.594549		3.75489	0.594549		4.11353	0.594549
6.50399	1.66903		6.24489	1.66903		4.50016	1.66903		6.50399	5.60199		6.24489	5.60199		4.50016	5.60199		6.50399	2.38957		6.24489	2.38957		4.50016	2.38957
0.713696	0.189034		0.163499	0.189034		0.286881	0.189034		0.713696	1.50589		0.163499	1.50589		0.286881	1.50589		0.713696	0.918386		0.163499	0.918386		0.286881	0.918386
0.014355	1.68706		0	1.68706		0	1.68706		0.014355	0.201634		0	0.201634		0	0.201634		0.014355	0.097611		0	0.097611		0	0.097611
7.17493	0.925999		3.79909	0.925999		4.14893	0.925999		7.17493	5.09592		3.79909	5.09592		4.14893	5.09592		7.17493	4.76075		3.79909	4.76075		4.14893	4.76075
6.43912	2.42223		6.30159	2.42223		4.4489	2.42223		6.43912	4.75916		6.30159	4.75916		4.4489	4.75916		6.43912	1.79077		6.30159	1.79077		4.4489	1.79077
9.5955	5.24983		6.13627	5.24983		8.00944	5.24983		9.5955	7.20173		6.13627	7.20173		8.00944	7.20173		9.5955	4.29572		6.13627	4.29572		8.00944	4.29572
9.57162	4.75596		7.11249	4.75596		5.46597	4.75596		9.57162	5.42626		7.11249	5.42626		5.46597	5.42626		9.57162	1.29278		7.11249	1.29278		5.46597	1.29278
6.75382	2.02148		5.48704	2.02148		6.38353	2.02148		6.75382	7.27566		5.48704	7.27566		6.38353	7.27566		6.75382	2.75702		5.48704	2.75702		6.38353	2.75702
5.54782	4.24869		3.82782	4.24869		5.44923	4.24869		5.54782	6.03562		3.82782	6.03562		5.44923	6.03562		5.54782	5.12763		3.82782	5.12763		5.44923	5.12763
6.90881	3.89433		2.84599	3.89433		5.10224	3.89433		6.90881	5.8674		2.84599	5.8674		5.10224	5.8674		6.90881	1.39506		2.84599	1.39506		5.10224	1.39506
5.29903	2.42761		2.73335	2.42761		5.14934	2.42761		5.29903	4.25248		2.73335	4.25248		5.14934	4.25248		5.29903	4.24565		2.73335	4.24565		5.14934	4.24565
4.89433	3.0018		2.37851	3.0018		4.23036	3.0018		4.89433	4.28021		2.37851	4.28021		4.23036	4.28021		4.89433	1.12433		2.37851	1.12433		4.23036	1.12433
6.20477	3.55336		2.26903	3.55336		5.55336	3.55336		6.20477	3.31615		2.26903	3.31615		5.55336	3.31615		6.20477	1.02857		2.26903	1.02857		5.55336	1.02857
1.02148	2.49825		0.111031	2.49825		0.15056	2.49825		1.02148	0.505891		0.111031	0.505891		0.15056	0.505891		1.02148	0.887525		0.111031	0.887525		0.15056	0.887525
10.9667	3.44095		7.16128	3.44095		6.6522	3.44095		10.9667	4.56803		7.16128	4.56803		6.6522	4.56803		10.9667	3.37016		7.16128	3.37016		6.6522	3.37016
4.78921	4.41143		0.250962	4.41143		5.5043	4.41143		4.78921	5.02237		0.250962	5.02237		5.5043	5.02237		4.78921	2.75061		0.250962	2.75061		5.5043	2.75061
6.08343	2.1375		0.15056	2.1375		5.86567	2.1375		6.08343	4.82477		0.15056	4.82477		5.86567	4.82477		6.08343	2.32193		0.15056	2.32193		5.86567	2.32193
5.00585	4.41346		2.21723	4.41346		4.36247	4.41346		5.00585	3.34767		2.21723	3.34767		4.36247	3.34767		5.00585	2.59694		2.21723	2.59694		4.36247	2.59694
1.52105	0.042644		0.344828	0.042644		3.45943	0.042644		1.52105	2.93923		0.344828	2.93923		3.45943	2.93923		1.52105	1.7137		0.344828	1.7137		3.45943	1.7137
7.67398	5.07125		0.250962	5.07125		3.89045	5.07125		7.67398	5.34412		0.250962	5.34412		3.89045	5.34412		7.67398	2.75702		0.250962	2.75702		3.89045	2.75702
10.0091	4.77505		6.38267	4.77505		5.89239	4.77505		10.0091	5.58737		6.38267	5.58737		5.89239	5.58737		10.0091	3.18587		6.38267	3.18587		5.89239	3.18587
10.3727	3.49569		6.46418	3.49569		4.96116	3.49569		10.3727	5.53107		6.46418	5.53107		4.96116	5.53107		10.3727	2.18587		6.46418	2.18587		4.96116	2.18587
9.00366	4.72738		8.11936	4.72738		6.61603	4.72738		9.00366	7.0187		8.11936	7.0187		6.61603	7.0187		9.00366	3.55949		8.11936	3.55949		6.61603	3.55949
7.24213	3.60881		0.070389	3.60881		5.69683	3.60881		7.24213	5.6091		0.070389	5.6091		5.69683	5.6091		7.24213	5.41109		0.070389	5.41109		5.69683	5.41109
7.78986	3.20477		7.75495	3.20477		5.99163	3.20477		7.78986	5.74551		7.75495	5.74551		5.99163	5.74551		7.78986	3.35332		7.75495	3.35332		5.99163	3.35332
7.12143	3.74953		4.32553	3.74953		5.25096	3.74953		7.12143	5.77637		4.32553	5.77637		5.25096	5.77637		7.12143	2.11103		4.32553	2.11103		5.25096	2.11103
4.63575	3.38819		6.80038	3.38819		5.15137	3.38819		4.63575	5.04702		6.80038	5.04702		5.15137	5.04702		4.63575	1.64155		6.80038	1.64155		5.15137	1.64155
10.4916	3.93734		7.7707	3.93734		6.09677	3.93734		10.4916	5.4121		7.7707	5.4121		6.09677	5.4121		10.4916	3.95513		7.7707	3.95513		6.09677	3.95513
10.1134	4.87234		7.31406	4.87234		7.10842	4.87234		10.1134	5.0237		7.31406	5.0237		7.10842	5.0237		10.1134	4.79649		7.31406	4.79649		7.10842	4.79649
4.24108	3.17313		0.189034	3.17313		5.76315	3.17313		4.24108	5.27724		0.189034	5.27724		5.76315	5.27724		4.24108	1.9486		0.189034	1.9486		5.76315	1.9486
1.69599	0.201634		2.95606	0.201634		3.19692	0.201634		1.69599	4.34979		2.95606	4.34979		3.19692	4.34979		1.69599	0.475085		2.95606	0.475085		3.19692	0.475085
6.37051	2.79494		6.92422	2.79494		4.68538	2.79494		6.37051	3.67694		6.92422	3.67694		4.68538	3.67694		6.37051	0.389567		6.92422	0.389567		4.68538	0.389567
9.09853	3.20163		6.67158	3.20163		5.80555	3.20163		9.09853	6.80774		6.67158	6.80774		5.80555	6.80774		9.09853	4.34767		6.67158	4.34767		5.80555	4.34767
0.948601	2.49314		2.30451	2.49314		2.4489	2.49314		0.948601	0.970854		2.30451	0.970854		2.4489	0.970854		0.948601	2.16993		2.30451	2.16993		2.4489	2.16993
8.51798	3.33628		7.80381	3.33628		5.68145	3.33628		8.51798	6.51175		7.80381	6.51175		5.68145	6.51175		8.51798	2.18903		7.80381	2.18903		5.68145	2.18903
5.58857	3.69488		5.17752	3.69488		5.1918	3.69488		5.58857	4.64039		5.17752	4.64039		5.1918	4.64039		5.58857	0.389567		5.17752	0.389567		5.1918	0.389567
9.48228	3.93546		6.79155	3.93546		6.52748	3.93546		9.48228	4.29572		6.79155	4.29572		6.52748	4.29572		9.48228	3.80632		6.79155	3.80632		6.52748	3.80632
9.42459	3.89336		6.4192	3.89336		6.73525	3.89336		9.42459	5.61853		6.4192	5.61853		6.73525	5.61853		9.42459	1.73552		6.4192	1.73552		6.73525	1.73552
1.60407	0.321928		0.176323	0.321928		4.36036	0.321928		1.60407	1.0072		0.176323	1.0072		4.36036	1.0072		1.60407	0.214125		0.176323	0.214125		4.36036	0.214125
7.81928	3.13258		6.13299	3.13258		6.47881	3.13258		7.81928	5.48123		6.13299	5.48123		6.47881	5.48123		7.81928	1.81557		6.13299	1.81557		6.47881	1.81557
4.79701	3.5373		3.02148	3.5373		5.3837	3.5373		4.79701	5.46369		3.02148	5.46369		5.3837	5.46369		4.79701	1.87184		3.02148	1.87184		5.3837	1.87184
3.74524	2.26003		0.344828	2.26003		4.70929	2.26003		3.74524	3.24793		0.344828	3.24793		4.70929	3.24793		3.74524	4.69877		0.344828	4.69877		4.70929	4.69877
6.87885	1.3505		4.97223	1.3505		5.51979	1.3505		6.87885	4.65363		4.97223	4.65363		5.51979	4.65363		6.87885	1.54102		4.97223	1.54102		5.51979	1.54102
9.28556	4.14078		6.06242	4.14078		5.18666	4.14078		9.28556	4.03738		6.06242	4.03738		5.18666	4.03738		9.28556	3.24945		6.06242	3.24945		5.18666	3.24945
8.97485	3.11603		7.40224	3.11603		5.34056	3.11603		8.97485	5.08449		7.40224	5.08449		5.34056	5.08449		8.97485	2.60407		7.40224	2.60407		5.34056	2.60407
7.89075	2.9982		5.81634	2.9982		4.89869	2.9982		7.89075	3.58135		5.81634	3.58135		4.89869	3.58135		7.89075	2.76765		5.81634	2.76765		4.89869	2.76765
5.96278	1.34483		1.13093	1.34483		6.30615	1.34483		5.96278	4.78083		1.13093	4.78083		6.30615	4.78083		5.96278	4.96023		1.13093	4.96023		6.30615	4.96023
8.82559	3.81967		7.98487	3.81967		7.00865	3.81967		8.82559	5.34802		7.98487	5.34802		7.00865	5.34802		8.82559	3.01614		7.98487	3.01614		7.00865	3.01614
7.52873	3.39369		4.70598	3.39369		5.32876	3.39369		7.52873	5.38267		4.70598	5.38267		5.32876	5.38267		7.52873	4.42895		4.70598	4.42895		5.32876	4.42895
5.64818	1.54102		3.93357	1.54102		5.05528	1.54102		5.64818	2.9279		3.93357	2.9279		5.05528	2.9279		5.64818	3.91648		3.93357	3.91648		5.05528	3.91648
6.78594	2.51096		3.68594	2.51096		7.06738	2.51096		6.78594	5.71122		3.68594	5.71122		7.06738	5.71122		6.78594	5.2724		3.68594	5.2724		7.06738	5.2724
6.54936	2.51349		4.24565	2.51349		4.31832	2.51349		6.54936	5.12928		4.24565	5.12928		4.31832	5.12928		6.54936	0.014355		4.24565	0.014355		4.31832	0.014355
7.39017	4.12928		2.81352	4.12928		6.22824	4.12928		7.39017	5.64414		2.81352	5.64414		6.22824	5.64414		7.39017	3.93829		2.81352	3.93829		6.22824	3.93829
8.5203	5.23343		7.12267	5.23343		6.8198	5.23343		8.5203	7.50192		7.12267	7.50192		6.8198	7.50192		8.5203	2.7761		7.12267	2.7761		6.8198	2.7761
0.739848	0.389567		0.163499	0.389567		1.0072	0.389567		0.739848	1.64155		0.163499	1.64155		1.0072	1.64155		0.739848	0.356144		0.163499	0.356144		1.0072	0.356144
4.43962	2.41954		3.85997	2.41954		4.61412	2.41954		4.43962	4.53481		3.85997	4.53481		4.61412	4.53481		4.43962	3.76977		3.85997	3.76977		4.61412	3.76977
3.0018	2.10769		0.555816	2.10769		5.57107	2.10769		3.0018	5.10727		0.555816	5.10727		5.57107	5.10727		3.0018	2.29278		0.555816	2.29278		5.57107	2.29278
7.63365	2.67807		5.79312	2.67807		5.79883	2.67807		7.63365	4.6837		5.79312	4.6837		5.79883	4.6837		7.63365	2.1375		5.79312	2.1375		5.79883	2.1375
0.454176	0.042644		0.163499	0.042644		0.189034	0.042644		0.454176	0.85599		0.163499	0.85599		0.189034	0.85599		0.454176	0.722466		0.163499	0.722466		0.189034	0.722466
0.443607	2.17632		0.189034	2.17632		0.286881	2.17632		0.443607	0.15056		0.189034	0.15056		0.286881	0.15056		0.443607	0.963474		0.189034	0.963474		0.286881	0.963474
1.24489	0.042644		0.422233	0.042644		1.23879	0.042644		1.24489	0.594549		0.422233	0.594549		1.23879	0.594549		1.24489	0.321928		0.422233	0.321928		1.23879	0.321928
5.3572	3.88166		4.07553	3.88166		4.33414	3.88166		5.3572	5.93334		4.07553	5.93334		4.33414	5.93334		5.3572	1.0072		4.07553	1.0072		4.33414	1.0072
5.9535	4.93121		5.38128	4.93121		5.19298	4.93121		5.9535	5.99887		5.38128	5.99887		5.19298	5.99887		5.9535	2.19535		5.38128	2.19535		5.19298	2.19535
4.59753	3.45681		0.028569	3.45681		4.87725	3.45681		4.59753	3.852		0.028569	3.852		4.87725	3.852		4.59753	0.014355		0.028569	0.014355		4.87725	0.014355
8.92701	4.40463		7.79429	4.40463		6.70307	4.40463		8.92701	6.87406		7.79429	6.87406		6.70307	6.87406		8.92701	3.68145		7.79429	3.68145		6.70307	3.68145
0.713696	0.137504		0.201634	0.137504		0.201634	0.137504		0.713696	1.58976		0.201634	1.58976		0.201634	1.58976		0.713696	0.584963		0.201634	0.584963		0.201634	0.584963
8.84984	3.70819		6.95327	3.70819		7.12794	3.70819		8.84984	7.08799		6.95327	7.08799		7.12794	7.08799		8.84984	3.5373		6.95327	3.5373		7.12794	3.5373
0.722466	2.09424		0.201634	2.09424		1.8953	2.09424		0.722466	3.90111		0.201634	3.90111		1.8953	3.90111		0.722466	0.757023		0.201634	0.757023		1.8953	0.757023
7.84373	2.76553		4.16752	2.76553		6.30561	2.76553		7.84373	5.32625		4.16752	5.32625		6.30561	5.32625		7.84373	3.36036		4.16752	3.36036		6.30561	3.36036
6.44477	2.6893		6.40548	2.6893		6.41988	2.6893		6.44477	5.92244		6.40548	5.92244		6.41988	5.92244		6.44477	4.04789		6.40548	4.04789		6.41988	4.04789
9.37658	3.98459		7.49769	3.98459		5.49506	3.98459		9.37658	6.81237		7.49769	6.81237		5.49506	6.81237		9.37658	2.11103		7.49769	2.11103		5.49506	2.11103
4.5509	3.26903		6.45434	3.26903		4.47379	3.26903		4.5509	4.41616		6.45434	4.41616		4.47379	4.41616		4.5509	1.12433		6.45434	1.12433		4.47379	1.12433
2.40599	2.95233		2.07382	2.95233		3.40871	2.95233		2.40599	4.90545		2.07382	4.90545		3.40871	4.90545		2.40599	2.25701		2.07382	2.25701		3.40871	2.25701
4.8212	3.15056		2.30451	3.15056		5.72329	3.15056		4.8212	5.61765		2.30451	5.61765		5.72329	5.61765		4.8212	5.6311		2.30451	5.6311		5.72329	5.6311
5.94064	3.72901		5.75649	3.72901		5.28244	3.72901		5.94064	5.49249		5.75649	5.49249		5.28244	5.49249		5.94064	0.678072		5.75649	0.678072		5.28244	0.678072
3.51601	3.88264		4.8953	3.88264		4.0072	3.88264		3.51601	2.32193		4.8953	2.32193		4.0072	2.32193		3.51601	2.81762		4.8953	2.81762		4.0072	2.81762
1.97453	2.49569		0.505891	2.49569		4.66846	2.49569		1.97453	4.18507		0.505891	4.18507		4.66846	4.18507		1.97453	3.36457		0.505891	3.36457		4.66846	3.36457
3.89918	1.87184		0.887525	1.87184		3.19219	1.87184		3.89918	3.84499		0.887525	3.84499		3.19219	3.84499		3.89918	1.91839		0.887525	1.91839		3.19219	1.91839
7.85474	3.76765		6.10098	3.76765		5.94626	3.76765		7.85474	5.77347		6.10098	5.77347		5.94626	5.77347		7.85474	2.69377		6.10098	2.69377		5.94626	2.69377
2.62527	1		0.594549	1		2.90881	1		2.62527	4.45943		0.594549	4.45943		2.90881	4.45943		2.62527	0.887525		0.594549	0.887525		2.90881	0.887525
10.2009	5.12557		6.42206	5.12557		6.32643	5.12557		10.2009	3.06867		6.42206	3.06867		6.32643	3.06867		10.2009	3.49569		6.42206	3.49569		6.32643	3.49569
0.464668	1.78241		0.422233	1.78241		2.01436	1.78241		0.464668	0.464668		0.422233	0.464668		2.01436	0.464668		0.464668	2.53107		0.422233	2.53107		2.01436	2.53107
0.782409	1.54597		0.298658	1.54597		0.31034	1.54597		0.782409	2.31325		0.298658	2.31325		0.31034	2.31325		0.782409	0.485427		0.298658	0.485427		0.31034	0.485427
10.1551	5.01123		7.95443	5.01123		6.71246	5.01123		10.1551	7.07778		7.95443	7.07778		6.71246	7.07778		10.1551	4.05485		7.95443	4.05485		6.71246	4.05485
1.0635	0.214125		0.238787	0.214125		0.536053	0.214125		1.0635	2.58256		0.238787	2.58256		0.536053	2.58256		1.0635	0.275007		0.238787	0.275007		0.536053	0.275007
7.25955	3.10266		0.286881	3.10266		5.68622	3.10266		7.25955	5.50875		0.286881	5.50875		5.68622	5.50875		7.25955	2.14078		0.286881	2.14078		5.68622	2.14078
8.38746	2.82782		7.24802	2.82782		6.66732	2.82782		8.38746	6.29921		7.24802	6.29921		6.66732	6.29921		8.38746	4.04527		7.24802	4.04527		6.66732	4.04527
8.4683	2.80116		4.49249	2.80116		4.9607	2.80116		8.4683	5.36562		4.49249	5.36562		4.9607	5.36562		8.4683	3.15381		4.49249	3.15381		4.9607	3.15381
7.8358	4.22188		7.75722	4.22188		7.20897	4.22188		7.8358	6.67044		7.75722	6.67044		7.20897	6.67044		7.8358	3.78136		7.75722	3.78136		7.20897	3.78136
5.50016	4.13832		3.33056	4.13832		6.67751	4.13832		5.50016	7.84254		3.33056	7.84254		6.67751	7.84254		5.50016	3.64961		3.33056	3.64961		6.67751	3.64961
4.75702	3.43829		4.38819	3.43829		5.91409	3.43829		4.75702	5.47638		4.38819	5.47638		5.91409	5.47638		4.75702	2.41684		4.38819	2.41684		5.91409	2.41684
5.54875	4.23112		4.66448	4.23112		5.67158	4.23112		5.54875	2.774		4.66448	2.774		5.67158	2.774		5.54875	3.11603		4.66448	3.11603		5.67158	3.11603
10.6189	3.91361		8.95155	3.91361		5.7832	3.91361		10.6189	6.61809		8.95155	6.61809		5.7832	6.61809		10.6189	1.91073		8.95155	1.91073		5.7832	1.91073
8.0138	4.41616		6.67582	4.41616		5.60437	4.41616		8.0138	5.7252		6.67582	5.7252		5.60437	5.7252		8.0138	3.53605		6.67582	3.53605		5.60437	3.53605
2.17632	0.956057		1	0.956057		0.773996	0.956057		2.17632	1.04963		1	1.04963		0.773996	1.04963		2.17632	1.73118		1	1.73118		0.773996	1.73118
5.72874	3.06178		2.32769	3.06178		5.80038	3.06178		5.72874	6.22168		2.32769	6.22168		5.80038	6.22168		5.72874	1.90689		2.32769	1.90689		5.80038	1.90689
4.05137	3.7137		4.81301	3.7137		5.37539	3.7137		4.05137	4.854		4.81301	4.854		5.37539	4.854		4.05137	1.85599		4.81301	1.85599		5.37539	1.85599
8.36326	4.6792		7.91127	4.6792		5.852	4.6792		8.36326	4.91552		7.91127	4.91552		5.852	4.91552		8.36326	3.95047		7.91127	3.95047		5.852	3.95047
9.45088	4.17393		7.05961	4.17393		6.28059	4.17393		9.45088	6.45746		7.05961	6.45746		6.28059	6.45746		9.45088	0.163499		7.05961	0.163499		6.28059	0.163499
9.74853	5.27836		6.93652	5.27836		7.19889	5.27836		9.74853	6.66619		6.93652	6.66619		7.19889	6.66619		9.74853	4.2765		6.93652	4.2765		7.19889	4.2765
7.19957	3.51601		4.94345	3.51601		4.26754	3.51601		7.19957	5.59664		4.94345	5.59664		4.26754	5.59664		7.19957	0.214125		4.94345	0.214125		4.26754	0.214125
6.43229	3.89336		7.52003	3.89336		5.97039	3.89336		6.43229	6.06889		7.52003	6.06889		5.97039	6.06889		6.43229	2.80116		7.52003	2.80116		5.97039	2.80116
5.20789	3.56682		1.37295	3.56682		5.94439	3.56682		5.20789	5.03078		1.37295	5.03078		5.94439	5.03078		5.20789	3.26003		1.37295	3.26003		5.94439	3.26003
4.44228	3.1811		1.28096	3.1811		3.59335	3.1811		4.44228	6.34678		1.28096	6.34678		3.59335	6.34678		4.44228	2.66448		1.28096	2.66448		3.59335	2.66448
10.1302	3.46728		7.75649	3.46728		6.56636	3.46728		10.1302	6.80038		7.75649	6.80038		6.56636	6.80038		10.1302	2.84398		7.75649	2.84398		6.56636	2.84398
0.111031	0.321928		0.042644	0.321928		0.028569	0.321928		0.111031	2.45418		0.042644	2.45418		0.028569	2.45418		0.111031	0.298658		0.042644	0.298658		0.028569	0.298658
7.56811	4.17313		2.23879	4.17313		4.41075	4.17313		7.56811	5.43162		2.23879	5.43162		4.41075	5.43162		7.56811	0.250962		2.23879	0.250962		4.41075	0.250962
2.91073	4.19062		0.799087	4.19062		4.67356	4.19062		2.91073	1.93734		0.799087	1.93734		4.67356	1.93734		2.91073	1.11103		0.799087	1.11103		4.67356	1.11103
0.432959	0.31034		0	0.31034		0	0.31034		0.432959	1.43296		0	1.43296		0	1.43296		0.432959	0.056584		0	0.056584		0	0.056584
6.61058	2.93923		5.90183	2.93923		4.35896	2.93923		6.61058	4.78188		5.90183	4.78188		4.35896	4.78188		6.61058	0.678072		5.90183	0.678072		4.35896	0.678072
0.584963	4.64674		0.238787	4.64674		1.52105	4.64674		0.584963	2.68257		0.238787	2.68257		1.52105	2.68257		0.584963	0.713696		0.238787	0.713696		1.52105	0.713696
8.56491	4.98778		7.40199	4.98778		6.11478	4.98778		8.56491	4.57652		7.40199	4.57652		6.11478	4.57652		8.56491	4.37504		7.40199	4.37504		6.11478	4.37504
5.83036	3.06005		5.96832	3.06005		4.48929	3.06005		5.83036	4.03474		5.96832	4.03474		4.48929	4.03474		5.83036	2.86987		5.96832	2.86987		4.48929	2.86987
7.81256	3.24793		3.6893	3.24793		5.73931	3.24793		7.81256	5.70901		3.6893	5.70901		5.73931	5.70901		7.81256	2.62761		3.6893	2.62761		5.73931	2.62761
8.33177	4.49313		5.36947	4.49313		6.00248	4.49313		8.33177	4.92029		5.36947	4.92029		6.00248	4.92029		8.33177	3.6792		5.36947	3.6792		6.00248	3.6792
3.07724	1.55582		3.99277	1.55582		3.30305	1.55582		3.07724	3.71918		3.99277	3.71918		3.30305	3.71918		3.07724	1.01435		3.99277	1.01435		3.30305	1.01435
4.89142	2.24184		1.04963	2.24184		3.2765	2.24184		4.89142	4.19692		1.04963	4.19692		3.2765	4.19692		4.89142	4.67525		1.04963	4.67525		3.2765	4.67525
0.695994	0.757023		0.238787	0.757023		0.250962	0.757023		0.695994	0.378512		0.238787	0.378512		0.250962	0.378512		0.695994	0.475085		0.238787	0.475085		0.250962	0.475085
0.555816	0.189034		1.29866	0.189034		1	0.189034		0.555816	1.98914		1.29866	1.98914		1	1.98914		0.555816	0.070389		1.29866	0.070389		1	0.070389
4.84197	3.44095		1.83188	3.44095		3.6017	3.44095		4.84197	6.21548		1.83188	6.21548		3.6017	6.21548		4.84197	0.378512		1.83188	0.378512		3.6017	0.378512
5.29425	3.21568		1.1177	3.21568		4.02768	3.21568		5.29425	5.89385		1.1177	5.89385		4.02768	5.89385		5.29425	0.389567		1.1177	0.389567		4.02768	0.389567
0.879706	0.286881		0.250962	0.286881		0.097611	0.286881		0.879706	0.978196		0.250962	0.978196		0.097611	0.978196		0.879706	0.669027		0.250962	0.669027		0.097611	0.669027
6.24869	3.39917		4.15623	3.39917		5.01168	3.39917		6.24869	6.18725		4.15623	6.18725		5.01168	6.18725		6.24869	2.40054		4.15623	2.40054		5.01168	2.40054
9.28556	3.18903		6.6532	3.18903		7.09191	3.18903		9.28556	6.83529		6.6532	6.83529		7.09191	6.83529		9.28556	4.17792		6.6532	4.17792		7.09191	4.17792
1.34483	0.226509		0.214125	0.226509		0.831877	0.226509		1.34483	0.941106		0.214125	0.941106		0.831877	0.941106		1.34483	0.014355		0.214125	0.014355		0.831877	0.014355
2.40599	0.526069		0.286881	0.526069		2.44626	0.526069		2.40599	1.64155		0.286881	1.64155		2.44626	1.64155		2.40599	0.056584		0.286881	0.056584		2.44626	0.056584
3.99005	3.68594		0.85599	3.68594		4.21723	3.68594		3.99005	3.8953		0.85599	3.8953		4.21723	3.8953		3.99005	1.926		0.85599	1.926		4.21723	1.926
3.85599	3.46728		1.50589	3.46728		4.82375	3.46728		3.85599	5.71534		1.50589	5.71534		4.82375	5.71534		3.85599	3.08576		1.50589	3.08576		4.82375	3.08576
7.71445	3.5435		6.5741	3.5435		5.94252	3.5435		7.71445	6.46777		6.5741	6.46777		5.94252	6.46777		7.71445	3.05832		6.5741	3.05832		5.94252	3.05832
1.11103	0.555816		0.263034	0.555816		4.79077	0.555816		1.11103	4.22882		0.263034	4.22882		4.79077	4.22882		1.11103	1.80736		0.263034	1.80736		4.79077	1.80736
2.61589	0.275007		0.056584	0.275007		1.38957	0.275007		2.61589	3.56803		0.056584	3.56803		1.38957	3.56803		2.61589	0.903038		0.056584	0.903038		1.38957	0.903038
7.24451	2.56316		7.18229	2.56316		6.40156	2.56316		7.24451	3.8885		7.18229	3.8885		6.40156	3.8885		7.24451	4.03122		7.18229	4.03122		6.40156	4.03122
0.687061	3.53605		0.400538	3.53605		0.214125	3.53605		0.687061	1.95606		0.400538	1.95606		0.214125	1.95606		0.687061	0.400538		0.400538	0.400538		0.214125	0.400538
4.75221	3.42895		0.411426	3.42895		4.64846	3.42895		4.75221	4.57652		0.411426	4.57652		4.64846	4.57652		4.75221	0.970854		0.411426	0.970854		4.64846	0.970854
9.22805	4.36107		6.87024	4.36107		6.2867	4.36107		9.22805	6.03474		6.87024	6.03474		6.2867	6.03474		9.22805	2.55336		6.87024	2.55336		6.2867	2.55336
4.31976	2.82985		0.604071	2.82985		5.05918	2.82985		4.31976	4.87086		0.604071	4.87086		5.05918	4.87086		4.31976	4.09255		0.604071	4.09255		5.05918	4.09255
9.39917	4.04264		7.84887	4.04264		5.52325	4.04264		9.39917	5.79338		7.84887	5.79338		5.52325	5.79338		9.39917	4.16912		7.84887	4.16912		5.52325	4.16912
7.7847	3.53978		5.43962	3.53978		5.80478	3.53978		7.7847	6.86716		5.43962	6.86716		5.80478	6.86716		7.7847	2.14078		5.43962	2.14078		5.80478	2.14078
8.45816	3.22651		6.94322	3.22651		5.30852	3.22651		8.45816	4.79338		6.94322	4.79338		5.30852	4.79338		8.45816	3.7845		6.94322	3.7845		5.30852	3.7845
1.31615	0.378512		0.137504	0.378512		1.40599	0.378512		1.31615	3.70819		0.137504	3.70819		1.40599	3.70819		1.31615	0.454176		0.137504	0.454176		1.40599	0.454176
1.28096	0.536053		0.356144	0.536053		1.48026	0.536053		1.28096	2.71809		0.356144	2.71809		1.48026	2.71809		1.28096	0.226509		0.356144	0.226509		1.48026	0.226509
1.14405	1.28688		0.432959	1.28688		0.485427	1.28688		1.14405	2.85997		0.432959	2.85997		0.485427	2.85997		1.14405	0.659925		0.432959	0.659925		0.485427	0.659925
8.55443	2.57531		5.90352	2.57531		4.60881	2.57531		8.55443	4.73227		5.90352	4.73227		4.60881	4.73227		8.55443	2.62293		5.90352	2.62293		4.60881	2.62293
5.30889	0.669027		3.27352	0.669027		4.5509	0.669027		5.30889	1.18903		3.27352	1.18903		4.5509	1.18903		5.30889	1.1375		3.27352	1.1375		4.5509	1.1375
8.41003	2.18269		4.62469	2.18269		4.65764	2.18269		8.41003	2.72465		4.62469	2.72465		4.65764	2.72465		8.41003	3.10936		4.62469	3.10936		4.65764	3.10936
2.16671	3.0054		0.641546	3.0054		4.65993	3.0054		2.16671	5.72137		0.641546	5.72137		4.65993	5.72137		2.16671	1.88752		0.641546	1.88752		4.65993	1.88752
0	0.879706		0	0.879706		0.028569	0.879706		0	2.36737		0	2.36737		0.028569	2.36737		0	0.495695		0	0.495695		0.028569	0.495695
5.71946	1.9486		1.774	1.9486		5.55182	1.9486		5.71946	5.43162		1.774	5.43162		5.55182	5.43162		5.71946	0.454176		1.774	0.454176		5.55182	0.454176
3.87283	0.014355		0.014355	0.014355		3.59932	0.014355		3.87283	3.90785		0.014355	3.90785		3.59932	3.90785		3.87283	0.042644		0.014355	0.042644		3.59932	0.042644
3.87283	2.87774		0.286881	2.87774		4.95884	2.87774		3.87283	7.11624		0.286881	7.11624		4.95884	7.11624		3.87283	0.321928		0.286881	0.321928		4.95884	0.321928
8.82772	3.03562		6.94498	3.03562		7.33136	3.03562		8.82772	5.75355		6.94498	5.75355		7.33136	5.75355		8.82772	3.56925		6.94498	3.56925		7.33136	3.56925
2.50589	0.704872		1.18269	0.704872		1.848	0.704872		2.50589	3.15056		1.18269	3.15056		1.848	3.15056		2.50589	0.641546		1.18269	0.641546		1.848	0.641546
10.6431	4.12267		1.70044	4.12267		7.24489	4.12267		10.6431	5.40293		1.70044	5.40293		7.24489	5.40293		10.6431	3.10098		1.70044	3.10098		7.24489	3.10098
2.43296	2.58976		0.739848	2.58976		4.09677	2.58976		2.43296	4.84699		0.739848	4.84699		4.09677	4.84699		2.43296	0.201634		0.739848	0.201634		4.09677	0.201634
7.00596	4.81044		3.64616	4.81044		2.65764	4.81044		7.00596	5.71946		3.64616	5.71946		2.65764	5.71946		7.00596	3.80219		3.64616	3.80219		2.65764	3.80219
10.3663	4.28021		7.14068	4.28021		6.26735	4.28021		10.3663	6.35526		7.14068	6.35526		6.26735	6.35526		10.3663	2.44361		7.14068	2.44361		6.26735	2.44361
2.53605	0.443607		1.11103	0.443607		4.32841	0.443607		2.53605	4.77821		1.11103	4.77821		4.32841	4.77821		2.53605	0.475085		1.11103	0.475085		4.32841	0.475085
6.84449	4.04789		8.02702	4.04789		5.91791	4.04789		6.84449	6.32589		8.02702	6.32589		5.91791	6.32589		6.84449	0.111031		8.02702	0.111031		5.91791	0.111031
6.40463	2.96347		0.613532	2.96347		5.68706	2.96347		6.40463	5.74551		0.613532	5.74551		5.68706	5.74551		6.40463	0.485427		0.613532	0.485427		5.68706	0.485427
0.545968	3.24641		0.505891	3.24641		0.163499	3.24641		0.545968	0.516015		0.505891	0.516015		0.163499	0.516015		0.545968	0.555816		0.505891	0.555816		0.163499	0.555816
6.66931	3.13093		6.27929	3.13093		4.97774	3.13093		6.66931	4.76447		6.27929	4.76447		4.97774	4.76447		6.66931	3.01078		6.27929	3.01078		4.97774	3.01078
6.15299	3.31615		6.28762	3.31615		4.37226	3.31615		6.15299	5.1639		6.28762	5.1639		4.37226	5.1639		6.15299	1.77821		6.28762	1.77821		4.37226	1.77821
2	4.28318		2.50843	4.28318		2.91265	4.28318		2	1.93734		2.50843	1.93734		2.91265	1.93734		2	2.24793		2.50843	2.24793		2.91265	2.24793
6.67342	3.0036		5.39746	3.0036		4.54226	3.0036		6.67342	4.54411		5.39746	4.54411		4.54226	4.54411		6.67342	2.854		5.39746	2.854		4.54226	2.854
8.86922	2.29866		7.67264	2.29866		5.71232	2.29866		8.86922	5.53263		7.67264	5.53263		5.71232	5.53263		8.86922	3.49057		7.67264	3.49057		5.71232	3.49057
8.00949	5.23993		6.50303	5.23993		5.37226	5.23993		8.00949	5.31687		6.50303	5.31687		5.37226	5.31687		8.00949	2.80323		6.50303	2.80323		5.37226	2.80323
6.60896	2.27799		0.189034	2.27799		6.29223	2.27799		6.60896	3.75489		0.189034	3.75489		6.29223	3.75489		6.60896	0.594549		0.189034	0.594549		6.29223	0.594549
9.04762	4.82528		8.07895	4.82528		6.95117	4.82528		9.04762	6.41193		8.07895	6.41193		6.95117	6.41193		9.04762	4.66846		8.07895	4.66846		6.95117	4.66846
2.37851	4.45418		0.356144	4.45418		2.65992	4.45418		2.37851	3.09424		0.356144	3.09424		2.65992	3.09424		2.37851	0.925999		0.356144	0.925999		2.65992	0.925999
5.80038	3.94579		5.60792	3.94579		4.67469	3.94579		5.80038	3.54967		5.60792	3.54967		4.67469	3.54967		5.80038	2.23266		5.60792	2.23266		4.67469	2.23266
8.37426	1.60407		4.13258	1.60407		4.59216	1.60407		8.37426	3.19377		4.13258	3.19377		4.59216	3.19377		8.37426	2.45418		4.13258	2.45418		4.59216	2.45418
2.31615	2.41684		4.03738	2.41684		0.014355	2.41684		2.31615	1.60881		4.03738	1.60881		0.014355	1.60881		2.31615	0.238787		4.03738	0.238787		0.014355	0.238787
8.16194	2.45943		6.3505	2.45943		6.53294	2.45943		8.16194	5.43663		6.3505	5.43663		6.53294	5.43663		8.16194	3.23113		6.3505	3.23113		6.53294	3.23113
6.41397	4.35826		6.84674	4.35826		6.31306	4.35826		6.41397	5.34625		6.84674	5.34625		6.31306	5.34625		6.41397	0.765535		6.84674	0.765535		6.31306	0.765535
3.39506	2.14078		0.526069	2.14078		4.58737	2.14078		3.39506	3.51349		0.526069	3.51349		4.58737	3.51349		3.39506	2.84398		0.526069	2.84398		4.58737	2.84398
0.757023	1.40599		0.344828	1.40599		0.201634	1.40599		0.757023	2.64386		0.344828	2.64386		0.201634	2.64386		0.757023	0.226509		0.344828	0.226509		0.201634	0.226509
0.389567	3.42223		0.344828	3.42223		0.250962	3.42223		0.389567	3.35191		0.344828	3.35191		0.250962	3.35191		0.389567	0.475085		0.344828	0.475085		0.250962	0.475085
7.0054	4.8674		6.01502	4.8674		6.71081	4.8674		7.0054	5.26228		6.01502	5.26228		6.71081	5.26228		7.0054	4.79805		6.01502	4.79805		6.71081	4.79805
0.863938	0.594549		0.584963	0.594549		3.15543	0.594549		0.863938	4.43229		0.584963	4.43229		3.15543	4.43229		0.863938	0.678072		0.584963	0.678072		3.15543	0.678072
1.23879	0.070389		0.189034	0.070389		4.35262	0.070389		1.23879	1.04264		0.189034	1.04264		4.35262	1.04264		1.23879	0.526069		0.189034	0.526069		4.35262	0.526069
1.31615	2.38128		0.333424	2.38128		2.26604	2.38128		1.31615	4.54844		0.333424	4.54844		2.26604	4.54844		1.31615	3.55582		0.333424	3.55582		2.26604	3.55582
2.18269	1.7137		0.367371	1.7137		2.67807	1.7137		2.18269	4.1643		0.367371	4.1643		2.67807	4.1643		2.18269	0.214125		0.367371	0.214125		2.67807	0.214125
6.30086	2.49314		6.19121	2.49314		5.56955	2.49314		6.30086	4.02059		6.19121	4.02059		5.56955	4.02059		6.30086	3.19219		6.19121	3.19219		5.56955	3.19219
7.36641	3.65764		5.1981	3.65764		4.98459	3.65764		7.36641	6.49362		5.1981	6.49362		4.98459	6.49362		7.36641	1.98914		5.1981	1.98914		4.98459	1.98914
1.38405	0.773996		0.124328	0.773996		3.11603	0.773996		1.38405	5.42794		0.124328	5.42794		3.11603	5.42794		1.38405	0.356144		0.124328	0.356144		3.11603	0.356144
7.00169	2.9222		7.87012	2.9222		5.00764	2.9222		7.00169	4.70763		7.87012	4.70763		5.00764	4.70763		7.00169	3.488		7.87012	3.488		5.00764	3.488
9.89753	3.49569		6.56301	3.49569		6.39129	3.49569		9.89753	4.75435		6.56301	4.75435		6.39129	4.75435		9.89753	4.13668		6.56301	4.13668		6.39129	4.13668
9.39605	3.26003		6.85786	3.26003		4.24641	3.26003		9.39605	5.42928		6.85786	5.42928		4.24641	5.42928		9.39605	2.848		6.85786	2.848		4.24641	2.848
9.05626	5.13381		7.85412	5.13381		6.6893	5.13381		9.05626	5.17991		7.85412	5.17991		6.6893	5.17991		9.05626	4.51538		7.85412	4.51538		6.6893	4.51538
0.495695	0.226509		0.097611	0.226509		0.124328	0.226509		0.495695	2.33914		0.097611	2.33914		0.124328	2.33914		0.495695	0.678072		0.097611	0.678072		0.124328	0.678072
0.286881	0.028569		0.028569	0.028569		0	0.028569		0.286881	0.344828		0.028569	0.344828		0	0.344828		0.286881	0.176323		0.028569	0.176323		0	0.176323
9.02301	4.1102		7.48164	4.1102		6.53838	4.1102		9.02301	5.54071		7.48164	5.54071		6.53838	5.54071		9.02301	3.98368		7.48164	3.98368		6.53838	3.98368
6.99243	1.75702		1.53107	1.75702		6.0847	1.75702		6.99243	5.12887		1.53107	5.12887		6.0847	5.12887		6.99243	3.73335		1.53107	3.73335		6.0847	3.73335
8.6499	4.337		7.58984	4.337		5.50112	4.337		8.6499	7.2317		7.58984	7.2317		5.50112	7.2317		8.6499	0.124328		7.58984	0.124328		5.50112	0.124328
9.02813	3.58976		7.38569	3.58976		5.92291	3.58976		9.02813	6.7362		7.38569	6.7362		5.92291	6.7362		9.02813	3.11103		7.38569	3.11103		5.92291	3.11103
1.04264	1.68706		0.298658	1.68706		0.545968	1.68706		1.04264	0.536053		0.298658	0.536053		0.545968	0.536053		1.04264	0.189034		0.298658	0.189034		0.545968	0.189034
8.78869	3.41684		6.70542	3.41684		3.853	3.41684		8.78869	2.18903		6.70542	2.18903		3.853	2.18903		8.78869	2.03914		6.70542	2.03914		3.853	2.03914
3.94579	3.24641		0.042644	3.24641		4.58737	3.24641		3.94579	3.78555		0.042644	3.78555		4.58737	3.78555		3.94579	0.15056		0.042644	0.15056		4.58737	0.15056
0.879706	0.097611		0.516015	0.097611		0.201634	0.097611		0.879706	0.189034		0.516015	0.189034		0.201634	0.189034		0.879706	0.823749		0.516015	0.823749		0.201634	0.823749
1.852	2.67807		0.201634	2.67807		3.93168	2.67807		1.852	4.64846		0.201634	4.64846		3.93168	4.64846		1.852	3.9222		0.201634	3.9222		3.93168	3.9222
0.495695	1.62761		1.87578	1.62761		4.11686	1.62761		0.495695	4.54844		1.87578	4.54844		4.11686	4.54844		0.495695	0.948601		1.87578	0.948601		4.11686	0.948601
4.55152	1.02857		0.650765	1.02857		4.07895	1.02857		4.55152	2.72683		0.650765	2.72683		4.07895	2.72683		4.55152	1.0635		0.650765	1.0635		4.07895	1.0635
6.7075	3.98914		1.73552	3.98914		6.82286	3.98914		6.7075	4.87578		1.73552	4.87578		6.82286	4.87578		6.7075	1.91457		1.73552	1.91457		6.82286	1.91457
6.7807	3.76871		5.49217	3.76871		6.65864	3.76871		6.7807	5.73769		5.49217	5.73769		6.65864	5.73769		6.7807	4.16832		5.49217	4.16832		6.65864	4.16832
7.2604	4.77558		6.0751	4.77558		5.33735	4.77558		7.2604	4.96625		6.0751	4.96625		5.33735	4.96625		7.2604	2.13422		6.0751	2.13422		5.33735	2.13422
8.5016	3.98368		6.84662	3.98368		5.86987	3.98368		8.5016	6.0036		6.84662	6.0036		5.86987	6.0036		8.5016	4.29057		6.84662	4.29057		5.86987	4.29057
9.54233	3.41007		7.87682	3.41007		6.59515	3.41007		9.54233	5.25096		7.87682	5.25096		6.59515	5.25096		9.54233	4.0009		7.87682	4.0009		6.59515	4.0009
0.526069	0.070389		0.137504	0.070389		0.189034	0.070389		0.526069	0.632268		0.137504	0.632268		0.189034	0.632268		0.526069	0.632268		0.137504	0.632268		0.189034	0.632268
3.29425	1.70044		3.67129	1.70044		3.93734	1.70044		3.29425	4.64559		3.67129	4.64559		3.93734	4.64559		3.29425	4.46009		3.67129	4.46009		3.93734	4.46009
7.13566	3.08066		0.545968	3.08066		6.24869	3.08066		7.13566	4.848		0.545968	4.848		6.24869	4.848		7.13566	3.91073		0.545968	3.91073		6.24869	3.91073
8.41638	4.13668		7.74839	4.13668		5.75729	4.13668		8.41638	5.28983		7.74839	5.28983		5.75729	5.28983		8.41638	2.08746		7.74839	2.08746		5.75729	2.08746
6.09255	2.28392		4.73281	2.28392		6.42576	2.28392		6.09255	4.34412		4.73281	4.34412		6.42576	4.34412		6.09255	0.137504		4.73281	0.137504		6.42576	0.137504
0.731183	0.495695		0.695994	0.495695		0.226509	0.495695		0.731183	0.286881		0.695994	0.286881		0.226509	0.286881		0.731183	0.250962		0.695994	0.250962		0.226509	0.250962
1.69153	0.632268		0.201634	0.632268		4.7703	0.632268		1.69153	0.992768		0.201634	0.992768		4.7703	0.992768		1.69153	0.15056		0.201634	0.15056		4.7703	0.15056
8.02641	3.72901		6.07981	3.72901		5.52231	3.72901		8.02641	5.03562		6.07981	5.03562		5.52231	5.03562		8.02641	1.41684		6.07981	1.41684		5.52231	1.41684
9.28859	3.4489		8.26491	3.4489		6.64904	3.4489		9.28859	5.27202		8.26491	5.27202		6.64904	5.27202		9.28859	3.78973		8.26491	3.78973		6.64904	3.78973
8.52791	3.72901		6.78699	3.72901		6.05007	3.72901		8.52791	6.39421		6.78699	6.39421		6.05007	6.39421		8.52791	2.35332		6.78699	2.35332		6.05007	2.35332
4.53294	3.65535		4.89045	3.65535		2.38957	3.65535		4.53294	2.50335		4.89045	2.50335		2.38957	2.50335		4.53294	2.05311		4.89045	2.05311		2.38957	2.05311
6.98596	3.81865		4.9458	3.81865		6.99865	3.81865		6.98596	4.28021		4.9458	4.28021		6.99865	4.28021		6.98596	3.03562		4.9458	3.03562		6.99865	3.03562
0.604071	1.4489		0.275007	1.4489		0.286881	1.4489		0.604071	0.432959		0.275007	0.432959		0.286881	0.432959		0.604071	0.201634		0.275007	0.201634		0.286881	0.201634
8.69871	4.2211		7.62286	4.2211		6.24963	4.2211		8.69871	5.88947		7.62286	5.88947		6.24963	5.88947		8.69871	3.83491		7.62286	3.83491		6.24963	3.83491
6.32859	3.62761		2.74416	3.62761		6.30561	3.62761		6.32859	3.11103		2.74416	3.11103		6.30561	3.11103		6.32859	4.06091		2.74416	4.06091		6.30561	4.06091
7.97654	2.55827		4.06781	2.55827		5.34305	2.55827		7.97654	3.85599		4.06781	3.85599		5.34305	3.85599		7.97654	4.33628		4.06781	4.33628		5.34305	4.33628
8.84131	4.21878		7.48188	4.21878		6.70915	4.21878		8.84131	5.11478		7.48188	5.11478		6.70915	5.11478		8.84131	4.12846		7.48188	4.12846		6.70915	4.12846
6.40701	2.92029		6.43763	2.92029		5.07082	2.92029		6.40701	4.61235		6.43763	4.61235		5.07082	4.61235		6.40701	3.05658		6.43763	3.05658		5.07082	3.05658
5.3147	0.400538		4.80271	0.400538		3.7301	0.400538		5.3147	5.38094		4.80271	5.38094		3.7301	5.38094		5.3147	1.42761		4.80271	1.42761		3.7301	1.42761
9.20369	5.46467		6.36615	5.46467		5.47638	5.46467		9.20369	6.1807		6.36615	6.1807		5.47638	6.1807		9.20369	2.36457		6.36615	2.36457		5.47638	2.36457
9.59913	3.90785		7.13761	3.90785		6.21237	3.90785		9.59913	4.6837		7.13761	4.6837		6.21237	4.6837		9.59913	1.48543		7.13761	1.48543		6.21237	1.48543
7.53854	2.95047		6.87246	2.95047		5.71644	2.95047		7.53854	3.91073		6.87246	3.91073		5.71644	3.91073		7.53854	3.22651		6.87246	3.22651		5.71644	3.22651
2.33914	0.214125		0	0.214125		3.1127	0.214125		2.33914	3.54102		0	3.54102		3.1127	3.54102		2.33914	1.9222		0	1.9222		3.1127	1.9222
8.93021	3.80426		7.45574	3.80426		5.17832	3.80426		8.93021	5.73633		7.45574	5.73633		5.17832	5.73633		8.93021	4.0036		7.45574	4.0036		5.17832	4.0036
8.21291	3.08746		7.2902	3.08746		5.47768	3.08746		8.21291	5.63488		7.2902	5.63488		5.47768	5.63488		8.21291	3.36457		7.2902	3.36457		5.47768	3.36457
0.659925	0.070389		0.286881	0.070389		1.12433	0.070389		0.659925	1.5656		0.286881	1.5656		1.12433	1.5656		0.659925	1.1177		0.286881	1.1177		1.12433	1.1177
6.66534	3.42761		5.09592	3.42761		5.97568	3.42761		6.66534	5.1334		5.09592	5.1334		5.97568	5.1334		6.66534	4.32337		5.09592	4.32337		5.97568	4.32337
7.32301	3.63227		4.46074	3.63227		4.54288	3.63227		7.32301	3.24489		4.46074	3.24489		4.54288	3.24489		7.32301	0.31034		4.46074	0.31034		4.54288	0.31034
7.23026	2.96162		1.5008	2.96162		4.60585	2.96162		7.23026	4.81044		1.5008	4.81044		4.60585	4.81044		7.23026	0.863938		1.5008	0.863938		4.60585	0.863938
5.0917	2.96901		4.12433	2.96901		4.69488	2.96901		5.0917	4.95931		4.12433	4.95931		4.69488	4.95931		5.0917	0.056584		4.12433	0.056584		4.69488	0.056584
3.89142	3.60644		5.73742	3.60644		2.80735	3.60644		3.89142	2.53356		5.73742	2.53356		2.80735	2.53356		3.89142	1.61353		5.73742	1.61353		2.80735	1.61353
6.84461	2.30743		2.59455	2.30743		5.37191	2.30743		6.84461	5.01436		2.59455	5.01436		5.37191	5.01436		6.84461	1.79077		2.59455	1.79077		5.37191	1.79077
0.773996	0.9855		0.226509	0.9855		0.250962	0.9855		0.773996	0.238787		0.226509	0.238787		0.250962	0.238787		0.773996	0.799087		0.226509	0.799087		0.250962	0.799087
7.32238	3.36877		1.18269	3.36877		6.54797	3.36877		7.32238	4.83744		1.18269	4.83744		6.54797	4.83744		7.32238	3.17632		1.18269	3.17632		6.54797	3.17632
4.8885	1.69599		6.04067	1.69599		5.14486	1.69599		4.8885	3.66221		6.04067	3.66221		5.14486	3.66221		4.8885	1.02857		6.04067	1.02857		5.14486	1.02857
5.54288	3.90304		1.18903	3.90304		6.31288	3.90304		5.54288	4.63981		1.18903	4.63981		6.31288	4.63981		5.54288	0.918386		1.18903	0.918386		6.31288	0.918386
8.39887	3.49697		6.51932	3.49697		6.633	3.49697		8.39887	5.98368		6.51932	5.98368		6.633	5.98368		8.39887	3.30159		6.51932	3.30159		6.633	3.30159
5.45055	3.5656		3.31179	3.5656		5.07296	3.5656		5.45055	6.43646		3.31179	6.43646		5.07296	6.43646		5.45055	1.29866		3.31179	1.29866		5.07296	1.29866
3.95699	2.40599		0.214125	2.40599		4.68594	2.40599		3.95699	2.23573		0.214125	2.23573		4.68594	2.23573		3.95699	0.250962		0.214125	0.250962		4.68594	0.250962
7.39112	3.7761		7.633	3.7761		5.94228	3.7761		7.39112	5.7366		7.633	5.7366		5.94228	5.7366		7.39112	2.83592		7.633	2.83592		5.94228	2.83592
8.03804	4.14323		6.40701	4.14323		6.01659	4.14323		8.03804	5.46891		6.40701	5.46891		6.01659	5.46891		8.03804	1.56072		6.40701	1.56072		6.01659	1.56072
3.28392	3.47508		0.042644	3.47508		4.05398	3.47508		3.28392	3.08236		0.042644	3.08236		4.05398	3.08236		3.28392	3.23726		0.042644	3.23726		4.05398	3.23726
0	0.85599		0.028569	0.85599		0	0.85599		0	0.485427		0.028569	0.485427		0	0.485427		0	0.056584		0.028569	0.056584		0	0.056584
9.53718	2.59455		6.633	2.59455		6.95175	2.59455		9.53718	5.2709		6.633	5.2709		6.95175	5.2709		9.53718	2.64155		6.633	2.64155		6.95175	2.64155
7.75161	2.02857		6.25493	2.02857		5.46597	2.02857		7.75161	4.50208		6.25493	4.50208		5.46597	4.50208		7.75161	3.06523		6.25493	3.06523		5.46597	3.06523
7.43854	4.76447		1.28688	4.76447		8.77834	4.76447		7.43854	5.81532		1.28688	5.81532		8.77834	5.81532		7.43854	2.9279		1.28688	2.9279		8.77834	2.9279
8.22983	2.22342		4.52607	2.22342		7.56133	2.22342		8.22983	3.34199		4.52607	3.34199		7.56133	3.34199		8.22983	1.42761		4.52607	1.42761		7.56133	1.42761
2.03914	2.54844		0.189034	2.54844		0.748461	2.54844		2.03914	5.53854		0.189034	5.53854		0.748461	5.53854		2.03914	1.63227		0.189034	1.63227		0.748461	1.63227
2.27202	2.11437		0.970854	2.11437		2.17632	2.11437		2.27202	1.16993		0.970854	1.16993		2.17632	1.16993		2.27202	0.555816		0.970854	0.555816		2.17632	0.555816
4.90785	2.07724		1.74416	2.07724		5.0072	2.07724		4.90785	5.4019		1.74416	5.4019		5.0072	5.4019		4.90785	0.070389		1.74416	0.070389		5.0072	0.070389
0.83996	0.028569		0.250962	0.028569		0.176323	0.028569		0.83996	0.831877		0.250962	0.831877		0.176323	0.831877		0.83996	0.226509		0.250962	0.226509		0.176323	0.226509
6.50684	2.34199		2.09424	2.34199		6.08151	2.34199		6.50684	4.35755		2.09424	4.35755		6.08151	4.35755		6.50684	2.16993		2.09424	2.16993		6.08151	2.16993
0.941106	5.14037		0.464668	5.14037		0.238787	5.14037		0.941106	2.14078		0.464668	2.14078		0.238787	2.14078		0.941106	0.863938		0.464668	0.863938		0.238787	0.863938
2.58256	3.29131		1.64155	3.29131		4.98185	3.29131		2.58256	4.83643		1.64155	4.83643		4.98185	4.83643		2.58256	0.748461		1.64155	0.748461		4.98185	0.748461
1.85599	0.31034		0.163499	0.31034		3.62176	0.31034		1.85599	3.9542		0.163499	3.9542		3.62176	3.9542		1.85599	0.594549		0.163499	0.594549		3.62176	0.594549
10.1927	4.78921		7.04821	4.78921		5.92742	4.78921		10.1927	6.76766		7.04821	6.76766		5.92742	6.76766		10.1927	3.91934		7.04821	3.91934		5.92742	3.91934
7.78024	4.83137		3.6241	4.83137		5.43763	4.83137		7.78024	4.74201		3.6241	4.74201		5.43763	4.74201		7.78024	4.58616		3.6241	4.58616		5.43763	4.58616
1.90304	1.63227		1.0635	1.63227		0.895303	1.63227		1.90304	0.887525		1.0635	0.887525		0.895303	0.887525		1.90304	0.070389		1.0635	0.070389		0.895303	0.070389
4.60526	2.25399		0.565597	2.25399		5.37191	2.25399		4.60526	2.28096		0.565597	2.28096		5.37191	2.28096		4.60526	2.26604		0.565597	2.26604		5.37191	2.26604
8.0192	4.43095		1.95606	4.43095		6.05289	4.43095		8.0192	5.75221		1.95606	5.75221		6.05289	5.75221		8.0192	2.70266		1.95606	2.70266		6.05289	2.70266
8.07666	4.0018		4.37016	4.0018		7.09117	4.0018		8.07666	7.20721		4.37016	7.20721		7.09117	7.20721		8.07666	3.48671		4.37016	3.48671		7.09117	3.48671
3.91648	3.904		0.516015	3.904		2.80116	3.904		3.91648	2.17632		0.516015	2.17632		2.80116	2.17632		3.91648	0.443607		0.516015	0.443607		2.80116	0.443607
2.46728	2.29278		0.389567	2.29278		4.0054	2.29278		2.46728	5.05311		0.389567	5.05311		4.0054	5.05311		2.46728	0.286881		0.389567	0.286881		4.0054	0.286881
7.39438	3.40871		3.30159	3.40871		6.00787	3.40871		7.39438	4.98823		3.30159	4.98823		6.00787	4.98823		7.39438	2.28392		3.30159	2.28392		6.00787	2.28392
8.53041	4.3147		7.33101	4.3147		6.85835	4.3147		8.53041	5.28244		7.33101	5.28244		6.85835	5.28244		8.53041	4.9542		7.33101	4.9542		6.85835	4.9542
0	0		0.584963	0		0	0		0	0.782409		0.584963	0.782409		0	0.782409		0	0.124328		0.584963	0.124328		0	0.124328
8.89054	2.5435		8.28114	2.5435		5.75622	2.5435		8.89054	5.61677		8.28114	5.61677		5.75622	5.61677		8.89054	3.75275		8.28114	3.75275		5.75622	3.75275
0.669027	0.097611		0.250962	0.097611		0.137504	0.097611		0.669027	0.722466		0.250962	0.722466		0.137504	0.722466		0.669027	0.782409		0.250962	0.782409		0.137504	0.782409
3.99005	3.09424		4.3792	3.09424		1.5509	3.09424		3.99005	3.68818		4.3792	3.68818		1.5509	3.68818		3.99005	1.58496		4.3792	1.58496		1.5509	1.58496
2.80116	2.04963		0.411426	2.04963		5.79286	2.04963		2.80116	3.84298		0.411426	3.84298		5.79286	3.84298		2.80116	3.29278		0.411426	3.29278		5.79286	3.29278
1.33914	0.298658		0.400538	0.298658		3.28392	0.298658		1.33914	3.42895		0.400538	3.42895		3.28392	3.42895		1.33914	0.687061		0.400538	0.687061		3.28392	0.687061
5.24146	5.49793		3.60526	5.49793		6.4851	5.49793		5.24146	4.49953		3.60526	4.49953		6.4851	4.49953		5.24146	4.56316		3.60526	4.56316		6.4851	4.56316
6.79805	4.19928		4.4822	4.19928		6	4.19928		6.79805	5.84072		4.4822	5.84072		6	5.84072		6.79805	1.01435		4.4822	1.01435		6	1.01435
0.678072	0.028569		2.08406	0.028569		0.201634	0.028569		0.678072	0.992768		2.08406	0.992768		0.201634	0.992768		0.678072	0.097611		2.08406	0.097611		0.201634	0.097611
2.73335	0.871844		0.604071	0.871844		3.27202	0.871844		2.73335	4.6094		0.604071	4.6094		3.27202	4.6094		2.73335	0.85599		0.604071	0.85599		3.27202	0.85599
0.464668	1.08406		0.111031	1.08406		0.124328	1.08406		0.464668	1.17632		0.111031	1.17632		0.124328	1.17632		0.464668	0.275007		0.111031	0.275007		0.124328	0.275007
1.04963	3.26903		0.333424	3.26903		0.201634	3.26903		1.04963	0.137504		0.333424	0.137504		0.201634	0.137504		1.04963	0.485427		0.333424	0.485427		0.201634	0.485427
4.0635	2.02503		3.70598	2.02503		4.72083	2.02503		4.0635	3.58857		3.70598	3.58857		4.72083	3.58857		4.0635	1.68706		3.70598	1.68706		4.72083	1.68706
2.16993	0.042644		0.226509	0.042644		0.111031	0.042644		2.16993	2.5656		0.226509	2.5656		0.111031	2.5656		2.16993	0.263034		0.226509	0.263034		0.111031	0.263034
1.48026	2.18269		0.650765	2.18269		3.45812	2.18269		1.48026	4.65076		0.650765	4.65076		3.45812	4.65076		1.48026	0.464668		0.650765	0.464668		3.45812	0.464668
8.55562	4.85499		7.91755	4.85499		6.83958	4.85499		8.55562	3.72901		7.91755	3.72901		6.83958	3.72901		8.55562	4.17712		7.91755	4.17712		6.83958	4.17712
1.3505	0.263034		0.163499	0.263034		2.12433	0.263034		1.3505	2.50589		0.163499	2.50589		2.12433	2.50589		1.3505	0.298658		0.163499	0.298658		2.12433	0.298658
6.27053	3.55459		6.87098	3.55459		6.34412	3.55459		6.27053	5.24298		6.87098	5.24298		6.34412	5.24298		6.27053	1.38957		6.87098	1.38957		6.34412	1.38957
0	0		0.028569	0		0	0		0	0.903038		0.028569	0.903038		0	0.903038		0	0.389567		0.028569	0.389567		0	0.389567
7.25096	2.81557		6.55735	2.81557		4.95559	2.81557		7.25096	5.94509		6.55735	5.94509		4.95559	5.94509		7.25096	2.55827		6.55735	2.55827		4.95559	2.55827
6.62425	2.75275		5.39472	2.75275		5.04876	2.75275		6.62425	5.85		5.39472	5.85		5.04876	5.85		6.62425	2.22342		5.39472	2.22342		5.04876	2.22342
9.05241	4.15137		7.28337	4.15137		5.22419	4.15137		9.05241	5.75114		7.28337	5.75114		5.22419	5.75114		9.05241	3.29278		7.28337	3.29278		5.22419	3.29278
7.41861	3.11437		6.92837	3.11437		5.54751	3.11437		7.41861	5.9991		6.92837	5.9991		5.54751	5.9991		7.41861	0.641546		6.92837	0.641546		5.54751	0.641546
2.07382	0.464668		1.17632	0.464668		2.41414	0.464668		2.07382	3.70708		1.17632	3.70708		2.41414	3.70708		2.07382	2.33056		1.17632	2.33056		2.41414	2.33056
7.51846	2.82985		7.83851	2.82985		5.94977	2.82985		7.51846	4.93499		7.83851	4.93499		5.94977	4.93499		7.51846	3.52482		7.83851	3.52482		5.94977	3.52482
7.81871	3.1375		2.95233	3.1375		4.38681	3.1375		7.81871	2.91265		2.95233	2.91265		4.38681	2.91265		7.81871	1.40054		2.95233	1.40054		4.38681	1.40054
1.52105	0.263034		0.163499	0.263034		0.422233	0.263034		1.52105	1.17632		0.163499	1.17632		0.422233	1.17632		1.52105	0.933573		0.163499	0.933573		0.422233	0.933573
6.39197	2.62994		2.29866	2.62994		5.78999	2.62994		6.39197	4.337		2.29866	4.337		5.78999	4.337		6.39197	1.25096		2.29866	1.25096		5.78999	1.25096
8.12691	4.16028		6.27612	4.16028		5.64328	4.16028		8.12691	5.85947		6.27612	5.85947		5.64328	5.85947		8.12691	1.71809		6.27612	1.71809		5.64328	1.71809
6.25304	2.10434		4.68426	2.10434		5.72874	2.10434		6.25304	7.28633		4.68426	7.28633		5.72874	7.28633		6.25304	1.78241		4.68426	1.78241		5.72874	1.78241
0.773996	0.411426		0.201634	0.411426		0.238787	0.411426		0.773996	0.505891		0.201634	0.505891		0.238787	0.505891		0.773996	0.333424		0.201634	0.333424		0.238787	0.333424
6.33324	4.06953		0.575312	4.06953		7.67101	4.06953		6.33324	5.73335		0.575312	5.73335		7.67101	5.73335		6.33324	2.97453		0.575312	2.97453		7.67101	2.97453
0.536053	3.23266		0.389567	3.23266		0.250962	3.23266		0.536053	2.79077		0.389567	2.79077		0.250962	2.79077		0.536053	0.238787		0.389567	0.238787		0.250962	0.238787
4.75756	1.49057		3.0072	1.49057		4.71425	1.49057		4.75756	5.26566		3.0072	5.26566		4.71425	5.26566		4.75756	1.22651		3.0072	1.22651		4.71425	1.22651
7.97985	2.9855		6.5146	2.9855		6.25512	2.9855		7.97985	5.26866		6.5146	5.26866		6.25512	5.26866		7.97985	1.46989		6.5146	1.46989		6.25512	1.46989
7.83567	2.57046		5.82171	2.57046		5.28244	2.57046		7.83567	5.29939		5.82171	5.29939		5.28244	5.29939		7.83567	0.344828		5.82171	0.344828		5.28244	0.344828
0.454176	2.32193		0.111031	2.32193		0.15056	2.32193		0.454176	0.85599		0.111031	0.85599		0.15056	0.85599		0.454176	0.505891		0.111031	0.505891		0.15056	0.505891
7.95693	3.45154		6.67948	3.45154		6.83378	3.45154		7.95693	6.66832		6.67948	6.66832		6.83378	6.66832		7.95693	0.731183		6.67948	0.731183		6.83378	0.731183
5.39163	1.3505		0.555816	1.3505		4.73715	1.3505		5.39163	4.5741		0.555816	4.5741		4.73715	4.5741		5.39163	4.68482		0.555816	4.68482		4.73715	4.68482
4.32265	1.72247		2.8679	1.72247		4.92125	1.72247		4.32265	4.29719		2.8679	4.29719		4.92125	4.29719		4.32265	0.505891		2.8679	0.505891		4.92125	0.505891
4.75168	1.848		0.485427	1.848		5.64789	1.848		4.75168	4.54164		0.485427	4.54164		5.64789	4.54164		4.75168	1.98185		0.485427	1.98185		5.64789	1.98185
5.1534	2.4489		5.18388	2.4489		4.33271	2.4489		5.1534	6.74133		5.18388	6.74133		4.33271	6.74133		5.1534	4.37712		5.18388	4.37712		4.33271	4.37712
9.19397	3.90304		7.57894	3.90304		6.21568	3.90304		9.19397	4.75969		7.57894	4.75969		6.21568	4.75969		9.19397	3.91552		7.57894	3.91552		6.21568	3.91552
4.94392	1.30451		1.39506	1.30451		4.30889	1.30451		4.94392	6.02015		1.39506	6.02015		4.30889	6.02015		4.94392	4.68032		1.39506	4.68032		4.30889	4.68032
6.17632	3.11437		4.71094	3.11437		5.82018	3.11437		6.17632	6.84122		4.71094	6.84122		5.82018	6.84122		6.17632	2.81762		4.71094	2.81762		5.82018	2.81762
0.757023	1.43829		0.056584	1.43829		2.51349	1.43829		0.757023	3.61235		0.056584	3.61235		2.51349	3.61235		0.757023	0.214125		0.056584	0.214125		2.51349	0.214125
6.15623	2.89336		7.01647	2.89336		4.16269	2.89336		6.15623	5.01569		7.01647	5.01569		4.16269	5.01569		6.15623	0.575312		7.01647	0.575312		4.16269	0.575312
7.08746	3.60644		6.06415	3.60644		5.96324	3.60644		7.08746	6.59485		6.06415	6.59485		5.96324	6.59485		7.08746	2.16671		6.06415	2.16671		5.96324	2.16671
1.28096	3.2342		0.226509	3.2342		2.26003	3.2342		1.28096	1.19535		0.226509	1.19535		2.26003	1.19535		1.28096	1.0635		0.226509	1.0635		2.26003	1.0635
5.96	3.06178		6.25001	3.06178		5.6522	3.06178		5.96	3.61589		6.25001	3.61589		5.6522	3.61589		5.96	0.201634		6.25001	0.201634		5.6522	0.201634
4.6605	2.41684		0.042644	2.41684		4.82018	2.41684		4.6605	2.75916		0.042644	2.75916		4.82018	2.75916		4.6605	0.275007		0.042644	0.275007		4.82018	0.275007
1.08406	0.823749		0.575312	0.823749		0.31034	0.823749		1.08406	0.432959		0.575312	0.432959		0.31034	0.432959		1.08406	0.176323		0.575312	0.176323		0.31034	0.176323
6.04199	3.67356		4.89579	3.67356		6.88899	3.67356		6.04199	5.78477		4.89579	5.78477		6.88899	5.78477		6.04199	0.773996		4.89579	0.773996		6.88899	0.773996
7.20085	2.71809		5.34127	2.71809		6.3107	2.71809		7.20085	5.56499		5.34127	5.56499		6.3107	5.56499		7.20085	0.298658		5.34127	0.298658		6.3107	0.298658
8.16872	3.40735		7.01659	3.40735		5.30561	3.40735		8.16872	4.76341		7.01659	4.76341		5.30561	4.76341		8.16872	0.545968		7.01659	0.545968		5.30561	0.545968
3.15218	2.6017		0.555816	2.6017		2.8339	2.6017		3.15218	4.81044		0.555816	4.81044		2.8339	4.81044		3.15218	0.263034		0.555816	0.263034		2.8339	0.263034
0.823749	2.14731		0.903038	2.14731		0.807355	2.14731		0.823749	1.21412		0.903038	1.21412		0.807355	1.21412		0.823749	0.124328		0.903038	0.124328		0.807355	0.124328
6.31488	4.95327		3.75809	4.95327		4.64559	4.95327		6.31488	3.42358		3.75809	3.42358		4.64559	3.42358		6.31488	4.22651		3.75809	4.22651		4.64559	4.22651
6.78855	2.36457		5.69544	2.36457		4.26003	2.36457		6.78855	5.14568		5.69544	5.14568		4.26003	5.14568		6.78855	0.189034		5.69544	0.189034		4.26003	0.189034
1.07724	0.111031		0.594549	0.111031		4.69377	0.111031		1.07724	1.43829		0.594549	1.43829		4.69377	1.43829		1.07724	0.765535		0.594549	0.765535		4.69377	0.765535
8.09133	3.34199		7.1643	3.34199		5.86518	3.34199		8.09133	4.06178		7.1643	4.06178		5.86518	4.06178		8.09133	3.43162		7.1643	3.43162		5.86518	3.43162
8.12872	3.74093		5.66363	3.74093		5.57954	3.74093		8.12872	3.54597		5.66363	3.54597		5.57954	3.54597		8.12872	2.47768		5.66363	2.47768		5.57954	2.47768
4.19456	3.62761		1.94486	3.62761		3.68032	3.62761		4.19456	2.29278		1.94486	2.29278		3.68032	2.29278		4.19456	1.07724		1.94486	1.07724		3.68032	1.07724
0.925999	1.04963		0.042644	1.04963		3.43029	1.04963		0.925999	4.89142		0.042644	4.89142		3.43029	4.89142		0.925999	0.356144		0.042644	0.356144		3.43029	0.356144
0.782409	0.321928		0.214125	0.321928		0.650765	0.321928		0.782409	0.831877		0.214125	0.831877		0.650765	0.831877		0.782409	0.226509		0.214125	0.226509		0.650765	0.226509
2.22342	2.72683		1.76554	2.72683		3.53107	2.72683		2.22342	1.15056		1.76554	1.15056		3.53107	1.15056		2.22342	1.13093		1.76554	1.13093		3.53107	1.13093
8.53664	2.16993		7.52482	2.16993		5.05268	2.16993		8.53664	5.16912		7.52482	5.16912		5.05268	5.16912		8.53664	3.24945		7.52482	3.24945		5.05268	3.24945
8.88743	2.9222		6.35014	2.9222		5.90448	2.9222		8.88743	4.81609		6.35014	4.81609		5.90448	4.81609		8.88743	2.85		6.35014	2.85		5.90448	2.85
2.49057	1.57531		0.344828	1.57531		2.90689	1.57531		2.49057	3.53232		0.344828	3.53232		2.90689	3.53232		2.49057	1.73118		0.344828	1.73118		2.90689	1.73118
9.73701	3.98002		6.54751	3.98002		6.67624	3.98002		9.73701	5.23573		6.54751	5.23573		6.67624	5.23573		9.73701	3.75168		6.54751	3.75168		6.67624	3.75168
0.748461	2.54597		3.67694	2.54597		4.80323	2.54597		0.748461	3.48929		3.67694	3.48929		4.80323	3.48929		0.748461	4.48736		3.67694	4.48736		4.80323	4.48736
2.8953	1.65993		0.526069	1.65993		3.79597	1.65993		2.8953	5.13134		0.526069	5.13134		3.79597	5.13134		2.8953	0.594549		0.526069	0.594549		3.79597	0.594549
7.39275	4.45746		6.1643	4.45746		5.47994	4.45746		7.39275	4.51791		6.1643	4.51791		5.47994	4.51791		7.39275	3.73444		6.1643	3.73444		5.47994	3.73444
8.95038	0.941106		8.26959	0.941106		5.64068	0.941106		8.95038	4.4019		8.26959	4.4019		5.64068	4.4019		8.95038	3.56316		8.26959	3.56316		5.64068	3.56316
8.17632	3.80529		6.22168	3.80529		5.83719	3.80529		8.17632	6.34341		6.22168	6.34341		5.83719	6.34341		8.17632	1.95606		6.22168	1.95606		5.83719	1.95606
2.82375	2.69822		0.748461	2.69822		2.90304	2.69822		2.82375	5.08364		0.748461	5.08364		2.90304	5.08364		2.82375	1.85997		0.748461	1.85997		2.90304	1.85997
8.20843	2.84398		7.57901	2.84398		5.0691	2.84398		8.20843	4.89869		7.57901	4.89869		5.0691	4.89869		8.20843	3.58496		7.57901	3.58496		5.0691	3.58496
6.00675	4.05918		5.47508	4.05918		4.51538	4.05918		6.00675	2.9782		5.47508	2.9782		4.51538	2.9782		6.00675	3.32337		5.47508	3.32337		4.51538	3.32337
2.98732	0.344828		0.014355	0.344828		1.9486	0.344828		2.98732	3.02325		0.014355	3.02325		1.9486	3.02325		2.98732	0.575312		0.014355	0.575312		1.9486	0.575312
3.01792	0.83996		2.13093	0.83996		2.05658	0.83996		3.01792	3.89045		2.13093	3.89045		2.05658	3.89045		3.01792	0.333424		2.13093	0.333424		2.05658	0.333424
8.15967	3.30012		7.5988	3.30012		5.56072	3.30012		8.15967	5.04177		7.5988	5.04177		5.56072	5.04177		8.15967	1.87184		7.5988	1.87184		5.56072	1.87184
4.765	4.37016		0.070389	4.37016		4.65019	4.37016		4.765	4.749		0.070389	4.749		4.65019	4.749		4.765	3.84298		0.070389	3.84298		4.65019	3.84298
5.49793	3.10936		0.85599	3.10936		5.86047	3.10936		5.49793	4.8679		0.85599	4.8679		5.86047	4.8679		5.49793	4.32121		0.85599	4.32121		5.86047	4.32121
8.52931	4.40803		7.43671	4.40803		6.19987	4.40803		8.52931	6.26866		7.43671	6.26866		6.19987	6.26866		8.52931	4.42559		7.43671	4.42559		6.19987	4.42559
5.37504	1.5509		4.74254	1.5509		5.99752	1.5509		5.37504	4.44162		4.74254	4.44162		5.99752	4.44162		5.37504	3.33199		4.74254	3.33199		5.99752	3.33199
0.124328	0.124328		1.45943	0.124328		0	0.124328		0.124328	0.367371		1.45943	0.367371		0	0.367371		0.124328	0.042644		1.45943	0.042644		0	0.042644
4.76341	1.79909		0.963474	1.79909		3.96901	1.79909		4.76341	3.39369		0.963474	3.39369		3.96901	3.39369		4.76341	3.35614		0.963474	3.35614		3.96901	3.35614
7.19554	3.9364		0.678072	3.9364		6.3067	3.9364		7.19554	5.60288		0.678072	5.60288		6.3067	5.60288		7.19554	4.23955		0.678072	4.23955		6.3067	4.23955
2.87774	0.505891		0.298658	0.505891		2.0635	0.505891		2.87774	4.22651		0.298658	4.22651		2.0635	4.22651		2.87774	0.226509		0.298658	0.226509		2.0635	0.226509
8.01285	3.79909		2.98732	3.79909		5.73281	3.79909		8.01285	5.36352		2.98732	5.36352		5.73281	5.36352		8.01285	4.13914		2.98732	4.13914		5.73281	4.13914
1.18269	0.056584		0	0.056584		4.04876	0.056584		1.18269	2.12763		0	2.12763		4.04876	2.12763		1.18269	0.933573		0	0.933573		4.04876	0.933573
1.58496	0.475085		0.286881	0.475085		3.60644	0.475085		1.58496	1.37295		0.286881	1.37295		3.60644	1.37295		1.58496	0.687061		0.286881	0.687061		3.60644	0.687061
6.27538	3.69822		0.378512	3.69822		4.851	3.69822		6.27538	2.20789		0.378512	2.20789		4.851	2.20789		6.27538	3.60288		0.378512	3.60288		4.851	3.60288
6.01078	2.83188		1.77821	2.83188		2.77821	2.83188		6.01078	3.11437		1.77821	3.11437		2.77821	3.11437		6.01078	3.51853		1.77821	3.51853		2.77821	3.51853
1.23879	0.526069		0.238787	0.526069		0.367371	0.526069		1.23879	0.925999		0.238787	0.925999		0.367371	0.925999		1.23879	0.584963		0.238787	0.584963		0.367371	0.584963
9.239	4.70044		7.11353	4.70044		5.42828	4.70044		9.239	6.26697		7.11353	6.26697		5.42828	6.26697		9.239	2.8339		7.11353	2.8339		5.42828	2.8339
7.2724	2.65306		4.65764	2.65306		3.57773	2.65306		7.2724	3.64155		4.65764	3.64155		3.57773	3.64155		7.2724	0.333424		4.65764	0.333424		3.57773	0.333424
4.46532	1.33342		5.05615	1.33342		5.1206	1.33342		4.46532	4.64212		5.05615	4.64212		5.1206	4.64212		4.46532	1.13093		5.05615	1.13093		5.1206	1.13093
0.83996	0.097611		0.238787	0.097611		0.226509	0.097611		0.83996	2.24793		0.238787	2.24793		0.226509	2.24793		0.83996	0.263034		0.238787	0.263034		0.226509	0.263034
7.37964	4.68032		2.47508	4.68032		6.17393	4.68032		7.37964	6.29921		2.47508	6.29921		6.17393	6.29921		7.37964	1.42761		2.47508	1.42761		6.17393	1.42761
4.23573	1.83996		0.321928	1.83996		5.01881	1.83996		4.23573	4.63865		0.321928	4.63865		5.01881	4.63865		4.23573	0.226509		0.321928	0.226509		5.01881	0.226509
6.48107	2.05311		6.59708	2.05311		4.97039	2.05311		6.48107	3.44228		6.59708	3.44228		4.97039	3.44228		6.48107	3.38405		6.59708	3.38405		4.97039	3.38405
7.1811	1.79494		5.29646	1.79494		2.73552	1.79494		7.1811	4.13668		5.29646	4.13668		2.73552	4.13668		7.1811	2.48027		5.29646	2.48027		2.73552	2.48027
8.11567	4.15866		6.7765	4.15866		7.98658	4.15866		8.11567	5.57773		6.7765	5.57773		7.98658	5.57773		8.11567	2.53356		6.7765	2.53356		7.98658	2.53356
8.72103	3.29866		8.31832	3.29866		6.52857	3.29866		8.72103	5.32769		8.31832	5.32769		6.52857	5.32769		8.72103	3.64846		8.31832	3.64846		6.52857	3.64846
1.16993	0.15056		0.275007	0.15056		0.722466	0.15056		1.16993	1.45943		0.275007	1.45943		0.722466	1.45943		1.16993	0.31034		0.275007	0.31034		0.722466	0.31034
6.83668	2.44095		5.51254	2.44095		5.11353	2.44095		6.83668	4.30086		5.51254	4.30086		5.11353	4.30086		6.83668	0.250962		5.51254	0.250962		5.11353	0.250962
8.13991	4.61589		7.01681	4.61589		5.12846	4.61589		8.13991	5.96878		7.01681	5.96878		5.12846	5.96878		8.13991	2.17951		7.01681	2.17951		5.12846	2.17951
5.1534	1.83996		3.33485	1.83996		5.51286	1.83996		5.1534	5.99367		3.33485	5.99367		5.51286	5.99367		5.1534	2.6893		3.33485	2.6893		5.51286	2.6893
10.0315	3.83996		7.84342	3.83996		7.06555	3.83996		10.0315	4.69209		7.84342	4.69209		7.06555	4.69209		10.0315	1.31034		7.84342	1.31034		7.06555	1.31034
6.99413	4.36457		5.58586	4.36457		5.0955	4.36457		6.99413	3.82171		5.58586	3.82171		5.0955	3.82171		6.99413	2.72247		5.58586	2.72247		5.0955	2.72247
0.275007	2.58496		0.056584	2.58496		0.097611	2.58496		0.275007	0.189034		0.056584	0.189034		0.097611	0.189034		0.275007	0.189034		0.056584	0.189034		0.097611	0.189034
7.69891	3.93923		4.73552	3.93923		5.70598	3.93923		7.69891	5.7271		4.73552	5.7271		5.70598	5.7271		7.69891	0.422233		4.73552	0.422233		5.70598	0.422233
1.05658	0.400538		0.400538	0.400538		0.505891	0.400538		1.05658	0.863938		0.400538	0.863938		0.505891	0.863938		1.05658	0.757023		0.400538	0.757023		0.505891	0.757023
2.90111	2.17632		0.933573	2.17632		4.28021	2.17632		2.90111	3.55336		0.933573	3.55336		4.28021	3.55336		2.90111	3.52732		0.933573	3.52732		4.28021	3.52732
0.137504	1.65535		0.028569	1.65535		0.056584	1.65535		0.137504	1.20789		0.028569	1.20789		0.056584	1.20789		0.137504	0.163499		0.028569	0.163499		0.056584	0.163499
0.879706	0.042644		3.62059	0.042644		0.189034	0.042644		0.879706	2.42492		3.62059	2.42492		0.189034	2.42492		0.879706	0.286881		3.62059	0.286881		0.189034	0.286881
1.41684	0.333424		0.687061	0.333424		0.516015	0.333424		1.41684	1.93357		0.687061	1.93357		0.516015	1.93357		1.41684	0.584963		0.687061	0.584963		0.516015	0.584963
9.19054	5.02945		6.21665	5.02945		6.12101	5.02945		9.19054	5.43496		6.21665	5.43496		6.12101	5.43496		9.19054	3.25248		6.21665	3.25248		6.12101	3.25248
6.78738	1.60881		0.176323	1.60881		4.30086	1.60881		6.78738	4.03914		0.176323	4.03914		4.30086	4.03914		6.78738	3.10936		0.176323	3.10936		4.30086	3.10936
1.0072	2.10434		0.286881	2.10434		0.238787	2.10434		1.0072	1.56072		0.286881	1.56072		0.238787	1.56072		1.0072	0.516015		0.286881	0.516015		0.238787	0.516015
6.21801	1.54102		1.94111	1.54102		4.53481	1.54102		6.21801	4.45615		1.94111	4.45615		4.53481	4.45615		6.21801	1.09085		1.94111	1.09085		4.53481	1.09085
1.33342	0.15056		0.722466	0.15056		0.298658	0.15056		1.33342	0.526069		0.722466	0.526069		0.298658	0.526069		1.33342	0.124328		0.722466	0.124328		0.298658	0.124328
8.88387	4.23189		7.16752	4.23189		6.68664	4.23189		8.88387	4.65191		7.16752	4.65191		6.68664	4.65191		8.88387	3.55213		7.16752	3.55213		6.68664	3.55213
6.95582	4.36036		2.13093	4.36036		5.02724	4.36036		6.95582	4.87824		2.13093	4.87824		5.02724	4.87824		6.95582	3.6311		2.13093	3.6311		5.02724	3.6311
7.31297	1.95233		6.00742	1.95233		5.64904	1.95233		7.31297	5.22535		6.00742	5.22535		5.64904	5.22535		7.31297	3.43696		6.00742	3.43696		5.64904	3.43696
0.432959	0.505891		0.137504	0.505891		0.137504	0.505891		0.432959	0.632268		0.137504	0.632268		0.137504	0.632268		0.432959	0.286881		0.137504	0.286881		0.137504	0.286881
5.36912	2.79285		6.78921	2.79285		5.66306	2.79285		5.36912	6.19476		6.78921	6.19476		5.66306	6.19476		5.36912	2.42492		6.78921	2.42492		5.66306	2.42492
2.15381	1.97453		0.933573	1.97453		0.933573	1.97453		2.15381	0.632268		0.933573	0.632268		0.933573	0.632268		2.15381	0.321928		0.933573	0.321928		0.933573	0.321928
5.02192	3.29572		5.07125	3.29572		4.55765	3.29572		5.02192	5.03122		5.07125	5.03122		4.55765	5.03122		5.02192	2.58256		5.07125	2.58256		4.55765	2.58256
8.72465	3.0018		6.46173	3.0018		6.10769	3.0018		8.72465	6.4116		6.46173	6.4116		6.10769	6.4116		8.72465	3.63459		6.46173	3.63459		6.10769	3.63459
0.847997	0.070389		0.298658	0.070389		0.475085	0.070389		0.847997	2.17632		0.298658	2.17632		0.475085	2.17632		0.847997	0.887525		0.298658	0.887525		0.475085	0.887525
1.87971	0.505891		0.555816	0.505891		0.731183	0.505891		1.87971	1.91839		0.555816	1.91839		0.731183	1.91839		1.87971	0.526069		0.555816	0.526069		0.731183	0.526069
9.69659	4.8748		7.08799	4.8748		7.37339	4.8748		9.69659	5.25512		7.08799	5.25512		7.37339	5.25512		9.69659	4.27947		7.08799	4.27947		7.37339	4.27947
7.76281	2.93168		5.16068	2.93168		4.9982	2.93168		7.76281	4.9607		5.16068	4.9607		4.9982	4.9607		7.76281	2.38957		5.16068	2.38957		4.9982	2.38957
5.98846	2.27799		3.8125	2.27799		5.8716	2.27799		5.98846	4.72738		3.8125	4.72738		5.8716	4.72738		5.98846	1.49569		3.8125	1.49569		5.8716	1.49569
8.02558	2.36457		5.3505	2.36457		5.84348	2.36457		8.02558	5.69794		5.3505	5.69794		5.84348	5.69794		8.02558	2.06005		5.3505	2.06005		5.84348	2.06005
9.04409	3.849		6.42811	3.849		6.48156	3.849		9.04409	5.46924		6.42811	5.46924		6.48156	5.46924		9.04409	4.01525		6.42811	4.01525		6.48156	4.01525
7.83118	4.45088		4.30232	4.45088		6.76089	4.45088		7.83118	4.33985		4.30232	4.33985		6.76089	4.33985		7.83118	3.21568		4.30232	3.21568		6.76089	3.21568
8.14415	3.80012		4.08491	3.80012		6.1819	3.80012		8.14415	6.28021		4.08491	6.28021		6.1819	6.28021		8.14415	4.0917		4.08491	4.0917		6.1819	4.0917
7.83725	4.08491		6.80465	4.08491		5.25626	4.08491		7.83725	6.3386		6.80465	6.3386		5.25626	6.3386		7.83725	3.17473		6.80465	3.17473		5.25626	3.17473
6.76447	3.35755		3.68482	3.35755		6.12557	3.35755		6.76447	5.85125		3.68482	5.85125		6.12557	5.85125		6.76447	2.04264		3.68482	2.04264		6.12557	2.04264
0.124328	1.02148		0.084064	1.02148		0	1.02148		0.124328	0.137504		0.084064	0.137504		0	0.137504		0.124328	0.31034		0.084064	0.31034		0	0.31034
3.7666	0.275007		0.084064	0.275007		3.27202	0.275007		3.7666	5.23534		0.084064	5.23534		3.27202	5.23534		3.7666	2.45418		0.084064	2.45418		3.27202	2.45418
6.29223	4.80529		5.97016	4.80529		6.0594	4.80529		6.29223	6.23726		5.97016	6.23726		6.0594	6.23726		6.29223	2.7761		5.97016	2.7761		6.0594	2.7761
3.60644	2.83188		0.137504	2.83188		2.31904	2.83188		3.60644	2.43563		0.137504	2.43563		2.31904	2.43563		3.60644	2.31904		0.137504	2.31904		2.31904	2.31904
0.464668	2.59932		0.176323	2.59932		0.189034	2.59932		0.464668	2.47508		0.176323	2.47508		0.189034	2.47508		0.464668	1.14405		0.176323	1.14405		0.189034	1.14405
5.37747	2.7115		5.96162	2.7115		5.09677	2.7115		5.37747	4.34056		5.96162	4.34056		5.09677	4.34056		5.37747	4.27426		5.96162	4.27426		5.09677	4.27426
5.13258	3.10769		3.17473	3.10769		1.9855	3.10769		5.13258	2.17632		3.17473	2.17632		1.9855	2.17632		5.13258	1.63691		3.17473	1.63691		1.9855	1.63691
5.98937	2.27202		5.45154	2.27202		5.20906	2.27202		5.98937	4.34696		5.45154	4.34696		5.20906	4.34696		5.98937	2.15381		5.45154	2.15381		5.20906	2.15381
8.96023	2.50589		5.43563	2.50589		7.15036	2.50589		8.96023	5.51853		5.43563	5.51853		7.15036	5.51853		8.96023	3.47638		5.43563	3.47638		7.15036	3.47638
3.74201	1.13093		0.028569	1.13093		5.90207	1.13093		3.74201	3.13586		0.028569	3.13586		5.90207	3.13586		3.74201	1.70487		0.028569	1.70487		5.90207	1.70487
4.53854	4.57168		2.47249	4.57168		4.62702	4.57168		4.53854	5.29903		2.47249	5.29903		4.62702	5.29903		4.53854	3.43029		2.47249	3.43029		4.62702	3.43029
6.10056	0.298658		5.80839	0.298658		5.43563	0.298658		6.10056	4.68257		5.80839	4.68257		5.43563	4.68257		6.10056	1.30451		5.80839	1.30451		5.43563	1.30451
6.51475	4.42021		6.66903	4.42021		5.26903	4.42021		6.51475	6.33878		6.66903	6.33878		5.26903	6.33878		6.51475	0.485427		6.66903	0.485427		5.26903	0.485427
6.87553	1.83592		4.8485	1.83592		6.51932	1.83592		6.87553	4.77083		4.8485	4.77083		6.51932	4.77083		6.87553	3.83086		4.8485	3.83086		6.51932	3.83086
1.26303	1.66903		0.321928	1.66903		0.333424	1.66903		1.26303	2.68257		0.321928	2.68257		0.333424	2.68257		1.26303	0.695994		0.321928	0.695994		0.333424	0.695994
0.613532	2.61117		0.176323	2.61117		0.275007	2.61117		0.613532	3.27352		0.176323	3.27352		0.275007	3.27352		0.613532	0.545968		0.176323	0.545968		0.275007	0.545968
1.07039	0.056584		0.356144	0.056584		0.263034	0.056584		1.07039	1.62293		0.356144	1.62293		0.263034	1.62293		1.07039	0.641546		0.356144	0.641546		0.263034	0.641546
8.70902	2.7761		5.61736	2.7761		5.92861	2.7761		8.70902	5.7811		5.61736	5.7811		5.92861	5.7811		8.70902	3.66676		5.61736	3.66676		5.92861	3.66676
7.981	3.16671		7.28151	3.16671		6.32175	3.16671		7.981	5.64357		7.28151	5.64357		6.32175	5.64357		7.981	3.07211		7.28151	3.07211		6.32175	3.07211
9.2149	3.96532		7.00192	3.96532		6.90497	3.96532		9.2149	6.30943		7.00192	6.30943		6.90497	6.30943		9.2149	3.27352		7.00192	3.27352		6.90497	3.27352
6.54844	1		2.0072	1		5.45976	1		6.54844	2.5656		2.0072	2.5656		5.45976	2.5656		6.54844	3.15704		2.0072	3.15704		5.45976	3.15704
0.695994	0.378512		0.137504	0.378512		4.31034	0.378512		0.695994	0.594549		0.137504	0.594549		4.31034	0.594549		0.695994	0.650765		0.137504	0.650765		4.31034	0.650765
5.96555	3.24031		3.80941	3.24031		6.25927	3.24031		5.96555	5.52638		3.80941	5.52638		6.25927	5.52638		5.96555	2.02857		3.80941	2.02857		6.25927	2.02857
0.584963	0.238787		0.137504	0.238787		0.163499	0.238787		0.584963	0.189034		0.137504	0.189034		0.163499	0.189034		0.584963	0.807355		0.137504	0.807355		0.163499	0.807355
2.17951	0.056584		1.66903	0.056584		0.831877	0.056584		2.17951	0.790772		1.66903	0.790772		0.831877	0.790772		2.17951	1.62293		1.66903	1.62293		0.831877	1.62293
6.27984	1.5509		5.48832	1.5509		4.25777	1.5509		6.27984	3.40054		5.48832	3.40054		4.25777	3.40054		6.27984	2.09761		5.48832	2.09761		4.25777	2.09761
8.44593	3.64961		7.4192	3.64961		5.77873	3.64961		8.44593	5.2292		7.4192	5.2292		5.77873	5.2292		8.44593	4.70487		7.4192	4.70487		5.77873	4.70487
2.33342	1.76977		1.04963	1.76977		4.2426	1.76977		2.33342	2.64846		1.04963	2.64846		4.2426	2.64846		2.33342	4.06005		1.04963	4.06005		4.2426	4.06005
8.30784	4.42089		7.43095	4.42089		5.97728	4.42089		8.30784	3.99005		7.43095	3.99005		5.97728	3.99005		8.30784	2.43029		7.43095	2.43029		5.97728	2.43029
0.782409	0.443607		0.286881	0.443607		0.321928	0.443607		0.782409	0.687061		0.286881	0.687061		0.321928	0.687061		0.782409	0.903038		0.286881	0.903038		0.321928	0.903038
10.2652	3.06005		7.19584	3.06005		6.64169	3.06005		10.2652	5.75676		7.19584	5.75676		6.64169	5.75676		10.2652	1.68706		7.19584	1.68706		6.64169	1.68706
7.83933	3.1127		7.00383	3.1127		6.75889	3.1127		7.83933	5.91409		7.00383	5.91409		6.75889	5.91409		7.83933	1.95233		7.00383	1.95233		6.75889	1.95233
4.37156	2.97085		1.13093	2.97085		4.43429	2.97085		4.37156	4.28836		1.13093	4.28836		4.43429	4.28836		4.37156	2.94111		1.13093	2.94111		4.43429	2.94111

## Sheet: Figure 7-Figure Supplement 1B
Breast Cancer			Lung Cancer			Colorectal Cancer			Breast Cancer			Lung Cancer			Colorectal Cancer			Breast Cancer			Lung Cancer			Colorectal Cancer
CCN2 log2(TPM+1) Expression 22Q1 Public	SAMD4A log2(TPM+1) Expression 22Q1 Public		CCN2 log2(TPM+1) Expression 22Q1 Public	SAMD4A log2(TPM+1) Expression 22Q1 Public		CCN2 log2(TPM+1) Expression 22Q1 Public	SAMD4A log2(TPM+1) Expression 22Q1 Public		CCN2 log2(TPM+1) Expression 22Q1 Public	SAMD4A log2(TPM+1) Expression 22Q1 Public		CCN2 log2(TPM+1) Expression 22Q1 Public	SAMD4A log2(TPM+1) Expression 22Q1 Public		CCN2 log2(TPM+1) Expression 22Q1 Public	SAMD4A log2(TPM+1) Expression 22Q1 Public		CCN2 log2(TPM+1) Expression 22Q1 Public	SAMD4A log2(TPM+1) Expression 22Q1 Public		CCN2 log2(TPM+1) Expression 22Q1 Public	SAMD4A log2(TPM+1) Expression 22Q1 Public		CCN2 log2(TPM+1) Expression 22Q1 Public	SAMD4A log2(TPM+1) Expression 22Q1 Public
4.16591	2.3978	r = 0.720	0.9855	1.74846	r = 0.612	3.21101	0.555816	r = 0.354	4.16591	4.31759	r = 0.414	0.9855	4.89191	r = 0.602	3.21101	4.01257	r = 0.302	4.16591	1.43829	r = 0.527	0.9855	0.389567	r = 0.654	3.21101	0.042644	r = 0.245
4.38267	3.66106	P= 2.80E-11	2.61353	1.82782	P= 2.16E-20	7.35658	3.24641	P= 2.14E-3	4.38267	4.83996	P= 7.54E-4	2.61353	2.92979	P= 1.30E-19	7.35658	5.74712	P= 0.0104	4.38267	2.0072	P= 9.32E-6	2.61353	0.286881	P= 5.47E-24	7.35658	3.66562	P= 0.040
3.3799	1.93734		0.956057	0.903038		4.50399	4.98185		3.3799	4.55643		0.956057	2.58256		4.50399	6.14507		3.3799	0.176323		0.956057	0.536053		4.50399	1.20163
4.13996	0.15056		5.87012	4.12267		1.82375	0.85599		4.13996	5.1807		5.87012	3.97453		1.82375	4.26003		4.13996	0.163499		5.87012	3.74308		1.82375	4.0036
10.1628	6.36036		1.0072	0.31034		1.90689	1.90689		10.1628	5.12516		1.0072	2.41684		1.90689	4.52482		10.1628	4.30597		1.0072	0.238787		1.90689	1.41684
0.765535	2.27799		1.27501	0.189034		2.96162	3.75489		0.765535	4.54597		1.27501	2.25096		2.96162	5.51979		0.765535	3.03386		1.27501	0.111031		2.96162	3.70708
6.46956	2.65535		3.36737	3.70044		2.85	1.76554		6.46956	5.5008		3.36737	5.24374		2.85	5.09297		6.46956	4.35403		3.36737	1.926		2.85	0.367371
2.07382	2.06695		4.52356	2.8679		0.757023	0.432959		2.07382	5.73227		4.52356	5.06824		0.757023	4.749		2.07382	1.33342		4.52356	2.39506		0.757023	0.443607
0.389567	0.757023		6.70736	2.51853		1.97453	1.14405		0.389567	3.89918		6.70736	5.34908		1.97453	2.79494		0.389567	0.238787		6.70736	4.61294		1.97453	0.226509
0.978196	3.3505		4.67976	3.51728		2.35896	2.60881		0.978196	5.85649		4.67976	5.67271		2.35896	4.34625		0.978196	2.16027		4.67976	0.62293		2.35896	2.25701
2.40871	1.20789		0.575312	0.956057		3.64616	2.52857		2.40871	5.74927		0.575312	2.98002		3.64616	5.24755		2.40871	0.555816		0.575312	0.485427		3.64616	1.43296
3.66676	3.14893		2.94298	3.53854		1.98914	1.94111		3.66676	4.54411		2.94298	5.26978		1.98914	4.35614		3.66676	3.24031		2.94298	1.45418		1.98914	0.485427
4.36036	2.8339		3.28244	3.93263		2.21101	2.90689		4.36036	5.08789		3.28244	5.70846		2.21101	4.89627		4.36036	2.49569		3.28244	3.15543		2.21101	0.495695
1.86394	2.31325		5.70984	1.73552		6.9364	0.028569		1.86394	4.28614		5.70984	2.95791		6.9364	1.04963		1.86394	0.15056		5.70984	1.04264		6.9364	0.014355
6.94416	2.12763		0.485427	0.422233		3.05311	4.8505		6.94416	3.53481		0.485427	0.356144		3.05311	6.50859		6.94416	0.485427		0.485427	0.678072		3.05311	5.15785
4.26828	2.65306		4.57046	3.8679		1.22033	0.963474		4.26828	3.26454		4.57046	5.17353		1.22033	3.25399		4.26828	2.57046		4.57046	4.19298		1.22033	0.344828
0.411426	0.464668		0.863938	4.18507		6.69167	3.21257		0.411426	0.713696		0.863938	6.7174		6.69167	5.87725		0.411426	0.201634		0.863938	0.226509		6.69167	3.23266
0.992768	1.9486		1.14405	2.30743		1.1375	1.0635		0.992768	1.93357		1.14405	4.47444		1.1375	4.32984		0.992768	0.097611		1.14405	0.678072		1.1375	0.422233
6.99718	4.63169		6.0376	3.34767		2.22342	3.7666		6.99718	4.94533		6.0376	6.41566		2.22342	5.51349		6.99718	2.51853		6.0376	4.05918		2.22342	0.704872
11.6176	5.53138		1.05658	3.54473		1.15056	3.08576		11.6176	5.33664		1.05658	5.27538		1.15056	3.04614		11.6176	4.59156		1.05658	0.659925		1.15056	0.250962
0.389567	0.613532		0.226509	0.176323		3.33342	2.41954		0.389567	4.50271		0.226509	1.67356		3.33342	3.98185		0.389567	0.028569		0.226509	0.918386		3.33342	0.124328
6.69599	2.99458		5.25777	4.44493		2.488	2.60881		6.69599	3.41954		5.25777	6.34181		2.488	3.31615		6.69599	0.238787		5.25777	3.85499		2.488	3.07211
2.82985	2.85599		6.15805	5.2211		4.393	3.69822		2.82985	3.83289		6.15805	5.84172		4.393	6.23419		2.82985	0.124328		6.15805	5.32012		4.393	1.01435
1.70487	1.7866		4.65993	2.02503		1.90689	1.81967		1.70487	3.99729		4.65993	6.08428		1.90689	5.61206		1.70487	0.31034		4.65993	1.57046		1.90689	0.400538
1.91457	1.852		0.111031	0.238787		0.176323	0.189034		1.91457	3.08066		0.111031	0.941106		0.176323	5.30852		1.91457	1.28096		0.111031	0.356144		0.176323	2.16671
6.46467	4.0268		2.80323	2.20789		1.04264	2.11437		6.46467	3.1811		2.80323	5.86567		1.04264	3.9514		6.46467	3.34625		2.80323	2.43029		1.04264	0.411426
2.58976	3.02503		1.79494	2.46205		0.263034	0.411426		2.58976	4.03386		1.79494	4.0321		0.263034	3.80116		2.58976	3.65306		1.79494	0.189034		0.263034	0.111031
5.25965	3.96347		7.58916	5.25286		2.71589	3.38543		5.25965	3.848		7.58916	5.92053		2.71589	5.06221		5.25965	5.30049		7.58916	4.14568		2.71589	0.097611
3.35473	3.14568		1.07039	2.01436		2.74846	3.91073		3.35473	4.75596		1.07039	2.86592		2.74846	4.70929		3.35473	5.10601		1.07039	0.641546		2.74846	1.20163
0.275007	0.042644		0.263034	1.63227		3.61353	2.70929		0.275007	2.9782		0.263034	1.50589		3.61353	5.51916		0.275007	0.367371		0.263034	0.641546		3.61353	0.454176
3.66335	2.09761		5.0343	2.49314		3.43563	3.35191		3.66335	4.27873		5.0343	5.71342		3.43563	5.21413		3.66335	0.85599		5.0343	4.22265		3.43563	1.04264
0.321928	0.214125		3.64386	0.070389		1.0072	4.09761		0.321928	2.41143		3.64386	0.757023		1.0072	3.90014		0.321928	2.03914		3.64386	0.411426		1.0072	3.24793
3.45812	1.36737		5.72	4.90014		3.15704	2.95606		3.45812	4.60229		5.72	6.26529		3.15704	4.16832		3.45812	1.99639		5.72	2.21101		3.15704	1.90304
1.95606	2.89336		4.73877	4.03386		4.48671	1.7137		1.95606	2.32769		4.73877	6.1127		4.48671	5.6094		1.95606	2.64846		4.73877	2.87381		4.48671	2.8953
0.15056	0.042644		10.2984	5.82756		1.848	1.04963		0.15056	2.64386		10.2984	5.72928		1.848	5.52857		0.15056	1.0635		10.2984	4.23496		1.848	0.978196
6.06931	2.74846		3.89821	4.29057		1.61824	2.21723		6.06931	5.53169		3.89821	4.88362		1.61824	5.06134		6.06931	1.35614		3.89821	3.18269		1.61824	0.505891
0.389567	1.01435		2.70487	0.739848		1.20163	2.14731		0.389567	4.7845		2.70487	4.27873		1.20163	3.41414		0.389567	1.64155		2.70487	5.15462		1.20163	0.097611
7.47824	4.26153		3.19377	5.22766		2.38405	2.21413		7.47824	6.27612		3.19377	6.6311		2.38405	3.89627		7.47824	3.42895		3.19377	1.01435		2.38405	0.028569
0.238787	0.176323		0.189034	4.13011		3.6017	1.40054		0.238787	3.79701		0.189034	3.74416		3.6017	6.30415		0.238787	0.925999		0.189034	3.37574		3.6017	0.584963
2.75061	2.31615		1	3.22497		0.286881	0.863938		2.75061	5.02237		1	2.54597		0.286881	3.63807		2.75061	1.72683		1	0.432959		0.286881	0.070389
0.454176	1.9782		5.24717	3.26604		1.09085	2.93734		0.454176	4.8334		5.24717	6.22265		1.09085	5.73715		0.454176	0.650765		5.24717	4.40327		1.09085	0.443607
3.69933	1.07039		7.14609	3.51979		2.65764	4.50399		3.69933	3.9542		7.14609	5.42425		2.65764	5.95977		3.69933	0.731183		7.14609	3.74631		2.65764	4.29572
1.58976	0.056584		5.10014	5.16872		3.20789	3.13093		1.58976	4.2891		5.10014	5.93192		3.20789	4.94533		1.58976	0.782409		5.10014	4.74362		3.20789	0.214125
0.378512	4.41143		8.86771	3.80735		2.93734	0.933573		0.378512	5.02237		8.86771	5.60792		2.93734	3.18269		0.378512	2.75061		8.86771	3.31034		2.93734	0.097611
6.7256	2.1375		5.84373	2.16671		3.24641	2.36177		6.7256	4.82477		5.84373	6.00225		3.24641	5.07382		6.7256	2.32193		5.84373	3.73118		3.24641	0.275007
1.89918	2.10769		4.86443	1.11103		6.25286	3.37295		1.89918	5.10727		4.86443	5.64443		6.25286	4.95187		1.89918	2.29278		4.86443	4.54473		6.25286	3.64731
5.53823	2.67807		4.57652	1.27501		2.64846	1.03562		5.53823	4.6837		4.57652	2.50335		2.64846	4.3427		5.53823	2.1375		4.57652	1.40054		2.64846	1.24489
0.516015	0.042644		0.238787	2.08406		0.687061	0.344828		0.516015	0.594549		0.238787	0.432959		0.687061	3.17951		0.516015	0.321928		0.238787	0.367371		0.687061	1.36737
3.0321	3.10266		5.59813	4.42358		2.19849	0.111031		3.0321	5.50875		5.59813	6.67412		2.19849	4.26754		3.0321	2.14078		5.59813	0.659925		2.19849	0.641546
1.10434	1.55582		6.07468	5.08534		2.24489	3.67243		1.10434	3.71918		6.07468	4.64674		2.24489	4.94813		1.10434	1.01435		6.07468	2.56316		2.24489	0.298658
0.333424	0.526069		0.757023	2.11437		1.23266	0.422233		0.333424	1.64155		0.757023	1.46989		1.23266	3.95606		0.333424	0.056584		0.757023	0.799087		1.23266	1.90689
2.22651	0.014355		6.91361	4.30159		1.43829	0.948601		2.22651	3.90785		6.91361	6.85262		1.43829	2.96901		2.22651	0.042644		6.91361	3.23726		1.43829	0.097611
0.367371	2.27799		5.74846	5.23304		1.41684	0.201634		0.367371	3.75489		5.74846	6.55551		1.41684	4.34979		0.367371	0.594549		5.74846	3.36877		1.41684	0.475085
4.13258	3.24641		4.03122	4.38543		5.09929	3.43829		4.13258	3.78555		4.03122	6.4494		5.09929	5.47638		4.13258	0.15056		4.03122	2.21101		5.09929	2.41684
6.76062	4.2211		2.96347	1.67356		2.41684	3.46728		6.76062	5.88947		2.96347	1.45418		2.41684	5.71534		6.76062	3.83491		2.96347	0.263034		2.41684	3.08576
6.17772	3.36877		0.669027	0.485427		0.378512	0.275007		6.17772	4.83744		0.669027	2.25096		0.378512	3.56803		6.17772	3.17632		0.669027	1.32193		0.378512	0.903038
2.43829	1.79909		7.72649	5.27053		3.79077	2.96347		2.43829	3.39369		7.72649	5.8627		3.79077	5.74551		2.43829	3.35614		7.72649	3.66221		3.79077	0.485427
8.61497	5.02945		2.5509	4.36597		3.32481	4.35826		8.61497	5.43496		2.5509	5.19535		3.32481	5.34625		8.61497	3.25248		2.5509	2.20477		3.32481	0.765535
1.48543	1.60881		3.45943	0.565597		0.056584	2.67807		1.48543	4.03914		3.45943	1.5008		0.056584	4.64846		1.48543	3.10936		3.45943	0.970854		0.056584	3.9222
1.5509	3.29572		6.93109	2.88753		1.26903	1.62761		1.5509	5.03122		6.93109	2.40327		1.26903	4.54844		1.5509	2.58256		6.93109	0.765535		1.26903	0.948601
5.24565	2.27202		5.25058	5.74228		2.47768	3.98914		5.24565	4.34696		5.25058	6.02215		2.47768	4.87578		5.24565	2.15381		5.25058	2.98368		2.47768	1.91457
			4.84649	3.14405		3.31759	3.29131					4.84649	3.43563		3.31759	4.83643					4.84649	1.96717		3.31759	0.748461
			3.61117	1.37851		2.02503	2.29278					3.61117	3.44228		2.02503	5.05311					3.61117	3.33199		2.02503	0.286881
			8.11114	2.23573		2.07039	2.18269					8.11114	5.75889		2.07039	4.65076					8.11114	3.87676		2.07039	0.464668
			6.97166	3.51096		3.33628	3.55459					6.97166	7.78175		3.33628	5.24298					6.97166	4.75168		3.33628	1.38957
			1.04264	0.275007		0.773996	4.06953					1.04264	3.92315		0.773996	5.73335					1.04264	0.201634		0.773996	2.97453
			5.00135	4.55336		6.32121	3.45154					5.00135	6.16611		6.32121	6.66832					5.00135	4.9644		6.32121	0.731183
			5.86146	4.62819		2.38405	1.43829					5.86146	6.90099		2.38405	3.61235					5.86146	4.58556		2.38405	0.214125
			2.22033	1.24489		0.485427	1.04963					2.22033	0.594549		0.485427	4.89142					2.22033	0.669027		0.485427	0.356144
			3.85798	2.50589		4.30451	1.65993					3.85798	4.10518		4.30451	5.13134					3.85798	1.67807		4.30451	0.594549
			1.67807	4.05918		5.98276	3.10936					1.67807	4.07039		5.98276	4.8679					1.67807	1.0072		5.98276	4.32121
			4.98869	4.70487								4.98869	7.04516								4.98869	2.34483
			0.545968	0.238787								0.545968	0.275007								0.545968	0.584963
			9.86295	0.757023								9.86295	4.26003								9.86295	3.72901
			0.594549	3.43029								0.594549	5.39232								0.594549	2.54102
			6.58014	1.20163								6.58014	6.03672								6.58014	3.79181
			0.070389	0.097611								0.070389	1.60881								0.070389	0.367371
			9.27445	5.44791								9.27445	5.86716								9.27445	5.15866
			6.2317	5.5659								6.2317	5.19967								6.2317	3.03386
			6.69891	4.0365								6.69891	6.79688								6.69891	0.565597
			0.333424	1.98914								0.333424	4.14568								0.333424	0.056584
			1.30451	0.097611								1.30451	0.704872								1.30451	0.422233
			3.29572	1.58014								3.29572	1.69599								3.29572	0.028569
			0.214125	0.757023								0.214125	0.176323								0.214125	1.09085
			0.526069	1.26303								0.526069	5.849								0.526069	1.12433
			5.82477	4.17712								5.82477	2.81762								5.82477	0.475085
			0.124328	0.201634								0.124328	0.641546								0.124328	0.422233
			1.76128	2.71809								1.76128	5.30451								1.76128	3.86592
			5.83643	3.33485								5.83643	4.86493								5.83643	2.56316
			1.18269	0.275007								1.18269	2.37851								1.18269	0.056584
			1.05658	0.286881								1.05658	2.26604								1.05658	0.176323
			6.96578	4.53294								6.96578	6.01792								6.96578	4.86146
			0.731183	1.02148								0.731183	0.367371								0.731183	0.070389
			4.95931	2.51096								4.95931	4.88215								4.95931	0.799087
			4.97269	1.21412								4.97269	5.27984								4.97269	3.07382
			1.92979	3.88362								1.92979	5.88582								1.92979	0.895303
			5.1206	2.9222								5.1206	5.28725								5.1206	3.73552
			4.46271	4.01436								4.46271	5.81737								4.46271	2.22959
			2.01078	1.81147								2.01078	5.21762								2.01078	2.27799
			5.87209	4.38819								5.87209	6.24012								5.87209	4.21645
			3.41278	2.60881								3.41278	4.68538								3.41278	0.111031
			4.68538	4.25626								4.68538	6.43279								4.68538	1.73118
			5.99322	4.35332								5.99322	5.45615								5.99322	3.926
			4.95652	3.10936								4.95652	5.31723								4.95652	3.08746
			5.13545	3.6241								5.13545	4.98231								5.13545	1.97085
			0.687061	0.505891								0.687061	1.47508								0.687061	1.36177
			0.704872	1.70487								0.704872	6.21315								0.704872	0.970854
			6.94017	4.10936								6.94017	5.77294								6.94017	1.83592
			3.35473	4.03386								3.35473	5.72083								3.35473	6.09908
			0.454176	0.111031								0.454176	1.29866								0.454176	1.18269
			6.06393	3.99548								6.06393	5.0492								6.06393	1.10434
			5.62615	4.76871								5.62615	5.80038								5.62615	0.831877
			6.64904	4.46597								6.64904	5.31361								6.64904	4.69655
			1.87578	2.44095								1.87578	3.05485								1.87578	0.189034
			6.04702	5.24146								6.04702	5.97842								6.04702	4.35966
			0.400538	0.124328								0.400538	2.6017								0.400538	1.74846
			5.04483	3.76553								5.04483	4.92742								5.04483	1.34483
			1.48026	2.38405								1.48026	2.31904								1.48026	0.286881
			3.81455	3.44228								3.81455	4.70266								3.81455	0.042644
			2.34767	3.56682								2.34767	4.1035								2.34767	0.695994
			0.773996	0.594549								0.773996	4.11686								0.773996	0.963474
			2.11769	1.774								2.11769	5.98231								2.11769	0.948601
			6.63967	3.18269								6.63967	5.61029								6.63967	5.05355
			3.39094	3.31759								3.39094	4.35896								3.39094	3.99096
			4.42895	5.34625								4.42895	6.88423								4.42895	0.411426
			0.226509	0.226509								0.226509	2.03914								0.226509	0.321928
			5.96717	4.37643								5.96717	5.75275								5.96717	3.48414
			4.52419	4.33056								4.52419	4.16189								4.52419	3.93357
			0.678072	0.070389								0.678072	3.01792								0.678072	0.163499
			5.04527	2.56316								5.04527	3.847								5.04527	1.25701
			0.970854	3.90785								0.970854	0.545968								0.970854	0.641546
			0.604071	2.49314								0.604071	3.61706								0.604071	0.176323
			0.238787	0.111031								0.238787	1.31034								0.238787	0.641546
			10.395	5.13175								10.395	8.36089								10.395	4.43763
			6.27352	3.22805								6.27352	4.05745								6.27352	3.80116
			3.16993	3.35473								3.16993	5.34802								3.16993	0.575312
			0.189034	0.31034								0.189034	3.54967								0.189034	0.823749
			3.43296	4.31034								3.43296	5.94158								3.43296	4.48993
			3.04963	0.887525								3.04963	5.88313								3.04963	3.14568
			4.5656	3.34483								4.5656	5.6153								4.5656	2.58014
			0.722466	0.704872								0.722466	2.08746								0.722466	0.956057
			2.58014	1.9222								2.58014	5.23688								2.58014	1.33914
			9.68851	0.925999								9.68851	5.09592								9.68851	4.76075
			3.0072	3.89433								3.0072	5.8674								3.0072	1.39506
			4.86641	3.0018								4.86641	4.28021								4.86641	1.12433
			7.65499	3.44095								7.65499	4.56803								7.65499	3.37016
			5.79051	3.20477								5.79051	5.74551								5.79051	3.35332
			4.35332	2.79494								4.35332	3.67694								4.35332	0.389567
			0.124328	0.321928								0.124328	1.0072								0.124328	0.214125
			8.75141	1.34483								8.75141	4.78083								8.75141	4.96023
			2.41954	4.93121								2.41954	5.99887								2.41954	2.19535
			8.25493	4.40463								8.25493	6.87406								8.25493	3.68145
			3.91169	2.6893								3.91169	5.92244								3.91169	4.04789
			1.25701	1								1.25701	4.45943								1.25701	0.887525
			0.163499	1.78241								0.163499	0.464668								0.163499	2.53107
			6.0881	2.80116								6.0881	5.36562								6.0881	3.15381
			8.67525	4.22188								8.67525	6.67044								8.67525	3.78136
			7.32885	3.91361								7.32885	6.61809								7.32885	1.91073
			1.60407	4.41616								1.60407	5.7252								1.60407	3.53605
			6.0505	4.6792								6.0505	4.91552								6.0505	3.95047
			9.07254	3.46728								9.07254	6.80038								9.07254	2.84398
			2.56316	4.17313								2.56316	5.43162								2.56316	0.250962
			2.3505	3.21568								2.3505	5.89385								2.3505	0.389567
			7.62812	3.18903								7.62812	6.83529								7.62812	4.17792
			7.18269	4.36107								7.18269	6.03474								7.18269	2.55336
			3.61706	1.9486								3.61706	5.43162								3.61706	0.454176
			2.45154	2.58976								2.45154	4.84699								2.45154	0.201634
			0.321928	0.443607								0.321928	4.77821								0.321928	0.475085
			4.58857	3.31615								4.58857	5.1639								4.58857	1.77821
			6.05203	3.0036								6.05203	4.54411								6.05203	2.854
			4.70763	3.94579								4.70763	3.54967								4.70763	2.23266
			0.526069	0.070389								0.526069	1.04264								0.526069	0.526069
			4.80632	3.58976								4.80632	6.7362								4.80632	3.11103
			3.12267	1.68706								3.12267	0.536053								3.12267	0.189034
			2.93923	4.13668								2.93923	5.28983								2.93923	2.08746
			0.555816	0.632268								0.555816	0.992768								0.555816	0.15056
			8.44588	5.46467								8.44588	6.1807								8.44588	2.36457
			1.61824	2.96162								1.61824	4.81044								1.61824	0.863938
			1.852	3.90304								1.852	4.63981								1.852	0.918386
			3.53107	2.34199								3.53107	4.35755								3.53107	2.16993
			0.189034	0.31034								0.189034	3.9542								0.189034	0.594549
			0.321928	0.298658								0.321928	3.42895								0.321928	0.687061
			2.68706	0.871844								2.68706	4.6094								2.68706	0.85599
			7.06512	4.85499								7.06512	3.72901								7.06512	4.17712
			0.070389	0.263034								0.070389	1.17632								0.070389	0.933573
			2.06005	2.89336								2.06005	5.01569								2.06005	0.575312
			4.58195	3.60644								4.58195	6.59485								4.58195	2.16671
			0.526069	3.2342								0.526069	1.19535								0.526069	1.0635
			3.0993	3.06178								3.0993	3.61589								3.0993	0.201634
			4.71809	2.6017								4.71809	4.81044								4.71809	0.263034
			1.38405	0.111031								1.38405	1.43829								1.38405	0.765535
			5.86419	3.34199								5.86419	4.06178								5.86419	3.43162
			2.38957	0.321928								2.38957	0.831877								2.38957	0.226509
			0.669027	2.72683								0.669027	1.15056								0.669027	1.13093
			0.344828	2.69822								0.344828	5.08364								0.344828	1.85997
			0.201634	0.475085								0.201634	1.37295								0.201634	0.687061
			0.823749	0.526069								0.823749	0.925999								0.823749	0.584963
			8.59425	3.29866								8.59425	5.32769								8.59425	3.64846
			1.81557	2.17632								1.81557	3.55336								1.81557	3.52732
			2.99458	2.79285								2.99458	6.19476								2.99458	2.42492
			4.67242	3.0018								4.67242	6.4116								4.67242	3.63459
			6.06652	4.45088								6.06652	4.33985								6.06652	3.21568
			6.10518	3.80012								6.10518	6.28021								6.10518	4.0917
			4.63227	3.35755								4.63227	5.85125								4.63227	2.04264
			4.0054	2.7115								4.0054	4.34056								4.0054	4.27426
			5.18468	1.83592								5.18468	4.77083								5.18468	3.83086
			0.163499	0.378512								0.163499	0.594549								0.163499	0.650765

## Sheet: Figure 7-Figure Supplement 1C
	Brain Cancer								Thyroid Cancer
CCN1 log2(TPM+1) Expression 22Q1 Public	PNRC1 log2(TPM+1) Expression 22Q1 Public		AXL log2(TPM+1) Expression 22Q1 Public	PNRC1 log2(TPM+1) Expression 22Q1 Public		AMOTL2 log2(TPM+1) Expression 22Q1 Public	PNRC1 log2(TPM+1) Expression 22Q1 Public		CCN1 log2(TPM+1) Expression 22Q1 Public	PNRC1 log2(TPM+1) Expression 22Q1 Public		AXL log2(TPM+1) Expression 22Q1 Public	PNRC1 log2(TPM+1) Expression 22Q1 Public		AMOTL2 log2(TPM+1) Expression 22Q1 Public	PNRC1 log2(TPM+1) Expression 22Q1 Public
4.02237	4.61471	r = -0.234	4.60288	4.61471	r = -0.256	3.18745	4.61471	r = -0.329	1.49569	5.60822	r = -0.413	0.604071	5.60822	r = -0.556	2.42223	5.60822	r = -0.653
4.87774	3.40735	P= 0.0155	7.24755	3.40735	P= 0.0057	5.13709	3.40735	P= 0.0013	10.5179	3.3978	P= 0.0991	7.36658	3.3978	P= 0.0206	6.15866	3.3978	P= 0.0045
9.59412	2.43296		8.16335	2.43296		7.3311	2.43296		7.32319	3.27501		7.66356	3.27501		5.67497	3.27501
3.0321	5.36142		0.613532	5.36142		2.98002	5.36142		8.55551	3.69153		6.92481	3.69153		5.10852	3.69153
6.65993	1.87578		7.66739	1.87578		4.33056	1.87578		6.99537	3.68594		6.53232	3.68594		5.55765	3.68594
8.94348	2.96162		6.9424	2.96162		6.19239	2.96162		9.57314	5.26454		7.14832	5.26454		4.77241	5.26454
9.76129	3.70155		6.9847	3.70155		6.02126	3.70155		7.3015	6.75916		5.70432	6.75916		4.34341	6.75916
9.61717	5.89045		8.77436	5.89045		4.78293	5.89045		9.99789	3.6311		7.36833	3.6311		5.45779	3.6311
8.01976	4.63865		7.7911	4.63865		5.8212	4.63865		9.25385	3.66335		8.47675	3.66335		7.73057	3.66335
7.4614	3.42223		3.98185	3.42223		5.12101	3.42223		9.41062	4.74685		7.78267	4.74685		5.88411	4.74685
6.77479	7.04297		5.07082	7.04297		4.62702	7.04297		9.09853	4.42358		6.67158	4.42358		5.80555	4.42358
2.51096	3.7301		0.201634	3.7301		5.8515	3.7301		7.19957	6.22689		4.94345	6.22689		4.26754	6.22689
2.74631	5.45582		0.014355	5.45582		5.43796	5.45582		6.66931	5.95768		6.27929	5.95768		4.97774	5.95768
10.4487	3.09424		7.89336	3.09424		6.14486	3.09424		9.39605	5.56194		6.85786	5.56194		4.24641	5.56194
9.16297	4.87283		6.85562	4.87283		6.50906	4.87283		9.54233	3.25096		7.87682	3.25096		6.59515	3.25096
6.26828	6.05355		7.13402	6.05355		6.08172	6.05355		8.52791	5.23688		6.78699	5.23688		6.05007	5.23688
9.22306	3.07895		6.91994	3.07895		5.75355	3.07895		7.76281	5.6907		5.16068	5.6907		4.9982	5.6907
7.76049	3.37851		6.61412	3.37851		5.28466	3.37851
7.93993	3.95884		6.45187	3.95884		6.08343	3.95884
8.00236	4.10434		6.43062	4.10434		7.66106	4.10434
6.83819	3.09085		7.98242	3.09085		4.87086	3.09085
7.94942	3.86295		4.91695	3.86295		5.42727	3.86295
9.36144	4.49761		7.00574	4.49761		6.21645	4.49761
8.07296	4.82883		7.05039	4.82883		4.3799	4.82883
7.28457	5.30998		5.34767	5.30998		5.02636	5.30998
7.89899	5.16028		5.88582	5.16028		4.95884	5.16028
8.15639	5.24222		7.09993	5.24222		5.26566	5.24222
9.4289	4.97269		7.91307	4.97269		6.0268	4.97269
7.92035	3.854		6.86257	3.854		5.19967	3.854
9.38405	4.40803		7.07243	4.40803		7.55167	4.40803
9.78997	4.23879		7.66541	4.23879		7.07254	4.23879
9.69465	3.07039		7.96728	3.07039		6.79207	3.07039
6.44327	3.53356		5.92813	3.53356		4.14486	3.53356
5.14486	4.24108		6.79883	4.24108		5.10643	4.24108
5.53138	4.26604		0.495695	4.26604		4.851	4.26604
5.77004	5.6659		5.46205	5.6659		5.10224	5.6659
8.10607	4.91169		6.14016	4.91169		5.31179	4.91169
8.41485	3.59932		7.30743	3.59932		6.04483	3.59932
8.12107	4.9514		6.4591	4.9514		6.12763	4.9514
8.31075	3.59335		6.13525	3.59335		5.06695	3.59335
6.53916	5.15421		4.39575	5.15421		4.39849	5.15421
7.60133	4.82477		5.10643	4.82477		5.95094	4.82477
9.74468	4.95233		7.84128	4.95233		6.65019	4.95233
5.06393	6.21062		5.47768	6.21062		2.78031	6.21062
8.89721	4.854		4.43962	4.854		5.75221	4.854
8.39866	3.50716		7.90659	3.50716		5.92101	3.50716
8.58368	3.13093		7.14323	3.13093		6.21704	3.13093
8.39416	2.53854		7.0994	2.53854		6.44062	2.53854
7.62877	3.80012		7.15937	3.80012		4.36597	3.80012
8.97805	3.15381		6.61206	3.15381		6.0197	3.15381
9.91278	5.15543		7.75882	5.15543		6.42089	5.15543
5.69599	3.63227		6.48156	3.63227		5.13299	3.63227
7.04549	5.41718		4.97315	5.41718		4.34483	5.41718
6.43912	4.76447		6.30159	4.76447		4.4489	4.76447
9.57162	5.25814		7.11249	5.25814		5.46597	5.25814
10.3727	3.72574		6.46418	3.72574		4.96116	3.72574
9.48228	3.37851		6.79155	3.37851		6.52748	3.37851
6.87885	3.34341		4.97223	3.34341		5.51979	3.34341
10.2009	3.48543		6.42206	3.48543		6.32643	3.48543
6.61058	6.51396		5.90183	6.51396		4.35896	6.51396
5.83036	4.36387		5.96832	4.36387		4.48929	4.36387
7.81256	5.81992		3.6893	5.81992		5.73931	5.81992
1.11103	4.5735		0.263034	4.5735		4.79077	4.5735
7.24451	3.7126		7.18229	3.7126		6.40156	3.7126
9.39917	4.30159		7.84887	4.30159		5.52325	4.30159
6.30086	4.12101		6.19121	4.12101		5.56955	4.12101
8.02641	3.42223		6.07981	3.42223		5.52231	3.42223
9.28859	2.22651		8.26491	2.22651		6.64904	2.22651
5.3147	3.51223		4.80271	3.51223		3.7301	3.51223
9.59913	3.35332		7.13761	3.35332		6.21237	3.35332
7.53854	4.52419		6.87246	4.52419		5.71644	4.52419
3.95699	4.99322		0.214125	4.99322		4.68594	4.99322
10.1927	3.56682		7.04821	3.56682		5.92742	3.56682
7.51846	3.68482		7.83851	3.68482		5.94977	3.68482
4.6605	4.37156		0.042644	4.37156		4.82018	4.37156
4.19456	4.25172		1.94486	4.25172		3.68032	4.25172
8.20843	3.32912		7.57901	3.32912		5.0691	3.32912
8.52931	4.18903		7.43671	4.18903		6.19987	4.18903
7.1811	5.01792		5.29646	5.01792		2.73552	5.01792
6.99413	4.79181		5.58586	4.79181		5.0955	4.79181
5.13258	4.92979		3.17473	4.92979		1.9855	4.92979
7.981	3.22805		7.28151	3.22805		6.32175	3.22805
6.27984	4.27426		5.48832	4.27426		4.25777	4.27426

## Sheet: Figure 7-Figure Supplement 1D
YAP Score	AJUBA Score			YAP	SAMD4A
6	8	Correlation p<0.0001		6	3	Correlation p<0.0001
8	6			8	8
9	9			9	9
6	9			6	9
3	9			3	3
2	3			2	4
8	4			8	8
0	3			0	0
4	12			4	6
9	9			9	8
12	12			12	6
6	9			6	4
4	4			4	1
12	3			12	6
1	8			1	3
2	9			2	2
3	0			3	6
12	9			12	9
12	12			12	8
3	4			3	0
4	4			4	2
1	8			1	0
0	9			0	0
4	9			4	6
8	9			8	2
2	3			2	1
6	6			6	6
12	12			12	12
3	8			3	3
3	12			3	4
1	6			1	4
3	9			3	12
4	4			4	8
8				8	12
2	4			2	12
6	9			6	3
6	12			6	3
3	9			3	2
3				3	4
8	9			8	12
3	4			3	3
2	3			2	3
4	9			4	4
6	3			6	2
0	4			0	0
4	6			4	6
2	6			2	4
6	4			6	3
2	4			2	3
4	9			4	3
3	6			3	2
0	2			0	0
2	6			2	3
4	6			4	6
2	3			2	2
2	2			2	2
2	3			2	1
0	0			0	0
8	9			8	4
4	6			4	3
1	4			1	0
4	3			4	2
4	6			4	2
2	2			2	4
1	3			1	9
8	4			8	1
3	4			3	2
4	6			4	2
4	4			4	3
3	3			3	2
3	3			3	8
2	0			2	2
9	1			9	0
6	3			6	3
3	2			3	0
6	3			6	4
4	4			4	9
3	9			3	12
4	12			4	8
6	6			6	9
9	4			9	12
8	6			8	12
3	3			3	2
9	9			9	4
2	2			2	2
2	4			2	6
12	9			12	12
12	6			12	12
3	2			3	0
3	2			3	1
2	4			2	2
6	9			6	9
12	9			12	1
12	6			12	6
12	6			12	8
4	4			4	0
3	6			3	4
0	0			0	0
6	6			6	2
8	6			8	4
9	3			9	0
6	3			6	6
12	4			12	4
0	0			0	0
4	3			4	8
6	9			6	9
6	9			6	12
2	3			2	1
8	4			8	4
9	2			9	2
0	2			0	3
4	2			4	2
6	6			6	2
1	3			1	6
4	12			4	6
12	6			12	3
0	0			0	0
2	0			2	0
6	2			6	6
3	2			3	3
1	2			1	0
4	6			4	1
4	6			4	2
2	4			2	2
1	1			1	2
2	2			2	0
3	3			3	4
12	12			12	8
0				0	2
6	6			6	3
3	4			3	0
2	9			2	0
0	3			0	9
3	6			3	9
0	1			0	6
0	2			0	0
6	2			6	3
3	3			3	6
0	3			0	4
4	6			4	9
2	2			2	2
3	2			3	0
0	1			0	6
0	1			0	0
1	6			1	3
0	12			0	4
4	6			4	6
6	9			6	0
8	8			8	2
6	9			6	6
0	6			0	0
0	9			0	0
0	1			0	4
0	0			0	4
6	2			6	2
9	2			9	2
4	1			4	4
12	6			12	8
3	8			3	3
3	8			3	0
2	6			2	0
6	9			6	6
3	6			3	4
3	3			3	3
3	3			3	1
2	6			2	6
2	3			2	6
12	9			12	12
6	9			6	9
9	6			9	8
2	4			2	2
9	6			9	8
3	4			3	6
12	6			12	9
3	2			3	8
12	6			12	9
0	2			0	0
0	1			0	0
4	8			4	6
8	8			8	4
6	9			6	2
12	12			12	3
1	2			1	0
6	12			6	12
0	4			0	9
3	4			3	6
0	6			0	0
0	3			0	0
9	9			9	6
9	12			9	4
8	6			8	6
4	4			4	9
1	0			1	12
2	0			2	8
3	3			3	0
2	6			2	8
3	4			3	9
0	3			0	0
6	6			6	9
6	6			6	8
9	9			9	3
9	12			9	6
12	9			12	2
12	12			12	9
3	1			3	6
0	1			0	6
6	4			6	6
12	3			12	8
12	6			12	6
12	4			12	9
8	4			8	8
8	4			8	9
0	4			0	2
0	3			0	0
2	4			2	0
3	6			3	6
6	9			6	2
12	12			12	3
6	9			6	0
4	3			4	8
9	4			9	3
9	12			9	6
3	6			3	6
9	9			9	6
12	12			12	6
12	12			12	9
3				3	8
3	4			3	6
4	2			4	8
6	3			6	4
3	6			3	3
6	6			6	2
3	4			3	1
4	6			4	0
1	2			1	4
1	4			1	12
3	6			3	6
4	9			4	3
3	9			3	4
0	9			0	3
4	4			4	2
12	12			12	9
12	6			12	3
6	2			6	2
12	6			12	4
6	4			6	9
12	4			12	6
6	3			6	8
0	2			0	8
2	3			2	4
9	6			9	8
3	8			3	0
0	4			0	6
0	6			0	6
12	8			12	2
6	6			6	0
4	4			4	6
2	6			2	3
6	6			6	4
4	9			4	4
3	4			3	4
12	6			12	6
12	9			12	3
9	4			9	1
9	3			9	0
6	6			6	4
3	0			3	3
2	3			2	0
0	2			0	0
3	2			3	4
1	4			1	0
3	6			3	8
3	4			3	6
2	6			2	3
6	12			6	4
8	12			8	4
6	9			6	3
3	3			3	6
3	6			3	0
12	8			12	4
12	2			12	6
3	1			3	8
2	1			2	6
4	4			4	0
1	1			1	0
2	6			2	4
3	8			3	3
4	3			4	4
4	4			4	3
6	9			6	8
6	4			6	4
1	4			1	6
6	12			6	8
4	9			4	6
