# Supplementary material for: YAP/TAZ enhances P-body formation to promote tumorigenesis
Source: eLife. 2024 Jul 24;12:RP88573. doi: 10.7554/eLife.88573 (PMC11268890; doi:10.7554/eLife.88573)
Supplement: Figure 7—figure supplement 2—source data 1. [file elife-88573-fig7-figsupp2-data1.xlsx]

## Sheet: Figure 7-Figure Supplement 2A
DDX6 Gene Effect (Chronos) CRISPR (DepMap 22Q1 Public+Score	DDX6 Gene Effect (Chronos) CRISPR (DepMap 22Q1 Public+Score		LSM14A Gene Effect (Chronos) CRISPR (DepMap 22Q1 Public+Score	LSM14A Gene Effect (Chronos) CRISPR (DepMap 22Q1 Public+Score		EDC4 Gene Effect (Chronos) CRISPR (DepMap 22Q1 Public+Score	EDC4 Gene Effect (Chronos) CRISPR (DepMap 22Q1 Public+Score		DDX6 Gene Effect (Chronos) CRISPR (DepMap 22Q1 Public+Score	DDX6 Gene Effect (Chronos) CRISPR (DepMap 22Q1 Public+Score		LSM14A Gene Effect (Chronos) CRISPR (DepMap 22Q1 Public+Score	LSM14A Gene Effect (Chronos) CRISPR (DepMap 22Q1 Public+Score		EDC4 Gene Effect (Chronos) CRISPR (DepMap 22Q1 Public+Score	EDC4 Gene Effect (Chronos) CRISPR (DepMap 22Q1 Public+Score
-0.9116	-0.2693	r = 0.186	-0.7555	-0.2693	r = 0.141	-0.28978	-0.2693	r = 0.073	-0.9116	-0.28889	r = 0.178	-0.7555	-0.28889	r = 0.109	-0.28978	-0.28889	r = 0.150
-0.69149	0.021396	P=4.92E-7	-0.28197	0.021396	P=9.83E-6	-0.49413	0.021396	P=0.0165	-0.69149	-0.11907	P=4.92E-9	-0.28197	-0.11907	P=3.37E-4	-0.49413	-0.11907	P=7.90E-7
-0.53146	-0.08813		-0.35297	-0.08813		-0.56274	-0.08813		-0.53146	-0.34631		-0.35297	-0.34631		-0.56274	-0.34631
-0.52416	-0.09305		-0.41935	-0.09305		-0.24892	-0.09305		-0.52416	-0.31923		-0.41935	-0.31923		-0.24892	-0.31923
-1.07977	-0.26615		-0.36388	-0.26615		-0.25418	-0.26615		-1.07977	-0.3203		-0.36388	-0.3203		-0.25418	-0.3203
-1.11136	-0.50869		-0.38978	-0.50869		-0.08571	-0.50869		-1.11136	-0.23307		-0.38978	-0.23307		-0.08571	-0.23307
-0.83576	-0.14412		-0.64236	-0.14412		-0.54608	-0.14412		-0.83576	-0.13752		-0.64236	-0.13752		-0.54608	-0.13752
-0.76863	-0.15386		-0.37541	-0.15386		-0.29138	-0.15386		-0.76863	-0.26611		-0.37541	-0.26611		-0.29138	-0.26611
-0.7774	-0.09447		-0.02308	-0.09447		-0.10488	-0.09447		-0.7774	-0.24123		-0.02308	-0.24123		-0.10488	-0.24123
-0.82599	-0.15975		-0.44478	-0.15975		-0.2155	-0.15975		-0.82599	-0.18744		-0.44478	-0.18744		-0.2155	-0.18744
-0.97436	-0.29904		-0.25771	-0.29904		-0.33271	-0.29904		-0.97436	-0.46846		-0.25771	-0.46846		-0.33271	-0.46846
-0.60005	-0.43306		-0.38098	-0.43306		-0.50054	-0.43306		-0.60005	-0.35865		-0.38098	-0.35865		-0.50054	-0.35865
-0.63643	0.003345		-0.53984	0.003345		-0.04337	0.003345		-0.63643	-0.25787		-0.53984	-0.25787		-0.04337	-0.25787
-1.45701	-0.3602		-0.33033	-0.3602		-0.57513	-0.3602		-1.45701	-0.77713		-0.33033	-0.77713		-0.57513	-0.77713
-0.57752	-0.0974		-0.42055	-0.0974		-0.15163	-0.0974		-0.57752	-0.16479		-0.42055	-0.16479		-0.15163	-0.16479
-0.87145	-0.41616		-0.31076	-0.41616		-0.32173	-0.41616		-0.87145	-0.16739		-0.31076	-0.16739		-0.32173	-0.16739
-1.341	0.123914		-0.38286	0.123914		-0.14035	0.123914		-1.341	-0.17624		-0.38286	-0.17624		-0.14035	-0.17624
-0.54429	-0.45216		-0.4418	-0.45216		-0.26555	-0.45216		-0.54429	-0.23341		-0.4418	-0.23341		-0.26555	-0.23341
-1.02887	-0.12277		-0.47166	-0.12277		-0.17761	-0.12277		-1.02887	-0.3422		-0.47166	-0.3422		-0.17761	-0.3422
-0.6388	-0.42946		-0.45932	-0.42946		-0.33474	-0.42946		-0.6388	-0.22881		-0.45932	-0.22881		-0.33474	-0.22881
-0.77969	-0.62954		-0.53551	-0.62954		-0.1839	-0.62954		-0.77969	-0.54729		-0.53551	-0.54729		-0.1839	-0.54729
-0.68746	-0.13163		-0.4401	-0.13163		-0.3404	-0.13163		-0.68746	-0.5253		-0.4401	-0.5253		-0.3404	-0.5253
-1.30084	-0.4695		-0.53919	-0.4695		-0.19406	-0.4695		-1.30084	-0.34781		-0.53919	-0.34781		-0.19406	-0.34781
-0.80283	0.138514		-0.2522	0.138514		-0.48833	0.138514		-0.80283	-0.18724		-0.2522	-0.18724		-0.48833	-0.18724
-0.89636	0.048588		-0.57998	0.048588		-0.65863	0.048588		-0.89636	-0.11481		-0.57998	-0.11481		-0.65863	-0.11481
-0.82305	-0.11016		-0.42567	-0.11016		-0.37256	-0.11016		-0.82305	-0.25108		-0.42567	-0.25108		-0.37256	-0.25108
-0.85388	-0.07145		-0.27103	-0.07145		-0.32002	-0.07145		-0.85388	-0.37249		-0.27103	-0.37249		-0.32002	-0.37249
-0.80018	-0.5959		-0.44527	-0.5959		-0.39641	-0.5959		-0.80018	-0.22003		-0.44527	-0.22003		-0.39641	-0.22003
-0.77061	-0.00526		-0.21677	-0.00526		0.00342	-0.00526		-0.77061	-0.20117		-0.21677	-0.20117		0.00342	-0.20117
-0.80276	-0.19291		-0.34213	-0.19291		-0.19329	-0.19291		-0.80276	-0.34481		-0.34213	-0.34481		-0.19329	-0.34481
-0.75221	0.056513		-0.21267	0.056513		-0.16346	0.056513		-0.75221	-0.24447		-0.21267	-0.24447		-0.16346	-0.24447
-0.68758	0.058557		-0.59038	0.058557		-1.11239	0.058557		-0.68758	-0.28017		-0.59038	-0.28017		-1.11239	-0.28017
-0.62147	0.030957		-0.45981	0.030957		-0.33695	0.030957		-0.62147	0.034366		-0.45981	0.034366		-0.33695	0.034366
-0.46224	-0.13425		-0.3429	-0.13425		-0.18413	-0.13425		-0.46224	-0.25984		-0.3429	-0.25984		-0.18413	-0.25984
-0.78067	0.131781		-0.12915	0.131781		-0.78359	0.131781		-0.78067	-0.06576		-0.12915	-0.06576		-0.78359	-0.06576
-0.98217	-0.40829		-0.43746	-0.40829		-0.421	-0.40829		-0.98217	-0.29815		-0.43746	-0.29815		-0.421	-0.29815
-0.81295	-0.5933		-0.46602	-0.5933		-0.39028	-0.5933		-0.81295	-0.37849		-0.46602	-0.37849		-0.39028	-0.37849
-0.76988	0.17768		-0.54604	0.17768		-0.38615	0.17768		-0.76988	-0.36239		-0.54604	-0.36239		-0.38615	-0.36239
-1.39105	0.043444		-0.4396	0.043444		-0.82021	0.043444		-1.39105	-0.09301		-0.4396	-0.09301		-0.82021	-0.09301
-0.92786	-0.19687		-0.61977	-0.19687		-0.47607	-0.19687		-0.92786	-0.36339		-0.61977	-0.36339		-0.47607	-0.36339
-0.60768	-0.05682		0.000151	-0.05682		-0.49469	-0.05682		-0.60768	-0.19971		0.000151	-0.19971		-0.49469	-0.19971
-0.24703	0.000839		-0.51323	0.000839		-0.22439	0.000839		-0.24703	-0.15232		-0.51323	-0.15232		-0.22439	-0.15232
-1.19528	-0.16333		-0.25314	-0.16333		-0.39795	-0.16333		-1.19528	-0.18691		-0.25314	-0.18691		-0.39795	-0.18691
-1.35229	-0.68672		-0.37208	-0.68672		-0.53717	-0.68672		-1.35229	-0.32993		-0.37208	-0.32993		-0.53717	-0.32993
-1.15802	-0.00643		-0.7411	-0.00643		-0.68762	-0.00643		-1.15802	-0.17423		-0.7411	-0.17423		-0.68762	-0.17423
-0.65076	-0.80841		-0.54665	-0.80841		-0.2965	-0.80841		-0.65076	-0.2546		-0.54665	-0.2546		-0.2965	-0.2546
-0.99179	-0.00124		-0.43512	-0.00124		-0.42577	-0.00124		-0.99179	-0.22017		-0.43512	-0.22017		-0.42577	-0.22017
-1.61406	-0.3945		-0.75733	-0.3945		-0.45986	-0.3945		-1.61406	-0.21827		-0.75733	-0.21827		-0.45986	-0.21827
-0.56538	0.083205		-0.03528	0.083205		-0.52774	0.083205		-0.56538	-0.17015		-0.03528	-0.17015		-0.52774	-0.17015
-1.1374	-0.49312		-0.45746	-0.49312		-0.61448	-0.49312		-1.1374	-0.44266		-0.45746	-0.44266		-0.61448	-0.44266
-0.98373	-0.03949		-0.49803	-0.03949		-0.1171	-0.03949		-0.98373	-0.23844		-0.49803	-0.23844		-0.1171	-0.23844
-0.74093	-0.12304		-0.52225	-0.12304		-0.68274	-0.12304		-0.74093	-0.3617		-0.52225	-0.3617		-0.68274	-0.3617
-0.21947	-0.12696		-0.52735	-0.12696		-0.09154	-0.12696		-0.21947	-0.16671		-0.52735	-0.16671		-0.09154	-0.16671
-0.73552	-0.41069		-0.39312	-0.41069		-0.40283	-0.41069		-0.73552	-0.37487		-0.39312	-0.37487		-0.40283	-0.37487
-0.4943	-0.18985		-0.22151	-0.18985		-0.31946	-0.18985		-0.4943	-0.19718		-0.22151	-0.19718		-0.31946	-0.19718
-1.13217	-0.00225		-0.28588	-0.00225		-0.39569	-0.00225		-1.13217	-0.27893		-0.28588	-0.27893		-0.39569	-0.27893
-1.54483	0.083426		-0.64963	0.083426		-0.4387	0.083426		-1.54483	-0.30061		-0.64963	-0.30061		-0.4387	-0.30061
-1.10164	-0.57511		-0.55291	-0.57511		-0.37549	-0.57511		-1.10164	-0.25158		-0.55291	-0.25158		-0.37549	-0.25158
-1.33801	0.130971		-0.40972	0.130971		-0.48745	0.130971		-1.33801	-0.18778		-0.40972	-0.18778		-0.48745	-0.18778
-0.7975	0.021313		-0.23389	0.021313		0.008139	0.021313		-0.7975	-0.25629		-0.23389	-0.25629		0.008139	-0.25629
-1.353	-0.20293		-0.51059	-0.20293		-0.5294	-0.20293		-1.353	-0.49238		-0.51059	-0.49238		-0.5294	-0.49238
-0.76363	-0.03733		-0.65079	-0.03733		0.012142	-0.03733		-0.76363	-0.28194		-0.65079	-0.28194		0.012142	-0.28194
-1.11581	0.108621		-0.31576	0.108621		-0.48124	0.108621		-1.11581	-0.16024		-0.31576	-0.16024		-0.48124	-0.16024
-0.76917	-0.45911		-0.44843	-0.45911		-0.32286	-0.45911		-0.76917	-0.22235		-0.44843	-0.22235		-0.32286	-0.22235
-0.92303	-0.16642		-0.68213	-0.16642		-0.36345	-0.16642		-0.92303	-0.05909		-0.68213	-0.05909		-0.36345	-0.05909
-0.84068	-0.10353		-0.54961	-0.10353		-0.14548	-0.10353		-0.84068	-0.3881		-0.54961	-0.3881		-0.14548	-0.3881
-0.89582	0.046107		-0.47092	0.046107		-0.40156	0.046107		-0.89582	-0.4485		-0.47092	-0.4485		-0.40156	-0.4485
-0.95873	-0.60262		-0.30777	-0.60262		-0.4011	-0.60262		-0.95873	-0.14984		-0.30777	-0.14984		-0.4011	-0.14984
-1.13809	-0.20846		-0.2549	-0.20846		-0.76294	-0.20846		-1.13809	-0.05785		-0.2549	-0.05785		-0.76294	-0.05785
-1.15912	-0.18829		-0.35855	-0.18829		-0.55107	-0.18829		-1.15912	-0.30524		-0.35855	-0.30524		-0.55107	-0.30524
-0.97452	-0.08807		-0.59509	-0.08807		-0.74827	-0.08807		-0.97452	-0.65941		-0.59509	-0.65941		-0.74827	-0.65941
-0.61032	-0.18228		-0.45059	-0.18228		-0.27658	-0.18228		-0.61032	-0.38291		-0.45059	-0.38291		-0.27658	-0.38291
-1.05995	-0.67153		-0.58665	-0.67153		-0.15125	-0.67153		-1.05995	-0.51911		-0.58665	-0.51911		-0.15125	-0.51911
-0.50925	-0.41891		-0.46147	-0.41891		-0.39216	-0.41891		-0.50925	-0.13705		-0.46147	-0.13705		-0.39216	-0.13705
-1.6294	-0.37861		-0.60347	-0.37861		-0.70994	-0.37861		-1.6294	-0.50201		-0.60347	-0.50201		-0.70994	-0.50201
-0.50415	-0.1585		-0.2944	-0.1585		-0.3757	-0.1585		-0.50415	-0.82626		-0.2944	-0.82626		-0.3757	-0.82626
-0.97248	0.107872		-0.20796	0.107872		-0.55421	0.107872		-0.97248	-0.20374		-0.20796	-0.20374		-0.55421	-0.20374
-1.3853	0.008493		-0.43322	0.008493		-0.61111	0.008493		-1.3853	-0.27195		-0.43322	-0.27195		-0.61111	-0.27195
-0.82903	-0.10266		-0.42997	-0.10266		-0.37495	-0.10266		-0.82903	-0.18374		-0.42997	-0.18374		-0.37495	-0.18374
-0.72845	0.002578		-0.25316	0.002578		-0.16146	0.002578		-0.72845	-0.44897		-0.25316	-0.44897		-0.16146	-0.44897
-0.88846	-0.18216		-0.38438	-0.18216		-0.27309	-0.18216		-0.88846	-0.17638		-0.38438	-0.17638		-0.27309	-0.17638
-0.5884	-0.1628		-0.48646	-0.1628		-0.69334	-0.1628		-0.5884	-0.15908		-0.48646	-0.15908		-0.69334	-0.15908
-1.19504	-0.20298		-0.35073	-0.20298		-0.46739	-0.20298		-1.19504	-0.33311		-0.35073	-0.33311		-0.46739	-0.33311
-0.18747	-0.03407		-0.54703	-0.03407		0.220874	-0.03407		-0.18747	0.00527		-0.54703	0.00527		0.220874	0.00527
-0.87902	-0.26109		-0.63269	-0.26109		-0.29043	-0.26109		-0.87902	-0.34734		-0.63269	-0.34734		-0.29043	-0.34734
-0.91763	-0.6595		-0.41261	-0.6595		-0.79236	-0.6595		-0.91763	-0.11675		-0.41261	-0.11675		-0.79236	-0.11675
-1.08127	-0.08546		-0.34895	-0.08546		-0.67961	-0.08546		-1.08127	-0.32342		-0.34895	-0.32342		-0.67961	-0.32342
-1.45983	-0.16069		-0.28171	-0.16069		-0.27282	-0.16069		-1.45983	-0.24852		-0.28171	-0.24852		-0.27282	-0.24852
-0.41315	-0.50426		-0.5901	-0.50426		-0.29251	-0.50426		-0.41315	-0.14156		-0.5901	-0.14156		-0.29251	-0.14156
-0.39593	-0.11973		-0.61695	-0.11973		-0.21671	-0.11973		-0.39593	-0.28728		-0.61695	-0.28728		-0.21671	-0.28728
-1.01162	-0.5115		-0.33055	-0.5115		-0.11621	-0.5115		-1.01162	-0.08565		-0.33055	-0.08565		-0.11621	-0.08565
-0.53696	-0.14924		-0.46992	-0.14924		-0.29208	-0.14924		-0.53696	-0.21915		-0.46992	-0.21915		-0.29208	-0.21915
-1.16464	0.103439		-0.39322	0.103439		-0.20249	0.103439		-1.16464	-0.24106		-0.39322	-0.24106		-0.20249	-0.24106
-0.53362	0.039004		-0.04459	0.039004		-0.26072	0.039004		-0.53362	-0.11952		-0.04459	-0.11952		-0.26072	-0.11952
-0.71978	-0.02996		-0.53618	-0.02996		-0.2048	-0.02996		-0.71978	-0.36998		-0.53618	-0.36998		-0.2048	-0.36998
-0.36017	-0.18764		-0.55023	-0.18764		-0.69559	-0.18764		-0.36017	-0.04697		-0.55023	-0.04697		-0.69559	-0.04697
-1.25883	-0.43292		-0.90657	-0.43292		-0.92461	-0.43292		-1.25883	-0.30025		-0.90657	-0.30025		-0.92461	-0.30025
-0.8895	-0.93755		-0.62689	-0.93755		-0.24692	-0.93755		-0.8895	-0.40077		-0.62689	-0.40077		-0.24692	-0.40077
-0.78741	0.050671		-0.37798	0.050671		-0.48965	0.050671		-0.78741	-0.28388		-0.37798	-0.28388		-0.48965	-0.28388
-0.63001	-0.47142		-0.66995	-0.47142		-0.33729	-0.47142		-0.63001	-0.4157		-0.66995	-0.4157		-0.33729	-0.4157
-0.98701	-0.02612		-0.25601	-0.02612		-0.12879	-0.02612		-0.98701	-0.31211		-0.25601	-0.31211		-0.12879	-0.31211
-1.2341	-0.06634		-0.36295	-0.06634		-0.3155	-0.06634		-1.2341	-0.25381		-0.36295	-0.25381		-0.3155	-0.25381
-1.29102	0.079535		-0.37943	0.079535		-0.31627	0.079535		-1.29102	-0.11142		-0.37943	-0.11142		-0.31627	-0.11142
-0.77929	-0.23425		-0.37641	-0.23425		-0.22336	-0.23425		-0.77929	-0.27088		-0.37641	-0.27088		-0.22336	-0.27088
-0.95766	-0.43257		-0.5552	-0.43257		-0.54467	-0.43257		-0.95766	-0.29142		-0.5552	-0.29142		-0.54467	-0.29142
-0.82764	-0.08821		-0.29918	-0.08821		-0.0511	-0.08821		-0.82764	-0.2779		-0.29918	-0.2779		-0.0511	-0.2779
-1.07049	-0.38017		-0.23976	-0.38017		-0.44093	-0.38017		-1.07049	-0.34971		-0.23976	-0.34971		-0.44093	-0.34971
-0.65092	0.085487		-0.5453	0.085487		-0.36017	0.085487		-0.65092	-0.33927		-0.5453	-0.33927		-0.36017	-0.33927
-1.0437	0.056208		-0.16117	0.056208		-0.40567	0.056208		-1.0437	0.03598		-0.16117	0.03598		-0.40567	0.03598
-1.23462	-0.0364		-0.46522	-0.0364		-0.24804	-0.0364		-1.23462	-0.14599		-0.46522	-0.14599		-0.24804	-0.14599
-0.83723	-0.54564		-0.51461	-0.54564		-0.32	-0.54564		-0.83723	-0.23554		-0.51461	-0.23554		-0.32	-0.23554
-0.85553	0.306031		-0.94928	0.306031		-0.45761	0.306031		-0.85553	-0.19187		-0.94928	-0.19187		-0.45761	-0.19187
-0.96363	0.227528		-0.45233	0.227528		-0.16586	0.227528		-0.96363	-0.27301		-0.45233	-0.27301		-0.16586	-0.27301
-0.72006	0.080311		-0.11886	0.080311		-0.26836	0.080311		-0.72006	-0.17675		-0.11886	-0.17675		-0.26836	-0.17675
-0.64582	-0.22052		-0.50962	-0.22052		-0.76687	-0.22052		-0.64582	-0.58958		-0.50962	-0.58958		-0.76687	-0.58958
-1.25751	-0.4259		-0.42435	-0.4259		-0.44193	-0.4259		-1.25751	-0.25604		-0.42435	-0.25604		-0.44193	-0.25604
-1.30653	-0.13926		-0.49235	-0.13926		-0.76174	-0.13926		-1.30653	-0.31463		-0.49235	-0.31463		-0.76174	-0.31463
-0.72228	-0.63999		-0.32449	-0.63999		-0.14529	-0.63999		-0.72228	-0.33482		-0.32449	-0.33482		-0.14529	-0.33482
-0.54252	-0.49563		-0.67034	-0.49563		-0.34827	-0.49563		-0.54252	-0.2765		-0.67034	-0.2765		-0.34827	-0.2765
-0.76702	-0.50493		-0.25761	-0.50493		-0.20419	-0.50493		-0.76702	-0.40158		-0.25761	-0.40158		-0.20419	-0.40158
-0.68799	-0.78391		-0.44318	-0.78391		-0.32395	-0.78391		-0.68799	-0.54219		-0.44318	-0.54219		-0.32395	-0.54219
-0.81836	-0.1071		-0.48921	-0.1071		-0.35696	-0.1071		-0.81836	-0.35799		-0.48921	-0.35799		-0.35696	-0.35799
-0.96065	-0.46269		-0.38478	-0.46269		-0.24976	-0.46269		-0.96065	-0.21639		-0.38478	-0.21639		-0.24976	-0.21639
-0.50979	0.042736		-0.25198	0.042736		-0.38532	0.042736		-0.50979	-0.17319		-0.25198	-0.17319		-0.38532	-0.17319
-1.02674	-0.4408		-0.66759	-0.4408		-0.53876	-0.4408		-1.02674	-0.29205		-0.66759	-0.29205		-0.53876	-0.29205
-1.21712	-0.283		-0.26419	-0.283		-0.23357	-0.283		-1.21712	-0.54655		-0.26419	-0.54655		-0.23357	-0.54655
-0.9081	-0.04338		-0.37234	-0.04338		-0.20837	-0.04338		-0.9081	-0.37927		-0.37234	-0.37927		-0.20837	-0.37927
-0.51909	-0.1712		-0.22988	-0.1712		-0.40569	-0.1712		-0.51909	-0.31264		-0.22988	-0.31264		-0.40569	-0.31264
-0.85902	0.024594		-0.2361	0.024594		-0.27281	0.024594		-0.85902	-0.19244		-0.2361	-0.19244		-0.27281	-0.19244
-0.95501	-0.30038		-0.35772	-0.30038		-0.47001	-0.30038		-0.95501	-0.58722		-0.35772	-0.58722		-0.47001	-0.58722
-1.0674	-0.72402		-0.25511	-0.72402		-0.21338	-0.72402		-1.0674	-0.26539		-0.25511	-0.26539		-0.21338	-0.26539
-1.1149	-0.01548		-0.27473	-0.01548		-0.22103	-0.01548		-1.1149	-0.34272		-0.27473	-0.34272		-0.22103	-0.34272
-0.70472	-0.19709		-0.45731	-0.19709		-0.24165	-0.19709		-0.70472	-0.32841		-0.45731	-0.32841		-0.24165	-0.32841
-1.27718	-0.64403		-0.46556	-0.64403		-0.55014	-0.64403		-1.27718	-0.33676		-0.46556	-0.33676		-0.55014	-0.33676
-1.04827	-0.42075		-0.46887	-0.42075		-0.81358	-0.42075		-1.04827	-0.22067		-0.46887	-0.22067		-0.81358	-0.22067
-1.10875	-0.59436		-0.21037	-0.59436		-0.36263	-0.59436		-1.10875	-0.45287		-0.21037	-0.45287		-0.36263	-0.45287
-1.06654	-0.17704		-0.44406	-0.17704		-0.49692	-0.17704		-1.06654	-0.1931		-0.44406	-0.1931		-0.49692	-0.1931
-1.2106	-0.55233		-0.42229	-0.55233		-0.65362	-0.55233		-1.2106	-0.18761		-0.42229	-0.18761		-0.65362	-0.18761
-1.15516	-0.36286		-0.56582	-0.36286		-0.27417	-0.36286		-1.15516	-0.15678		-0.56582	-0.15678		-0.27417	-0.15678
-1.37623	-0.56261		-0.56988	-0.56261		-0.9543	-0.56261		-1.37623	-0.22179		-0.56988	-0.22179		-0.9543	-0.22179
-0.90122	-0.14783		-0.25106	-0.14783		-0.3693	-0.14783		-0.90122	-0.41608		-0.25106	-0.41608		-0.3693	-0.41608
-0.65055	-0.0559		-0.45542	-0.0559		-0.7422	-0.0559		-0.65055	-0.36279		-0.45542	-0.36279		-0.7422	-0.36279
-1.13982	-0.40171		-0.32807	-0.40171		-0.39787	-0.40171		-1.13982	-0.34029		-0.32807	-0.34029		-0.39787	-0.34029
-0.73853	-0.18745		-0.46037	-0.18745		-0.31363	-0.18745		-0.73853	-0.23485		-0.46037	-0.23485		-0.31363	-0.23485
-0.65729	-0.09981		-0.60126	-0.09981		-0.3118	-0.09981		-0.65729	-0.09526		-0.60126	-0.09526		-0.3118	-0.09526
-0.93814	-0.19626		-0.26057	-0.19626		-0.2293	-0.19626		-0.93814	-0.10341		-0.26057	-0.10341		-0.2293	-0.10341
-0.96517	-0.14908		-0.52094	-0.14908		-0.22612	-0.14908		-0.96517	-0.40828		-0.52094	-0.40828		-0.22612	-0.40828
-0.44323	-0.42283		-0.46072	-0.42283		-0.25529	-0.42283		-0.44323	-0.45583		-0.46072	-0.45583		-0.25529	-0.45583
-1.0605	-0.53554		-0.1223	-0.53554		-0.25296	-0.53554		-1.0605	-0.42547		-0.1223	-0.42547		-0.25296	-0.42547
-1.03204	0.161185		-0.1367	0.161185		-0.54216	0.161185		-1.03204	-0.19923		-0.1367	-0.19923		-0.54216	-0.19923
-0.5026	-0.09041		-0.48654	-0.09041		0.051337	-0.09041		-0.5026	-0.11503		-0.48654	-0.11503		0.051337	-0.11503
-0.83394	-0.13107		-0.44395	-0.13107		-0.34148	-0.13107		-0.83394	-0.18568		-0.44395	-0.18568		-0.34148	-0.18568
-1.1256	-0.57367		-0.58662	-0.57367		-0.34309	-0.57367		-1.1256	-0.25191		-0.58662	-0.25191		-0.34309	-0.25191
-0.88312	-0.08762		-0.40347	-0.08762		-0.48659	-0.08762		-0.88312	-0.1531		-0.40347	-0.1531		-0.48659	-0.1531
-1.00504	0.078991		-0.38415	0.078991		-0.2958	0.078991		-1.00504	-0.2263		-0.38415	-0.2263		-0.2958	-0.2263
-0.87811	-0.09026		-0.2634	-0.09026		-0.54896	-0.09026		-0.87811	-0.29127		-0.2634	-0.29127		-0.54896	-0.29127
-0.75492	-0.09413		-0.43084	-0.09413		-0.12099	-0.09413		-0.75492	-0.16771		-0.43084	-0.16771		-0.12099	-0.16771
-1.32611	-0.93485		-0.46423	-0.93485		-0.44112	-0.93485		-1.32611	-0.54227		-0.46423	-0.54227		-0.44112	-0.54227
-0.79605	-0.58665		-0.41608	-0.58665		-0.24025	-0.58665		-0.79605	-0.08507		-0.41608	-0.08507		-0.24025	-0.08507
-0.92246	0.088856		-0.32615	0.088856		-0.01781	0.088856		-0.92246	-0.3816		-0.32615	-0.3816		-0.01781	-0.3816
-0.87951	-0.25983		-0.33625	-0.25983		-0.33006	-0.25983		-0.87951	-0.31052		-0.33625	-0.31052		-0.33006	-0.31052
-0.75661	-0.23706		-0.35244	-0.23706		-0.2966	-0.23706		-0.75661	-0.40168		-0.35244	-0.40168		-0.2966	-0.40168
-1.33863	-0.93996		-0.44886	-0.93996		-0.52471	-0.93996		-1.33863	-0.41045		-0.44886	-0.41045		-0.52471	-0.41045
-1.02029	-0.16985		-0.3334	-0.16985		-0.20824	-0.16985		-1.02029	-0.24109		-0.3334	-0.24109		-0.20824	-0.24109
-0.5227	0.145716		-0.64716	0.145716		-0.28554	0.145716		-0.5227	-0.0833		-0.64716	-0.0833		-0.28554	-0.0833
-0.55777	-0.06278		-0.45853	-0.06278		-0.25761	-0.06278		-0.55777	-0.12092		-0.45853	-0.12092		-0.25761	-0.12092
-0.83614	-0.08759		-0.35048	-0.08759		-0.35726	-0.08759		-0.83614	-0.18911		-0.35048	-0.18911		-0.35726	-0.18911
-0.77487	-0.26034		-0.19268	-0.26034		-0.46828	-0.26034		-0.77487	-0.30581		-0.19268	-0.30581		-0.46828	-0.30581
-1.41278	-0.41171		-0.24839	-0.41171		-0.81804	-0.41171		-1.41278	-0.45394		-0.24839	-0.45394		-0.81804	-0.45394
-1.4968	-0.17909		-0.12352	-0.17909		-0.66093	-0.17909		-1.4968	-0.29941		-0.12352	-0.29941		-0.66093	-0.29941
-0.46564	-0.26369		-0.17943	-0.26369		-0.07863	-0.26369		-0.46564	-0.2508		-0.17943	-0.2508		-0.07863	-0.2508
-0.77813	-0.11171		-0.13029	-0.11171		-0.40101	-0.11171		-0.77813	-0.13262		-0.13029	-0.13262		-0.40101	-0.13262
-1.41215	-0.27716		-0.32162	-0.27716		-0.63447	-0.27716		-1.41215	-0.24864		-0.32162	-0.24864		-0.63447	-0.24864
-0.87869	-0.13376		-0.47661	-0.13376		-0.13766	-0.13376		-0.87869	-0.29986		-0.47661	-0.29986		-0.13766	-0.29986
-0.82111	0.062844		-0.47694	0.062844		-0.14315	0.062844		-0.82111	-0.26352		-0.47694	-0.26352		-0.14315	-0.26352
-0.87118	-0.30398		-0.52017	-0.30398		-0.48046	-0.30398		-0.87118	-0.31413		-0.52017	-0.31413		-0.48046	-0.31413
-0.74462	0.083348		-0.28848	0.083348		-0.44882	0.083348		-0.74462	-0.16305		-0.28848	-0.16305		-0.44882	-0.16305
-1.08297	0.103067		-0.48684	0.103067		-0.56917	0.103067		-1.08297	-0.24354		-0.48684	-0.24354		-0.56917	-0.24354
-0.70922	-0.23616		-0.1884	-0.23616		-0.11216	-0.23616		-0.70922	-0.54453		-0.1884	-0.54453		-0.11216	-0.54453
-0.97935	-0.1819		-0.37792	-0.1819		-0.43926	-0.1819		-0.97935	-0.42461		-0.37792	-0.42461		-0.43926	-0.42461
-0.58667	-0.25231		-0.17761	-0.25231		-0.59122	-0.25231		-0.58667	-0.08768		-0.17761	-0.08768		-0.59122	-0.08768
-0.78829	0.146838		-0.53371	0.146838		-0.12176	0.146838		-0.78829	-0.05001		-0.53371	-0.05001		-0.12176	-0.05001
-0.63105	-0.19357		-0.42285	-0.19357		-0.32716	-0.19357		-0.63105	-0.24635		-0.42285	-0.24635		-0.32716	-0.24635
-1.09674	-0.34951		-0.31881	-0.34951		-0.50618	-0.34951		-1.09674	-0.2296		-0.31881	-0.2296		-0.50618	-0.2296
-0.68215	-0.38389		-0.42986	-0.38389		-0.27708	-0.38389		-0.68215	-0.2622		-0.42986	-0.2622		-0.27708	-0.2622
-0.94824	-0.13394		-0.29764	-0.13394		-0.34493	-0.13394		-0.94824	-0.15058		-0.29764	-0.15058		-0.34493	-0.15058
-0.6365	-0.38058		-0.87521	-0.38058		-0.30621	-0.38058		-0.6365	-0.32789		-0.87521	-0.32789		-0.30621	-0.32789
-0.82399	-0.10848		-0.34522	-0.10848		-0.53717	-0.10848		-0.82399	-0.23997		-0.34522	-0.23997		-0.53717	-0.23997
-0.82602	-0.53815		-0.34456	-0.53815		-0.06359	-0.53815		-0.82602	-0.22424		-0.34456	-0.22424		-0.06359	-0.22424
-0.66404	-0.09835		-0.13763	-0.09835		-0.13638	-0.09835		-0.66404	-0.12345		-0.13763	-0.12345		-0.13638	-0.12345
-0.62666	-0.5795		-0.3392	-0.5795		-0.42977	-0.5795		-0.62666	-0.3688		-0.3392	-0.3688		-0.42977	-0.3688
-0.43861	-0.1239		-0.25049	-0.1239		-0.34763	-0.1239		-0.43861	-0.0698		-0.25049	-0.0698		-0.34763	-0.0698
-0.77061	-0.23939		-0.3664	-0.23939		-0.14087	-0.23939		-0.77061	-0.32972		-0.3664	-0.32972		-0.14087	-0.32972
-0.72088	-0.09123		-0.38529	-0.09123		-0.52901	-0.09123		-0.72088	-0.53842		-0.38529	-0.53842		-0.52901	-0.53842
-0.86746	-0.13507		-0.47166	-0.13507		-0.37958	-0.13507		-0.86746	-0.11959		-0.47166	-0.11959		-0.37958	-0.11959
-0.45869	0.041027		-0.15549	0.041027		-0.30324	0.041027		-0.45869	-0.12793		-0.15549	-0.12793		-0.30324	-0.12793
-1.09085	-0.41812		-0.24911	-0.41812		-0.21756	-0.41812		-1.09085	-0.3891		-0.24911	-0.3891		-0.21756	-0.3891
-1.18725	-0.20616		-0.33588	-0.20616		-0.27783	-0.20616		-1.18725	-0.25775		-0.33588	-0.25775		-0.27783	-0.25775
-1.05541	0.073796		-0.51886	0.073796		-0.32279	0.073796		-1.05541	-0.06651		-0.51886	-0.06651		-0.32279	-0.06651
-0.99658	-0.01624		-0.43368	-0.01624		-0.30481	-0.01624		-0.99658	-0.10642		-0.43368	-0.10642		-0.30481	-0.10642
-0.8097	-0.07877		-0.27733	-0.07877		-0.4726	-0.07877		-0.8097	-0.18182		-0.27733	-0.18182		-0.4726	-0.18182
-0.46525	0.173404		-0.27211	0.173404		-0.13547	0.173404		-0.46525	0.084652		-0.27211	0.084652		-0.13547	0.084652
-0.94347	-0.64828		-0.38244	-0.64828		-0.33662	-0.64828		-0.94347	-0.15605		-0.38244	-0.15605		-0.33662	-0.15605
-1.3855	-0.85011		-0.38935	-0.85011		-0.27226	-0.85011		-1.3855	-0.2879		-0.38935	-0.2879		-0.27226	-0.2879
-1.10343	-0.12312		-0.41818	-0.12312		-0.27948	-0.12312		-1.10343	-0.34063		-0.41818	-0.34063		-0.27948	-0.34063
-1.17603	-0.25515		-0.35728	-0.25515		-0.34068	-0.25515		-1.17603	-0.4401		-0.35728	-0.4401		-0.34068	-0.4401
-0.93463	0.042315		-0.33363	0.042315		-0.23511	0.042315		-0.93463	-0.18988		-0.33363	-0.18988		-0.23511	-0.18988
-0.78277	-0.03138		-0.41264	-0.03138		-0.35408	-0.03138		-0.78277	-0.28169		-0.41264	-0.28169		-0.35408	-0.28169
-0.41162	-0.54964		-0.38037	-0.54964		-0.12858	-0.54964		-0.41162	-0.22486		-0.38037	-0.22486		-0.12858	-0.22486
-0.80126	-0.107		-0.42673	-0.107		-0.37657	-0.107		-0.80126	-0.18027		-0.42673	-0.18027		-0.37657	-0.18027
-0.69556	-0.07433		-0.34781	-0.07433		-0.38134	-0.07433		-0.69556	-0.32459		-0.34781	-0.32459		-0.38134	-0.32459
-0.88814	-0.36432		-0.29515	-0.36432		-0.22316	-0.36432		-0.88814	-0.24921		-0.29515	-0.24921		-0.22316	-0.24921
-0.91311	-0.03089		-0.27322	-0.03089		-0.39505	-0.03089		-0.91311	-0.14302		-0.27322	-0.14302		-0.39505	-0.14302
-0.98259	-0.40236		-0.49553	-0.40236		-0.43741	-0.40236		-0.98259	-0.32236		-0.49553	-0.32236		-0.43741	-0.32236
-1.07204	-0.41513		-0.57925	-0.41513		-0.15798	-0.41513		-1.07204	-0.25899		-0.57925	-0.25899		-0.15798	-0.25899
-0.69383	-0.1526		-0.27475	-0.1526		-0.34829	-0.1526		-0.69383	-0.57302		-0.27475	-0.57302		-0.34829	-0.57302
-1.51022	-0.26516		-0.27713	-0.26516		-0.45216	-0.26516		-1.51022	-0.45558		-0.27713	-0.45558		-0.45216	-0.45558
-0.28505	0.001014		-0.32232	0.001014		-0.42684	0.001014		-0.28505	-0.28037		-0.32232	-0.28037		-0.42684	-0.28037
-0.85299	0.056482		-0.64163	0.056482		-0.43953	0.056482		-0.85299	-0.41832		-0.64163	-0.41832		-0.43953	-0.41832
-1.19705	-0.87671		-0.20124	-0.87671		-0.48331	-0.87671		-1.19705	-0.58959		-0.20124	-0.58959		-0.48331	-0.58959
-1.33056	-0.01958		-0.28319	-0.01958		-0.10741	-0.01958		-1.33056	-0.37596		-0.28319	-0.37596		-0.10741	-0.37596
-1.02683	-0.04393		-0.2788	-0.04393		0.328838	-0.04393		-1.02683	-0.13955		-0.2788	-0.13955		0.328838	-0.13955
-1.02419	-0.28649		-0.51059	-0.28649		-0.50309	-0.28649		-1.02419	-0.46336		-0.51059	-0.46336		-0.50309	-0.46336
-0.69972	0.010936		-0.05125	0.010936		0.120654	0.010936		-0.69972	-0.22817		-0.05125	-0.22817		0.120654	-0.22817
-0.80631	0.037387		-0.46052	0.037387		-0.3072	0.037387		-0.80631	-0.28997		-0.46052	-0.28997		-0.3072	-0.28997
-0.6695	-0.40775		-0.62042	-0.40775		-0.31486	-0.40775		-0.6695	-0.2311		-0.62042	-0.2311		-0.31486	-0.2311
-0.68234	-0.40026		-0.37858	-0.40026		-0.45816	-0.40026		-0.68234	-0.1857		-0.37858	-0.1857		-0.45816	-0.1857
-0.92467	-0.07054		-0.27241	-0.07054		-0.08347	-0.07054		-0.92467	-0.35885		-0.27241	-0.35885		-0.08347	-0.35885
-1.07637	0.017747		-0.1803	0.017747		-0.44432	0.017747		-1.07637	-0.20716		-0.1803	-0.20716		-0.44432	-0.20716
-0.98383	0.032092		-0.11222	0.032092		-0.3291	0.032092		-0.98383	-0.49927		-0.11222	-0.49927		-0.3291	-0.49927
-0.7535	0.000599		-0.42867	0.000599		-0.42641	0.000599		-0.7535	-0.14121		-0.42867	-0.14121		-0.42641	-0.14121
-0.50863	-0.49771		-0.20027	-0.49771		-0.17279	-0.49771		-0.50863	-0.18873		-0.20027	-0.18873		-0.17279	-0.18873
-1.07422	-0.19828		-0.48456	-0.19828		-0.52406	-0.19828		-1.07422	-0.40091		-0.48456	-0.40091		-0.52406	-0.40091
-0.84493	-0.15881		-0.4354	-0.15881		-0.36318	-0.15881		-0.84493	-0.20063		-0.4354	-0.20063		-0.36318	-0.20063
-0.84384			-0.21351			-0.31172			-0.84384	-0.16159		-0.21351	-0.16159		-0.31172	-0.16159
-1.04097	-0.72596		-0.21271	-0.72596		-0.27385	-0.72596		-1.04097	-0.41111		-0.21271	-0.41111		-0.27385	-0.41111
-0.76548	-0.31825		-0.04384	-0.31825		-0.13091	-0.31825		-0.76548	-0.20231		-0.04384	-0.20231		-0.13091	-0.20231
-0.74947	-0.01507		-0.02924	-0.01507		-0.33019	-0.01507		-0.74947	-0.28032		-0.02924	-0.28032		-0.33019	-0.28032
-0.69676	-0.22356		-0.50805	-0.22356		-0.22591	-0.22356		-0.69676	-0.46657		-0.50805	-0.46657		-0.22591	-0.46657
-0.48997	-0.15506		-0.14924	-0.15506		-0.30785	-0.15506		-0.48997	-0.37085		-0.14924	-0.37085		-0.30785	-0.37085
-0.90539	-0.00194		-0.28435	-0.00194		-0.54208	-0.00194		-0.90539	-0.15972		-0.28435	-0.15972		-0.54208	-0.15972
-0.7921	-0.46598		-0.23077	-0.46598		-0.17385	-0.46598		-0.7921	-0.57437		-0.23077	-0.57437		-0.17385	-0.57437
-1.22899	-0.18816		-0.39642	-0.18816		-0.52532	-0.18816		-1.22899	-0.26849		-0.39642	-0.26849		-0.52532	-0.26849
-0.52249	-0.62554		-0.297	-0.62554		-0.45343	-0.62554		-0.52249	-0.18706		-0.297	-0.18706		-0.45343	-0.18706
-0.94914	0.109241		-0.50136	0.109241		0.013785	0.109241		-0.94914	-0.34541		-0.50136	-0.34541		0.013785	-0.34541
-1.26996	-0.27982		-0.69234	-0.27982		-0.56193	-0.27982		-1.26996	-0.12414		-0.69234	-0.12414		-0.56193	-0.12414
-0.2959	0.088549		-0.22104	0.088549		-0.02548	0.088549		-0.2959	-0.24377		-0.22104	-0.24377		-0.02548	-0.24377
-1.41727	-0.71018		-0.47998	-0.71018		-0.6604	-0.71018		-1.41727	-0.27522		-0.47998	-0.27522		-0.6604	-0.27522
-1.01244	-0.39064		-0.41134	-0.39064		-0.30337	-0.39064		-1.01244	-0.24486		-0.41134	-0.24486		-0.30337	-0.24486
-0.62306	-0.00988		-0.28763	-0.00988		-0.33782	-0.00988		-0.62306	-0.18354		-0.28763	-0.18354		-0.33782	-0.18354
-0.81478	-0.07962		-0.36942	-0.07962		-0.54356	-0.07962		-0.81478	-0.01961		-0.36942	-0.01961		-0.54356	-0.01961
-0.79033	-0.07876		-0.19612	-0.07876		-0.46647	-0.07876		-0.79033	-0.188		-0.19612	-0.188		-0.46647	-0.188
-0.80122	-0.11666		-0.30021	-0.11666		-0.38986	-0.11666		-0.80122	-0.4178		-0.30021	-0.4178		-0.38986	-0.4178
-0.59882	-0.05534		-0.14363	-0.05534		-0.34918	-0.05534		-0.59882	-0.08933		-0.14363	-0.08933		-0.34918	-0.08933
-1.16177	-0.18515		-0.58005	-0.18515		-0.34616	-0.18515		-1.16177	-0.19701		-0.58005	-0.19701		-0.34616	-0.19701
-0.20752	-0.08144		-0.49295	-0.08144		-0.23928	-0.08144		-0.20752	-0.1951		-0.49295	-0.1951		-0.23928	-0.1951
-1.07083	-0.12906		-0.15247	-0.12906		-0.38603	-0.12906		-1.07083	-0.28687		-0.15247	-0.28687		-0.38603	-0.28687
-0.97083	-0.24823		-0.25989	-0.24823		-0.89263	-0.24823		-0.97083	-0.24091		-0.25989	-0.24091		-0.89263	-0.24091
-0.76905	-0.21684		-0.42865	-0.21684		-0.43784	-0.21684		-0.76905	-0.26194		-0.42865	-0.26194		-0.43784	-0.26194
-0.9491	-0.32691		-0.28685	-0.32691		-0.49314	-0.32691		-0.9491	-0.4539		-0.28685	-0.4539		-0.49314	-0.4539
-0.61501	-0.28133		-0.32522	-0.28133		-0.35421	-0.28133		-0.61501	-0.26016		-0.32522	-0.26016		-0.35421	-0.26016
-0.92817	-0.2135		-0.27595	-0.2135		-0.55587	-0.2135		-0.92817	-0.1014		-0.27595	-0.1014		-0.55587	-0.1014
-0.98261	-0.02552		-0.39083	-0.02552		-0.39532	-0.02552		-0.98261	-0.17365		-0.39083	-0.17365		-0.39532	-0.17365
-0.63542	0.067506		-0.08775	0.067506		-0.17182	0.067506		-0.63542	-0.21829		-0.08775	-0.21829		-0.17182	-0.21829
-0.51363	0.138021		-0.4689	0.138021		-0.4445	0.138021		-0.51363	-0.10451		-0.4689	-0.10451		-0.4445	-0.10451
-1.15315	-0.02991		-0.34156	-0.02991		-0.61487	-0.02991		-1.15315	-0.28277		-0.34156	-0.28277		-0.61487	-0.28277
-1.23283	0.064982		-0.3592	0.064982		-0.56772	0.064982		-1.23283	-0.33485		-0.3592	-0.33485		-0.56772	-0.33485
-1.15445	0.002326		-0.37746	0.002326		-0.24769	0.002326		-1.15445	-0.34959		-0.37746	-0.34959		-0.24769	-0.34959
-0.90556	-0.484		-0.46187	-0.484		-0.54377	-0.484		-0.90556	-0.37748		-0.46187	-0.37748		-0.54377	-0.37748
-1.30495	-0.37048		-0.58103	-0.37048		-0.85069	-0.37048		-1.30495	-0.27934		-0.58103	-0.27934		-0.85069	-0.27934
-0.80708	-0.12872		-0.48567	-0.12872		-0.30791	-0.12872		-0.80708	-0.44064		-0.48567	-0.44064		-0.30791	-0.44064
-0.74419	0.014582		-0.23514	0.014582		-0.57678	0.014582		-0.74419	-0.21566		-0.23514	-0.21566		-0.57678	-0.21566
-0.81164	-0.57326		-0.36377	-0.57326		-0.32554	-0.57326		-0.81164	-0.41082		-0.36377	-0.41082		-0.32554	-0.41082
-1.17871	-0.15477		-0.44999	-0.15477		-0.66405	-0.15477		-1.17871	-0.25625		-0.44999	-0.25625		-0.66405	-0.25625
-1.05773	-0.14211		-0.08246	-0.14211		-0.3537	-0.14211		-1.05773	-0.06463		-0.08246	-0.06463		-0.3537	-0.06463
-0.89481	-0.05146		-0.42125	-0.05146		-0.54269	-0.05146		-0.89481	-0.30768		-0.42125	-0.30768		-0.54269	-0.30768
-0.52026	-0.26666		-0.45371	-0.26666		-0.51314	-0.26666		-0.52026	-0.40379		-0.45371	-0.40379		-0.51314	-0.40379
-0.96277	-0.17668		-0.29105	-0.17668		-0.24237	-0.17668		-0.96277	-0.4412		-0.29105	-0.4412		-0.24237	-0.4412
-1.16061	-0.169		-0.37547	-0.169		-0.23808	-0.169		-1.16061	-0.3362		-0.37547	-0.3362		-0.23808	-0.3362
-0.4484	-0.49458		-0.37206	-0.49458		-0.20889	-0.49458		-0.4484	-0.14881		-0.37206	-0.14881		-0.20889	-0.14881
-0.67645	-0.14192		-0.2917	-0.14192		-0.2891	-0.14192		-0.67645	-0.30128		-0.2917	-0.30128		-0.2891	-0.30128
-0.64176	-0.22239		-0.2621	-0.22239		-0.46344	-0.22239		-0.64176	-0.45018		-0.2621	-0.45018		-0.46344	-0.45018
-0.59311	-0.22435		-0.40253	-0.22435		-0.12224	-0.22435		-0.59311	-0.2009		-0.40253	-0.2009		-0.12224	-0.2009
-0.98597	-0.30737		-0.41851	-0.30737		-0.43754	-0.30737		-0.98597	-0.18548		-0.41851	-0.18548		-0.43754	-0.18548
-0.21914	-0.42337		-0.43363	-0.42337		-0.33018	-0.42337		-0.21914	-0.31811		-0.43363	-0.31811		-0.33018	-0.31811
-0.70531	-0.39303		-0.7819	-0.39303		-0.30251	-0.39303		-0.70531	-0.58769		-0.7819	-0.58769		-0.30251	-0.58769
-0.53593	-0.65731		-0.41172	-0.65731		-0.01425	-0.65731		-0.53593	-0.43444		-0.41172	-0.43444		-0.01425	-0.43444
-0.72462	-0.30593		-0.40693	-0.30593		-0.2496	-0.30593		-0.72462	-0.1582		-0.40693	-0.1582		-0.2496	-0.1582
-0.43018	-0.08621		-0.36883	-0.08621		-0.37566	-0.08621		-0.43018	-0.23394		-0.36883	-0.23394		-0.37566	-0.23394
-0.97817	-0.31394		-0.46284	-0.31394		-0.62668	-0.31394		-0.97817	-0.38613		-0.46284	-0.38613		-0.62668	-0.38613
-0.93951	-0.51996		-0.50712	-0.51996		-0.55987	-0.51996		-0.93951	-0.46292		-0.50712	-0.46292		-0.55987	-0.46292
-0.12763	0.259096		-0.21483	0.259096		-0.13517	0.259096		-0.12763	0.003182		-0.21483	0.003182		-0.13517	0.003182
-1.3194	-0.29244		-0.45826	-0.29244		-0.70451	-0.29244		-1.3194	-0.37933		-0.45826	-0.37933		-0.70451	-0.37933
-0.88825	-0.19217		-0.43877	-0.19217		-0.20374	-0.19217		-0.88825	-0.36251		-0.43877	-0.36251		-0.20374	-0.36251
-0.6126	-0.49825		-0.3553	-0.49825		-0.09798	-0.49825		-0.6126	-0.19926		-0.3553	-0.19926		-0.09798	-0.19926
-1.22849	-0.28836		-0.14597	-0.28836		-0.26138	-0.28836		-1.22849	-0.28049		-0.14597	-0.28049		-0.26138	-0.28049
-1.28428	-0.52444		-0.30894	-0.52444		-0.35355	-0.52444		-1.28428	-0.43215		-0.30894	-0.43215		-0.35355	-0.43215
-0.79178	-0.16993		-0.18732	-0.16993		-0.29105	-0.16993		-0.79178	-0.36209		-0.18732	-0.36209		-0.29105	-0.36209
-1.18732	-0.11959		-0.33917	-0.11959		-0.29532	-0.11959		-1.18732	-0.24449		-0.33917	-0.24449		-0.29532	-0.24449
-0.90581	-0.57727		-0.22074	-0.57727		-0.39803	-0.57727		-0.90581	-0.49408		-0.22074	-0.49408		-0.39803	-0.49408
-0.70504	-0.04113		-0.53534	-0.04113		0.174219	-0.04113		-0.70504	-0.14887		-0.53534	-0.14887		0.174219	-0.14887
-0.89016	-0.6934		-0.41682	-0.6934		-0.43944	-0.6934		-0.89016	-0.56048		-0.41682	-0.56048		-0.43944	-0.56048
-0.3877	0.04705		-0.34421	0.04705		-0.57004	0.04705		-0.3877	-0.01852		-0.34421	-0.01852		-0.57004	-0.01852
-0.7912	-0.11379		-0.22769	-0.11379		-0.2728	-0.11379		-0.7912	-0.23147		-0.22769	-0.23147		-0.2728	-0.23147
-0.62902	0.018149		-0.33267	0.018149		-0.43862	0.018149		-0.62902	-0.17335		-0.33267	-0.17335		-0.43862	-0.17335
-0.59222	-0.5384		-0.46389	-0.5384		-0.31655	-0.5384		-0.59222	-0.23097		-0.46389	-0.23097		-0.31655	-0.23097
-1.4839	-0.03892		-0.54257	-0.03892		-0.4106	-0.03892		-1.4839	-0.20297		-0.54257	-0.20297		-0.4106	-0.20297
-0.68197	-0.36883		-0.62094	-0.36883		-0.25877	-0.36883		-0.68197	-0.39549		-0.62094	-0.39549		-0.25877	-0.39549
-1.16591	0.000431		-0.2958	0.000431		-0.66928	0.000431		-1.16591	-0.10517		-0.2958	-0.10517		-0.66928	-0.10517
-0.80319	-0.25745		-0.29732	-0.25745		-0.43844	-0.25745		-0.80319	-0.33899		-0.29732	-0.33899		-0.43844	-0.33899
-0.85217	-0.39001		-0.54804	-0.39001		-0.45661	-0.39001		-0.85217	-0.13255		-0.54804	-0.13255		-0.45661	-0.13255
-1.10715	-0.41134		-0.41395	-0.41134		-0.35753	-0.41134		-1.10715	-0.3437		-0.41395	-0.3437		-0.35753	-0.3437
-0.62459	-0.1379		-0.12664	-0.1379		-0.31764	-0.1379		-0.62459	-0.27311		-0.12664	-0.27311		-0.31764	-0.27311
-0.95968	-0.42416		-0.33414	-0.42416		-0.36366	-0.42416		-0.95968	-0.29504		-0.33414	-0.29504		-0.36366	-0.29504
-0.70873	-0.25735		-0.42499	-0.25735		-0.36228	-0.25735		-0.70873	-0.15399		-0.42499	-0.15399		-0.36228	-0.15399
-1.25522	-0.37775		-0.35219	-0.37775		-0.70004	-0.37775		-1.25522	-0.18299		-0.35219	-0.18299		-0.70004	-0.18299
-1.26527	0.043511		-0.40465	0.043511		-0.5217	0.043511		-1.26527	-0.29181		-0.40465	-0.29181		-0.5217	-0.29181
-1.32155	-0.08048		-0.58545	-0.08048		-0.30382	-0.08048		-1.32155	-0.16516		-0.58545	-0.16516		-0.30382	-0.16516
-0.69318	0.168805		-0.5555	0.168805		-0.49531	0.168805		-0.69318	-0.43077		-0.5555	-0.43077		-0.49531	-0.43077
-0.99345	-0.49832		-0.34336	-0.49832		-0.33312	-0.49832		-0.99345	-0.34948		-0.34336	-0.34948		-0.33312	-0.34948
-1.04684	-0.43179		-0.42306	-0.43179		-0.19628	-0.43179		-1.04684	-0.58513		-0.42306	-0.58513		-0.19628	-0.58513
-0.05789	0.091729		-0.46835	0.091729		-0.81747	0.091729		-0.05789	-0.37401		-0.46835	-0.37401		-0.81747	-0.37401
-0.8375	-0.08088		-0.3899	-0.08088		-0.67777	-0.08088		-0.8375	-0.20657		-0.3899	-0.20657		-0.67777	-0.20657
-0.93732	-0.32408		-0.50975	-0.32408		-0.45962	-0.32408		-0.93732	-0.26297		-0.50975	-0.26297		-0.45962	-0.26297
-0.7182	-0.21818		-0.27037	-0.21818		-0.30221	-0.21818		-0.7182	-0.35291		-0.27037	-0.35291		-0.30221	-0.35291
-0.6393	-0.21981		-0.702	-0.21981		-0.26724	-0.21981		-0.6393	-0.30895		-0.702	-0.30895		-0.26724	-0.30895
-1.00477	-0.6356		-0.56999	-0.6356		-0.42645	-0.6356		-1.00477	-0.11897		-0.56999	-0.11897		-0.42645	-0.11897
-0.89638	0.112184		-0.11	0.112184		-0.25872	0.112184		-0.89638	-0.35653		-0.11	-0.35653		-0.25872	-0.35653
-1.06009	-0.21743		-0.37154	-0.21743		-0.57339	-0.21743		-1.06009	-0.26731		-0.37154	-0.26731		-0.57339	-0.26731
-1.5743	-0.47702		-0.1539	-0.47702		-0.53594	-0.47702		-1.5743	-0.40363		-0.1539	-0.40363		-0.53594	-0.40363
-0.23563	-0.88994		-0.38173	-0.88994		-0.10711	-0.88994		-0.23563	-0.39441		-0.38173	-0.39441		-0.10711	-0.39441
-0.71136	-0.09828		-0.27286	-0.09828		-0.33263	-0.09828		-0.71136	-0.39499		-0.27286	-0.39499		-0.33263	-0.39499
-1.35277	-0.13235		-0.30429	-0.13235		-0.59341	-0.13235		-1.35277	-0.18001		-0.30429	-0.18001		-0.59341	-0.18001
-0.91331	-0.7226		-0.45207	-0.7226		-0.35043	-0.7226		-0.91331	-0.30918		-0.45207	-0.30918		-0.35043	-0.30918
-0.86796	-0.41093		-0.32248	-0.41093		-0.2351	-0.41093		-0.86796	-0.127		-0.32248	-0.127		-0.2351	-0.127
-0.84162	-0.10335		-0.3892	-0.10335		-0.35319	-0.10335		-0.84162	-0.44239		-0.3892	-0.44239		-0.35319	-0.44239
-0.3945	-0.1437		-0.25189	-0.1437		-0.22751	-0.1437		-0.3945	-0.2159		-0.25189	-0.2159		-0.22751	-0.2159
-0.52952	-0.39046		-0.2805	-0.39046		-0.12684	-0.39046		-0.52952	-0.28827		-0.2805	-0.28827		-0.12684	-0.28827
-1.10672	-0.26563		-0.27283	-0.26563		-0.37812	-0.26563		-1.10672	-0.94795		-0.27283	-0.94795		-0.37812	-0.94795
-0.6876	-0.4427		-0.53874	-0.4427		-0.35123	-0.4427		-0.6876	-0.30301		-0.53874	-0.30301		-0.35123	-0.30301
-1.01357	0.053534		-0.40436	0.053534		-0.51039	0.053534		-1.01357	-0.12964		-0.40436	-0.12964		-0.51039	-0.12964
-0.73938	-0.06529		-0.33688	-0.06529		-0.15945	-0.06529		-0.73938	-0.37072		-0.33688	-0.37072		-0.15945	-0.37072
-1.06629	-0.83964		-0.17819	-0.83964		-0.63865	-0.83964		-1.06629	-0.29951		-0.17819	-0.29951		-0.63865	-0.29951
-0.98219	0.137046		-0.51338	0.137046		-0.22834	0.137046		-0.98219	0.011852		-0.51338	0.011852		-0.22834	0.011852
-0.83352	-0.24416		-0.41721	-0.24416		-0.41266	-0.24416		-0.83352	-0.15062		-0.41721	-0.15062		-0.41266	-0.15062
-0.67608	-0.31859		-0.20008	-0.31859		-0.27966	-0.31859		-0.67608	-0.38893		-0.20008	-0.38893		-0.27966	-0.38893
-0.86363	-0.29236		-0.41246	-0.29236		-0.27897	-0.29236		-0.86363	-0.37969		-0.41246	-0.37969		-0.27897	-0.37969
-0.76097	-0.34575		-0.42038	-0.34575		-0.28215	-0.34575		-0.76097	-0.2985		-0.42038	-0.2985		-0.28215	-0.2985
-0.72029	-0.38932		-0.6033	-0.38932		-0.23828	-0.38932		-0.72029	-0.47202		-0.6033	-0.47202		-0.23828	-0.47202
-1.27953	-0.44225		-0.37021	-0.44225		-0.89267	-0.44225		-1.27953	-0.4528		-0.37021	-0.4528		-0.89267	-0.4528
-1.16246	-0.27891		-0.27737	-0.27891		-0.1642	-0.27891		-1.16246	-0.3626		-0.27737	-0.3626		-0.1642	-0.3626
-1.06563	-0.88865		-0.36132	-0.88865		-0.50992	-0.88865		-1.06563	-0.18538		-0.36132	-0.18538		-0.50992	-0.18538
-1.259	0.076182		-0.32517	0.076182		-0.57268	0.076182		-1.259	-0.35276		-0.32517	-0.35276		-0.57268	-0.35276
-0.70482	-0.17953		-0.33327	-0.17953		-0.17666	-0.17953		-0.70482	-0.17695		-0.33327	-0.17695		-0.17666	-0.17695
-1.42389	-0.04774		-0.35982	-0.04774		-0.55585	-0.04774		-1.42389	-0.26092		-0.35982	-0.26092		-0.55585	-0.26092
-0.48031	-0.43477		-0.36896	-0.43477		-0.3225	-0.43477		-0.48031	-0.35434		-0.36896	-0.35434		-0.3225	-0.35434
-1.69237	-0.02959		-0.13944	-0.02959		-0.31652	-0.02959		-1.69237	-0.21471		-0.13944	-0.21471		-0.31652	-0.21471
-0.60742	-0.38585		-0.58731	-0.38585		-0.06252	-0.38585		-0.60742	-0.30557		-0.58731	-0.30557		-0.06252	-0.30557
-0.77837	-0.53072		-0.16731	-0.53072		-0.33242	-0.53072		-0.77837	-0.18192		-0.16731	-0.18192		-0.33242	-0.18192
-0.68175	-0.16543		-0.24968	-0.16543		-0.15386	-0.16543		-0.68175	-0.11457		-0.24968	-0.11457		-0.15386	-0.11457
-0.75944	-0.19986		-0.70564	-0.19986		-0.24195	-0.19986		-0.75944	-0.3501		-0.70564	-0.3501		-0.24195	-0.3501
-0.89726	-0.8547		-0.3026	-0.8547		-0.39259	-0.8547		-0.89726	-0.28391		-0.3026	-0.28391		-0.39259	-0.28391
-0.46864	-0.2496		-0.20225	-0.2496		-0.31075	-0.2496		-0.46864	-0.08719		-0.20225	-0.08719		-0.31075	-0.08719
-0.97057	-0.02278		-0.41161	-0.02278		-0.0132	-0.02278		-0.97057	-0.36039		-0.41161	-0.36039		-0.0132	-0.36039
-0.6232	-0.74705		-0.44189	-0.74705		-0.23486	-0.74705		-0.6232	-0.1739		-0.44189	-0.1739		-0.23486	-0.1739
-1.24448	-0.57423		-0.44012	-0.57423		-0.35325	-0.57423		-1.24448	-0.30595		-0.44012	-0.30595		-0.35325	-0.30595
-0.58787	-0.0203		-0.13902	-0.0203		-0.27934	-0.0203		-0.58787	0.001196		-0.13902	0.001196		-0.27934	0.001196
-0.9626	0.01444		0.019768	0.01444		-0.769	0.01444		-0.9626	-0.07922		0.019768	-0.07922		-0.769	-0.07922
-1.17735	-0.36308		-0.35446	-0.36308		-0.40948	-0.36308		-1.17735	-0.50724		-0.35446	-0.50724		-0.40948	-0.50724
-0.9203	-0.21004		-0.04465	-0.21004		0.050367	-0.21004		-0.9203	-0.2917		-0.04465	-0.2917		0.050367	-0.2917
-1.0122	-0.07406		-0.20781	-0.07406		0.178864	-0.07406		-1.0122	-0.24998		-0.20781	-0.24998		0.178864	-0.24998
-1.0401	0.094686		-0.37263	0.094686		-0.53718	0.094686		-1.0401	-0.32911		-0.37263	-0.32911		-0.53718	-0.32911
-1.19457	-0.06594		-0.11802	-0.06594		-0.62248	-0.06594		-1.19457	-0.31766		-0.11802	-0.31766		-0.62248	-0.31766
-0.71165	-0.10447		-0.3866	-0.10447		-0.25854	-0.10447		-0.71165	-0.27412		-0.3866	-0.27412		-0.25854	-0.27412
-1.3184	-0.30947		-0.38946	-0.30947		-0.4904	-0.30947		-1.3184	-0.37048		-0.38946	-0.37048		-0.4904	-0.37048
-1.09966	-0.24618		-0.4457	-0.24618		-0.33554	-0.24618		-1.09966	-0.13811		-0.4457	-0.13811		-0.33554	-0.13811
-0.50785	0.067747		-0.16498	0.067747		0.324982	0.067747		-0.50785	-0.23583		-0.16498	-0.23583		0.324982	-0.23583
-0.76576	-0.27585		-0.54263	-0.27585		-0.07864	-0.27585		-0.76576	-0.15367		-0.54263	-0.15367		-0.07864	-0.15367
-1.10428	-0.40204		-0.10083	-0.40204		-0.75622	-0.40204		-1.10428	-0.28624		-0.10083	-0.28624		-0.75622	-0.28624
-0.73993	-0.43293		-0.57755	-0.43293		-0.45398	-0.43293		-0.73993	-0.29846		-0.57755	-0.29846		-0.45398	-0.29846
0.17369	-0.1824		-0.48872	-0.1824		-0.15815	-0.1824		0.17369	-0.39772		-0.48872	-0.39772		-0.15815	-0.39772
-0.21557	-0.27832		-0.24831	-0.27832		-0.05551	-0.27832		-0.21557	-0.24126		-0.24831	-0.24126		-0.05551	-0.24126
-0.92552	-0.27164		-0.4461	-0.27164		-0.42423	-0.27164		-0.92552	-0.23477		-0.4461	-0.23477		-0.42423	-0.23477
-0.43049	0.055506		-0.25003	0.055506		-0.30744	0.055506		-0.43049	-0.17715		-0.25003	-0.17715		-0.30744	-0.17715
-1.08721	-0.02063		-0.5185	-0.02063		-1.29544	-0.02063		-1.08721	-0.28459		-0.5185	-0.28459		-1.29544	-0.28459
-0.7053	-0.08454		-0.4954	-0.08454		-0.26456	-0.08454		-0.7053	-0.37257		-0.4954	-0.37257		-0.26456	-0.37257
-0.96826	-0.04491		-0.39827	-0.04491		-0.34522	-0.04491		-0.96826	-0.19025		-0.39827	-0.19025		-0.34522	-0.19025
-0.81679	0.042064		-0.42535	0.042064		-0.36111	0.042064		-0.81679	-0.28593		-0.42535	-0.28593		-0.36111	-0.28593
-0.77278	0.10776		-0.12409	0.10776		-0.25323	0.10776		-0.77278	-0.0279		-0.12409	-0.0279		-0.25323	-0.0279
-0.92933	0.067379		-0.26895	0.067379		-0.42915	0.067379		-0.92933	-0.27115		-0.26895	-0.27115		-0.42915	-0.27115
-0.06867	-0.12287		-0.2991	-0.12287		-0.2926	-0.12287		-0.06867	-0.21791		-0.2991	-0.21791		-0.2926	-0.21791
-0.33452	-0.1243		-0.57018	-0.1243		-0.51953	-0.1243		-0.33452	-0.02948		-0.57018	-0.02948		-0.51953	-0.02948
-1.12155	-0.4962		-0.44322	-0.4962		-0.39979	-0.4962		-1.12155	-0.40042		-0.44322	-0.40042		-0.39979	-0.40042
-0.85332	-0.32999		-0.43501	-0.32999		-0.34378	-0.32999		-0.85332	-0.24085		-0.43501	-0.24085		-0.34378	-0.24085
-0.76355	-0.38675		-0.52206	-0.38675		-0.50728	-0.38675		-0.76355	-0.15458		-0.52206	-0.15458		-0.50728	-0.15458
-0.88071	-0.21712		-0.36478	-0.21712		-0.55602	-0.21712		-0.88071	-0.27849		-0.36478	-0.27849		-0.55602	-0.27849
-0.65627	-0.06196		-0.28714	-0.06196		-0.2823	-0.06196		-0.65627	-0.2332		-0.28714	-0.2332		-0.2823	-0.2332
-0.81933	-0.47103		-0.25532	-0.47103		-0.28658	-0.47103		-0.81933	-0.43236		-0.25532	-0.43236		-0.28658	-0.43236
-0.41932	-0.08058		-0.32852	-0.08058		-0.16867	-0.08058		-0.41932	-0.22379		-0.32852	-0.22379		-0.16867	-0.22379
-0.75539	-0.39873		-0.17672	-0.39873		-0.3166	-0.39873		-0.75539	-0.33263		-0.17672	-0.33263		-0.3166	-0.33263
-0.69372	-0.28667		-0.32172	-0.28667		-0.0803	-0.28667		-0.69372	-0.16748		-0.32172	-0.16748		-0.0803	-0.16748
-0.99357	-0.11764		-0.54054	-0.11764		-0.37927	-0.11764		-0.99357	-0.28127		-0.54054	-0.28127		-0.37927	-0.28127
-0.85788	-0.32033		-0.34761	-0.32033		-0.32361	-0.32033		-0.85788	-0.29333		-0.34761	-0.29333		-0.32361	-0.29333
-0.49607	-0.2055		-0.29518	-0.2055		-0.08975	-0.2055		-0.49607	-0.76152		-0.29518	-0.76152		-0.08975	-0.76152
-0.99681	-0.55256		-0.30519	-0.55256		-0.26283	-0.55256		-0.99681	-0.42248		-0.30519	-0.42248		-0.26283	-0.42248
-0.95291	-0.3907		-0.27544	-0.3907		-0.39799	-0.3907		-0.95291	-0.21338		-0.27544	-0.21338		-0.39799	-0.21338
-1.62338	0.074757		-0.26927	0.074757		-0.2873	0.074757		-1.62338	-0.16712		-0.26927	-0.16712		-0.2873	-0.16712
-0.48767	-0.43761		-0.62913	-0.43761		-0.25228	-0.43761		-0.48767	-0.37524		-0.62913	-0.37524		-0.25228	-0.37524
-0.71217	-0.10598		-0.30887	-0.10598		-0.23639	-0.10598		-0.71217	-0.29062		-0.30887	-0.29062		-0.23639	-0.29062
-0.81967	-0.12663		-0.42336	-0.12663		-0.17748	-0.12663		-0.81967	-0.2783		-0.42336	-0.2783		-0.17748	-0.2783
-0.87601	-0.01144		-0.43313	-0.01144		-0.34318	-0.01144		-0.87601	-0.13636		-0.43313	-0.13636		-0.34318	-0.13636
-0.69491	-0.30978		-0.4816	-0.30978		-0.26274	-0.30978		-0.69491	-0.24928		-0.4816	-0.24928		-0.26274	-0.24928
-0.79191	-0.37341		-0.29348	-0.37341		-0.38043	-0.37341		-0.79191	-0.37537		-0.29348	-0.37537		-0.38043	-0.37537
-0.59731	-0.14222		-0.29907	-0.14222		-0.39229	-0.14222		-0.59731	-0.43776		-0.29907	-0.43776		-0.39229	-0.43776
-0.65286	-0.10078		-0.32774	-0.10078		-0.1873	-0.10078		-0.65286	-0.00657		-0.32774	-0.00657		-0.1873	-0.00657
-0.42454	-0.2796		-0.26875	-0.2796		-0.06875	-0.2796		-0.42454	-0.1198		-0.26875	-0.1198		-0.06875	-0.1198
-0.75179	0.004994		-0.27496	0.004994		-0.53821	0.004994		-0.75179	-0.14484		-0.27496	-0.14484		-0.53821	-0.14484
-0.76338	-0.22462		-0.3591	-0.22462		-0.33392	-0.22462		-0.76338	-0.44553		-0.3591	-0.44553		-0.33392	-0.44553
-1.10355	0.05649		-0.36402	0.05649		-0.28998	0.05649		-1.10355	-0.09462		-0.36402	-0.09462		-0.28998	-0.09462
-1.08079	0.024606		0.066168	0.024606		0.113631	0.024606		-1.08079	-0.1929		0.066168	-0.1929		0.113631	-0.1929
-0.81777	-0.61611		-0.4255	-0.61611		-0.3787	-0.61611		-0.81777	-0.22847		-0.4255	-0.22847		-0.3787	-0.22847
-1.31329	-0.10391		-0.24041	-0.10391		-0.22653	-0.10391		-1.31329	-0.16364		-0.24041	-0.16364		-0.22653	-0.16364
-1.04757	-0.142		-0.46508	-0.142		-0.30289	-0.142		-1.04757	-0.13822		-0.46508	-0.13822		-0.30289	-0.13822
-0.9765	0.015169		-0.24126	0.015169		-0.33515	0.015169		-0.9765	-0.18745		-0.24126	-0.18745		-0.33515	-0.18745
-0.84231	0.026816		-0.44698	0.026816		-0.3581	0.026816		-0.84231	-0.27098		-0.44698	-0.27098		-0.3581	-0.27098
-0.87717	-0.31231		-0.22722	-0.31231		-0.42262	-0.31231		-0.87717	-0.38549		-0.22722	-0.38549		-0.42262	-0.38549
-1.0511	0.034246		-0.23641	0.034246		-0.27131	0.034246		-1.0511	-0.27179		-0.23641	-0.27179		-0.27131	-0.27179
-0.68173	-0.16623		-0.28476	-0.16623		-0.47981	-0.16623		-0.68173	-0.11529		-0.28476	-0.11529		-0.47981	-0.11529
-1.30973	-0.02024		-0.33216	-0.02024		-0.14807	-0.02024		-1.30973	-0.06674		-0.33216	-0.06674		-0.14807	-0.06674
-0.76355	-0.28044		-0.36255	-0.28044		-0.23411	-0.28044		-0.76355	-0.29442		-0.36255	-0.29442		-0.23411	-0.29442
-0.67681	-0.33348		-0.3854	-0.33348		-0.51913	-0.33348		-0.67681	-0.37753		-0.3854	-0.37753		-0.51913	-0.37753
-0.74819	-0.10982		-0.21497	-0.10982		-0.25608	-0.10982		-0.74819	-0.24065		-0.21497	-0.24065		-0.25608	-0.24065
-0.04915	-0.18177		-0.25	-0.18177		0.041493	-0.18177		-0.04915	-0.42367		-0.25	-0.42367		0.041493	-0.42367
-1.0362	0.022651		-0.10679	0.022651		-0.27293	0.022651		-1.0362	-0.02818		-0.10679	-0.02818		-0.27293	-0.02818
-0.78345	-0.76807		-0.3601	-0.76807		-0.27777	-0.76807		-0.78345	-0.32524		-0.3601	-0.32524		-0.27777	-0.32524
-1.16736	-0.34779		-0.29126	-0.34779		-0.3168	-0.34779		-1.16736	-0.04929		-0.29126	-0.04929		-0.3168	-0.04929
-0.52948	-0.14249		-0.52508	-0.14249		-0.21866	-0.14249		-0.52948	-0.27719		-0.52508	-0.27719		-0.21866	-0.27719
-0.68802	0.056624		-0.5914	0.056624		-0.62452	0.056624		-0.68802	-0.56405		-0.5914	-0.56405		-0.62452	-0.56405
-0.58034	-0.48027		-0.65154	-0.48027		-0.11305	-0.48027		-0.58034	-0.15391		-0.65154	-0.15391		-0.11305	-0.15391
-1.183	-0.09711		-0.34921	-0.09711		-0.2479	-0.09711		-1.183	-0.53142		-0.34921	-0.53142		-0.2479	-0.53142
-0.13923	-0.08367		-0.16535	-0.08367		-0.13603	-0.08367		-0.13923	-0.20938		-0.16535	-0.20938		-0.13603	-0.20938
-1.11784	-0.34905		-0.19626	-0.34905		-0.11552	-0.34905		-1.11784	-0.33644		-0.19626	-0.33644		-0.11552	-0.33644
-0.53968	-0.19092		-0.16031	-0.19092		-0.258	-0.19092		-0.53968	-0.24815		-0.16031	-0.24815		-0.258	-0.24815
-1.1172	-0.77524		-0.23113	-0.77524		-0.92531	-0.77524		-1.1172	-0.27349		-0.23113	-0.27349		-0.92531	-0.27349
-0.80442	-0.05472		-0.40319	-0.05472		-0.18797	-0.05472		-0.80442	-0.15229		-0.40319	-0.15229		-0.18797	-0.15229
-0.56338	-0.07175		-0.51528	-0.07175		-0.26866	-0.07175		-0.56338	-0.205		-0.51528	-0.205		-0.26866	-0.205
-0.87706	-0.21332		-0.54856	-0.21332		-0.55435	-0.21332		-0.87706	-0.16465		-0.54856	-0.16465		-0.55435	-0.16465
-0.94554	-0.31021		-0.36461	-0.31021		-0.31085	-0.31021		-0.94554	-0.26068		-0.36461	-0.26068		-0.31085	-0.26068
-0.68795	0.066561		-0.55975	0.066561		-0.4468	0.066561		-0.68795	-0.27169		-0.55975	-0.27169		-0.4468	-0.27169
-0.58456	-0.06036		-0.36132	-0.06036		0.02485	-0.06036		-0.58456	-0.11169		-0.36132	-0.11169		0.02485	-0.11169
-0.75145	-0.19091		-0.43178	-0.19091		-0.26209	-0.19091		-0.75145	-0.22273		-0.43178	-0.22273		-0.26209	-0.22273
-0.72497	-0.23438		-0.26229	-0.23438		-0.33966	-0.23438		-0.72497	-0.29773		-0.26229	-0.29773		-0.33966	-0.29773
-1.09078	-0.39894		-0.44199	-0.39894		-0.59388	-0.39894		-1.09078	-0.4318		-0.44199	-0.4318		-0.59388	-0.4318
-1.4763	-0.0491		-0.47936	-0.0491		-0.81059	-0.0491		-1.4763	-0.23821		-0.47936	-0.23821		-0.81059	-0.23821
-0.67585	-0.23362		-0.45087	-0.23362		-0.35236	-0.23362		-0.67585	-0.29398		-0.45087	-0.29398		-0.35236	-0.29398
-0.18949	-0.33029		-0.27151	-0.33029		-0.28366	-0.33029		-0.18949	-0.25217		-0.27151	-0.25217		-0.28366	-0.25217
-1.34268	-0.16655		-0.60055	-0.16655		-0.43762	-0.16655		-1.34268	-0.59325		-0.60055	-0.59325		-0.43762	-0.59325
-0.58504	-0.84356		-0.42866	-0.84356		-0.04034	-0.84356		-0.58504	-0.32095		-0.42866	-0.32095		-0.04034	-0.32095
-0.85372	-0.17963		-0.43669	-0.17963		-0.1751	-0.17963		-0.85372	-0.23081		-0.43669	-0.23081		-0.1751	-0.23081
-1.06877	0.030153		-0.25551	0.030153		-0.17406	0.030153		-1.06877	-0.20695		-0.25551	-0.20695		-0.17406	-0.20695
-0.82867	-0.22126		-0.29776	-0.22126		0.090691	-0.22126		-0.82867	-0.19886		-0.29776	-0.19886		0.090691	-0.19886
-0.72316	-0.31797		-0.58777	-0.31797		-0.28065	-0.31797		-0.72316	-0.13273		-0.58777	-0.13273		-0.28065	-0.13273
-0.96458	-0.3364		-0.26646	-0.3364		-0.22937	-0.3364		-0.96458	-0.14089		-0.26646	-0.14089		-0.22937	-0.14089
-0.74851	-0.14515		-0.41626	-0.14515		-0.33616	-0.14515		-0.74851	-0.24872		-0.41626	-0.24872		-0.33616	-0.24872
-1.14534	-0.15831		-0.31903	-0.15831		-0.62015	-0.15831		-1.14534	-0.28921		-0.31903	-0.28921		-0.62015	-0.28921
-0.87353	0.008687		-0.3751	0.008687		-0.11439	0.008687		-0.87353	-0.20717		-0.3751	-0.20717		-0.11439	-0.20717
-1.24944	-0.13376		-0.41033	-0.13376		-0.44478	-0.13376		-1.24944	-0.05337		-0.41033	-0.05337		-0.44478	-0.05337
-0.99793	-0.20572		-0.59305	-0.20572		-0.50833	-0.20572		-0.99793	-0.86921		-0.59305	-0.86921		-0.50833	-0.86921
-1.30412	-0.00624		-0.36062	-0.00624		-0.52676	-0.00624		-1.30412	-0.43237		-0.36062	-0.43237		-0.52676	-0.43237
-0.8118	-0.35169		-0.38238	-0.35169		-0.37138	-0.35169		-0.8118	-0.39836		-0.38238	-0.39836		-0.37138	-0.39836
-1.08046	-0.24464		-0.31452	-0.24464		-0.22747	-0.24464		-1.08046	-0.32491		-0.31452	-0.32491		-0.22747	-0.32491
-1.30494	-0.76314		-0.55924	-0.76314		-0.37923	-0.76314		-1.30494	-0.5186		-0.55924	-0.5186		-0.37923	-0.5186
-0.8674	-0.04973		-0.18118	-0.04973		-0.43347	-0.04973		-0.8674	-0.17313		-0.18118	-0.17313		-0.43347	-0.17313
-0.87004	-0.76316		-0.38411	-0.76316		-0.49403	-0.76316		-0.87004	-0.24233		-0.38411	-0.24233		-0.49403	-0.24233
-0.39853	0.08258		-0.34615	0.08258		-0.12187	0.08258		-0.39853	-0.1922		-0.34615	-0.1922		-0.12187	-0.1922
-0.56524	-0.29401		-0.24094	-0.29401		-0.33758	-0.29401		-0.56524	-0.244		-0.24094	-0.244		-0.33758	-0.244
-1.4294	-0.439		-0.23192	-0.439		-0.94942	-0.439		-1.4294	-0.4629		-0.23192	-0.4629		-0.94942	-0.4629
-1.2501	-0.22763		-0.39376	-0.22763		-0.49121	-0.22763		-1.2501	-0.22104		-0.39376	-0.22104		-0.49121	-0.22104
-0.5542	0.002357		-0.23228	0.002357		-0.4751	0.002357		-0.5542	-0.16772		-0.23228	-0.16772		-0.4751	-0.16772
-0.46492	-0.4775		-0.37552	-0.4775		-0.25505	-0.4775		-0.46492	-0.28822		-0.37552	-0.28822		-0.25505	-0.28822
-1.05429	-0.3832		-0.38655	-0.3832		-0.42675	-0.3832		-1.05429	-0.25972		-0.38655	-0.25972		-0.42675	-0.25972
-1.44115	-0.05456		-0.31436	-0.05456		-0.17877	-0.05456		-1.44115	-0.25519		-0.31436	-0.25519		-0.17877	-0.25519
-1.14732	-0.1662		-0.64859	-0.1662		-0.53254	-0.1662		-1.14732	-0.39998		-0.64859	-0.39998		-0.53254	-0.39998
-0.47695	-0.11955		-0.33368	-0.11955		-0.45608	-0.11955		-0.47695	-0.16619		-0.33368	-0.16619		-0.45608	-0.16619
-0.32661	-0.0465		-0.35944	-0.0465		-0.38669	-0.0465		-0.32661	-0.51623		-0.35944	-0.51623		-0.38669	-0.51623
-0.32757	-0.65717		-0.45105	-0.65717		-0.46007	-0.65717		-0.32757	-0.16059		-0.45105	-0.16059		-0.46007	-0.16059
-1.20154	-0.08069		-0.17634	-0.08069		-0.70774	-0.08069		-1.20154	-1.34356		-0.17634	-1.34356		-0.70774	-1.34356
-0.8728	0.100409		-0.27111	0.100409		0.007268	0.100409		-0.8728	-0.06851		-0.27111	-0.06851		0.007268	-0.06851
-0.81025	-0.03263		-0.49111	-0.03263		-0.55277	-0.03263		-0.81025	-0.53255		-0.49111	-0.53255		-0.55277	-0.53255
-0.62995	-0.4737		-0.40706	-0.4737		-0.22949	-0.4737		-0.62995	-0.35542		-0.40706	-0.35542		-0.22949	-0.35542
-1.35744	-0.53693		-0.47553	-0.53693		-0.48984	-0.53693		-1.35744	-0.38609		-0.47553	-0.38609		-0.48984	-0.38609
-1.3371	-0.14493		-0.3103	-0.14493		-0.18848	-0.14493		-1.3371	-0.3133		-0.3103	-0.3133		-0.18848	-0.3133
-1.16222	-0.20644		-0.46988	-0.20644		-0.44778	-0.20644		-1.16222	-0.33672		-0.46988	-0.33672		-0.44778	-0.33672
-0.72777	-0.10058		-0.56314	-0.10058		-0.56635	-0.10058		-0.72777	-0.27108		-0.56314	-0.27108		-0.56635	-0.27108
-1.18332	-0.00198		-0.26937	-0.00198		-0.30643	-0.00198		-1.18332	-0.17843		-0.26937	-0.17843		-0.30643	-0.17843
-0.85664	-0.37012		-0.61384	-0.37012		-0.36005	-0.37012		-0.85664	-0.73082		-0.61384	-0.73082		-0.36005	-0.73082
-1.07368	0.01984		-0.52184	0.01984		-0.12791	0.01984		-1.07368	0.214972		-0.52184	0.214972		-0.12791	0.214972
-1.20899	-0.78396		-0.44446	-0.78396		-0.77566	-0.78396		-1.20899	-0.37		-0.44446	-0.37		-0.77566	-0.37
-0.86001	-0.10625		-0.50801	-0.10625		-0.41967	-0.10625		-0.86001	-0.17949		-0.50801	-0.17949		-0.41967	-0.17949
-0.60603	-0.25078		-0.5351	-0.25078		-0.26521	-0.25078		-0.60603	-0.17947		-0.5351	-0.17947		-0.26521	-0.17947
-1.23993	-0.50933		-0.40218	-0.50933		-0.37879	-0.50933		-1.23993	-0.55317		-0.40218	-0.55317		-0.37879	-0.55317
-0.46958	-0.31735		-0.36307	-0.31735		-0.27202	-0.31735		-0.46958	-0.25868		-0.36307	-0.25868		-0.27202	-0.25868
-0.60389	-0.38036		-0.31347	-0.38036		-0.2417	-0.38036		-0.60389	-0.29564		-0.31347	-0.29564		-0.2417	-0.29564
-0.643	0.009963		-0.23762	0.009963		-0.49551	0.009963		-0.643	-0.17985		-0.23762	-0.17985		-0.49551	-0.17985
-1.53375	-0.02223		-0.18197	-0.02223		-0.37219	-0.02223		-1.53375	-0.3025		-0.18197	-0.3025		-0.37219	-0.3025
-0.82148	-0.1773		-0.32188	-0.1773		-0.68485	-0.1773		-0.82148	-0.22582		-0.32188	-0.22582		-0.68485	-0.22582
-1.2931	-0.56484		-0.35585	-0.56484		-0.31839	-0.56484		-1.2931	-0.40536		-0.35585	-0.40536		-0.31839	-0.40536
-0.93063	-0.71039		-0.4335	-0.71039		-0.29917	-0.71039		-0.93063	-0.36854		-0.4335	-0.36854		-0.29917	-0.36854
-1.34791	-0.4549		-0.25544	-0.4549		-0.44814	-0.4549		-1.34791	-0.12605		-0.25544	-0.12605		-0.44814	-0.12605
-0.73116	-0.16897		-0.3221	-0.16897		-0.42384	-0.16897		-0.73116	-0.26233		-0.3221	-0.26233		-0.42384	-0.26233
-1.03082	-0.58377		-0.6124	-0.58377		-0.51689	-0.58377		-1.03082	-0.29971		-0.6124	-0.29971		-0.51689	-0.29971
-0.72837	-0.14476		-0.57309	-0.14476		-0.48166	-0.14476		-0.72837	-0.22611		-0.57309	-0.22611		-0.48166	-0.22611
-0.83329	-0.11449		-0.54969	-0.11449		-0.23069	-0.11449		-0.83329	-0.24566		-0.54969	-0.24566		-0.23069	-0.24566
-0.93367	-0.30683		-0.27576	-0.30683		-0.47056	-0.30683		-0.93367	-0.25142		-0.27576	-0.25142		-0.47056	-0.25142
-1.25093	-0.64509		-0.50685	-0.64509		-0.53935	-0.64509		-1.25093	-0.28076		-0.50685	-0.28076		-0.53935	-0.28076
-0.71228	0.057497		-0.13927	0.057497		-0.2229	0.057497		-0.71228	-0.04958		-0.13927	-0.04958		-0.2229	-0.04958
-0.8986	0.034714		-0.4513	0.034714		-0.43251	0.034714		-0.8986	-0.13372		-0.4513	-0.13372		-0.43251	-0.13372
-0.61713	-0.26306		-0.61245	-0.26306		-0.02425	-0.26306		-0.61713	-0.12004		-0.61245	-0.12004		-0.02425	-0.12004
-0.87424	-0.19251		-0.3084	-0.19251		-0.52427	-0.19251		-0.87424	-0.42595		-0.3084	-0.42595		-0.52427	-0.42595
-0.67756	-0.01513		-0.52418	-0.01513		-0.2692	-0.01513		-0.67756	-0.07953		-0.52418	-0.07953		-0.2692	-0.07953
-1.22117	0.169526		-0.54417	0.169526		-0.40304	0.169526		-1.22117	-0.30369		-0.54417	-0.30369		-0.40304	-0.30369
-1.20102	-0.94671		-0.33194	-0.94671		-0.23202	-0.94671		-1.20102	-0.24234		-0.33194	-0.24234		-0.23202	-0.24234
-1.12863	-0.40993		-0.43711	-0.40993		-0.34181	-0.40993		-1.12863	-0.33744		-0.43711	-0.33744		-0.34181	-0.33744
-0.25098	-0.38389		-0.53298	-0.38389		-0.15466	-0.38389		-0.25098	-0.29859		-0.53298	-0.29859		-0.15466	-0.29859
-0.77495	-0.23211		-0.25662	-0.23211		-0.55776	-0.23211		-0.77495	-0.26331		-0.25662	-0.26331		-0.55776	-0.26331
-0.98371	-0.34919		0.142906	-0.34919		-0.10146	-0.34919		-0.98371	-0.16255		0.142906	-0.16255		-0.10146	-0.16255
-1.28556	0.030955		-0.28433	0.030955		-0.44713	0.030955		-1.28556	-0.21201		-0.28433	-0.21201		-0.44713	-0.21201
-0.6319	-0.06129		-0.47168	-0.06129		-0.3331	-0.06129		-0.6319	-0.35051		-0.47168	-0.35051		-0.3331	-0.35051
-0.80523	-0.07074		-0.14353	-0.07074		-0.43073	-0.07074		-0.80523	-0.02533		-0.14353	-0.02533		-0.43073	-0.02533
-0.8907	0.014091		-0.34878	0.014091		-0.80751	0.014091		-0.8907	-0.03783		-0.34878	-0.03783		-0.80751	-0.03783
-1.52354	-0.65541		-0.53764	-0.65541		-0.55714	-0.65541		-1.52354	-0.31004		-0.53764	-0.31004		-0.55714	-0.31004
-0.43245	-0.00805		-0.42595	-0.00805		-0.18803	-0.00805		-0.43245	-0.16248		-0.42595	-0.16248		-0.18803	-0.16248
-0.7731	-0.19936		-0.29698	-0.19936		-0.38274	-0.19936		-0.7731	-0.30009		-0.29698	-0.30009		-0.38274	-0.30009
-1.19624	-0.13733		-0.90613	-0.13733		-0.24146	-0.13733		-1.19624	-0.41059		-0.90613	-0.41059		-0.24146	-0.41059
-0.57836	-0.07782		-0.44169	-0.07782		-0.21782	-0.07782		-0.57836	-0.25111		-0.44169	-0.25111		-0.21782	-0.25111
-0.88798	0.009516		-0.31212	0.009516		-0.18839	0.009516		-0.88798	-0.26355		-0.31212	-0.26355		-0.18839	-0.26355
-0.90541	-0.18794		-0.42236	-0.18794		-0.2882	-0.18794		-0.90541	-0.2789		-0.42236	-0.2789		-0.2882	-0.2789
-0.60446	-0.4256		-0.14382	-0.4256		-0.22852	-0.4256		-0.60446	-0.27375		-0.14382	-0.27375		-0.22852	-0.27375
-0.6806	0.092028		-0.29828	0.092028		-0.26261	0.092028		-0.6806	-0.20192		-0.29828	-0.20192		-0.26261	-0.20192
-0.82775	-0.42119		-0.29673	-0.42119		-0.4306	-0.42119		-0.82775	-0.37253		-0.29673	-0.37253		-0.4306	-0.37253
-0.72965	-0.66935		-0.30064	-0.66935		-0.13	-0.66935		-0.72965	-0.28935		-0.30064	-0.28935		-0.13	-0.28935
-1.20704	-0.56845		-0.27635	-0.56845		-0.1443	-0.56845		-1.20704	-0.30953		-0.27635	-0.30953		-0.1443	-0.30953
-0.57295	-0.26245		-0.41606	-0.26245		-0.31681	-0.26245		-0.57295	-0.21293		-0.41606	-0.21293		-0.31681	-0.21293
-1.0984	-0.07448		0.148226	-0.07448		-0.46117	-0.07448		-1.0984	-0.20384		0.148226	-0.20384		-0.46117	-0.20384
-1.06158	-0.39273		-0.30263	-0.39273		-0.77545	-0.39273		-1.06158	-0.55697		-0.30263	-0.55697		-0.77545	-0.55697
-1.38023	-0.71599		-0.26485	-0.71599		-0.57032	-0.71599		-1.38023	-0.18098		-0.26485	-0.18098		-0.57032	-0.18098
-0.85082	-0.24261		-0.42162	-0.24261		-0.38663	-0.24261		-0.85082	-0.23211		-0.42162	-0.23211		-0.38663	-0.23211
-0.66402	-0.24837		-0.45275	-0.24837		-0.3445	-0.24837		-0.66402	-0.28027		-0.45275	-0.28027		-0.3445	-0.28027
-1.24986	-0.58021		-0.39892	-0.58021		-0.35413	-0.58021		-1.24986	-0.42374		-0.39892	-0.42374		-0.35413	-0.42374
-0.47695	-0.15088		-0.13661	-0.15088		-0.28074	-0.15088		-0.47695	-0.2099		-0.13661	-0.2099		-0.28074	-0.2099
-0.53694	-0.02007		-0.51543	-0.02007		-0.21574	-0.02007		-0.53694	-0.26585		-0.51543	-0.26585		-0.21574	-0.26585
-0.99575	0.047796		-0.33809	0.047796		-0.02163	0.047796		-0.99575	-0.09476		-0.33809	-0.09476		-0.02163	-0.09476
-1.03722	-0.1396		-0.25248	-0.1396		-0.48975	-0.1396		-1.03722	-0.47814		-0.25248	-0.47814		-0.48975	-0.47814
-0.62811	-0.17408		-0.36097	-0.17408		-0.31013	-0.17408		-0.62811	-0.15567		-0.36097	-0.15567		-0.31013	-0.15567
-1.11279	-0.54688		-0.41779	-0.54688		-0.20095	-0.54688		-1.11279	-0.40958		-0.41779	-0.40958		-0.20095	-0.40958
-0.57284	0.165371		-0.0775	0.165371		0.010425	0.165371		-0.57284	-0.31125		-0.0775	-0.31125		0.010425	-0.31125
-0.90713	-0.04779		-0.42046	-0.04779		-0.27495	-0.04779		-0.90713	-0.08235		-0.42046	-0.08235		-0.27495	-0.08235
-0.91126	-0.07183		-0.49445	-0.07183		-0.29905	-0.07183		-0.91126	-0.1533		-0.49445	-0.1533		-0.29905	-0.1533
-0.78373	-0.12211		-0.30307	-0.12211		-0.3198	-0.12211		-0.78373	-0.25321		-0.30307	-0.25321		-0.3198	-0.25321
-0.95801	-0.13816		-0.11493	-0.13816		-0.33362	-0.13816		-0.95801	-0.23307		-0.11493	-0.23307		-0.33362	-0.23307
-0.78459	-0.05476		-0.25992	-0.05476		-0.34661	-0.05476		-0.78459	-0.23527		-0.25992	-0.23527		-0.34661	-0.23527
-0.76843	-0.13951		-0.49509	-0.13951		-0.30304	-0.13951		-0.76843	-0.21601		-0.49509	-0.21601		-0.30304	-0.21601
-1.06712	-0.06094		-0.31862	-0.06094		-0.69139	-0.06094		-1.06712	-0.38457		-0.31862	-0.38457		-0.69139	-0.38457
-0.81177	-0.7667		-0.49598	-0.7667		-0.29955	-0.7667		-0.81177	-0.16412		-0.49598	-0.16412		-0.29955	-0.16412
-0.97033	0.021872		-0.3008	0.021872		-0.47708	0.021872		-0.97033	-0.18028		-0.3008	-0.18028		-0.47708	-0.18028
-1.01693	-0.12768		-0.21806	-0.12768		-0.32435	-0.12768		-1.01693	-0.24742		-0.21806	-0.24742		-0.32435	-0.24742
-1.14592	-0.02203		-0.25071	-0.02203		-0.35166	-0.02203		-1.14592	-0.1968		-0.25071	-0.1968		-0.35166	-0.1968
-0.15523	-0.21123		-0.28936	-0.21123		-0.00665	-0.21123		-0.15523	-0.28414		-0.28936	-0.28414		-0.00665	-0.28414
-1.18936	-0.44796		-0.47671	-0.44796		-0.53554	-0.44796		-1.18936	-0.36318		-0.47671	-0.36318		-0.53554	-0.36318
-0.62515	-0.51577		-0.17437	-0.51577		-0.40654	-0.51577		-0.62515	-0.20324		-0.17437	-0.20324		-0.40654	-0.20324
-0.70848	-0.05029		-0.30081	-0.05029		-0.2614	-0.05029		-0.70848	-0.55769		-0.30081	-0.55769		-0.2614	-0.55769
-1.27385	0.019399		-0.32551	0.019399		-0.41332	0.019399		-1.27385	-0.41371		-0.32551	-0.41371		-0.41332	-0.41371
-0.45209	-0.2542		-0.78184	-0.2542		-0.55194	-0.2542		-0.45209	-0.58599		-0.78184	-0.58599		-0.55194	-0.58599
-0.60762	-0.12426		-0.20721	-0.12426		-0.21771	-0.12426		-0.60762	-0.39807		-0.20721	-0.39807		-0.21771	-0.39807
-0.84171	-0.0892		-0.46647	-0.0892		-0.35115	-0.0892		-0.84171	-0.25571		-0.46647	-0.25571		-0.35115	-0.25571
-0.05082	-0.56728		-0.48085	-0.56728		-0.10905	-0.56728		-0.05082	-0.1651		-0.48085	-0.1651		-0.10905	-0.1651
-0.49269	-0.43549		-0.13584	-0.43549		-0.17586	-0.43549		-0.49269	-0.08147		-0.13584	-0.08147		-0.17586	-0.08147
-0.55693	-0.08565		-0.35127	-0.08565		0.048752	-0.08565		-0.55693	-0.20143		-0.35127	-0.20143		0.048752	-0.20143
-0.49439	-0.39486		-0.49602	-0.39486		-0.1995	-0.39486		-0.49439	-0.20506		-0.49602	-0.20506		-0.1995	-0.20506
-0.35608	-0.17207		-0.38633	-0.17207		-0.11082	-0.17207		-0.35608	-0.20364		-0.38633	-0.20364		-0.11082	-0.20364
-0.63571	-0.54075		-0.32784	-0.54075		-0.11139	-0.54075		-0.63571	-0.16458		-0.32784	-0.16458		-0.11139	-0.16458
-0.78215	-0.08556		-0.34237	-0.08556		-0.32159	-0.08556		-0.78215	-0.18753		-0.34237	-0.18753		-0.32159	-0.18753
-1.11786	-0.00456		-0.12342	-0.00456		-0.23628	-0.00456		-1.11786	-0.15388		-0.12342	-0.15388		-0.23628	-0.15388
-0.89553	-0.41842		-0.31614	-0.41842		-0.58204	-0.41842		-0.89553	-0.22862		-0.31614	-0.22862		-0.58204	-0.22862
-1.21451	-0.41715		-0.5166	-0.41715		-0.31009	-0.41715		-1.21451	-0.13282		-0.5166	-0.13282		-0.31009	-0.13282
-1.11231	-0.26975		-0.40875	-0.26975		-0.40471	-0.26975		-1.11231	-0.23912		-0.40875	-0.23912		-0.40471	-0.23912
-0.93766	0.05546		-0.33433	0.05546		-0.0698	0.05546		-0.93766	-0.16633		-0.33433	-0.16633		-0.0698	-0.16633
-0.56902	-0.07278		-0.40028	-0.07278		-0.04154	-0.07278		-0.56902	-0.24395		-0.40028	-0.24395		-0.04154	-0.24395
-0.42248	-0.08864		-0.5396	-0.08864		-0.0733	-0.08864		-0.42248	-0.32104		-0.5396	-0.32104		-0.0733	-0.32104
-0.69201	0.081813		-0.40401	0.081813		-0.34368	0.081813		-0.69201	-0.31127		-0.40401	-0.31127		-0.34368	-0.31127
-0.92778	-0.29583		-0.2561	-0.29583		-0.24334	-0.29583		-0.92778	-0.28726		-0.2561	-0.28726		-0.24334	-0.28726
-1.0905	-0.32338		-0.33876	-0.32338		-0.60735	-0.32338		-1.0905	-0.31772		-0.33876	-0.31772		-0.60735	-0.31772
-0.93109	-0.4054		-0.30278	-0.4054		-0.38949	-0.4054		-0.93109	-0.22052		-0.30278	-0.22052		-0.38949	-0.22052
-0.86237	-0.67081		-0.12109	-0.67081		-0.27776	-0.67081		-0.86237	-0.35374		-0.12109	-0.35374		-0.27776	-0.35374
-0.71105	0.071795		-0.22545	0.071795		-0.35886	0.071795		-0.71105	-0.30543		-0.22545	-0.30543		-0.35886	-0.30543
-0.77847	-0.17906		-0.374	-0.17906		-0.43081	-0.17906		-0.77847	-0.20952		-0.374	-0.20952		-0.43081	-0.20952
-1.16284	-0.43408		-0.38617	-0.43408		-0.62186	-0.43408		-1.16284	-0.16529		-0.38617	-0.16529		-0.62186	-0.16529
-0.88041	-0.18959		-0.5121	-0.18959		-0.48976	-0.18959		-0.88041	-0.27421		-0.5121	-0.27421		-0.48976	-0.27421
-0.94871	-0.01712		-0.12561	-0.01712		-0.03782	-0.01712		-0.94871	-0.07373		-0.12561	-0.07373		-0.03782	-0.07373
-0.99751	-0.62572		-0.45038	-0.62572		-0.28682	-0.62572		-0.99751	-0.17557		-0.45038	-0.17557		-0.28682	-0.17557
-0.92557	-0.17763		-0.65982	-0.17763		-0.71402	-0.17763		-0.92557	-0.39292		-0.65982	-0.39292		-0.71402	-0.39292
-0.77241	-0.03784		-0.33086	-0.03784		-0.3149	-0.03784		-0.77241	-0.20171		-0.33086	-0.20171		-0.3149	-0.20171
-0.86411	0.039147		-0.5192	0.039147		-0.28779	0.039147		-0.86411	-0.1892		-0.5192	-0.1892		-0.28779	-0.1892
-0.73298	-0.05306		-0.4186	-0.05306		-0.33387	-0.05306		-0.73298	-0.21591		-0.4186	-0.21591		-0.33387	-0.21591
-0.6621	0.000801		-0.64159	0.000801		-0.57097	0.000801		-0.6621	-0.18428		-0.64159	-0.18428		-0.57097	-0.18428
-0.59179	-0.82513		-0.32093	-0.82513		-0.26987	-0.82513		-0.59179	-0.20123		-0.32093	-0.20123		-0.26987	-0.20123
-1.08075	-0.08288		-0.26608	-0.08288		-0.39498	-0.08288		-1.08075	-0.13558		-0.26608	-0.13558		-0.39498	-0.13558
-0.57883	0.019319		-0.08379	0.019319		-0.4809	0.019319		-0.57883	-0.33509		-0.08379	-0.33509		-0.4809	-0.33509
-0.82629	-0.01815		-0.68726	-0.01815		-0.86939	-0.01815		-0.82629	-0.35588		-0.68726	-0.35588		-0.86939	-0.35588
-1.32602	-0.11544		-0.4738	-0.11544		-0.51252	-0.11544		-1.32602	-0.20537		-0.4738	-0.20537		-0.51252	-0.20537
-0.99376	-0.12451		-0.45888	-0.12451		-0.22481	-0.12451		-0.99376	-0.35332		-0.45888	-0.35332		-0.22481	-0.35332
-1.13595	-0.60899		-0.67456	-0.60899		-0.41386	-0.60899		-1.13595	-0.11242		-0.67456	-0.11242		-0.41386	-0.11242
-0.62321	-0.44334		-0.50113	-0.44334		-0.18527	-0.44334		-0.62321	-0.18415		-0.50113	-0.18415		-0.18527	-0.18415
-1.05546	-0.01963		-0.36347	-0.01963		-0.2902	-0.01963		-1.05546	-0.32389		-0.36347	-0.32389		-0.2902	-0.32389
-0.90504	0.132005		-0.44633	0.132005		-0.37431	0.132005		-0.90504	-0.1965		-0.44633	-0.1965		-0.37431	-0.1965
-0.39808	0.025458		-0.31997	0.025458		-0.31206	0.025458		-0.39808	-0.14609		-0.31997	-0.14609		-0.31206	-0.14609
-0.25467	0.000537		-0.36197	0.000537		-0.17233	0.000537		-0.25467	-0.36582		-0.36197	-0.36582		-0.17233	-0.36582
-0.58042	-0.19682		-0.23176	-0.19682		-0.16936	-0.19682		-0.58042	-0.18461		-0.23176	-0.18461		-0.16936	-0.18461
-0.61831	0.010766		-0.32339	0.010766		-0.33222	0.010766		-0.61831	-0.3519		-0.32339	-0.3519		-0.33222	-0.3519
-0.89737	-0.21716		-0.4182	-0.21716		-0.3015	-0.21716		-0.89737	-0.25867		-0.4182	-0.25867		-0.3015	-0.25867
-0.55612	-0.20063		-0.20003	-0.20063		-0.05473	-0.20063		-0.55612	-0.44876		-0.20003	-0.44876		-0.05473	-0.44876
-1.01094	0.051879		-0.44424	0.051879		-0.27698	0.051879		-1.01094	-0.15909		-0.44424	-0.15909		-0.27698	-0.15909
-1.01645	-0.08804		-0.39803	-0.08804		-0.19139	-0.08804		-1.01645	-0.19291		-0.39803	-0.19291		-0.19139	-0.19291
-0.65991	-0.05587		-0.45971	-0.05587		-0.15641	-0.05587		-0.65991	-0.1036		-0.45971	-0.1036		-0.15641	-0.1036
-1.50589	0.001998		-0.2379	0.001998		-0.47614	0.001998		-1.50589	-0.4602		-0.2379	-0.4602		-0.47614	-0.4602
-0.63267	-0.1594		-0.72378	-0.1594		-0.0258	-0.1594		-0.63267	-0.20954		-0.72378	-0.20954		-0.0258	-0.20954
-1.08623	-0.1134		-0.31357	-0.1134		-0.22804	-0.1134		-1.08623	-0.18056		-0.31357	-0.18056		-0.22804	-0.18056
-0.6013	-0.08142		-0.28101	-0.08142		-0.19215	-0.08142		-0.6013	-0.17652		-0.28101	-0.17652		-0.19215	-0.17652
-0.96981	-0.04509		-0.30057	-0.04509		-0.19258	-0.04509		-0.96981	-0.09356		-0.30057	-0.09356		-0.19258	-0.09356
-0.92399	-0.02947		-0.50925	-0.02947		-0.29997	-0.02947		-0.92399	-0.30156		-0.50925	-0.30156		-0.29997	-0.30156
-0.78246	0.024817		-0.2501	0.024817		-0.41633	0.024817		-0.78246	-0.35042		-0.2501	-0.35042		-0.41633	-0.35042
-0.75084	-0.36461		-0.69806	-0.36461		-0.46821	-0.36461		-0.75084	-0.21154		-0.69806	-0.21154		-0.46821	-0.21154
-0.44722	-0.05031		-0.56974	-0.05031		-0.10421	-0.05031		-0.44722	-0.2932		-0.56974	-0.2932		-0.10421	-0.2932
-1.16	-0.43195		-0.21865	-0.43195		-0.36595	-0.43195		-1.16	-0.43347		-0.21865	-0.43347		-0.36595	-0.43347
-0.5758	-0.36566		-0.56161	-0.36566		-0.26318	-0.36566		-0.5758	-0.19159		-0.56161	-0.19159		-0.26318	-0.19159
-1.01175	-0.28588		-0.38354	-0.28588		-0.40839	-0.28588		-1.01175	-0.0365		-0.38354	-0.0365		-0.40839	-0.0365
-0.91718	0.009588		-0.36944	0.009588		-0.2881	0.009588		-0.91718	-0.12131		-0.36944	-0.12131		-0.2881	-0.12131
-0.87279	-0.015		-0.4317	-0.015		-0.27354	-0.015		-0.87279	-0.28631		-0.4317	-0.28631		-0.27354	-0.28631
-0.55843	-0.27007		-0.39678	-0.27007		-0.16564	-0.27007		-0.55843	-0.28364		-0.39678	-0.28364		-0.16564	-0.28364
-1.15768	-0.20961		-0.39789	-0.20961		-0.34613	-0.20961		-1.15768	-0.25844		-0.39789	-0.25844		-0.34613	-0.25844
-0.50148	-0.24022		-0.37969	-0.24022		-0.26979	-0.24022		-0.50148	-0.1705		-0.37969	-0.1705		-0.26979	-0.1705
-0.60795	-0.29909		-0.16281	-0.29909		-0.29792	-0.29909		-0.60795	-0.38108		-0.16281	-0.38108		-0.29792	-0.38108
-0.88833	-0.68533		-0.3185	-0.68533		-0.77587	-0.68533		-0.88833	-0.41864		-0.3185	-0.41864		-0.77587	-0.41864
-0.83399	-0.09222		-0.44394	-0.09222		-0.14926	-0.09222		-0.83399	-0.16046		-0.44394	-0.16046		-0.14926	-0.16046
-0.50638	0.102749		-0.63551	0.102749		-0.60191	0.102749		-0.50638	-0.14199		-0.63551	-0.14199		-0.60191	-0.14199
-0.6617	-0.34974		-0.43502	-0.34974		-0.33461	-0.34974		-0.6617	-0.30742		-0.43502	-0.30742		-0.33461	-0.30742
-0.62908	-0.23408		-0.30921	-0.23408		-0.27684	-0.23408		-0.62908	-0.18138		-0.30921	-0.18138		-0.27684	-0.18138
-0.91135	-0.02643		-0.13324	-0.02643		-0.25174	-0.02643		-0.91135	-0.16366		-0.13324	-0.16366		-0.25174	-0.16366
-0.75946	-0.15675		-0.19354	-0.15675		-0.66571	-0.15675		-0.75946	-0.43987		-0.19354	-0.43987		-0.66571	-0.43987
-0.53502	0.044442		-0.46613	0.044442		-0.32978	0.044442		-0.53502	-0.29688		-0.46613	-0.29688		-0.32978	-0.29688
-0.53363	-0.12056		-0.47102	-0.12056		-0.43831	-0.12056		-0.53363	-0.24793		-0.47102	-0.24793		-0.43831	-0.24793
-1.04796	-0.20887		-0.28008	-0.20887		-0.45675	-0.20887		-1.04796	-0.27786		-0.28008	-0.27786		-0.45675	-0.27786
-0.59038	0.074881		-0.21297	0.074881		-0.38791	0.074881		-0.59038	-0.15041		-0.21297	-0.15041		-0.38791	-0.15041
-0.69062	-0.05828		-0.30407	-0.05828		-0.32552	-0.05828		-0.69062	-0.22077		-0.30407	-0.22077		-0.32552	-0.22077
-1.24635	-0.13616		-0.40441	-0.13616		-0.2764	-0.13616		-1.24635	-0.42446		-0.40441	-0.42446		-0.2764	-0.42446
-0.54742	-0.00492		-0.21296	-0.00492		-0.52836	-0.00492		-0.54742	-0.08576		-0.21296	-0.08576		-0.52836	-0.08576
-0.67894	0.037671		-0.42453	0.037671		-0.32655	0.037671		-0.67894	-0.39104		-0.42453	-0.39104		-0.32655	-0.39104
-0.99457	-0.13967		-0.20725	-0.13967		-0.50448	-0.13967		-0.99457	-0.33684		-0.20725	-0.33684		-0.50448	-0.33684
-0.48174	-0.17729		-0.41685	-0.17729		-0.10697	-0.17729		-0.48174	-0.27107		-0.41685	-0.27107		-0.10697	-0.27107
-0.79848	-0.26704		-0.04632	-0.26704		-0.36798	-0.26704		-0.79848	-0.09936		-0.04632	-0.09936		-0.36798	-0.09936
-0.56381	0.012392		-0.32551	0.012392		-0.50172	0.012392		-0.56381	-0.36006		-0.32551	-0.36006		-0.50172	-0.36006
-0.72474	0.060883		-0.38979	0.060883		-0.21137	0.060883		-0.72474	-0.17627		-0.38979	-0.17627		-0.21137	-0.17627
-0.97506	-0.11218		-0.26328	-0.11218		-0.71586	-0.11218		-0.97506	-0.24411		-0.26328	-0.24411		-0.71586	-0.24411
-0.47323	-0.18613		-0.65126	-0.18613		-0.30165	-0.18613		-0.47323	-0.28703		-0.65126	-0.28703		-0.30165	-0.28703
-1.21168	0.103097		-0.52482	0.103097		-0.37259	0.103097		-1.21168	0.016922		-0.52482	0.016922		-0.37259	0.016922
-0.68666	0.073051		-0.10636	0.073051		-0.42569	0.073051		-0.68666	-0.12598		-0.10636	-0.12598		-0.42569	-0.12598
-1.24548	-0.08294		-0.29597	-0.08294		-0.60504	-0.08294		-1.24548	-0.30381		-0.29597	-0.30381		-0.60504	-0.30381
-1.46756	0.1997		-0.15829	0.1997		-0.37101	0.1997		-1.46756	-0.05203		-0.15829	-0.05203		-0.37101	-0.05203
-0.69064	-0.50214		-0.66852	-0.50214		0.069751	-0.50214		-0.69064	-0.28437		-0.66852	-0.28437		0.069751	-0.28437
-0.93148	-0.4007		-0.50628	-0.4007		-0.31917	-0.4007		-0.93148	-0.28288		-0.50628	-0.28288		-0.31917	-0.28288
-0.98903	-0.33556		-0.33991	-0.33556		-0.37398	-0.33556		-0.98903	-0.86262		-0.33991	-0.86262		-0.37398	-0.86262
-0.83773	-0.06395		0.087183	-0.06395		-0.41326	-0.06395		-0.83773	-0.40488		0.087183	-0.40488		-0.41326	-0.40488
-0.8855	-0.01378		-0.19161	-0.01378		-0.38402	-0.01378		-0.8855	-0.12524		-0.19161	-0.12524		-0.38402	-0.12524
-0.72771	-0.02867		-0.25584	-0.02867		-0.31528	-0.02867		-0.72771	-0.08235		-0.25584	-0.08235		-0.31528	-0.08235
-0.88914	-0.96483		-0.66102	-0.96483		-0.40077	-0.96483		-0.88914	-0.43239		-0.66102	-0.43239		-0.40077	-0.43239
-1.41902	0.056766		-0.13247	0.056766		-0.54152	0.056766		-1.41902	-0.1311		-0.13247	-0.1311		-0.54152	-0.1311
-0.6184	-0.0839		-0.14788	-0.0839		-0.18874	-0.0839		-0.6184	-0.26961		-0.14788	-0.26961		-0.18874	-0.26961
-0.88323	-0.20346		-0.42446	-0.20346		-0.51241	-0.20346		-0.88323	-0.23988		-0.42446	-0.23988		-0.51241	-0.23988
-0.67318	0.015903		-0.30455	0.015903		-0.438	0.015903		-0.67318	-0.19852		-0.30455	-0.19852		-0.438	-0.19852
-0.73067	-0.22718		-0.26655	-0.22718		-0.52667	-0.22718		-0.73067	-0.26705		-0.26655	-0.26705		-0.52667	-0.26705
-1.06959	-0.09977		-0.3547	-0.09977		-0.60558	-0.09977		-1.06959	-0.49077		-0.3547	-0.49077		-0.60558	-0.49077
-0.68958	-0.08677		-0.17281	-0.08677		-0.39513	-0.08677		-0.68958	-0.14981		-0.17281	-0.14981		-0.39513	-0.14981
-0.53105	-0.14083		-0.51959	-0.14083		-0.22941	-0.14083		-0.53105	-0.20185		-0.51959	-0.20185		-0.22941	-0.20185
-0.62611	-0.17524		-0.23538	-0.17524		-0.23734	-0.17524		-0.62611	-0.26149		-0.23538	-0.26149		-0.23734	-0.26149
-0.46127	0.061107		-0.2801	0.061107		-0.3016	0.061107		-0.46127	-0.006		-0.2801	-0.006		-0.3016	-0.006
-0.70096	0.134919		-0.71765	0.134919		-0.69381	0.134919		-0.70096	-0.19775		-0.71765	-0.19775		-0.69381	-0.19775
-1.3311	-0.07633		-0.27579	-0.07633		0.03935	-0.07633		-1.3311	-0.23202		-0.27579	-0.23202		0.03935	-0.23202
-1.16468	-0.90858		-0.455	-0.90858		-0.29239	-0.90858		-1.16468	-0.54637		-0.455	-0.54637		-0.29239	-0.54637
-0.84191	-0.37679		-0.35201	-0.37679		-0.50617	-0.37679		-0.84191	-0.21735		-0.35201	-0.21735		-0.50617	-0.21735
-0.53733	-0.54876		-0.23221	-0.54876		-0.26439	-0.54876		-0.53733	-0.23244		-0.23221	-0.23244		-0.26439	-0.23244
-0.24359	-0.0931		-0.44486	-0.0931		-0.23327	-0.0931		-0.24359	-0.24453		-0.44486	-0.24453		-0.23327	-0.24453
-0.98041	0.130387		-0.26617	0.130387		-0.4091	0.130387		-0.98041	-0.25178		-0.26617	-0.25178		-0.4091	-0.25178
-0.51491	-0.25423		-0.44232	-0.25423		-0.29054	-0.25423		-0.51491	-0.23024		-0.44232	-0.23024		-0.29054	-0.23024
-0.95647	-0.39164		-0.46915	-0.39164		-0.314	-0.39164		-0.95647	-0.41165		-0.46915	-0.41165		-0.314	-0.41165
-0.70478	0.204487		-0.31729	0.204487		0.015338	0.204487		-0.70478	0.032604		-0.31729	0.032604		0.015338	0.032604
-0.70678	0.158227		-0.31391	0.158227		-0.42718	0.158227		-0.70678	-0.18982		-0.31391	-0.18982		-0.42718	-0.18982
-0.88064	-0.46476		-0.2827	-0.46476		-0.45826	-0.46476		-0.88064	-0.27682		-0.2827	-0.27682		-0.45826	-0.27682
-0.5222	0.147181		-0.41198	0.147181		-0.29974	0.147181		-0.5222	-0.14972		-0.41198	-0.14972		-0.29974	-0.14972
-0.74712	-0.1358		-0.62154	-0.1358		-0.43244	-0.1358		-0.74712	-0.18889		-0.62154	-0.18889		-0.43244	-0.18889
-0.83425	-0.42478		-0.15711	-0.42478		-0.21151	-0.42478		-0.83425	-0.2797		-0.15711	-0.2797		-0.21151	-0.2797
-0.443	0.144154		-0.2275	0.144154		-0.17367	0.144154		-0.443	-0.30003		-0.2275	-0.30003		-0.17367	-0.30003
-1.38489	-0.00174		-0.27971	-0.00174		-0.3019	-0.00174		-1.38489	-0.24123		-0.27971	-0.24123		-0.3019	-0.24123
-0.75857	0.09377		-0.56155	0.09377		-0.43	0.09377		-0.75857	-0.29707		-0.56155	-0.29707		-0.43	-0.29707
-0.29462	-0.03715		-0.20663	-0.03715		-0.29608	-0.03715		-0.29462	-0.25963		-0.20663	-0.25963		-0.29608	-0.25963
-0.65188	0.068814		-0.15039	0.068814		-0.39475	0.068814		-0.65188	-0.18593		-0.15039	-0.18593		-0.39475	-0.18593
-1.31759	-0.02775		-0.51876	-0.02775		-0.66022	-0.02775		-1.31759	-0.25958		-0.51876	-0.25958		-0.66022	-0.25958
-0.39983	0.12528		-0.44965	0.12528		-0.16714	0.12528		-0.39983	-0.25823		-0.44965	-0.25823		-0.16714	-0.25823
-1.02767	-0.36115		-0.462	-0.36115		-0.10833	-0.36115		-1.02767	-0.27973		-0.462	-0.27973		-0.10833	-0.27973
-0.74634	-0.0825		-0.40515	-0.0825		-0.46013	-0.0825		-0.74634	-0.30412		-0.40515	-0.30412		-0.46013	-0.30412
-1.41105	-0.13886		-0.31085	-0.13886		-0.5412	-0.13886		-1.41105	-0.26235		-0.31085	-0.26235		-0.5412	-0.26235
-0.85995	-0.17646		-0.08253	-0.17646		-0.04402	-0.17646		-0.85995	-0.1609		-0.08253	-0.1609		-0.04402	-0.1609
-1.13708	-0.71477		-0.35368	-0.71477		-0.20009	-0.71477		-1.13708	-0.13449		-0.35368	-0.13449		-0.20009	-0.13449
-0.66504	-0.0385		-0.39502	-0.0385		-0.25702	-0.0385		-0.66504	-0.24294		-0.39502	-0.24294		-0.25702	-0.24294
-0.81017	0.037392		-0.29466	0.037392		-0.30999	0.037392		-0.81017	-0.334		-0.29466	-0.334		-0.30999	-0.334
-0.47025	-0.11672		-0.37524	-0.11672		-0.11371	-0.11672		-0.47025	-0.35102		-0.37524	-0.35102		-0.11371	-0.35102
-0.46866	-0.09663		-0.58175	-0.09663		-0.19158	-0.09663		-0.46866	-0.25392		-0.58175	-0.25392		-0.19158	-0.25392
-0.46346	0.067686		-0.33803	0.067686		-0.33021	0.067686		-0.46346	-0.26355		-0.33803	-0.26355		-0.33021	-0.26355
-0.6423	-0.03945		-0.49585	-0.03945		-0.50935	-0.03945		-0.6423	-0.19789		-0.49585	-0.19789		-0.50935	-0.19789
-0.30752	-0.08947		-0.66397	-0.08947		-0.23983	-0.08947		-0.30752	-0.40375		-0.66397	-0.40375		-0.23983	-0.40375
-0.98383	-0.03672		-0.39686	-0.03672		-0.14766	-0.03672		-0.98383	-0.35763		-0.39686	-0.35763		-0.14766	-0.35763
-0.64564	-0.28257		-0.4041	-0.28257		-0.13159	-0.28257		-0.64564	-0.32145		-0.4041	-0.32145		-0.13159	-0.32145
-0.63696	0.175722		-0.31395	0.175722		-0.46438	0.175722		-0.63696	-0.3664		-0.31395	-0.3664		-0.46438	-0.3664
-0.752	0.217775		-0.48999	0.217775		-0.3944	0.217775		-0.752	-0.27562		-0.48999	-0.27562		-0.3944	-0.27562
-0.81345	-0.33437		-0.40773	-0.33437		0.015796	-0.33437		-0.81345	-0.19384		-0.40773	-0.19384		0.015796	-0.19384
-1.02004	-0.41663		-0.21116	-0.41663		-0.60314	-0.41663		-1.02004	-0.18713		-0.21116	-0.18713		-0.60314	-0.18713
-1.5232	-1.3454		-0.42702	-1.3454		-0.41693	-1.3454		-1.5232	-0.41862		-0.42702	-0.41862		-0.41693	-0.41862
-0.95963	-0.28061		-0.49839	-0.28061		-0.65721	-0.28061		-0.95963	-0.60363		-0.49839	-0.60363		-0.65721	-0.60363
-0.50165	0.031603		-0.20926	0.031603		-0.24859	0.031603		-0.50165	-0.25483		-0.20926	-0.25483		-0.24859	-0.25483
-0.71935	-0.05336		-0.38645	-0.05336		-0.52582	-0.05336		-0.71935	-0.35715		-0.38645	-0.35715		-0.52582	-0.35715
-1.04081	-0.48135		-0.34217	-0.48135		-0.26662	-0.48135		-1.04081	-0.37496		-0.34217	-0.37496		-0.26662	-0.37496
-0.43604	-0.31759		-0.61309	-0.31759		-0.05956	-0.31759		-0.43604	-0.38479		-0.61309	-0.38479		-0.05956	-0.38479
-0.86703	-0.60267		-0.26207	-0.60267		-0.46487	-0.60267		-0.86703	-0.24692		-0.26207	-0.24692		-0.46487	-0.24692
-1.04404	-0.2213		-0.4655	-0.2213		-0.34498	-0.2213		-1.04404	-0.37792		-0.4655	-0.37792		-0.34498	-0.37792
-0.86685	-0.09513		-0.692	-0.09513		-0.36744	-0.09513		-0.86685	-0.21779		-0.692	-0.21779		-0.36744	-0.21779
-0.92314	-0.48572		-0.22538	-0.48572		-0.28019	-0.48572		-0.92314	-1.01461		-0.22538	-1.01461		-0.28019	-1.01461
-0.87761	-0.20803		-0.44005	-0.20803		-0.15364	-0.20803		-0.87761	-0.27838		-0.44005	-0.27838		-0.15364	-0.27838
-0.73622	-0.47405		-0.28517	-0.47405		-0.36666	-0.47405		-0.73622	-0.49087		-0.28517	-0.49087		-0.36666	-0.49087
-0.87125	-0.00329		-0.4142	-0.00329		-0.20991	-0.00329		-0.87125	-0.15304		-0.4142	-0.15304		-0.20991	-0.15304
-0.36593	-0.53952		-0.32675	-0.53952		-0.29737	-0.53952		-0.36593	-0.2116		-0.32675	-0.2116		-0.29737	-0.2116
-0.67672	-0.12606		-0.29532	-0.12606		-0.19594	-0.12606		-0.67672	-0.27223		-0.29532	-0.27223		-0.19594	-0.27223
-0.83968	-0.39547		-0.6017	-0.39547		-0.16668	-0.39547		-0.83968	-0.39874		-0.6017	-0.39874		-0.16668	-0.39874
-1.09915	-0.00686		-0.58403	-0.00686		-0.42039	-0.00686		-1.09915	-0.30759		-0.58403	-0.30759		-0.42039	-0.30759
-0.53119	-0.08805		-0.32137	-0.08805		-0.32099	-0.08805		-0.53119	-0.40809		-0.32137	-0.40809		-0.32099	-0.40809
-1.30171	-0.47825		-0.27478	-0.47825		-0.34702	-0.47825		-1.30171	-0.45768		-0.27478	-0.45768		-0.34702	-0.45768
-1.52979	-0.79436		-0.58404	-0.79436		-0.64999	-0.79436		-1.52979	-0.364		-0.58404	-0.364		-0.64999	-0.364
-0.60804	0.0786		-0.12206	0.0786		-0.18685	0.0786		-0.60804	-0.14327		-0.12206	-0.14327		-0.18685	-0.14327
-0.92857	-0.12465		-0.55752	-0.12465		-0.73675	-0.12465		-0.92857	-0.22813		-0.55752	-0.22813		-0.73675	-0.22813
-1.118	-0.08921		-0.48611	-0.08921		-0.41037	-0.08921		-1.118	-0.28974		-0.48611	-0.28974		-0.41037	-0.28974
-0.41692	-0.11178		-0.33198	-0.11178		-0.13629	-0.11178		-0.41692	-0.20178		-0.33198	-0.20178		-0.13629	-0.20178
-1.18064	0.071998		-0.39253	0.071998		-0.47863	0.071998		-1.18064	-0.34343		-0.39253	-0.34343		-0.47863	-0.34343
-1.28105	-0.27549		-0.68008	-0.27549		-0.35169	-0.27549		-1.28105	-0.29253		-0.68008	-0.29253		-0.35169	-0.29253
-0.70196	0.002978		0.321414	0.002978		-0.52401	0.002978		-0.70196	-0.08888		0.321414	-0.08888		-0.52401	-0.08888
-1.40874	-0.3639		-0.62788	-0.3639		-0.5583	-0.3639		-1.40874	-0.07181		-0.62788	-0.07181		-0.5583	-0.07181
-0.71906	-0.02274		-0.33712	-0.02274		-0.27467	-0.02274		-0.71906	-0.35189		-0.33712	-0.35189		-0.27467	-0.35189
-0.62808	-0.56862		-0.28872	-0.56862		-0.55898	-0.56862		-0.62808	-0.26831		-0.28872	-0.26831		-0.55898	-0.26831
-0.75929	-0.12199		-0.28065	-0.12199		-0.30128	-0.12199		-0.75929	-0.19669		-0.28065	-0.19669		-0.30128	-0.19669
-0.73884	-0.15513		-0.65513	-0.15513		-0.43849	-0.15513		-0.73884	-0.4663		-0.65513	-0.4663		-0.43849	-0.4663
-0.89097	-0.062		-0.58116	-0.062		-0.18617	-0.062		-0.89097	-0.22542		-0.58116	-0.22542		-0.18617	-0.22542
-0.64295	-0.56319		-0.33698	-0.56319		-0.2807	-0.56319		-0.64295	-0.26598		-0.33698	-0.26598		-0.2807	-0.26598
-0.89332	-0.4454		-0.36415	-0.4454		-0.39291	-0.4454		-0.89332	-0.63801		-0.36415	-0.63801		-0.39291	-0.63801
-1.03329	-0.12561		-0.35661	-0.12561		-0.28234	-0.12561		-1.03329	-0.17066		-0.35661	-0.17066		-0.28234	-0.17066
-0.72876	-0.27957		-0.32369	-0.27957		-0.17879	-0.27957		-0.72876	-0.30437		-0.32369	-0.30437		-0.17879	-0.30437
-0.99855	-0.2037		-0.6379	-0.2037		-0.52791	-0.2037		-0.99855	-0.46748		-0.6379	-0.46748		-0.52791	-0.46748
-0.61844	-0.16213		-0.3905	-0.16213		0.032022	-0.16213		-0.61844	-0.56857		-0.3905	-0.56857		0.032022	-0.56857
-0.6676	-0.2027		-0.40481	-0.2027		-0.42042	-0.2027		-0.6676	-0.34004		-0.40481	-0.34004		-0.42042	-0.34004
-0.49259	0.083134		-0.64129	0.083134		-0.37329	0.083134		-0.49259	-0.08222		-0.64129	-0.08222		-0.37329	-0.08222
-1.17028	-0.78432		-0.3753	-0.78432		-0.34268	-0.78432		-1.17028	-0.16897		-0.3753	-0.16897		-0.34268	-0.16897
-0.97405	-0.28095		-0.38057	-0.28095		-0.26417	-0.28095		-0.97405	-0.55044		-0.38057	-0.55044		-0.26417	-0.55044
-0.46186	-0.14023		-0.26347	-0.14023		-0.28346	-0.14023		-0.46186	-0.35537		-0.26347	-0.35537		-0.28346	-0.35537
-0.27807	-0.39508		-0.35819	-0.39508		-0.36608	-0.39508		-0.27807	-0.3924		-0.35819	-0.3924		-0.36608	-0.3924
-1.35301	-0.97604		-0.33107	-0.97604		-0.69512	-0.97604		-1.35301	-0.73049		-0.33107	-0.73049		-0.69512	-0.73049
-0.69939	-0.16145		-0.42567	-0.16145		-0.2942	-0.16145		-0.69939	-0.47428		-0.42567	-0.47428		-0.2942	-0.47428
-0.7751	0.04947		-0.27978	0.04947		-0.35315	0.04947		-0.7751	-0.45982		-0.27978	-0.45982		-0.35315	-0.45982
-0.70643	-0.15844		-0.56029	-0.15844		-0.01329	-0.15844		-0.70643	-0.46162		-0.56029	-0.46162		-0.01329	-0.46162
-1.02341	-0.23971		-0.35265	-0.23971		-0.30701	-0.23971		-1.02341	-0.72903		-0.35265	-0.72903		-0.30701	-0.72903
-0.89257	-0.22683		-0.97548	-0.22683		-0.5151	-0.22683		-0.89257	-0.14616		-0.97548	-0.14616		-0.5151	-0.14616
-0.78731	-0.67109		-0.57795	-0.67109		-0.50711	-0.67109		-0.78731	-0.35153		-0.57795	-0.35153		-0.50711	-0.35153
-0.81007	-0.20651		-0.2967	-0.20651		-0.42276	-0.20651		-0.81007	-0.31972		-0.2967	-0.31972		-0.42276	-0.31972
-0.60601	-0.29936		-0.3064	-0.29936		-0.15483	-0.29936		-0.60601	-0.69916		-0.3064	-0.69916		-0.15483	-0.69916
-0.44858	-0.58893		-0.36041	-0.58893		-0.29684	-0.58893		-0.44858	-0.42699		-0.36041	-0.42699		-0.29684	-0.42699
-0.61373	-0.04387		-0.38874	-0.04387		-0.12825	-0.04387		-0.61373	-0.34506		-0.38874	-0.34506		-0.12825	-0.34506
-0.62063	-0.03813		-0.43681	-0.03813		-0.54014	-0.03813		-0.62063	-0.24301		-0.43681	-0.24301		-0.54014	-0.24301
-0.80594	-0.03818		-0.50423	-0.03818		-0.5511	-0.03818		-0.80594	-0.20498		-0.50423	-0.20498		-0.5511	-0.20498
-0.94485	0.009993		-0.46516	0.009993		-0.71355	0.009993		-0.94485	-0.12024		-0.46516	-0.12024		-0.71355	-0.12024
-0.69883	0.114627		-0.34319	0.114627		0.281863	0.114627		-0.69883	-0.21056		-0.34319	-0.21056		0.281863	-0.21056
-0.99806	-0.25545		0.114596	-0.25545		-0.4471	-0.25545		-0.99806	-0.13388		0.114596	-0.13388		-0.4471	-0.13388
-1.2898	-0.08705		-0.48363	-0.08705		-0.41861	-0.08705		-1.2898	-0.28275		-0.48363	-0.28275		-0.41861	-0.28275
-0.42211	-0.22047		-0.42267	-0.22047		-0.36215	-0.22047		-0.42211	-0.19594		-0.42267	-0.19594		-0.36215	-0.19594
-1.07807	-0.06878		-0.00075	-0.06878		0.069911	-0.06878		-1.07807	-0.19859		-0.00075	-0.19859		0.069911	-0.19859
-0.83571	-0.3268		-0.4814	-0.3268		-0.41611	-0.3268		-0.83571	-0.05929		-0.4814	-0.05929		-0.41611	-0.05929
-1.07833	-0.29718		-0.1968	-0.29718		-0.46303	-0.29718		-1.07833	-0.60653		-0.1968	-0.60653		-0.46303	-0.60653
-1.58368	-0.26947		-0.42946	-0.26947		-0.39774	-0.26947		-1.58368	-0.30574		-0.42946	-0.30574		-0.39774	-0.30574
-0.88681	-0.0023		-0.88289	-0.0023		-0.21761	-0.0023		-0.88681	-0.1292		-0.88289	-0.1292		-0.21761	-0.1292
-0.53321	0.093507		-0.50955	0.093507		-0.37025	0.093507		-0.53321	-0.08504		-0.50955	-0.08504		-0.37025	-0.08504
-0.41028	-0.14159		-0.36325	-0.14159		-0.54475	-0.14159		-0.41028	-0.2614		-0.36325	-0.2614		-0.54475	-0.2614
-0.90559	0.159373		-0.35305	0.159373		-0.55526	0.159373		-0.90559	-0.3717		-0.35305	-0.3717		-0.55526	-0.3717
-1.24629	-0.11302		-0.43869	-0.11302		-0.2263	-0.11302		-1.24629	-0.40586		-0.43869	-0.40586		-0.2263	-0.40586
-1.05087	0.033591		-0.79219	0.033591		-0.58813	0.033591		-1.05087	-0.49999		-0.79219	-0.49999		-0.58813	-0.49999
-1.28238	-0.88676		-0.4958	-0.88676		-0.38853	-0.88676		-1.28238	-0.40744		-0.4958	-0.40744		-0.38853	-0.40744
-0.85976	-0.06854		-0.26116	-0.06854		-0.25768	-0.06854		-0.85976	-0.35351		-0.26116	-0.35351		-0.25768	-0.35351
-0.68437	-0.09957		-0.33722	-0.09957		-0.39968	-0.09957		-0.68437	-0.28509		-0.33722	-0.28509		-0.39968	-0.28509
-0.85526	-0.16615		-0.66822	-0.16615		-0.77346	-0.16615		-0.85526	-0.44152		-0.66822	-0.44152		-0.77346	-0.44152
-0.65539	-0.03923		-0.21457	-0.03923		-0.06864	-0.03923		-0.65539	-0.1843		-0.21457	-0.1843		-0.06864	-0.1843
-0.62057	-0.05166		-0.27256	-0.05166		-0.39866	-0.05166		-0.62057	-0.25554		-0.27256	-0.25554		-0.39866	-0.25554
-0.75026	-0.08655		-0.33845	-0.08655		-0.62012	-0.08655		-0.75026	-0.27175		-0.33845	-0.27175		-0.62012	-0.27175
-1.09132	-0.16821		-0.41495	-0.16821		-0.5127	-0.16821		-1.09132	-0.33989		-0.41495	-0.33989		-0.5127	-0.33989
-1.52826	-0.16511		-0.63694	-0.16511		-0.37702	-0.16511		-1.52826	-0.92378		-0.63694	-0.92378		-0.37702	-0.92378
-0.44655	-0.14754		-0.30942	-0.14754		-0.13156	-0.14754		-0.44655	-0.17118		-0.30942	-0.17118		-0.13156	-0.17118
-1.00987	-0.08834		-0.40185	-0.08834		-0.29341	-0.08834		-1.00987	-0.28997		-0.40185	-0.28997		-0.29341	-0.28997
-0.4018	-0.14899		-0.50733	-0.14899		-0.26636	-0.14899		-0.4018	-0.37679		-0.50733	-0.37679		-0.26636	-0.37679
-0.89076	0.019392		-0.34959	0.019392		-0.36501	0.019392		-0.89076	-0.5356		-0.34959	-0.5356		-0.36501	-0.5356
-1.27695	-0.0785		-0.2834	-0.0785		-0.59326	-0.0785		-1.27695	-0.25154		-0.2834	-0.25154		-0.59326	-0.25154
-1.09081	-0.09549		-0.24395	-0.09549		-0.42439	-0.09549		-1.09081	-0.4058		-0.24395	-0.4058		-0.42439	-0.4058
-0.67381	-0.21382		-0.15719	-0.21382		-0.17257	-0.21382		-0.67381	-0.18295		-0.15719	-0.18295		-0.17257	-0.18295
-0.71203	-0.24364		-0.38796	-0.24364		-0.11321	-0.24364		-0.71203	-0.29106		-0.38796	-0.29106		-0.11321	-0.29106
-1.38086	-0.34792		-0.43475	-0.34792		-0.3886	-0.34792		-1.38086	-0.73109		-0.43475	-0.73109		-0.3886	-0.73109
-1.01437	-0.08579		-0.44415	-0.08579		-0.33079	-0.08579		-1.01437	-0.34028		-0.44415	-0.34028		-0.33079	-0.34028
-1.02063	-0.19934		-0.87872	-0.19934		-0.70653	-0.19934		-1.02063	-0.37633		-0.87872	-0.37633		-0.70653	-0.37633
-0.80254	-0.21853		-0.11704	-0.21853		-0.51953	-0.21853		-0.80254	-0.18122		-0.11704	-0.18122		-0.51953	-0.18122
-1.37408	0.162003		-0.31676	0.162003		-0.24457	0.162003		-1.37408	-0.04041		-0.31676	-0.04041		-0.24457	-0.04041
-1.38016	-0.09139		-0.46498	-0.09139		-0.55376	-0.09139		-1.38016	-0.39411		-0.46498	-0.39411		-0.55376	-0.39411
-0.41563	0.014071		-0.60815	0.014071		0.047603	0.014071		-0.41563	-0.18293		-0.60815	-0.18293		0.047603	-0.18293
-0.77128	-0.05934		-0.38641	-0.05934		-0.07482	-0.05934		-0.77128	-0.16461		-0.38641	-0.16461		-0.07482	-0.16461
-0.49606	-0.43608		-0.23516	-0.43608		-0.53387	-0.43608		-0.49606	-0.25318		-0.23516	-0.25318		-0.53387	-0.25318
-0.9994	-0.38449		-0.38275	-0.38449		-0.52433	-0.38449		-0.9994	-0.33876		-0.38275	-0.33876		-0.52433	-0.33876
-0.56229	0.194515		0.125311	0.194515		-0.1422	0.194515		-0.56229	-0.04547		0.125311	-0.04547		-0.1422	-0.04547
-0.48122	-0.44434		-0.44663	-0.44434		-0.21304	-0.44434		-0.48122	-0.28698		-0.44663	-0.28698		-0.21304	-0.28698
-1.2948	-0.64388		-0.4149	-0.64388		-0.35187	-0.64388		-1.2948	-0.34594		-0.4149	-0.34594		-0.35187	-0.34594
-0.62478	-0.05963		-0.19333	-0.05963		-0.2937	-0.05963		-0.62478	-0.20359		-0.19333	-0.20359		-0.2937	-0.20359
-0.89376	-0.76136		-0.32863	-0.76136		-0.6391	-0.76136		-0.89376	-0.6671		-0.32863	-0.6671		-0.6391	-0.6671
-0.57264	0.302636		-0.50723	0.302636		-0.12757	0.302636		-0.57264	-0.26804		-0.50723	-0.26804		-0.12757	-0.26804
-1.29215	-0.69261		-0.32529	-0.69261		-0.17703	-0.69261		-1.29215	-0.11874		-0.32529	-0.11874		-0.17703	-0.11874
-0.89212	-0.28041		-0.32141	-0.28041		-0.8332	-0.28041		-0.89212	-0.42191		-0.32141	-0.42191		-0.8332	-0.42191
-0.97783	-0.15329		-0.41566	-0.15329		-0.33135	-0.15329		-0.97783	-0.1883		-0.41566	-0.1883		-0.33135	-0.1883
-1.01884	-0.22814		-0.41066	-0.22814		-0.66052	-0.22814		-1.01884	-0.35063		-0.41066	-0.35063		-0.66052	-0.35063
-0.79401	0.098074		-0.51007	0.098074		-0.57341	0.098074		-0.79401	-0.13429		-0.51007	-0.13429		-0.57341	-0.13429
-1.00639	-1.34296		-0.42935	-1.34296		0.13349	-1.34296		-1.00639	-0.60791		-0.42935	-0.60791		0.13349	-0.60791
-0.78505	-0.21762		-0.27651	-0.21762		-0.51177	-0.21762		-0.78505	-0.36552		-0.27651	-0.36552		-0.51177	-0.36552
-0.7877	-0.62188		-0.29786	-0.62188		-0.24249	-0.62188		-0.7877	-0.30402		-0.29786	-0.30402		-0.24249	-0.30402
-0.57441	-0.5534		-0.39795	-0.5534		-0.23115	-0.5534		-0.57441	-0.28575		-0.39795	-0.28575		-0.23115	-0.28575
-0.95719	-0.98034		-0.65336	-0.98034		-0.28375	-0.98034		-0.95719	-0.17751		-0.65336	-0.17751		-0.28375	-0.17751
-1.08061	-0.81899		-0.46161	-0.81899		-0.48754	-0.81899		-1.08061	-0.57884		-0.46161	-0.57884		-0.48754	-0.57884
-0.97161	-1.08123		-0.53537	-1.08123		-0.52499	-1.08123		-0.97161	-0.17978		-0.53537	-0.17978		-0.52499	-0.17978
-0.75337	-0.29956		-0.47017	-0.29956		-0.01637	-0.29956		-0.75337	-0.23185		-0.47017	-0.23185		-0.01637	-0.23185
-0.67045	-0.53418		-0.56476	-0.53418		-0.31698	-0.53418		-0.67045	-0.1161		-0.56476	-0.1161		-0.31698	-0.1161
-0.85571	-0.408		-0.36366	-0.408		-0.46912	-0.408		-0.85571	-0.17949		-0.36366	-0.17949		-0.46912	-0.17949
-1.17096	-0.27124		-0.44145	-0.27124		-0.3142	-0.27124		-1.17096	-0.10063		-0.44145	-0.10063		-0.3142	-0.10063
-0.92242	0.074142		-0.18918	0.074142		-0.02994	0.074142		-0.92242	-0.29797		-0.18918	-0.29797		-0.02994	-0.29797
-1.49788	-0.04874		-0.53725	-0.04874		-0.25111	-0.04874		-1.49788	-0.05591		-0.53725	-0.05591		-0.25111	-0.05591
-0.41732	0.242461		-0.56446	0.242461		-0.50827	0.242461		-0.41732	-0.28762		-0.56446	-0.28762		-0.50827	-0.28762
-0.95971	-0.31783		-0.53315	-0.31783		-0.31041	-0.31783		-0.95971	-0.25613		-0.53315	-0.25613		-0.31041	-0.25613
-1.06599	-0.25079		-0.65648	-0.25079		-0.3097	-0.25079		-1.06599	-0.63561		-0.65648	-0.63561		-0.3097	-0.63561
-1.14393	-1.02513		-0.49988	-1.02513		-0.01456	-1.02513		-1.14393	-0.21943		-0.49988	-0.21943		-0.01456	-0.21943
-0.91084	-0.19455		-0.2106	-0.19455		-0.35912	-0.19455		-0.91084	-0.32986		-0.2106	-0.32986		-0.35912	-0.32986
-0.91129	-0.20172		-0.33403	-0.20172		-0.43061	-0.20172		-0.91129	-0.2003		-0.33403	-0.2003		-0.43061	-0.2003
-1.13015	0.167316		-0.19146	0.167316		-0.44143	0.167316		-1.13015	-0.29755		-0.19146	-0.29755		-0.44143	-0.29755
-0.99583	-0.16139		-0.36995	-0.16139		-0.25251	-0.16139		-0.99583	-0.36298		-0.36995	-0.36298		-0.25251	-0.36298
-1.05646	-0.01089		-0.50329	-0.01089		0.243076	-0.01089		-1.05646	-0.08191		-0.50329	-0.08191		0.243076	-0.08191
-0.49243	-0.0051		-0.64371	-0.0051		-0.83389	-0.0051		-0.49243	-0.19041		-0.64371	-0.19041		-0.83389	-0.19041
-0.34726	-0.29276		-0.20421	-0.29276		-0.02673	-0.29276		-0.34726	-0.22095		-0.20421	-0.22095		-0.02673	-0.22095
-1.16289	-0.54753		-0.29301	-0.54753		-0.30253	-0.54753		-1.16289	-0.23416		-0.29301	-0.23416		-0.30253	-0.23416
-0.92066	-0.15599		-0.57115	-0.15599		-0.34959	-0.15599		-0.92066	-0.26479		-0.57115	-0.26479		-0.34959	-0.26479
-0.44734	-0.10784		-0.32881	-0.10784		-0.19471	-0.10784		-0.44734	-0.33831		-0.32881	-0.33831		-0.19471	-0.33831
-1.29469	-0.2088		-0.54912	-0.2088		-0.44944	-0.2088		-1.29469	-0.32108		-0.54912	-0.32108		-0.44944	-0.32108
-0.95533	-0.86477		-0.62312	-0.86477		-0.42797	-0.86477		-0.95533	-0.37669		-0.62312	-0.37669		-0.42797	-0.37669
-1.14073	-0.63635		-0.37037	-0.63635		-0.76279	-0.63635		-1.14073	-0.10105		-0.37037	-0.10105		-0.76279	-0.10105
-1.16573	-0.22718		-0.56424	-0.22718		-0.56433	-0.22718		-1.16573	-0.46474		-0.56424	-0.46474		-0.56433	-0.46474
-1.21048	-0.45587		-0.36323	-0.45587		-0.9579	-0.45587		-1.21048	-0.18138		-0.36323	-0.18138		-0.9579	-0.18138
-1.21758	-0.13196		-0.47159	-0.13196		-0.69092	-0.13196		-1.21758	-0.18888		-0.47159	-0.18888		-0.69092	-0.18888
-0.45087	-0.02537		-0.39924	-0.02537		-0.04381	-0.02537		-0.45087	-0.12601		-0.39924	-0.12601		-0.04381	-0.12601
-0.64391	0.36635		-0.5411	0.36635		-0.09842	0.36635		-0.64391	-0.27698		-0.5411	-0.27698		-0.09842	-0.27698
-1.17728	-0.10754		-0.56558	-0.10754		-0.5256	-0.10754		-1.17728	-0.23752		-0.56558	-0.23752		-0.5256	-0.23752
-1.20339	-0.34196		-0.05058	-0.34196		-0.36038	-0.34196		-1.20339	-0.34369		-0.05058	-0.34369		-0.36038	-0.34369
-0.48494	0.080036		-0.34316	0.080036		-0.58198	0.080036		-0.48494	-0.19808		-0.34316	-0.19808		-0.58198	-0.19808
-0.87029	-0.65392		-0.42912	-0.65392		-0.42307	-0.65392		-0.87029	-0.30409		-0.42912	-0.30409		-0.42307	-0.30409
-1.06455	-0.09612		-0.50008	-0.09612		-0.51445	-0.09612		-1.06455	-0.23101		-0.50008	-0.23101		-0.51445	-0.23101
-0.96872	-0.39549		-0.39577	-0.39549		-0.36162	-0.39549		-0.96872	-0.28689		-0.39577	-0.28689		-0.36162	-0.28689
-0.6231	-0.08938		-0.19686	-0.08938		-0.2192	-0.08938		-0.6231	-0.42242		-0.19686	-0.42242		-0.2192	-0.42242
-1.14402	-0.79243		-0.26063	-0.79243		-0.28014	-0.79243		-1.14402	-0.3158		-0.26063	-0.3158		-0.28014	-0.3158
-0.88662	-0.42341		-0.62653	-0.42341		-0.28867	-0.42341		-0.88662	-0.47299		-0.62653	-0.47299		-0.28867	-0.47299
-1.37641	-0.1464		-0.50092	-0.1464		-0.78643	-0.1464		-1.37641	-0.2655		-0.50092	-0.2655		-0.78643	-0.2655
-0.96104	-0.08283		-0.62857	-0.08283		-0.53677	-0.08283		-0.96104	-0.3271		-0.62857	-0.3271		-0.53677	-0.3271
-1.01614	0.087603		-0.37458	0.087603		-0.58228	0.087603		-1.01614	-0.2334		-0.37458	-0.2334		-0.58228	-0.2334
-1.11225	-0.28087		-0.48086	-0.28087		-0.44709	-0.28087		-1.11225	-0.14141		-0.48086	-0.14141		-0.44709	-0.14141
-0.46672	0.224878		-0.02968	0.224878		-0.1133	0.224878		-0.46672	-0.05468		-0.02968	-0.05468		-0.1133	-0.05468
-0.88124	0.039578		-0.21086	0.039578		0.023327	0.039578		-0.88124	-0.13914		-0.21086	-0.13914		0.023327	-0.13914
-0.86432	-0.00994		-0.49722	-0.00994		-0.84023	-0.00994		-0.86432	-0.08898		-0.49722	-0.08898		-0.84023	-0.08898
-0.83035	-0.55795		-0.30503	-0.55795		-0.38223	-0.55795		-0.83035	-0.13996		-0.30503	-0.13996		-0.38223	-0.13996
-0.90161	0.097264		-0.48749	0.097264		-0.38418	0.097264		-0.90161	-0.20024		-0.48749	-0.20024		-0.38418	-0.20024
-0.70741	-0.19607		-0.3356	-0.19607		-0.33395	-0.19607		-0.70741	-0.56099		-0.3356	-0.56099		-0.33395	-0.56099
-1.0166	0.037313		-0.54865	0.037313		-0.36732	0.037313		-1.0166	-0.14963		-0.54865	-0.14963		-0.36732	-0.14963
-0.51033	0.006266		-0.4046	0.006266		-0.1926	0.006266		-0.51033	-0.31236		-0.4046	-0.31236		-0.1926	-0.31236
-0.51267	-0.27203		-0.28524	-0.27203		-0.07801	-0.27203		-0.51267	-0.22837		-0.28524	-0.22837		-0.07801	-0.22837
-0.78254	-0.79946		-0.64569	-0.79946		-0.54825	-0.79946		-0.78254	-0.34628		-0.64569	-0.34628		-0.54825	-0.34628
-1.31946	-0.91638		-0.40418	-0.91638		-0.27633	-0.91638		-1.31946	-0.30565		-0.40418	-0.30565		-0.27633	-0.30565
-0.48899	-0.33182		-0.41517	-0.33182		-0.3303	-0.33182		-0.48899	-0.39368		-0.41517	-0.39368		-0.3303	-0.39368
-1.03014	-0.392		-0.42559	-0.392		-0.67737	-0.392		-1.03014	-0.26966		-0.42559	-0.26966		-0.67737	-0.26966
-1.30961	-0.61443		-0.63944	-0.61443		-0.36648	-0.61443		-1.30961	-1.02565		-0.63944	-1.02565		-0.36648	-1.02565
-1.12702	-0.04836		-0.25486	-0.04836		-0.17673	-0.04836		-1.12702	-0.11601		-0.25486	-0.11601		-0.17673	-0.11601
-1.13433	-0.22627		-0.31826	-0.22627		-0.49194	-0.22627		-1.13433	-0.30614		-0.31826	-0.30614		-0.49194	-0.30614
-1.2188	-0.17531		-0.36277	-0.17531		-0.75205	-0.17531		-1.2188	-1.35698		-0.36277	-1.35698		-0.75205	-1.35698
-0.87439	-0.08474		-0.43805	-0.08474		-0.16856	-0.08474		-0.87439	-0.30813		-0.43805	-0.30813		-0.16856	-0.30813
-0.51301	-0.02859		-0.33951	-0.02859		-0.44987	-0.02859		-0.51301	-0.16234		-0.33951	-0.16234		-0.44987	-0.16234
-1.03882	0.029176		-0.12558	0.029176		-0.31973	0.029176		-1.03882	-0.12483		-0.12558	-0.12483		-0.31973	-0.12483
-0.3476	0.00355		-0.44532	0.00355		0.167037	0.00355		-0.3476	-0.39236		-0.44532	-0.39236		0.167037	-0.39236
-0.79672	-0.0994		-0.43476	-0.0994		-0.34886	-0.0994		-0.79672	-0.13708		-0.43476	-0.13708		-0.34886	-0.13708
-0.80593	-0.15794		-0.32474	-0.15794		-0.30634	-0.15794		-0.80593	-0.24011		-0.32474	-0.24011		-0.30634	-0.24011
-1.3776	0.061443		-0.15843	0.061443		-0.42258	0.061443		-1.3776	-0.19825		-0.15843	-0.19825		-0.42258	-0.19825
-1.08602	0.020092		-0.29609	0.020092		-0.40353	0.020092		-1.08602	-0.26574		-0.29609	-0.26574		-0.40353	-0.26574
-0.84371	0.252324		-0.45801	0.252324		-0.16411	0.252324		-0.84371	0.032468		-0.45801	0.032468		-0.16411	0.032468
-1.00951	0.032931		-0.38222	0.032931		-0.12776	0.032931		-1.00951	-0.3089		-0.38222	-0.3089		-0.12776	-0.3089
-1.09968	0.110714		-0.32819	0.110714		-0.17746	0.110714		-1.09968	-0.10889		-0.32819	-0.10889		-0.17746	-0.10889
-1.15624	-0.17791		-0.39996	-0.17791		-0.77985	-0.17791		-1.15624	-0.53435		-0.39996	-0.53435		-0.77985	-0.53435
-1.18066	-0.29688		-0.28178	-0.29688		-0.10031	-0.29688		-1.18066	-0.53674		-0.28178	-0.53674		-0.10031	-0.53674
-0.39351	0.134207		-0.0131	0.134207		-0.22467	0.134207		-0.39351	0.025441		-0.0131	0.025441		-0.22467	0.025441
-0.66074	-0.11502		-0.36035	-0.11502		-0.4578	-0.11502		-0.66074	-0.14595		-0.36035	-0.14595		-0.4578	-0.14595
-0.51515	-0.21874		-0.31709	-0.21874		-0.1993	-0.21874		-0.51515	-0.27555		-0.31709	-0.27555		-0.1993	-0.27555
-0.77005	-0.54158		-0.31617	-0.54158		-0.15333	-0.54158		-0.77005	-0.34469		-0.31617	-0.34469		-0.15333	-0.34469
-1.03286	-1.63966		-0.41712	-1.63966		-0.404	-1.63966		-1.03286	-0.35442		-0.41712	-0.35442		-0.404	-0.35442
-0.6851	-1.02829		-0.93031	-1.02829		-0.44125	-1.02829		-0.6851	-0.37492		-0.93031	-0.37492		-0.44125	-0.37492
-1.44894	-0.15897		-0.64593	-0.15897		-1.68033	-0.15897		-1.44894	-0.43048		-0.64593	-0.43048		-1.68033	-0.43048
-0.73823	-0.6048		-0.3768	-0.6048		0.057493	-0.6048		-0.73823	-0.12563		-0.3768	-0.12563		0.057493	-0.12563
-0.78861	-0.41146		-0.50903	-0.41146		-0.04625	-0.41146		-0.78861	-0.4437		-0.50903	-0.4437		-0.04625	-0.4437
-0.92777	-0.13338		-0.50167	-0.13338		-0.37766	-0.13338		-0.92777	-0.41713		-0.50167	-0.41713		-0.37766	-0.41713
-0.56347	-0.12474		-0.42673	-0.12474		-0.2272	-0.12474		-0.56347	-0.21015		-0.42673	-0.21015		-0.2272	-0.21015
-1.10973	0.020621		-0.47873	0.020621		-0.47857	0.020621		-1.10973	-0.18536		-0.47873	-0.18536		-0.47857	-0.18536
-0.81035	-1.2898		-0.12963	-1.2898		-0.23566	-1.2898		-0.81035	-0.19998		-0.12963	-0.19998		-0.23566	-0.19998
-1.05472	-0.26929		-0.17407	-0.26929		-0.23535	-0.26929		-1.05472	-0.28439		-0.17407	-0.28439		-0.23535	-0.28439
-1.03474	-0.68745		-0.52274	-0.68745		-0.22715	-0.68745		-1.03474	-0.428		-0.52274	-0.428		-0.22715	-0.428
-1.53094	-0.67931		-0.42149	-0.67931		-0.58333	-0.67931		-1.53094	-0.57703		-0.42149	-0.57703		-0.58333	-0.57703
-0.37111	-0.06009		-0.62003	-0.06009		-0.17941	-0.06009		-0.37111	-0.41419		-0.62003	-0.41419		-0.17941	-0.41419
-1.1625	-0.17029		-0.48142	-0.17029		-0.89214	-0.17029		-1.1625	-0.41618		-0.48142	-0.41618		-0.89214	-0.41618
-0.96445	-0.07594		-0.74437	-0.07594		-0.22126	-0.07594		-0.96445	-0.61719		-0.74437	-0.61719		-0.22126	-0.61719
-1.01159	-0.52399		-0.65412	-0.52399		-0.16677	-0.52399		-1.01159	-0.49092		-0.65412	-0.49092		-0.16677	-0.49092
-0.54074	-0.06207		-0.48226	-0.06207		-0.32651	-0.06207		-0.54074	-0.30002		-0.48226	-0.30002		-0.32651	-0.30002
-0.9322	-0.7407		-0.42764	-0.7407		-0.13252	-0.7407		-0.9322	-0.32349		-0.42764	-0.32349		-0.13252	-0.32349
-1.20982	-0.32981		-0.30949	-0.32981		-0.37261	-0.32981		-1.20982	-0.53509		-0.30949	-0.53509		-0.37261	-0.53509
-1.20351	-0.08025		-0.33584	-0.08025		-0.47689	-0.08025		-1.20351	-0.26034		-0.33584	-0.26034		-0.47689	-0.26034
-1.17373	-0.45927		-0.59268	-0.45927		-0.48021	-0.45927		-1.17373	-0.33836		-0.59268	-0.33836		-0.48021	-0.33836
-0.76679	-0.14374		-0.25925	-0.14374		-0.21201	-0.14374		-0.76679	-0.13099		-0.25925	-0.13099		-0.21201	-0.13099
-0.95292	-0.62742		-0.3106	-0.62742		-0.29167	-0.62742		-0.95292	-0.38277		-0.3106	-0.38277		-0.29167	-0.38277
-0.62197	0.008554		-0.27723	0.008554		-0.48068	0.008554		-0.62197	-0.26885		-0.27723	-0.26885		-0.48068	-0.26885
-1.29265	-0.56027		-0.52182	-0.56027		-0.35403	-0.56027		-1.29265	-0.57995		-0.52182	-0.57995		-0.35403	-0.57995
-1.09353	-0.45664		-0.30116	-0.45664		-0.61485	-0.45664		-1.09353	-0.39082		-0.30116	-0.39082		-0.61485	-0.39082
-0.9678	-0.8719		-0.3246	-0.8719		-0.20345	-0.8719		-0.9678	-0.26022		-0.3246	-0.26022		-0.20345	-0.26022
-1.10488	-0.13406		-0.36692	-0.13406		-0.41208	-0.13406		-1.10488	-0.41897		-0.36692	-0.41897		-0.41208	-0.41897
-1.41606	-0.10837		-0.37371	-0.10837		-0.42203	-0.10837		-1.41606	-0.33555		-0.37371	-0.33555		-0.42203	-0.33555
-1.23317	-0.62742		-0.55927	-0.62742		-0.39539	-0.62742		-1.23317	-0.3334		-0.55927	-0.3334		-0.39539	-0.3334
-0.84405	-0.29571		-0.42491	-0.29571		-0.5021	-0.29571		-0.84405	-0.42502		-0.42491	-0.42502		-0.5021	-0.42502
-1.02293	-1.2143		-0.86554	-1.2143		-1.06363	-1.2143		-1.02293	-0.26979		-0.86554	-0.26979		-1.06363	-0.26979
-0.87979	-0.74766		-0.31336	-0.74766		-0.34673	-0.74766		-0.87979	-0.16167		-0.31336	-0.16167		-0.34673	-0.16167
-0.7602	-0.07107		-0.37692	-0.07107		-0.27446	-0.07107		-0.7602	-0.29894		-0.37692	-0.29894		-0.27446	-0.29894
-1.14865	-0.16362		-0.34241	-0.16362		-0.50106	-0.16362		-1.14865	-0.20593		-0.34241	-0.20593		-0.50106	-0.20593
-0.94518	-0.04729		-0.38539	-0.04729		0.077225	-0.04729		-0.94518	-0.03366		-0.38539	-0.03366		0.077225	-0.03366
-1.01463	-0.03869		-0.56948	-0.03869		-0.76673	-0.03869		-1.01463	-0.28047		-0.56948	-0.28047		-0.76673	-0.28047
-0.57173	-0.17083		-0.44966	-0.17083		-0.36063	-0.17083		-0.57173	-0.1234		-0.44966	-0.1234		-0.36063	-0.1234
-0.94417	-0.41874		-0.34275	-0.41874		-0.22083	-0.41874		-0.94417	-0.26817		-0.34275	-0.26817		-0.22083	-0.26817
-0.88678	-0.06408		-0.35783	-0.06408		0.045612	-0.06408		-0.88678	-0.09969		-0.35783	-0.09969		0.045612	-0.09969
-0.69643	-0.83401		-0.43518	-0.83401		-0.29771	-0.83401		-0.69643	-0.39765		-0.43518	-0.39765		-0.29771	-0.39765
-0.84231	0.051467		-0.26591	0.051467		-0.35218	0.051467		-0.84231	-0.1292		-0.26591	-0.1292		-0.35218	-0.1292
-1.18423	-0.71857		-0.5951	-0.71857		-0.46498	-0.71857		-1.18423	-0.32985		-0.5951	-0.32985		-0.46498	-0.32985
-1.3061	-0.49963		-0.35737	-0.49963		-0.65912	-0.49963		-1.3061	-0.76038		-0.35737	-0.76038		-0.65912	-0.76038
-1.05119	-0.62943		-0.43821	-0.62943		-0.34662	-0.62943		-1.05119	-0.24656		-0.43821	-0.24656		-0.34662	-0.24656
-1.29792	-1.35743		-0.27893	-1.35743		-0.22734	-1.35743		-1.29792	-0.41949		-0.27893	-0.41949		-0.22734	-0.41949
-0.80946	-0.40321		-0.02647	-0.40321		-0.23774	-0.40321		-0.80946	-0.22597		-0.02647	-0.22597		-0.23774	-0.22597
-0.29394	0.12785		-0.27481	0.12785		-0.02071	0.12785		-0.29394	-0.14244		-0.27481	-0.14244		-0.02071	-0.14244
-0.16075	0.060402		-0.2989	0.060402		-0.23177	0.060402		-0.16075	-0.45899		-0.2989	-0.45899		-0.23177	-0.45899
-1.12857	-0.43014		-0.91775	-0.43014		-0.22391	-0.43014		-1.12857	0.010525		-0.91775	0.010525		-0.22391	0.010525
-1.21559	-1.15962		-0.70585	-1.15962		-0.39107	-1.15962		-1.21559	-0.09493		-0.70585	-0.09493		-0.39107	-0.09493
-1.02008	-0.91985		-0.70593	-0.91985		-0.38371	-0.91985		-1.02008	-0.22502		-0.70593	-0.22502		-0.38371	-0.22502
-0.9957	0.032807		-0.20148	0.032807		-0.52765	0.032807		-0.9957	-0.29195		-0.20148	-0.29195		-0.52765	-0.29195
-0.79934	-0.25431		-0.46274	-0.25431		-0.23154	-0.25431		-0.79934	-0.10458		-0.46274	-0.10458		-0.23154	-0.10458
-1.35513	-0.47723		-0.40627	-0.47723		-0.62074	-0.47723		-1.35513	-0.37344		-0.40627	-0.37344		-0.62074	-0.37344
-0.51066	0.099782		-0.34662	0.099782		-0.09655	0.099782		-0.51066	-0.08511		-0.34662	-0.08511		-0.09655	-0.08511
-0.97406	-0.24193		-0.48641	-0.24193		-0.17103	-0.24193		-0.97406	-0.20699		-0.48641	-0.20699		-0.17103	-0.20699
-0.32965	-0.14545		-0.57409	-0.14545		-0.42917	-0.14545		-0.32965	-0.22199		-0.57409	-0.22199		-0.42917	-0.22199
-0.6794	-0.14146		-0.23814	-0.14146		-0.4156	-0.14146		-0.6794	0.004427		-0.23814	0.004427		-0.4156	0.004427
-0.71909	-0.33042		-0.28502	-0.33042		-0.27144	-0.33042		-0.71909	-0.1073		-0.28502	-0.1073		-0.27144	-0.1073
-0.96276	-0.02183		-0.49185	-0.02183		-0.18675	-0.02183		-0.96276	-0.02811		-0.49185	-0.02811		-0.18675	-0.02811
-0.90629	-0.25506		-0.37239	-0.25506		-0.30732	-0.25506		-0.90629	-0.30365		-0.37239	-0.30365		-0.30732	-0.30365
-0.86733	-0.2318		-0.1523	-0.2318		-0.47317	-0.2318		-0.86733	-0.41988		-0.1523	-0.41988		-0.47317	-0.41988
-0.10698	-0.32988		-0.35037	-0.32988		-0.30401	-0.32988		-0.10698	-0.34764		-0.35037	-0.34764		-0.30401	-0.34764
-1.0689	-0.4999		-0.73845	-0.4999		-0.55297	-0.4999		-1.0689	-0.32511		-0.73845	-0.32511		-0.55297	-0.32511
-0.5498	-0.19176		-0.20709	-0.19176		-0.20502	-0.19176		-0.5498	-0.12724		-0.20709	-0.12724		-0.20502	-0.12724
-0.73468	-0.08154		-0.45405	-0.08154		-0.44713	-0.08154		-0.73468	-0.22882		-0.45405	-0.22882		-0.44713	-0.22882
-0.57886	-0.10935		-0.29881	-0.10935		-0.4409	-0.10935		-0.57886	-0.15065		-0.29881	-0.15065		-0.4409	-0.15065
-1.08799	-0.53837		-0.4195	-0.53837		-0.62481	-0.53837		-1.08799	-0.52511		-0.4195	-0.52511		-0.62481	-0.52511
-0.51767	0.131563		-0.24258	0.131563		0.095577	0.131563		-0.51767	-0.33953		-0.24258	-0.33953		0.095577	-0.33953
-1.03656	-0.01421		-0.4457	-0.01421		-0.15437	-0.01421		-1.03656	-0.0031		-0.4457	-0.0031		-0.15437	-0.0031
-1.16414	-0.10417		-0.67081	-0.10417		-0.64973	-0.10417		-1.16414	-0.133		-0.67081	-0.133		-0.64973	-0.133
-0.45976	0.070196		-0.30324	0.070196		-0.7745	0.070196		-0.45976	-0.42259		-0.30324	-0.42259		-0.7745	-0.42259
-0.92273	0.094457		0.100221	0.094457		-0.26686	0.094457		-0.92273	0.011612		0.100221	0.011612		-0.26686	0.011612
-0.94778	-0.14076		-0.39682	-0.14076		-0.38418	-0.14076		-0.94778	-0.24741		-0.39682	-0.24741		-0.38418	-0.24741
-0.68622	-0.00937		-0.52568	-0.00937		-0.22394	-0.00937		-0.68622	-0.20449		-0.52568	-0.20449		-0.22394	-0.20449
-1.13966	-0.29788		-0.56948	-0.29788		-0.40787	-0.29788		-1.13966	-0.51379		-0.56948	-0.51379		-0.40787	-0.51379
-0.79899	-0.21729		-0.42799	-0.21729		-0.11139	-0.21729		-0.79899	-0.06105		-0.42799	-0.06105		-0.11139	-0.06105
-1.3106	-0.07973		-0.4869	-0.07973		-1.02763	-0.07973		-1.3106	-0.2118		-0.4869	-0.2118		-1.02763	-0.2118
-1.0242	-0.68951		-0.08006	-0.68951		-0.22016	-0.68951		-1.0242	-0.10709		-0.08006	-0.10709		-0.22016	-0.10709
-0.78615	-0.18036		-0.6927	-0.18036		-0.32216	-0.18036		-0.78615	-0.26951		-0.6927	-0.26951		-0.32216	-0.26951
-0.82037	-0.13725		-0.21823	-0.13725		-0.33575	-0.13725		-0.82037	-0.12442		-0.21823	-0.12442		-0.33575	-0.12442
-0.84434	0.079099		-0.67592	0.079099		-0.2405	0.079099		-0.84434	-0.24889		-0.67592	-0.24889		-0.2405	-0.24889
-0.91101	-0.03407		-0.44644	-0.03407		-0.3367	-0.03407		-0.91101	-0.26172		-0.44644	-0.26172		-0.3367	-0.26172
-0.57403	-0.34862		-0.26556	-0.34862		-0.37989	-0.34862		-0.57403	-0.1073		-0.26556	-0.1073		-0.37989	-0.1073
-0.70387	-0.04168		-0.33251	-0.04168		-0.4626	-0.04168		-0.70387	-0.11011		-0.33251	-0.11011		-0.4626	-0.11011
-0.70677	-0.055		-0.62737	-0.055		-0.44462	-0.055		-0.70677	-0.13531		-0.62737	-0.13531		-0.44462	-0.13531
-0.45902	-0.17974		-0.57521	-0.17974		-0.21666	-0.17974		-0.45902	-0.3335		-0.57521	-0.3335		-0.21666	-0.3335
-1.03762	-0.07697		-0.26687	-0.07697		-0.38717	-0.07697		-1.03762	-0.17368		-0.26687	-0.17368		-0.38717	-0.17368
-1.07162	-0.24731		-0.12501	-0.24731		-0.41435	-0.24731		-1.07162	-0.2522		-0.12501	-0.2522		-0.41435	-0.2522
-0.93456	-1.08158		-0.4098	-1.08158		-0.42216	-1.08158		-0.93456	-0.48167		-0.4098	-0.48167		-0.42216	-0.48167
-0.69862	-0.00163		-0.35817	-0.00163		-0.33966	-0.00163		-0.69862	-0.23208		-0.35817	-0.23208		-0.33966	-0.23208
-1.13261	0.063433		-0.39051	0.063433		-0.58325	0.063433		-1.13261	-0.18302		-0.39051	-0.18302		-0.58325	-0.18302
-0.86723	-0.17372		-0.38273	-0.17372		-0.75983	-0.17372		-0.86723	-0.17355		-0.38273	-0.17355		-0.75983	-0.17355
-1.39877	-0.03211		-0.35688	-0.03211		-0.72128	-0.03211		-1.39877	-0.45927		-0.35688	-0.45927		-0.72128	-0.45927
-0.95849	-0.33535		-0.27731	-0.33535		-0.46105	-0.33535		-0.95849	-0.40609		-0.27731	-0.40609		-0.46105	-0.40609
-0.84766	-0.31625		-0.37396	-0.31625		-0.38286	-0.31625		-0.84766	-0.31771		-0.37396	-0.31771		-0.38286	-0.31771
-1.11085	-0.25523		-0.39615	-0.25523		-0.27308	-0.25523		-1.11085	-0.10147		-0.39615	-0.10147		-0.27308	-0.10147
-0.90424	-0.16629		-0.28945	-0.16629		-0.3302	-0.16629		-0.90424	-0.25109		-0.28945	-0.25109		-0.3302	-0.25109
-1.18203	-0.11547		-0.73602	-0.11547		-0.29276	-0.11547		-1.18203	-0.16028		-0.73602	-0.16028		-0.29276	-0.16028
-0.79313	-0.38628		-0.31062	-0.38628		-0.28539	-0.38628		-0.79313	-0.11573		-0.31062	-0.11573		-0.28539	-0.11573
-0.61822	-0.09331		-0.11473	-0.09331		-0.39757	-0.09331		-0.61822	-0.30113		-0.11473	-0.30113		-0.39757	-0.30113
-0.57804	-0.68288		-0.44047	-0.68288		-0.28866	-0.68288		-0.57804	-0.49392		-0.44047	-0.49392		-0.28866	-0.49392
-0.62658	-0.0624		-0.43602	-0.0624		-0.28906	-0.0624		-0.62658	-0.26958		-0.43602	-0.26958		-0.28906	-0.26958
-0.60342	-0.37862		-0.24657	-0.37862		-0.30188	-0.37862		-0.60342	-0.27264		-0.24657	-0.27264		-0.30188	-0.27264
-0.81209	-0.29959		-0.55784	-0.29959		-0.31524	-0.29959		-0.81209	-0.19459		-0.55784	-0.19459		-0.31524	-0.19459
-0.85523	-0.0193		-0.44074	-0.0193		-0.46344	-0.0193		-0.85523	-0.24801		-0.44074	-0.24801		-0.46344	-0.24801
-0.53208	-0.12272		-0.4242	-0.12272		-0.35434	-0.12272		-0.53208	-0.24384		-0.4242	-0.24384		-0.35434	-0.24384
-1.41406	-0.16661		-0.30354	-0.16661		-0.37066	-0.16661		-1.41406	-0.7671		-0.30354	-0.7671		-0.37066	-0.7671
-1.06909	-0.17666		-0.08667	-0.17666		-0.48864	-0.17666		-1.06909	-0.39813		-0.08667	-0.39813		-0.48864	-0.39813
-0.65023	-0.02236		-0.35619	-0.02236		-0.16596	-0.02236		-0.65023	-0.14773		-0.35619	-0.14773		-0.16596	-0.14773
-0.11937	0.069128		-0.15403	0.069128		-0.05812	0.069128		-0.11937	-0.14592		-0.15403	-0.14592		-0.05812	-0.14592
-0.83264	-0.13477		-0.05809	-0.13477		-0.26226	-0.13477		-0.83264	-0.27683		-0.05809	-0.27683		-0.26226	-0.27683
-1.09001	-0.15629		-0.23689	-0.15629		-0.42518	-0.15629		-1.09001	-0.35257		-0.23689	-0.35257		-0.42518	-0.35257
-0.64599	-0.27591		-0.26578	-0.27591		-0.38192	-0.27591		-0.64599	-0.31347		-0.26578	-0.31347		-0.38192	-0.31347
-0.90567	-0.56943		-0.35731	-0.56943		-0.33469	-0.56943		-0.90567	-0.20258		-0.35731	-0.20258		-0.33469	-0.20258
-0.63999	0.079568		-0.64827	0.079568		-0.15925	0.079568		-0.63999	-0.15991		-0.64827	-0.15991		-0.15925	-0.15991
-0.76479	-0.17367		-0.24465	-0.17367		-0.24419	-0.17367		-0.76479	-0.14		-0.24465	-0.14		-0.24419	-0.14
-0.65437	-0.13321		-0.46645	-0.13321		-0.10118	-0.13321		-0.65437	-0.24345		-0.46645	-0.24345		-0.10118	-0.24345
-0.84395	-0.30016		-0.20358	-0.30016		-0.43018	-0.30016		-0.84395	-0.18113		-0.20358	-0.18113		-0.43018	-0.18113
-0.74868	-0.18247		-0.65433	-0.18247		-0.06744	-0.18247		-0.74868	-0.30291		-0.65433	-0.30291		-0.06744	-0.30291
-0.83965	-0.13152		-0.53424	-0.13152		-0.25334	-0.13152		-0.83965	-0.20041		-0.53424	-0.20041		-0.25334	-0.20041
-0.5685	0.086124		-0.25351	0.086124		-0.26803	0.086124		-0.5685	-0.23129		-0.25351	-0.23129		-0.26803	-0.23129
-0.68934	-0.00075		-0.23075	-0.00075		-0.39527	-0.00075		-0.68934	-0.03939		-0.23075	-0.03939		-0.39527	-0.03939
-0.86212	-0.17271		-0.43988	-0.17271		-0.38881	-0.17271		-0.86212	-0.22027		-0.43988	-0.22027		-0.38881	-0.22027
-1.07441	-0.17238		-0.38612	-0.17238		-0.38506	-0.17238		-1.07441	-0.11484		-0.38612	-0.11484		-0.38506	-0.11484
-0.64206	-0.39813		-0.41624	-0.39813		-0.41052	-0.39813		-0.64206	-0.40099		-0.41624	-0.40099		-0.41052	-0.40099
-0.98085	-0.46785		-0.20133	-0.46785		-0.37524	-0.46785		-0.98085	-0.28087		-0.20133	-0.28087		-0.37524	-0.28087
-0.47289	-0.49641		-0.51665	-0.49641		-0.27733	-0.49641		-0.47289	-0.3527		-0.51665	-0.3527		-0.27733	-0.3527
-0.67282	-0.21285		-0.70105	-0.21285		-0.24991	-0.21285		-0.67282	-0.21141		-0.70105	-0.21141		-0.24991	-0.21141
-0.81173	0.037971		-0.18277	0.037971		-0.73961	0.037971		-0.81173	-0.22427		-0.18277	-0.22427		-0.73961	-0.22427
-0.44629	-0.50998		-0.27785	-0.50998		-0.14426	-0.50998		-0.44629	-0.10091		-0.27785	-0.10091		-0.14426	-0.10091
-0.69549	-0.16269		-0.25595	-0.16269		-0.23328	-0.16269		-0.69549	-0.24202		-0.25595	-0.24202		-0.23328	-0.24202
-0.9747	-0.14408		-0.11655	-0.14408		-0.07613	-0.14408		-0.9747	-0.26688		-0.11655	-0.26688		-0.07613	-0.26688
-0.65275	0.060277		-0.39411	0.060277		-0.05191	0.060277		-0.65275	-0.12422		-0.39411	-0.12422		-0.05191	-0.12422
-0.29228	-0.15918		-0.37664	-0.15918		-0.19688	-0.15918		-0.29228	-0.19052		-0.37664	-0.19052		-0.19688	-0.19052
-0.59547	-0.42579		-0.44974	-0.42579		-0.15199	-0.42579		-0.59547	-0.32091		-0.44974	-0.32091		-0.15199	-0.32091
-0.39274	-0.07204		-0.26574	-0.07204		-0.14552	-0.07204		-0.39274	-0.09702		-0.26574	-0.09702		-0.14552	-0.09702
-1.28218	-1.65858		-0.32336	-1.65858		-0.29142	-1.65858		-1.28218	-0.54659		-0.32336	-0.54659		-0.29142	-0.54659
-1.02341	-0.25814		-0.67023	-0.25814		-0.70124	-0.25814		-1.02341	-0.30306		-0.67023	-0.30306		-0.70124	-0.30306
-1.32194	-1.05278		-0.45475	-1.05278		-0.41358	-1.05278		-1.32194	-0.30288		-0.45475	-0.30288		-0.41358	-0.30288
-1.37006	-0.7495		-0.59842	-0.7495		-0.43519	-0.7495		-1.37006	-0.50975		-0.59842	-0.50975		-0.43519	-0.50975
-0.9461	-0.53052		-0.55644	-0.53052		-1.01167	-0.53052		-0.9461	-0.40141		-0.55644	-0.40141		-1.01167	-0.40141
-0.68985	-0.58711		-0.51971	-0.58711		-0.19147	-0.58711		-0.68985	0.005137		-0.51971	0.005137		-0.19147	0.005137
-1.00138	-0.96175		-0.49194	-0.96175		-0.80704	-0.96175		-1.00138	-0.28179		-0.49194	-0.28179		-0.80704	-0.28179
-0.43452	-0.27045		-0.16294	-0.27045		-0.39901	-0.27045		-0.43452	0.065927		-0.16294	0.065927		-0.39901	0.065927
-0.57799	-0.007		-0.58384	-0.007		-0.14169	-0.007		-0.57799	-0.32267		-0.58384	-0.32267		-0.14169	-0.32267
-1.01261	-0.02392		-0.36343	-0.02392		-0.67135	-0.02392		-1.01261	-0.14326		-0.36343	-0.14326		-0.67135	-0.14326
-0.86713	0.162642		-0.21546	0.162642		0.011247	0.162642		-0.86713	-0.18219		-0.21546	-0.18219		0.011247	-0.18219
-0.93942	-0.39455		-0.48293	-0.39455		-0.30825	-0.39455		-0.93942	-0.29827		-0.48293	-0.29827		-0.30825	-0.29827
-0.66585	-0.66597		-0.14382	-0.66597		-0.17763	-0.66597		-0.66585	-0.3137		-0.14382	-0.3137		-0.17763	-0.3137
-1.04908	-0.39033		-0.1583	-0.39033		-0.23331	-0.39033		-1.04908	0.052733		-0.1583	0.052733		-0.23331	0.052733
