# Supplementary material for: YAP/TAZ enhances P-body formation to promote tumorigenesis
Source: eLife. 2024 Jul 24;12:RP88573. doi: 10.7554/eLife.88573 (PMC11268890; doi:10.7554/eLife.88573)
Supplement: Figure 7—figure supplement 3—source data 1. [file elife-88573-fig7-figsupp3-data1.xlsx]

## Sheet: Figure 7-Figure Supplement 3A
	pQCXIH			PNRC1WT			PNRC1W300A
PNRC1	1.08387	0.970962	0.950213	3.29795	3.36451	3.28857	4.11179	4.55163	4.41851
PNRC1WT vs pQCXIH P value<0.0001
PNRC1WT vs PNRC1W300A P value<0.0001
	A549 PLKO			A549 LSM14A-sh1			A549 LSM14A-sh2
LSM14A	0.966639	1.02942	1.00495	0.160411	0.13699	0.15793	0.15471	0.137286	0.140374
LSM14Ash1 vs pLKO P value<0.0001
LSM14Ash2 vs pLKO P value<0.0001
	A549 PLKO			A549 DCP1A-sh1			A549 DCP1A-sh2			A549 DCP1A-sh3			A549 DCP1A-sh4
DCP1A	1.0281	0.973214	0.999442	0.480084	0.457497	0.468729	0.248522	0.225083	0.232815	0.314713	0.316926	0.36584	0.188897	0.188982	0.192354
DCP1Ash1 vs pLKO P value<0.0001
DCP1Ash2 vs pLKO P value<0.0001
DCP1Ash3 vs pLKO P value<0.0001
DCP1Ash4 vs pLKO P value<0.0001

## Sheet: Figure 7-Figure Supplement 3B
Day	pQCXIH					PNRC1WT					PNRC1W300A
1	0.0205	0.0095	0.0125	0.0135	0.0155	0.0115	0.0095	0.0215	0.0125	0.0125	0.0145	0.0115	0.0155	0.0165	0.0165
2	0.165	0.104	0.083	0.102	0.117	0.114	0.065	0.051	0.094	0.059	0.107	0.078	0.078	0.095	0.103
3	0.4935	0.3095	0.3475	0.3335	0.3645	0.0815	0.1125	0.1595	0.1515	0.0625	0.2745	0.3135	0.3365	0.2775	0.3945
4	2.417	2.089	1.928	2.353	2.268	1.149	1.058	0.897	1.307	0.901	2.224	1.439	1.509	1.804	2.065
5	2.532	3.291	3.437	3.335	2.963	1.558	1.52	2.068	1.743	1.462	2.436	3.17	3.592	3.431	2.954
	PNRC1WT vs pQCXIH P value<0.0001
	PNRC1WT vs PNRC1W300A P value<0.0001
Day	A549 pLKO			A549 LSM14A-sh1			A549 LSM14A-sh2
1	0.0135	0.0155	0.0165	0.0145	0.0125	0.0125	0.0125	0.0135	0.0115	LSM14Ash1 vs pLKO P value=0.0473
2	0.102	0.094	0.095	0.071	0.059	0.103	0.073	0.08	0.098	LSM14Ash2 vs pLKO P value=0.0079
3	0.4105	0.3545	0.4485	0.1905	0.1395	0.4325	0.1755	0.1785	0.2035
4	2.353	1.804	2.31	0.734	0.901	1.859	0.866	0.805	1.071
5	3.335	3.431	3.519	1.553	1.462	2.954	2.261	1.826	2.276
Day	pLKO			DCP1A-sh1			DCP1A-sh2			DCP1A-sh3			DCP1A-sh4
1	0.0135	0.0155	0.0165	0.0125	0.0135	0.0115	0.0145	0.0115	0.0085	0.0105	0.0115	0.0095	0.0135	0.0155	0.0115
2	0.102	0.094	0.095	0.068	0.083	0.081	0.094	0.061	0.068	0.098	0.083	0.096	0.093	0.114	0.105
3	0.4105	0.4485	0.3545	0.2415	0.2125	0.2005	0.2935	0.1775	0.2355	0.2025	0.2025	0.2615	0.2365	0.2755	0.2445
4	2.353	2.31	1.804	1.419	0.898	0.947	1.703	1.494	1.252	1.011	0.924	0.872	0.985	0.902	1.277
5	3.335	3.519	3.431	1.763	1.442	1.328	2.449	1.67	2.262	1.427	1.384	1.566	1.2	1.072	1.61
	DCP1Ash1 vs pLKO P value<0.0001
	DCP1Ash2 vs pLKO P value=0.0038
	DCP1Ash3 vs pLKO P value<0.0001
	DCP1Ash4 vs pLKO P value<0.0001

## Sheet: Figure 7-Figure Supplement 3C
pQCXIH			PNRC1WT			PNRC1W300A
99.5071	99.2867	101.206	66.7216	66.2623	59.2313	98.9211	96.7556	96.7298
PNRC1WT vs pQCXIH P value<0.0001
PNRC1WT vs PNRC1W300A P value<0.0001
pLKO			LSM14Ash1			LSM14Ash2
100.788	98.6328	100.579	43.2209	43.3243	44.6731	35.9041	37.0031	38.9425
LSM14Ash1 vs pLKO P value<0.0001
LSM14Ash2 vs pLKO P value<0.0001
pLKO			DCP1Ash1			DCP1Ash2			DCP1Ash3			DCP1Ash4
99.4344	99.5121	101.053	30.7243	30.9073	32.5858	20.182	20.0829	21.6227	38.0117	40.2238	43.9727	30.9789	31.0612	31.0612
DCP1Ash1 vs pLKO P value<0.0001
DCP1Ash2 vs pLKO P value<0.0001
DCP1Ash3 vs pLKO P value<0.0001
DCP1Ash4 vs pLKO P value<0.0001
