# Supplementary material for: YAP/TAZ enhances P-body formation to promote tumorigenesis
Source: eLife. 2024 Jul 24;12:RP88573. doi: 10.7554/eLife.88573 (PMC11268890; doi:10.7554/eLife.88573)
Supplement: Figure 7—figure supplement 4—source data 1. [file elife-88573-fig7-figsupp4-data1.xlsx]

## Sheet: Figure 7-Figure Supplement 4A
	pQCXIH			PNRC1WT			PNRC1W300A
PNRC1	1.06932	0.965986	0.968106	4.55634	4.95088	4.99297	4.78697	5.14763	4.94424
PNRC1WT vs pQCXIH P value<0.0001
PNRC1WT vs PNRC1W300A P value<0.0001
	pLKO			LSM14Ash1			LSM14Ash2
LSM14A	0.993368	0.975712	1.03173	0.157971	0.152943	0.158202	0.195007	0.18315	0.169548
LSM14Ash1 vs pLKO P value<0.0001
LSM14Ash2 vs pLKO P value<0.0001
	pLKO			DCP1Ash1			DCP1Ash2			DCP1Ash3			DCP1Ash4
DCP1A	1.00543	0.954605	1.0419	0.415893	0.369341	0.374362	0.212002	0.199619	0.19079	0.302905	0.32479	0.309957	0.173247	0.210598	0.188893
DCP1Ash1 vs pLKO P value<0.0001
DCP1Ash2 vs pLKO P value<0.0001
DCP1Ash3 vs pLKO P value<0.0001
DCP1Ash4 vs pLKO P value<0.0001

## Sheet: Figure 7-Figure Supplement 4B
Day	pQCXIH						PNRC1WT						PNRC1W300A
1	0.041	0.041	0.047	0.05	0.049	0.044	0.055	0.059	0.053	0.056	0.053	0.054	0.057	0.064	0.051	0.057	0.057	0.057
2	0.142	0.087	0.14	0.153	0.151	0.172	0.12	0.083	0.117	0.128	0.135	0.107	0.168	0.09	0.139	0.152	0.167	0.179
3	0.284	0.286	0.272	0.282	0.278	0.288	0.203	0.283	0.196	0.199	0.227	0.189	0.209	0.269	0.21	0.384	0.252	0.255
4	0.511	0.396	0.518	0.598	0.393	0.489	0.309	0.215	0.285	0.387	0.296	0.287	0.513	0.691	0.613	0.417	0.593	0.531
5	0.808	0.703	0.694	0.807	0.745	0.782	0.459	0.579	0.54	0.48	0.412	0.488	0.939	0.786	0.946	0.651	0.734	0.711
PNRC1WT vs pQCXIH P value<0.0001
PNRC1WT vs PNRC1W300A P value<0.0001
Day	MCF7 pLKO			MCF7 LSM14A-sh1			MCF7 LSM14A-sh2
1	0.0225	0.0175	0.0225	0.0175	0.0155	0.0195	0.0195	0.0195	0.0225
2	0.037	0.034	0.039	0.027	0.035	0.04	0.031	0.032	0.034
3	0.0995	0.1045	0.0955	0.0865	0.0985	0.0915	0.0665	0.0655	0.0655
4	0.281	0.289	0.285	0.228	0.209	0.237	0.162	0.153	0.157
5	0.5715	0.5515	0.5565	0.3965	0.4205	0.4105	0.3695	0.2765	0.3055
LSM14Ash1 vs pLKO P value<0.0001
LSM14Ash2 vs pLKO P value=0.0010
Day	MCF7 pLKO			MCF7 DCP1A-sh1			MCF7 DCP1A-sh2			MCF7 DCP1A-sh3			MCF7 DCP1A-sh4
1	0.0225	0.0175	0.0225	0.0225	0.0185	0.0185	0.0205	0.0215	0.0205	0.0095	0.0085	0.0105	0.0165	0.0145	0.0165
2	0.037	0.034	0.039	0.041	0.043	0.032	0.02	0.022	0.02	0.013	0.009	0.012	0.026	0.022	0.029
3	0.0995	0.1045	0.0955	0.1115	0.1105	0.1085	0.0635	0.0655	0.0685	0.0455	0.0485	0.0505	0.0635	0.0695	0.0655
4	0.281	0.289	0.285	0.317	0.297	0.31	0.177	0.197	0.187	0.131	0.114	0.125	0.202	0.158	0.185
5	0.5715	0.5515	0.5565	0.5155	0.4905	0.4925	0.2685	0.2615	0.3085	0.2765	0.3095	0.2345	0.3075	0.2945	0.3675
DCP1Ash1 vs pLKO P value=0.189
DCP1Ash2 vs pLKO P value<0.0001
DCP1Ash3 vs pLKO P value=0.0002
DCP1Ash4 vs pLKO P value=0.0005

## Sheet: Figure 7-Figure Supplement 4C
pQCXIH			PNRC1WT			PNRC1W300A
100.5	99.7	99.8	56.3	57	61.8	89.4	89	100
PNRC1WT vs pQCXIH P value<0.0001
PNRC1WT vs PNRC1W300A P value<0.0001
pLKO			DCP1Ash1			DCP1Ash2			DCP1Ash3			DCP1Ash4			LSM14Ash1			LSM14Ash2
92.9	98.8	108.3	44.9	52.9	52.1	43.3	54.4	53.2	18.5	42.3	28.1	48	64.5	60.7	50	54.8	60	47	61.2	52.3
DCP1Ash1 vs pLKO P value<0.0001
DCP1Ash2 vs pLKO P value<0.0001
DCP1Ash3 vs pLKO P value<0.0001
DCP1Ash4 vs pLKO P value<0.0001
LSM14Ash1 vs pLKO P value<0.0001
LSM14Ash2 vs pLKO P value<0.0001
