# Supplementary material for: YAP/TAZ enhances P-body formation to promote tumorigenesis
Source: eLife. 2024 Jul 24;12:RP88573. doi: 10.7554/eLife.88573 (PMC11268890; doi:10.7554/eLife.88573)
Supplement: Figure 7—figure supplement 5—source data 1. [file elife-88573-fig7-figsupp5-data1.xlsx]

## Sheet: Figure 7-Figure Supplement 5A
pQCXIH			PNRC1WT			PNRC1W300A
0.990204	0.993737	1.01626	4.48948	4.50199	4.42639	4.43358	4.42473	4.56622
PNRC1WT vs pQCXIH P value<0.0001
PNRC1WT vs PNRC1W300A P value<0.0001
231 pLKO			231 LSM14A-sh1			231 LSM14A-sh2
1.01294	0.972429	1.01521	0.579614	0.542687	0.498381	0.325975	0.331986	0.344932
LSM14Ash1 vs pLKO P value<0.0001
LSM14Ash2 vs pLKO P value<0.0001
pLKO			DCP1Ash1			DCP1Ash2			DCP1Ash3			DCP1Ash4
0.972948	0.981979	1.04667	0.205076	0.189525	0.202424	0.205076	0.189525	0.202424	0.424019	0.386696	0.410871	0.2042	0.204074	0.221484
DCP1Ash1 vs pLKO P value<0.0001
DCP1Ash2 vs pLKO P value<0.0001
DCP1Ash3 vs pLKO P value<0.0001
DCP1Ash4 vs pLKO P value<0.0001

## Sheet: Figure 7-Figure Supplement 5B
Day	pQCXIH						PNRC1WT						PNRC1W300A
1	0.115	0.131	0.13	0.13	0.129	0.13	0.107	0.115	0.111	0.115	0.119	0.12	0.111	0.121	0.109	0.125	0.116	0.113
2	0.317	0.366	0.396	0.379	0.426	0.399	0.219	0.218	0.266	0.266	0.266	0.317	0.29	0.368	0.391	0.348	0.451	0.429
3	0.759	0.81	0.546	0.684	0.58	0.66	0.388	0.296	0.295	0.418	0.37	0.393	0.779	0.68	0.526	0.666	0.506	0.546
4	1.215	0.908	1.046	0.973	0.9	0.876	0.655	0.424	0.582	0.663	0.69	0.691	1.168	1.105	1.042	1.298	0.915	1.057
5	1.837	1.503	1.956	1.663	1.55	1.691	1.12	1.266	0.913	1.09	0.893	1.126	1.577	1.675	1.515	1.651	1.694	1.642
PNRC1WT vs pQCXIH P value<0.0001
PNRC1WT vs PNRC1W300A P value=0.0006
Day	231 pLKO			231 LSM14A-sh1			231 LSM14A-sh2
1	0.0475	0.0445	0.0435	0.0455	0.0445	0.0455	0.0375	0.0415	0.0285		LSM14Ash1 vs pLKO P value=0.0468
2	0.183	0.161	0.168	0.132	0.136	0.129	0.082	0.082	0.084		LSM14Ash2 vs pLKO P value=0.0032
3	0.2465	0.2335	0.1915	0.1985	0.1735	0.1855	0.0995	0.1065	0.1015
4	0.638	0.624	0.498	0.416	0.37	0.445	0.209	0.199	0.171
5	0.8075	0.8215	1.0755	0.6205	0.5395	0.5725	0.2815	0.2395	0.2405
Day	231 pLKO			231 DCP1A-sh1			231 DCP1A-sh2			231 DCP1A-sh3			231 DCP1A-sh4
1	0.0515	0.0515	0.0475	0.0345	0.0335	0.0295	0.0465	0.0485	0.0475	0.0465	0.0545	0.0485	0.0545	0.0545	0.0605
2	0.165	0.178	0.167	0.085	0.078	0.077	0.079	0.066	0.061	0.104	0.13	0.117	0.088	0.088	0.087
3	0.2225	0.2695	0.2715	0.1115	0.1025	0.1055	0.1005	0.1125	0.0965	0.1345	0.1355	0.1325	0.0875	0.0865	0.0815
4	0.564	0.481	0.571	0.182	0.209	0.172	0.274	0.303	0.237	0.269	0.266	0.248	0.303	0.213	0.26
5	0.7575	0.8025	0.7425	0.3245	0.3145	0.3055	0.4295	0.3975	0.4145	0.3985	0.4445	0.4465	0.3665	0.4635	0.3535
DCP1Ash1 vs pLKO P value<0.0001
DCP1Ash2 vs pLKO P value<0.0001
DCP1Ash3 vs pLKO P value=0.0001
DCP1Ash4 vs pLKO P value=0.0007

## Sheet: Figure 7-Figure Supplement 5C
pQCXIH			PNRC1WT			PNRC1W300A
96.9499	101.956	101.094	72.4381	69.9836	66.5086	96.2366	97.27	99.2654
PNRC1WT vs pQCXIH P value<0.0001
PNRC1WT vs PNRC1W300A P value<0.0001
pLKO			DCP1Ash1			DCP1Ash2			DCP1Ash3			DCP1Ash4			LSM14Ash1			LSM14Ash2
99.1903	99.2598	101.55	23.5455	23.7433	21.8613	38.1824	37.9136	37.1666	37.5756	35.0734	31.2519	38.6894	41.0323	44.5196	29.3184	30.6148	32.0167	34.17	33.856	35.8599
DCP1Ash1 vs pLKO P value<0.0001
DCP1Ash2 vs pLKO P value<0.0001
DCP1Ash3 vs pLKO P value<0.0001
DCP1Ash4 vs pLKO P value<0.0001
LSM14Ash1 vs pLKO P value<0.0001
LSM14Ash2 vs pLKO P value<0.0001
