# Supplementary material for: YAP/TAZ enhances P-body formation to promote tumorigenesis
Source: eLife. 2024 Jul 24;12:RP88573. doi: 10.7554/eLife.88573 (PMC11268890; doi:10.7554/eLife.88573)
Supplement: Figure 7—source data 1. [file elife-88573-fig7-data1.xlsx]

## Sheet: Figure 7A
P value= 3.35E-147			P value= 1.54E-112		P value= 4.47E-140
CCN2 log2(TPM+1) Expression 22Q1 Public	SAMD4A log2(TPM+1) Expression 22Q1 Public		CCN2 log2(TPM+1) Expression 22Q1 Public	AJUBA log2(TPM+1) Expression 22Q1 Public	CCN2 log2(TPM+1) Expression 22Q1 Public	WTIP log2(TPM+1) Expression 22Q1 Public
0.9855	1.74846		0.9855	2.62527	0.9855	0.389567
8.32885	5.51318		8.32885	5.19535	8.32885	3.41954
6.40003	3.46858		6.40003	4.46074	6.40003	2.44095
1.04264	1.25096		1.04264	3.68594	1.04264	0.545968
0.516015	2.90881		0.516015	5.06824	0.516015	1.97085
3.21101	0.555816		3.21101	5.35403	3.21101	0.042644
2.61353	1.82782		2.61353	5.60792	2.61353	0.286881
0.189034	5.34767		0.189034	5.81813	0.189034	0.443607
2.15704	4.10685		2.15704	0.31034	2.15704	0.863938
0.956057	0.903038		0.956057	4.83996	0.956057	0.536053
6.79051	4.49442		6.79051	4.26003	6.79051	3.18428
7.35658	3.24641		7.35658	5.01257	7.35658	3.66562
5.87012	4.12267		5.87012	6.46254	5.87012	3.74308
7.81115	3.14078		7.81115	5.34908	7.81115	0.070389
0.15056	1.54102		0.15056	4.55643	0.15056	0.214125
8.01201	4.34127		8.01201	4.64501	8.01201	3.79909
3.15543	2.51853		3.15543	5.82934	3.15543	2.24793
3.56194	2.46728		3.56194	5.67271	3.56194	2.80529
5.78764	2.63227		5.78764	2.98002	5.78764	4.84699
1.0072	0.31034		1.0072	5.1807	1.0072	0.238787
8.86944	4.7366		8.86944	4.81506	8.86944	3.66676
4.16591	2.3978		4.16591	2.11103	4.16591	1.43829
4.50399	4.98185		4.50399	4.8475	4.50399	1.20163
5.59096	3.49057		5.59096	5.26978	5.59096	2.9222
2.47249	0.097611		2.47249	4.79129	2.47249	2.55336
5.7732	3.69488		5.7732	5.70846	5.7732	1.46989
5.63459	4.31034		5.63459	4.86344	5.63459	1.98914
1.27501	0.189034		1.27501	5.12516	1.27501	0.111031
3.35614	2.80529		3.35614	2.83794	3.35614	0.495695
3.78241	3.44228		3.78241	4.54597	3.78241	2.43296
5.04133	1.05658		5.04133	1.26303	5.04133	2.52857
2.28392	2.51349		2.28392	6.02303	2.28392	0.555816
7.10182	2.01436		7.10182	4.46271	7.10182	1.90304
4.9905	2.61589		4.9905	2.95791	4.9905	3.49569
7.93292	5.9472		7.93292	3.49569	7.93292	3.01257
4.4522	2.0321		4.4522	2.51601	4.4522	2.72465
4.50271	4.02768		4.50271	5.5008	4.50271	0.454176
3.36737	3.70044		3.36737	3.17792	3.36737	1.926
3.88362	2.37574		3.88362	2	3.88362	2.25096
3.04963	4.14405		3.04963	3.67016	3.04963	3.82782
0.275007	0.056584		0.275007	5.00854	0.275007	0.739848
1.23879	2.49314		1.23879	0.356144	1.23879	0.333424
5.75622	2.16671		5.75622	5.20906	5.75622	3.13093
0.495695	2.22033		0.495695	2.34199	0.495695	0.613532
3.47897	4.65993		3.47897	6.40888	3.47897	1.59932
4.28021	4.11936		4.28021	5.17353	4.28021	0.978196
2.28983	0.863938		2.28983	5.05441	2.28983	0.201634
1.91457	3.27947		1.91457	4.9458	1.91457	0.555816
4.52356	2.8679		4.52356	4.30961	4.52356	2.39506
5.07382	2.26003		5.07382	4.52482	5.07382	0.097611
3.03034	4.70763		3.03034	5.64184	3.03034	4.77347
5.74362	2.72683		5.74362	5.50176	5.74362	2.43296
0	0.678072		0	3.87381	0	0.042644
4.38267	3.66106		4.38267	6.36229	4.38267	2.0072
1.82375	0.85599		1.82375	4.15218	1.82375	4.0036
4.49761	1.62293		4.49761	5.51979	4.49761	3.92695
7.02978	2.21413		7.02978	0.918386	7.02978	3.21723
6.70736	2.51853		6.70736	4.5097	6.70736	4.61294
3.3799	1.93734		3.3799	4.82324	3.3799	0.176323
3.67469	2.79701		3.67469	6.26454	3.67469	0.454176
4.87036	0.584963		4.87036	6.7174	4.87036	2.7866
4.67976	3.51728		4.67976	6.66775	4.67976	0.62293
0.575312	0.956057		0.575312	5.09297	0.575312	0.485427
4.13996	0.15056		4.13996	1	4.13996	0.163499
1.07039	2.3978		1.07039	4.47444	1.07039	0.124328
0.042644	0.028569		0.042644	6.41566	0.042644	0.378512
2.96532	3.93923		2.96532	5.43496	2.96532	1.9486
2.94298	3.53854		2.94298	5.73227	2.94298	1.45418
4.42425	2.79494		4.42425	5.14364	4.42425	2.99639
3.28244	3.93263		3.28244	1.5008	3.28244	3.15543
5.19967	2.14078		5.19967	6.19967	5.19967	4.01168
10.1628	6.36036		10.1628	3.926	10.1628	4.30597
5.11894	3.57046		5.11894	6.4116	5.11894	0.526069
0.765535	2.27799		0.765535	5.27538	0.765535	3.03386
0.594549	0.933573		0.594549	4.03122	0.594549	0.15056
7.15927	4.06091		7.15927	3.62761	7.15927	3.51979
5.47184	1.51096		5.47184	6.17213	5.47184	3.79181
5.70984	1.73552		5.70984	5.17433	5.70984	1.04264
8.65582	5.01257		8.65582	1.67356	8.65582	0.526069
1.89918	0.526069		1.89918	5.10727	1.89918	0.411426
6.46956	2.65535		6.46956	4.72629	6.46956	4.35403
1.37295	4.12846		1.37295	4.22728	1.37295	4.40803
0	4.53107		0	6.34181	0	0.028569
6.01033	1.56072		6.01033	5.47119	6.01033	2.65076
1.18269	1.31615		1.18269	5.17273	1.18269	1.33914
0.485427	0.422233		0.485427	2.37295	0.485427	0.678072
2.83188	1.68706		2.83188	0.941106	2.83188	4.11686
0.137504	0.678072		0.137504	4.749	0.137504	1.31615
6.89105	3.44758		6.89105	3.11769	6.89105	0.505891
4.57046	3.8679		4.57046	2.62527	4.57046	4.19298
2.24184	6.29554		2.24184	5.23458	2.24184	4.33271
9.33588	4.3978		9.33588	6.06652	9.33588	4.66391
6.84712	4.42962		6.84712	2.79494	6.84712	3.06005
1.90689	1.90689		1.90689	4.06867	1.90689	1.41684
5.22843	3.56803		5.22843	4.90497	5.22843	1.03562
5.78529	2.09085		5.78529	4.34625	5.78529	0.176323
0.903038	2.73118		0.903038	5.24755	0.903038	1.43829
7.42206	3.63575		7.42206	4.35614	7.42206	2.31034
4.14568	3.30159		4.14568	5.84172	4.14568	3.86592
2.96162	3.75489		2.96162	0.704872	2.96162	3.70708
0.925999	1.20789		0.925999	3.89918	0.925999	0.516015
0.286881	3.82782		0.286881	1.93734	0.286881	1.59932
1.26903	2.61117		1.26903	5.85649	1.26903	0.713696
5.24298	3.06867		5.24298	5.8268	5.24298	1.03562
0.863938	4.18507		0.863938	6.08428	0.863938	0.226509
5.73227	3.06867		5.73227	4.59156	5.73227	1.91457
2.85	1.76554		2.85	2.0321	2.85	0.367371
1.90304	1.38405		1.90304	3.15543	1.90304	0.275007
1.14405	2.30743		1.14405	4.69209	1.14405	0.678072
6.0376	3.34767		6.0376	0.941106	6.0376	4.05918
1.0072	2.11437		1.0072	4.90785	1.0072	3.48285
2.07382	2.06695		2.07382	1.48543	2.07382	1.33342
2.49314	4.70376		2.49314	5.72601	2.49314	1.66903
0.163499	0.042644		0.163499	2.32769	0.163499	0.137504
3.54102	2.50589		3.54102	3.37574	3.54102	4.46532
7.76222	5.21684		7.76222	5.67553	7.76222	2.75702
6.93463	4.26903		6.93463	5.65507	6.93463	0.432959
1.05658	3.54473		1.05658	6.07254	1.05658	0.659925
5.15543	3.02857		5.15543	4.37712	5.15543	2.16993
3.4343	3.15056		3.4343	0.526069	3.4343	3.90593
3.16027	2.52607		3.16027	5.86567	3.16027	3.47508
3.08746	1.26303		3.08746	0.042644	3.08746	1.41684
0.226509	0.176323		0.226509	0.201634	0.226509	0.918386
5.05572	3.48543		5.05572	4.0321	5.05572	1.01435
8.27235	4.26754		8.27235	2.03914	8.27235	2.93357
10.5053	4.34979		10.5053	4.75328	10.5053	4.47379
5.25777	4.44493		5.25777	5.74927	5.25777	3.85499
8.19913	4.72629		8.19913	5.06048	8.19913	1.07039
11.0477	4.28318		11.0477	6.10915	11.0477	4.24793
0.137504	0.613532		0.137504	4.62936	0.137504	0.226509
0	1.82782		0	5.92053	0	0.333424
0.757023	0.432959		0.757023	2.86592	0.757023	0.443607
6.44609	4.39849		6.44609	5.14893	6.44609	3.04789
3.32193	1.51096		3.32193	1.95977	3.32193	0.650765
6.07275	3.59694		6.07275	1.50589	6.07275	3.17951
5.44956	2.83592		5.44956	5.91217	5.44956	2.0036
1.97453	1.14405		1.97453	6.58075	1.97453	0.226509
3.11437	2.95791		3.11437	6.5735	3.11437	0.31034
7.47703	4.74147		7.47703	0.226509	7.47703	4.58737
2.35896	2.60881		2.35896	4.17632	2.35896	2.25701
3.64616	2.52857		3.64616	4.59991	3.64616	1.43296
1.98914	1.94111		1.98914	6.42559	1.98914	0.485427
6.15805	5.2211		6.15805	4.89627	6.15805	5.32012
0.214125	1.61353		0.214125	5.68117	0.214125	0.356144
0.389567	0.757023		0.389567	5.71342	0.389567	0.238787
0	0		0	3.80116	0	0.298658
0.978196	3.3505		0.978196	3.69822	0.978196	2.16027
6.32948	1.26903		6.32948	0.757023	6.32948	0.903038
4.65993	2.02503		4.65993	3.60644	4.65993	1.57046
5.7658	1.57046		5.7658	4.6605	5.7658	2.46728
1.4489	5.58616		1.4489	6.26529	1.4489	0.367371
10.4769	3.75382		10.4769	5.0648	10.4769	2.77189
0.137504	0.847997		0.137504	5.11478	0.137504	1.39506
0.111031	0.238787		0.111031	1.38405	0.111031	0.356144
6.94942	2.9222		6.94942	2.96717	6.94942	3.45681
4.06781	2.64616		4.06781	4.54411	4.06781	1.4489
8.9467	4.42626		8.9467	5.33163	8.9467	3.4343
2.64155	4.12681		2.64155	0.111031	2.64155	2.86592
0.799087	2.37574		0.799087	5.10434	0.799087	1.29866
9.17498	4.13175		9.17498	2.97085	9.17498	4.06178
5.27984	1.28688		5.27984	4.2817	5.27984	0.333424
7.51294	3.66676		7.51294	3.68145	7.51294	2.18269
4.42694	1.49057		4.42694	2.06005	4.42694	1.08406
0.111031	0.163499		0.111031	6.1127	0.111031	2.36177
2.80323	2.20789		2.80323	5.72928	2.80323	2.43029
0.042644	1.65535		0.042644	5.14893	0.042644	0.214125
1.28096	2.05658		1.28096	4.4121	1.28096	0.765535
1.79494	2.46205		1.79494	4.88362	1.79494	0.189034
0.042644	2.75702		0.042644	0.250962	0.042644	0.847997
0.555816	0.790772		0.555816	4.88753	0.555816	0.659925
2.40871	1.20789		2.40871	4.27873	2.40871	0.555816
5.34056	3.25852		5.34056	1.04963	5.34056	2.26003
6.22901	3.03738		6.22901	0.933573	6.22901	0.831877
1.45418	2.74846		1.45418	3.15056	1.45418	1.70929
7.58916	5.25286		7.58916	2.67356	7.58916	4.14568
1.07039	2.01436		1.07039	2.38405	1.07039	0.641546
0.226509	1.49569		0.226509	6.50859	0.226509	0.137504
0	2.21101		0	3.25399	0	0.189034
0.263034	1.63227		0.263034	0.400538	0.263034	0.641546
6.33414	1.49569		6.33414	0.454176	6.33414	3.10434
0.056584	0.411426		0.056584	1.14405	0.056584	0.389567
4.77083	2.38681		4.77083	4.91839	4.77083	0.111031
0	0.454176		0	1.63691	0	0.056584
2.0036	3.30305		2.0036	5.08789	2.0036	1.22033
3.6017	2.40599		3.6017	5.97545	3.6017	3.58496
7.35905	4.79442		7.35905	1.5509	7.35905	2.57773
2.21101	2.90689		2.21101	4.26828	2.21101	0.495695
0.097611	1.89142		0.097611	4.72028	0.097611	3.08406
5.0343	2.49314		5.0343	5.21296	5.0343	4.22265
0.400538	1.83592		0.400538	6.6311	0.400538	0.422233
6.27352	4.21878		6.27352	6.36702	6.27352	1
3.64386	0.070389		3.64386	6.37938	3.64386	0.411426
2.88947	2.11103		2.88947	5.51412	2.88947	1.29866
8.80539	5.23228		8.80539	5.41244	8.80539	3.64155
5.72	4.90014		5.72	5.87725	5.72	2.21101
4.75221	3.6311		4.75221	5.80736	4.75221	2.05311
3.2765	2.11103		3.2765	4.32984	3.2765	2.32769
0.941106	0.970854		0.941106	5.51349	0.941106	1.40599
0.748461	2.0036		0.748461	2.14078	0.748461	2.56316
3.66676	3.14893		3.66676	6.16671	3.66676	3.24031
8.15684	2.81967		8.15684	3.74416	8.15684	3.40327
0	2.66448		0	2.54597	0	0.722466
2.23266	2.70487		2.23266	4.27799	2.23266	2.7115
3.05832	2.44361		3.05832	3.4019	3.05832	2.49057
4.52105	3.33342		4.52105	5.03122	4.52105	1.1375
0.475085	4.11103		0.475085	4.28614	0.475085	2.774
0.263034	0.137504		0.263034	3.04614	0.263034	0.137504
4.73877	4.03386		4.73877	1.04264	4.73877	2.87381
10.2984	5.82756		10.2984	4.59455	10.2984	4.23496
0.970854	0.084064		0.970854	5.54844	0.970854	2.63692
1.61353	2.26303		1.61353	6.22265	1.61353	0.432959
3.89821	4.29057		3.89821	5.42425	3.89821	3.18269
0.226509	1.05658		0.226509	5.02414	0.226509	0.704872
0.344828	2.5008		0.344828	4.95187	0.344828	1.86394
2.70487	0.739848		2.70487	4.52795	2.70487	5.15462
6.9364	0.028569		6.9364	1.15056	6.9364	0.014355
0.286881	0.485427		0.286881	1.27501	0.286881	0.613532
0.028569	1.49057		0.028569	3.98185	0.028569	0.85599
0.443607	0.782409		0.443607	3.53481	0.443607	0.111031
0.62293	2.16027		0.62293	0.516015	0.62293	0.042644
3.05311	4.8505		3.05311	4.28244	3.05311	5.15785
1.22033	0.963474		1.22033	3.75382	1.22033	0.344828
0	0.31034		0	4.90304	0	0.070389
1.29278	0.028569		1.29278	2.81147	1.29278	0.189034
0.604071	1.81147		0.604071	2.58976	0.604071	0.545968
4.2426	4.23496		4.2426	4.86443	4.2426	3.18428
0.15056	3.18903		0.15056	3.41549	0.15056	0.594549
4.36036	2.8339		4.36036	6.00495	4.36036	2.49569
2.73335	1.98185		2.73335	3.08066	2.73335	2.64155
0.214125	2.98914		0.214125	1.98185	0.214125	0.411426
5.49249	2.76341		5.49249	2.98914	5.49249	4.77189
2.91073	3.68594		2.91073	4.88411	2.91073	2.08406
2.75061	2.96347		2.75061	5.61618	2.75061	1.73118
3.19377	5.22766		3.19377	5.10936	3.19377	1.01435
9.41502	4.853		9.41502	2.04614	9.41502	4.41143
4.59036	3.1635		4.59036	5.47476	4.59036	1.97085
5.58586	4.75007		5.58586	6.75087	5.58586	4.07382
3.62059	2.36177		3.62059	0.263034	3.62059	0.042644
6.69167	3.21257		6.69167	3.48156	6.69167	3.23266
8.77017	4.37156		8.77017	5.93192	8.77017	3.43829
1.1375	1.0635		1.1375	5.39094	1.1375	0.422233
2.22342	3.7666		2.22342	5.80632	2.22342	0.704872
2.03562	1.40054		2.03562	2.73118	2.03562	0.137504
8.50096	4.1914		8.50096	5.10894	8.50096	3.65421
0.189034	4.13011		0.189034	5.59753	0.189034	3.37574
1	3.22497		1	5.60792	1	0.432959
6.07425	3.93168		6.07425	3.31615	6.07425	2.13093
1.47508	2.66676		1.47508	6.04177	1.47508	0.443607
1.50589	3.63343		1.50589	5.93452	1.50589	2.12763
1.86394	2.31325		1.86394	4.42559	1.86394	0.15056
1.15056	3.08576		1.15056	6.00225	1.15056	0.250962
0.137504	0.333424		0.137504	6.14588	0.137504	0.321928
3.69265	2.48027		3.69265	2.52857	3.69265	1.21412
4.85898	4.17233		4.85898	5.88557	4.85898	2.43563
5.24717	3.26604		5.24717	5.02059	5.24717	4.40327
7.14609	3.51979		7.14609	5.80219	7.14609	3.74631
7.06048	3.17632		7.06048	0.731183	7.06048	5.25852
7.1914	4.62176		7.1914	2.45418	7.1914	2.46989
3.45286	2.93168		3.45286	6.23419	3.45286	1.25701
0.084064	0.214125		0.084064	5.64443	0.084064	0.454176
0.555816	4.04177		0.555816	6.29241	0.555816	0.333424
3.33342	2.41954		3.33342	3.36877	3.33342	0.124328
6.94416	2.12763		6.94416	4.16912	6.94416	0.485427
0.356144	0.056584		0.356144	4.87234	0.356144	0.356144
4.40054	1.1635		4.40054	2.19219	4.40054	0.443607
10.0419	4.09929		10.0419	5.43062	10.0419	4.1177
7.10811	3.50716		7.10811	3.26454	7.10811	4.44095
3.30743	3.07553		3.30743	0.713696	3.30743	2.48027
6.18547	4.53294		6.18547	5.4591	6.18547	2.76765
1.12433	2.04963		1.12433	0.895303	1.12433	0.516015
1.37851	0.565597		1.37851	1.25701	1.37851	0.516015
2.68257	3.35473		2.68257	3.15218	2.68257	0.516015
2.70044	1.73985		2.70044	4.9279	2.70044	0.084064
4.40259	1.15056		4.40259	6.03232	4.40259	1.65077
3.53854	1.49057		3.53854	6.97407	3.53854	3.29719
8.33315	3.88557		8.33315	5.61206	8.33315	1.41143
5.70349	4.34979		5.70349	6.44692	5.70349	2.66903
2.58014	3.61941		2.58014	5.46467	2.58014	1.01435
6.08087	3.63459		6.08087	2.50335	6.08087	0.344828
5.88215	1.26903		5.88215	0.250962	5.88215	3.49825
5.49506	2.66676		5.49506	4.7241	5.49506	0.238787
0.189034	0.163499		0.189034	5.74012	0.189034	0.111031
5.39094	3.9279		5.39094	0.432959	5.39094	2.19535
5.10014	5.16872		5.10014	5.90833	5.10014	4.74362
11.0735	4.86394		11.0735	0.871844	11.0735	4.42559
6.24774	0.748461		6.24774	2.21101	6.24774	5.13545
0.31034	3.56682		0.31034	5.30852	0.31034	0.097611
9.97542	3.32193		9.97542	5.72247	9.97542	3.42358
5.04963	4.68314		5.04963	1.93357	5.04963	4.15947
8.86771	3.80735		8.86771	4.27426	8.86771	3.31034
2.488	2.60881		2.488	4.81813	2.488	3.07211
3.63923	0.782409		3.63923	6.67412	3.63923	0.85599
5.09128	3.50589		5.09128	6.38629	5.09128	3.64155
3.03386	2.55827		3.03386	1.52607	3.03386	0.201634
5.84373	2.16671		5.84373	2.86394	5.84373	3.73118
8.12634	4.25777		8.12634	0.286881	8.12634	3.5741
5.33878	3.38957		5.33878	5.20711	5.33878	0.565597
5.82629	3.13093		5.82629	3.40054	5.82629	0.028569
6.18844	3.59694		6.18844	6.21529	6.18844	3.48285
9.12055	3.5435		9.12055	4.64674	9.12055	3.32625
0.526069	0.678072		0.526069	1.46989	0.526069	0.831877
0.367371	0.111031		0.367371	1.53107	0.367371	0.111031
4.393	3.69822		4.393	6.85262	4.393	1.01435
4.86443	1.11103		4.86443	0.731183	4.86443	4.54473
7.50494	2.32481		7.50494	7.14659	7.50494	3.62293
0.137504	3.67356		0.137504	6.55551	0.137504	0.176323
2.31325	0.85599		2.31325	6.4494	2.31325	0.632268
9.19362	4.36177		9.19362	3.9514	9.19362	4.3978
1.81967	2.96347		1.81967	1.45418	1.81967	1.1375
3.33914	5.55305		3.33914	5.12763	3.33914	1.88752
4.26828	2.65306		4.26828	2.25096	4.26828	2.57046
0.411426	0.464668		0.411426	1.60407	0.411426	0.201634
8.31488	3.55213		8.31488	5.89893	8.31488	3.49953
0.687061	0.286881		0.687061	0.910733	0.687061	0.659925
1.31615	0.632268		1.31615	5.0045	1.31615	0.475085
1.81967	2.53605		1.81967	0.464668	1.81967	0.070389
6.58346	2.73335		6.58346	3.80116	6.58346	3.48156
8.42232	3.66903		8.42232	5.8627	8.42232	3.64616
10.2866	4.33628		10.2866	6.24907	10.2866	5.79986
1.90689	1.81967		1.90689	5.05268	1.90689	0.400538
8.10119	3.45812		8.10119	5.19535	8.10119	5.73254
1.98914	1.49057		1.98914	5.87209	1.98914	0.097611
4.57652	1.27501		4.57652	0.454176	4.57652	1.40054
0.163499	0.238787		0.163499	5.59335	0.163499	0.739848
0.238787	0.298658		0.238787	5.06221	0.238787	0.704872
3.56194	2.07724		3.56194	4.43962	3.56194	1.95977
0.238787	2.08406		0.238787	1.5008	0.238787	0.367371
2.91648	1.14405		2.91648	0.432959	2.91648	4.84046
0.782409	0.389567		0.782409	4.69933	0.782409	0.250962
0.263034	0.782409		0.263034	2.40327	0.263034	3.09085
0.176323	0.189034		0.176323	3.60881	0.176323	2.16671
5.58676	3.98732		5.58676	6.02215	5.58676	1.09085
0.992768	1.9486		0.992768	3.65535	0.992768	0.097611
0.422233	2.48285		0.422233	0.956057	0.422233	1.69599
10.5806	4.01078		10.5806	0.765535	10.5806	4.88117
5.59813	4.42358		5.59813	4.94533	5.59813	0.659925
1.83996	4.49185		1.83996	2.19535	1.83996	2.08746
0.189034	1.40054		0.189034	5.05094	0.189034	0.773996
1.71809	1.34483		1.71809	1.5008	1.71809	0.807355
1	0.575312		1	5.95024	1	0.238787
1.80736	1.64155		1.80736	5.33664	1.80736	1.50589
0.378512	0.594549		0.378512	4.57954	0.378512	0.773996
7.17193	2.8679		7.17193	3.37016	7.17193	4.32697
6.07468	5.08534		6.07468	3.43563	6.07468	2.56316
0.757023	2.11437		0.757023	4.72083	0.757023	0.799087
0.201634	0.028569		0.201634	1.81967	0.201634	0.356144
6.91361	4.30159		6.91361	3.6017	6.91361	3.23726
0.970854	1.33342		0.970854	3.44228	0.970854	0.495695
4.70044	2.7115		4.70044	5.75889	4.70044	0.163499
5.74846	5.23304		5.74846	5.08279	5.74846	3.36877
4.03122	4.38543		4.03122	4.44162	4.03122	2.21101
1.04264	2.11437		1.04264	5.70874	1.04264	0.411426
2.96347	1.67356		2.96347	3.16189	2.96347	0.263034
1.65535	3.15056		1.65535	4.50271	1.65535	3.75809
0.669027	0.485427		0.669027	5.04702	0.669027	1.32193
0.505891	0.214125		0.505891	5.57228	0.505891	1.15704
3.06867	3.2854		3.06867	4.70929	3.06867	2.774
0.189034	0.956057		0.189034	5.51916	0.189034	1.07724
4.2032	3		4.2032	5.05918	4.2032	3.52857
0.250962	1.58976		0.250962	6.80284	0.250962	0.704872
0.263034	0.411426		0.263034	2.488	0.263034	0.111031
7.72649	5.27053		7.72649	5.64789	7.72649	3.66221
0.298658	0.879706		0.298658	7.78175	0.298658	1.22033
7.66541	2.38957		7.66541	1.90689	7.66541	4.12598
2.5509	4.36597		2.5509	3.60644	2.5509	2.20477
10.1998	4.70542		10.1998	4.14486	10.1998	4.59335
0	0.799087		0	4.60407	0	0.275007
2.61589	2.62527		2.61589	3.41954	2.61589	0.344828
2.71589	3.38543		2.71589	4.33342	2.71589	0.097611
3.89918	3.79597		3.89918	1.92979	3.89918	3.47249
3.45943	0.565597		3.45943	4.8846	3.45943	0.970854
0.014355	0.176323		0.014355	5.21413	0.014355	0.15056
0.124328	0.111031		0.124328	4.40463	0.124328	0.097611
6.93109	2.88753		6.93109	2.73552	6.93109	0.765535
0.070389	1.60881		0.070389	0.137504	0.070389	0.201634
5.25058	5.74228		5.25058	3.92315	5.25058	2.98368
4.01257	0.669027		4.01257	5.63401	4.01257	1.848
2.86987	0.831877		2.86987	6.16611	2.86987	0.713696
0.111031	2.61589		0.111031	3.83289	0.111031	0.124328
6.99718	4.63169		6.99718	5.45418	6.99718	2.51853
0.411426	0.124328		0.411426	6.90099	0.411426	0.83996
0.613532	2.88947		0.613532	0.028569	0.613532	0.286881
2.11103	1.59932		2.11103	3.90014	2.11103	0.201634
9.05192	3.87578		9.05192	5.57652	9.05192	3.9486
11.6176	5.53138		11.6176	5.43962	11.6176	4.59156
6.50255	3.64846		6.50255	4.75061	6.50255	3.01614
0.575312	2.68257		0.575312	5.46303	0.575312	2.46989
4.84649	3.14405		4.84649	0.201634	4.84649	1.96717
5.59723	3.88947		5.59723	0.594549	5.59723	1.49569
0.163499	0.042644		0.163499	4.10518	0.163499	0.15056
0.378512	3.76871		0.378512	4.07039	0.378512	3.48414
3.61117	1.37851		3.61117	2.53605	3.61117	3.33199
8.11114	2.23573		8.11114	5.12557	8.11114	3.87676
9.6243	2.5435		9.6243	5.42995	9.6243	3.03034
3.93263	2.16671		3.93263	3.8339	3.93263	2.42761
7.55643	3.54473		7.55643	3.99729	7.55643	2.88557
1.20163	0.137504		1.20163	6.05463	1.20163	0.344828
0.389567	0.613532		0.389567	7.04516	0.389567	0.028569
6.67002	3.31179		6.67002	3.67016	6.67002	1.79494
5.77294	3.62877		5.77294	2.53854	5.77294	3.51096
2.74846	3.91073		2.74846	0.275007	2.74846	1.20163
3.61353	2.70929		3.61353	5.27575	3.61353	0.454176
11.2785	4.48349		11.2785	4.93074	11.2785	4.26828
4.1819	3.76765		4.1819	4.86493	4.1819	2.71589
2.08066	2.0072		2.08066	4.74953	2.08066	2.59694
3.6311	1.82375		3.6311	6.15482	3.6311	4.44758
6.97166	3.51096		6.97166	4.67412	6.97166	4.75168
0.464668	2.86987		0.464668	4.7126	0.464668	1.0072
5.92647	4.23343		5.92647	0.189034	5.92647	3.17313
6.82299	2.854		6.82299	4.51791	6.82299	2.45154
4.14323	2.60881		4.14323	2.23266	4.14323	0.62293
6.69599	2.99458		6.69599	3.08066	6.69599	0.238787
6.47411	2.68257		6.47411	5.36001	6.47411	2.4489
0.422233	0.344828		0.422233	5.56682	0.422233	0.641546
3.17951	3.60881		3.17951	1.30451	3.17951	0.263034
3.43563	3.35191		3.43563	5.87061	3.43563	1.04264
1.29866	2.47249		1.29866	0.238787	1.29866	0.250962
0.014355	0.443607		0.014355	1.91073	0.014355	1.68706
0.83996	0.333424		0.83996	4.26003	0.83996	0.378512
1.04264	0.275007		1.04264	2.68706	1.04264	0.201634
5.0387	3.18903		5.0387	2.27202	5.0387	2.66448
5.00135	4.55336		5.00135	3.47638	5.00135	4.9644
2.82985	2.85599		2.82985	5.66903	2.82985	0.124328
11.2712	4.1416		11.2712	4.70653	11.2712	4.36036
5.86146	4.62819		5.86146	4.17951	5.86146	4.58556
0	0.124328		0	4.16832	0	0.632268
1.0072	4.09761		1.0072	5.8089	1.0072	3.24793
3.95047	2.62761		3.95047	2.27501	3.95047	4.21101
3.00899	2.66221		3.00899	5.41853	3.00899	0.933573
7.08449	3.44361		7.08449	1.94111	7.08449	3.37156
5.91385	3.05832		5.91385	3.1811	5.91385	1.45418
0	0.15056		0	5.5097	0	0.226509
2.22033	1.24489		2.22033	2.98914	2.22033	0.669027
3.85798	2.50589		3.85798	2.52105	3.85798	1.67807
1.67807	4.05918		1.67807	7.02669	1.67807	1.0072
0.389567	0.084064		0.389567	5.39232	0.389567	0.070389
5.50494	3.96901		5.50494	5.95396	5.50494	0.084064
5.88777	3.90977		5.88777	3.74524	5.88777	4.68538
1.31034	0.695994		1.31034	5.43896	1.31034	4.87627
1.70487	1.7866		1.70487	6.03628	1.70487	0.31034
4.42559	3.18428		4.42559	6.03672	4.42559	2.41414
4.98869	4.70487		4.98869	4.69432	4.98869	2.34483
5.32589	2.53107		5.32589	4.65306	5.32589	3.71918
0.389567	0.056584		0.389567	6.0648	0.389567	0.15056
0.545968	0.238787		0.545968	5.11686	0.545968	0.584963
9.70053	4.36387		9.70053	1.60881	9.70053	4.05485
10.9559	3.81967		10.9559	2.28688	10.9559	4.07125
9.0601	4.16832		9.0601	5.86716	9.0601	4.46663
6.16892	2.51853		6.16892	4.7366	6.16892	2.21101
9.16774	3.90881		9.16774	5.81686	9.16774	3.0018
4.65019	2.49314		4.65019	3.05137	4.65019	2.64846
1.5656	2.57289		1.5656	2.66221	1.5656	3.11936
0.014355	0.028569		0.014355	5.6094	0.014355	0.042644
3.4343	4.63575		3.4343	5.91145	3.4343	4.41007
3.93357	3.79077		3.93357	5.19967	3.93357	0.731183
1.91457	1.852		1.91457	4.82528	1.91457	1.28096
6.30195	3.34341		6.30195	1.02857	6.30195	3.42223
2.16027	3.28983		2.16027	5.29829	2.16027	1.46989
0.298658	0.097611		0.298658	2.14731	0.298658	0.275007
2.20477	2.90497		2.20477	6.9578	2.20477	0.014355
0.333424	2.91265		0.333424	5.89263	0.333424	0.15056
2.80323	1.76128		2.80323	4.86394	2.80323	1.0072
9.86295	0.757023		9.86295	5.52857	9.86295	3.72901
1.64155	1.9782		1.64155	3.19062	1.64155	0.286881
0.956057	0.056584		0.956057	6.04111	0.956057	0.111031
3.08236	1.61824		3.08236	4.72247	3.08236	3.61941
6.5489	4.11936		6.5489	4.48543	6.5489	2.53605
1.7137	0.163499		1.7137	5.09466	1.7137	0.613532
5.854	3.57289		5.854	1.22033	5.854	3.85
3.15704	2.95606		3.15704	1.33342	3.15704	1.90304
5.03958	2.73118		5.03958	4.59813	5.03958	0.250962
0.286881	0.042644		0.286881	5.41312	0.286881	0.526069
3.68706	2.74416		3.68706	6.79688	3.68706	3
0.739848	1.70044		0.739848	6.47687	0.739848	0.097611
6.46467	4.0268		6.46467	5.06134	6.46467	3.34625
3.04614	3.57046		3.04614	4.14568	3.04614	1.3505
0.097611	2.80529		0.097611	6.1102	0.097611	0.263034
7.75061	2.50589		7.75061	0.704872	7.75061	3.51475
6.05832	4.56986		6.05832	4.91361	6.05832	1.52105
0.594549	3.43029		0.594549	0.356144	0.594549	2.54102
7.43137	4.56133		7.43137	5.26903	7.43137	3.86691
0.739848	0.356144		0.739848	4.03386	0.739848	0.344828
4.47768	1.73552		4.47768	0.475085	4.47768	0.765535
3.10601	0.516015		3.10601	1.69599	3.10601	0.263034
6.58014	1.20163		6.58014	5.2724	6.58014	3.79181
1.35614	2.95791		1.35614	0.815575	1.35614	1.49569
0.516015	0.176323		0.516015	3.41414	0.516015	3.0036
5.85599	3.38957		5.85599	3.91361	5.85599	5.65621
5.05875	2.65306		5.05875	3.848	5.05875	0.545968
0.070389	0.097611		0.070389	5.52576	0.070389	0.367371
5.09803	0.613532		5.09803	0.678072	5.09803	0.070389
9.27445	5.44791		9.27445	6.50843	9.27445	5.15866
10.1122	4.51728		10.1122	3.89627	10.1122	4.52419
9.11025	2.93357		9.11025	6.67455	9.11025	3.41278
11.0711	4.49313		11.0711	5.6585	11.0711	2.68482
1.65535	1.87184		1.65535	2.83592	1.65535	0.992768
4.48671	1.7137		4.48671	0.575312	4.48671	2.8953
8.13837	4.19298		8.13837	1.76977	8.13837	2.86592
6.2317	5.5659		6.2317	6.52607	6.2317	3.03386
9.17185	5.07938		9.17185	3.14893	9.17185	4.50144
0.722466	0.641546		0.722466	0.176323	0.722466	0.356144
8.67599	3.34056		8.67599	1.42761	8.67599	5.749
0	0.250962		0	4.68818	0	0.042644
7.0846	3.36877		7.0846	0.378512	7.0846	3.1635
4.8166	3.72137		4.8166	3.59813	4.8166	3.65306
2.06695	2.69822		2.06695	5.53761	2.06695	2.02503
1.848	1.04963		1.848	4.68257	1.848	0.978196
2.31904	2.87381		2.31904	5.44294	2.31904	3.4019
6.45845	3.26754		6.45845	5.849	6.45845	5.14078
6.08683	4.42425		6.08683	6.65693	6.08683	1.57531
5.64126	1.84398		5.64126	2.81762	5.64126	3.97636
2.28983	1.99639		2.28983	5.41583	2.28983	0.925999
0.201634	2.55582		0.201634	5.55275	0.201634	0.111031
0.650765	0.443607		0.650765	4.44626	0.650765	0.475085
1.22651	3.45549		1.22651	4.16591	1.22651	1.62761
3.47768	3.2555		3.47768	6.78921	3.47768	3.79181
6.69891	4.0365		6.69891	6.30415	6.69891	0.565597
2.46467	2.66448		2.46467	0.389567	2.46467	0.536053
1.61824	2.21723		1.61824	4.10014	1.61824	0.505891
0.333424	1.98914		0.333424	5.55582	0.333424	0.056584
7.42215	1.26903		7.42215	5.87971	7.42215	0.505891
1.30451	0.097611		1.30451	6.04614	1.30451	0.422233
9.55495	4.01257		9.55495	7.07575	9.55495	4.09508
1.1177	1.52105		1.1177	5.49249	1.1177	0.704872
10.1608	4.75221		10.1608	5.13381	10.1608	4.44692
2.58976	3.02503		2.58976	0.887525	2.58976	3.65306
0.176323	0.250962		0.176323	6.1631	0.176323	0.704872
3.29572	1.58014		3.29572	8.05648	3.29572	0.028569
0.321928	3.10936		0.321928	6.26679	0.321928	0.823749
0.443607	0.584963		0.443607	3.99639	0.443607	0.925999
1.20163	2.14731		1.20163	4.27724	1.20163	0.097611
6.14568	4.33342		6.14568	1.61824	6.14568	2.57289
5.25965	3.96347		5.25965	4.75596	5.25965	5.30049
9.80887	2.27799		9.80887	6.69877	9.80887	2.50589
0.15056	0.097611		0.15056	1.1635	0.15056	0.704872
7.12381	2.99096		7.12381	5.65821	7.12381	3.47119
2.38405	2.21413		2.38405	0.641546	2.38405	0.028569
0.799087	4.28021		0.799087	5.14771	0.799087	0.422233
2.66448	3.58376		2.66448	4.70598	2.66448	2.08066
2.73769	5.05658		2.73769	4.70376	2.73769	3.12598
0.028569	2.70487		0.028569	3.27501	0.028569	1.0635
2.65535	2.31904		2.65535	6.06393	2.65535	1.0072
2.88166	3.84599		2.88166	2.79077	2.88166	4.39094
8.00551	2.49057		8.00551	2.31034	8.00551	3.58857
0.214125	0.757023		0.214125	6.34696	0.214125	1.09085
0.070389	0.189034		0.070389	5.29425	0.070389	0.31034
0.650765	0.584963		0.650765	5.46074	0.650765	1.80323
0	0.879706		0	3.51853	0	0.014355
6.39283	3.74308		6.39283	3.21568	6.39283	2.67129
2.5509	3.02857		2.5509	4.20477	2.5509	3.04439
4.98368	2.66448		4.98368	5.30451	4.98368	0.85599
3.65076	2.3505		3.65076	5.41244	3.65076	3.904
0.526069	1.26303		0.526069	3.63807	0.526069	1.12433
0.536053	2.28688		0.536053	5.40667	0.536053	1.80736
5.82477	4.17712		5.82477	0.722466	5.82477	0.475085
7.24669	2.14405		7.24669	5.53698	7.24669	1.18903
7.64933	3.71809		7.64933	2.9782	7.64933	0.485427
7.87289	4.8674		7.87289	4.27873	7.87289	5.08789
4.87036	0.85599		4.87036	4.86493	4.87036	3.62527
7.47849	3.79181		7.47849	0.731183	7.47849	2.46989
3.6017	1.40054		3.6017	6.031	3.6017	0.584963
0.15056	0.823749		0.15056	6.13894	0.15056	0.516015
5.11145	1.53107		5.11145	4.68762	5.11145	4.02945
7.23237	4.10182		7.23237	6.17851	7.23237	3.45286
4.61117	3.66221		4.61117	2.12763	4.61117	0.594549
7.16922	5.06091		7.16922	5.73715	7.16922	3.42223
5.0018	3.12598		5.0018	2.67129	5.0018	0.650765
9.75402	3.59335		9.75402	5.02547	9.75402	0.084064
7.14466	3.65191		7.14466	2.41143	7.14466	2.98185
0	0.014355		0	1.71809	0	0.042644
4.9814	5.06307		4.9814	0.871844	4.9814	2.33914
7.27025	4.11686		7.27025	2.37851	7.27025	2.41684
7.22824	4.23955		7.22824	2.95233	7.22824	4.55459
7.12794	2.25096		7.12794	5.40497	7.12794	2.41684
10.7227	3.3978		10.7227	7.07863	10.7227	4.12019
0.378512	1.852		0.378512	1.70044	0.378512	2.12101
3.35473	3.14568		3.35473	5.67863	3.35473	5.10601
0.411426	1.12433		0.411426	4.63169	0.411426	0.604071
0.31034	0.831877		0.31034	2.26604	0.31034	0.650765
9.57794	4.2891		9.57794	6.01792	9.57794	4.63749
0.124328	0.201634		0.124328	0.367371	0.124328	0.422233
9.78346	1.848		9.78346	6.78057	9.78346	5.03782
8.32066	5.40293		8.32066	4.84348	8.32066	3.74308
2.23879	2.43296		2.23879	5.09255	2.23879	3.09255
4.42223	3.11603		4.42223	2.26003	4.42223	1.07039
8.19535	3.78973		8.19535	3.2342	8.19535	4.85
0.823749	2.27202		0.823749	4.61589	0.823749	1.13093
0.356144	0.687061		0.356144	5.40395	0.356144	0.084064
7.75034	4.13668		7.75034	4.82883	7.75034	3.59096
1.26303	1.79909		1.26303	5.47865	1.26303	0.250962
8.488	3.7666		8.488	0.321928	8.488	3.14241
2.78241	2.59694		2.78241	2.99458	2.78241	0.084064
8.71565	4.25777		8.71565	5.93452	8.71565	3.48285
4.49378	2.8679		4.49378	4.60229	4.49378	2.73335
1.76128	2.71809		1.76128	1.72683	1.76128	3.86592
2.15704	1		2.15704	2.93168	2.15704	1.74416
0.286881	0.863938		0.286881	5.45187	0.286881	0.070389
5.48059	2.88166		5.48059	2.848	5.48059	3.13422
0.454176	0.056584		0.454176	5.15987	0.454176	0.298658
7.14354	4.22805		7.14354	1.69599	7.14354	1.44361
0.275007	0.042644		0.275007	5.03562	0.275007	0.367371
3.66335	2.09761		3.66335	0.704872	3.66335	0.85599
5.83643	3.33485		5.83643	2.90881	5.83643	2.56316
0.226509	4.02592		0.226509	5.55888	0.226509	0.757023
10.1297	4.06264		10.1297	5.55765	10.1297	2.73985
1.9222	2.7845		1.9222	8.4358	1.9222	0.526069
11.7498	4.41549		11.7498	2.11769	11.7498	4.60051
2.62994	2.5008		2.62994	1.33342	2.62994	0.903038
0.992768	2.11103		0.992768	4.88215	0.992768	2.24184
1.09085	2.93734		1.09085	0.084064	1.09085	0.443607
2.02148	3.31759		2.02148	6.10182	2.02148	2.08406
4.76977	2.19219		4.76977	0.014355	4.76977	3.73335
0.321928	0.214125		0.321928	3.40463	0.321928	2.03914
4.1334	5.31796		4.1334	5.44162	4.1334	2.56316
0.201634	1.91457		0.201634	0.367371	0.201634	0.956057
1.18269	0.275007		1.18269	0.298658	1.18269	0.056584
1.13093	2.7866		1.13093	2.38128	1.13093	1.80323
7.47905	3.69599		7.47905	5.64068	7.47905	0.356144
7.64523	4.67694		7.64523	5.27984	7.64523	0.226509
1.23266	2.60644		1.23266	1.33914	1.23266	0.722466
2.45418	0.831877		2.45418	4.42089	2.45418	0.124328
6.4187	5.20085		6.4187	5.88582	6.4187	2.97085
1.05658	0.286881		1.05658	0.584963	1.05658	0.176323
6.96578	4.53294		6.96578	0.454176	6.96578	4.86146
0.731183	1.02148		0.731183	4.35685	0.731183	0.070389
4.25852	2.82375		4.25852	6.26847	4.25852	0.970854
7.21772	1.25701		7.21772	2.32769	7.21772	0.124328
9.29786	3.96347		9.29786	5.95977	9.29786	3.52857
0.042644	0.344828		0.042644	5.28725	0.042644	0.214125
6.08491	4.90448		6.08491	5.81737	6.08491	0.604071
0.443607	3.04789		0.443607	4.56621	0.443607	4.39712
6.74806	4.02592		6.74806	5.21762	6.74806	3.49825
10.8652	4.0917		10.8652	4.94533	10.8652	4.15381
5.59574	2.95977		5.59574	0.704872	5.59574	2.24489
0.389567	1.12433		0.389567	1.73985	0.389567	0.815575
6.89494	3.31034		6.89494	6.24012	6.89494	4.02148
5.91815	4.11437		5.91815	4.68538	5.91815	3.36737
3.45812	1.36737		3.45812	0.378512	3.45812	1.99639
2.72683	2.75916		2.72683	1.22033	2.72683	2.78241
2.7761	2.29278		2.7761	6.65835	2.7761	1.49057
0.298658	1.21412		0.298658	3.26153	0.298658	0.604071
2.52356	0.790772		2.52356	4.75809	2.52356	2.50843
5.21956	3.488		5.21956	4.34483	5.21956	1.7866
0.238787	1.852		0.238787	6.43279	0.238787	0.871844
3.92695	3.69933		3.92695	1.11103	3.92695	2.20477
0.344828	0.042644		0.344828	4.08321	0.344828	0.687061
3.06523	2.67129		3.06523	3.18269	3.06523	0.970854
3.93074	2.88753		3.93074	1.1375	3.93074	3.16027
1.42223	3.35755		1.42223	1.28688	1.42223	2.48285
2.44095	5.26078		2.44095	1.38957	2.44095	0.526069
4.00988	3.23726		4.00988	5.45615	4.00988	1.23879
0.925999	0.097611		0.925999	0.400538	0.925999	1
4.95931	2.51096		4.95931	2.64386	4.95931	0.799087
0.333424	0.286881		0.333424	5.62322	0.333424	0.367371
4.23496	3.60644		4.23496	5.31723	4.23496	1.09085
0	1.33342		0	4.05485	0	0.111031
5.87529	4.49121		5.87529	6.71342	5.87529	0.584963
8.22502	3.36737		8.22502	0.604071	8.22502	3.04963
0.163499	0.321928		0.163499	0.189034	0.163499	0.163499
1.22033	0.084064		1.22033	0.659925	1.22033	0.422233
0.432959	0.137504		0.432959	4.98231	0.432959	0.632268
1.7866	2.6017		1.7866	4.74739	1.7866	1.08406
4.97269	1.21412		4.97269	6.21432	4.97269	3.07382
0	0		0	4.46597	0	0.084064
5.57471	3.51475		5.57471	5.92908	5.57471	2.06695
1.92979	3.88362		1.92979	5.07382	1.92979	0.895303
0	0.604071		0	2.18903	0	0.042644
0.214125	0.400538		0.214125	3.39232	0.214125	0.641546
4.52168	3.96625		4.52168	4.06695	4.52168	2.90304
8.07884	3.87381		8.07884	5.98345	8.07884	3.95884
1.95606	2.89336		1.95606	3.45681	1.95606	2.64846
2.65764	4.50399		2.65764	5.53169	2.65764	4.29572
5.1206	2.9222		5.1206	7.33083	5.1206	3.73552
4.46271	4.01436		4.46271	7.38146	4.46271	2.22959
0.084064	3.58376		0.084064	4.7845	0.084064	3.42089
2.01078	1.81147		2.01078	4.22805	2.01078	2.27799
3.20789	3.13093		3.20789	6.90014	3.20789	0.214125
0.226509	0.070389		0.226509	4.95187	0.226509	0.464668
8.26894	1.20789		8.26894	1.85599	8.26894	0.704872
5.87209	4.38819		5.87209	6.23974	5.87209	4.21645
3.41278	2.60881		3.41278	4.08661	3.41278	0.111031
1.93357	0.344828		1.93357	6.2854	1.93357	0.111031
3.98277	3.40735		3.98277	1.47508	3.98277	0.344828
5.33807	3.26153		5.33807	4.97499	5.33807	2.63459
0.641546	0.495695		0.641546	4.55765	0.641546	1.42223
4.14486	1.62761		4.14486	6.51065	4.14486	4.75114
5.09677	4.86987		5.09677	1.04963	5.09677	0.505891
4.68538	4.25626		4.68538	6.21315	4.68538	1.73118
0.263034	0.286881		0.263034	5.77294	0.263034	0.545968
6.23208	3.1375		6.23208	6.71081	6.23208	1.68706
2.93734	0.933573		2.93734	4.50653	2.93734	0.097611
0.042644	1.95233		0.042644	1.39506	0.042644	1.4489
6.23477	2.33914		6.23477	4.73552	6.23477	2.07039
0.333424	3.1375		0.333424	5.58376	0.333424	0.678072
5.99322	4.35332		5.99322	4.3427	5.99322	3.926
0.464668	2.88557		0.464668	6.35244	0.464668	0.263034
0.15056	0.042644		0.15056	3.61589	0.15056	1.0635
5.0648	4.24565		5.0648	0.925999	5.0648	0.163499
4.95652	3.10936		4.95652	5.12846	4.95652	3.08746
7.78764	4.1127		7.78764	5.72083	7.78764	3.35755
6.6327	4.91361		6.6327	5.12681	6.6327	3.28096
0.495695	2.9486		0.495695	1.29866	0.495695	1.23879
0.238787	0.084064		0.238787	6.06975	0.238787	0.356144
0.790772	0.15056		0.790772	6.27612	0.790772	1.49057
5.13545	3.6241		5.13545	3.62644	5.13545	1.97085
4.99231	2.69377		4.99231	5.0492	4.99231	1.67356
2.58976	4.26379		2.58976	5.05224	2.58976	4.11187
2.9241	4.1375		2.9241	4.42895	2.9241	0.85599
6.77413	5.25286		6.77413	1.34483	6.77413	2.76553
3.24641	2.36177		3.24641	1.80736	3.24641	0.275007
1.27501	2.55827		1.27501	0.263034	1.27501	3.39232
2.19535	1.59455		2.19535	4.853	2.19535	1.18269
2.79285	1.68706		2.79285	1.24489	2.79285	2.94486
4.79701	3.99639		4.79701	3.30451	4.79701	0.014355
0.948601	2.49057		0.948601	3.24641	0.948601	0.555816
6.06931	2.74846		6.06931	5.41176	6.06931	1.35614
5.74416	4.83441		5.74416	3.79701	5.74416	0.695994
6.92588	4.83036		6.92588	4.65019	6.92588	5.05007
0.389567	1.01435		0.389567	3.76977	0.389567	1.64155
1.83188	1.60407		1.83188	5.40156	1.83188	3.75809
1.61353	1.56072		1.61353	3.59216	1.61353	1.12433
6.25286	3.37295		6.25286	0.641546	6.25286	3.64731
0.286881	0.226509		0.286881	5.63198	0.286881	0.823749
1.25096	3.57289		1.25096	0.970854	1.25096	3.80323
9.82931	3.42895		9.82931	4.8748	9.82931	0.454176
2.83794	4.2555		2.83794	5.80038	2.83794	3.27799
0.687061	0.505891		0.687061	5.8515	0.687061	1.36177
5.10476	2.45681		5.10476	5.05702	5.10476	3.80323
1.93734	0.137504		1.93734	5.44791	1.93734	0.584963
7.9892	1.63691		7.9892	2.74631	7.9892	2.86592
0.214125	0.176323		0.214125	5.44989	0.214125	0.137504
0.704872	1.70487		0.704872	3.17951	0.704872	0.970854
6.94017	4.10936		6.94017	2.39232	6.94017	1.83592
3.41549	1.85599		3.41549	5.26115	3.41549	1.0072
3.95791	2.72247		3.95791	5.24527	3.95791	1.61353
0.443607	0.097611		0.443607	6.22555	0.443607	0.545968
2.61353	2.89142		2.61353	3.21413	2.61353	2.16993
10.6017	4.18507		10.6017	5.10392	10.6017	4.39506
2.64846	1.03562		2.64846	5.31361	2.64846	1.24489
10.2169	4.28688		10.2169	5.28429	10.2169	3.89239
2.15056	0.992768		2.15056	0.695994	2.15056	0.333424
0.137504	0.014355		0.137504	6.43212	0.137504	0.137504
4.48671	2.53605		4.48671	4.35473	4.48671	2.50335
3.35473	4.03386		3.35473	5.97154	3.35473	6.09908
10.7635	4.09845		10.7635	6.09571	10.7635	3.73227
0.454176	0.111031		0.454176	5.03826	0.454176	1.18269
7.7445	4.88411		7.7445	4.15137	7.7445	2.79701
7.47824	4.26153		7.47824	3.05485	7.47824	3.42895
0.432959	1.05658		0.432959	0.31034	0.432959	1.08406
6.06393	3.99548		6.06393	0.847997	6.06393	1.10434
5.02325	2.42223		5.02325	5.76235	5.02325	4.35403
1.83188	2.90881		1.83188	4.26228	1.83188	1.85997
0.704872	0.137504		0.704872	4.26454	0.704872	1.68706
5.23802	2.98185		5.23802	0.400538	5.23802	1.81967
0.111031	2.37295		0.111031	5.7126	0.111031	0.604071
4.57289	3.37851		4.57289	5.97842	4.57289	0.238787
0.321928	0.495695		0.321928	6.42744	0.321928	0.575312
3.75275	2.34767		3.75275	2.6017	3.75275	2.23266
7.90141	4.70321		7.90141	1.15704	7.90141	3.54473
9.78143	4.99684		9.78143	4.69989	9.78143	4.33056
0.238787	0.176323		0.238787	4.92742	0.238787	0.925999
4.28021	1.9782		4.28021	1.52607	4.28021	3.8885
2.11769	2.33342		2.11769	2.03562	2.11769	1.16993
6.85499	3.49185		6.85499	4.55582	6.85499	3.98914
2.4489	6.90797		2.4489	2.31904	2.4489	3.26303
0.097611	2.57046		0.097611	5.24489	0.097611	1.04963
7.18497	2.75702		7.18497	5.73091	7.18497	3.77505
1.36737	0.545968		1.36737	5.02237	1.36737	0.250962
2.87381	2.93357		2.87381	4.93593	2.87381	3.47508
5.62615	4.76871		5.62615	4.26754	5.62615	0.831877
6.64746	3.92125		6.64746	3.41684	6.64746	2.28392
1.15056	0.807355		1.15056	3.8339	1.15056	3.67469
6.7097	2.75489		6.7097	4.70266	6.7097	2.68257
0.948601	0.321928		0.948601	5.67384	0.948601	2.04264
6.09972	2.79285		6.09972	3.52482	6.09972	3.06523
0.687061	0.344828		0.687061	3.9486	0.687061	1.36737
7.53722	1.81147		7.53722	4.02414	7.53722	0.056584
3.43029	3.28392		3.43029	5.71094	3.43029	0.632268
7.0421	3.19692		7.0421	6.0505	7.0421	2.86592
6.90207	4.19771		6.90207	4.1035	6.90207	4.18587
0.632268	0.650765		0.632268	4.86888	0.632268	0.765535
7.97355	4.6605		7.97355	4.8334	7.97355	4.41616
6.64904	4.46597		6.64904	2.62059	6.64904	4.69655
8.76557	4.74524		8.76557	1.76977	8.76557	3.76128
0.485427	2.91648		0.485427	5.21956	0.485427	0.941106
1.49569	4.36387		1.49569	4.774	1.49569	3.48414
3.58616	3.60051		3.58616	0.275007	3.58616	1
4.69877	3.4343		4.69877	0.378512	4.69877	3.46467
4.13011	2.08066		4.13011	1.72683	4.13011	1.03562
1.21412	0.773996		1.21412	4.11686	1.21412	0.124328
6.89348	2.43029		6.89348	3.67243	6.89348	2.926
1.87578	2.44095		1.87578	4.43095	1.87578	0.189034
0.014355	0.298658		0.014355	2.85997	0.014355	0.201634
1.67356	1.02857		1.67356	4.70487	1.67356	0.443607
3.71039	3.17951		3.71039	4.74846	3.71039	1.42223
4.07981	4.40531		4.07981	5.5659	4.07981	2.59932
0.555816	2.79285		0.555816	1.50589	0.555816	1.97085
1.28688	3.19377		1.28688	5.98231	1.28688	0.286881
6.4822	3.41954		6.4822	4.13996	6.4822	3.34767
6.04702	5.24146		6.04702	5.61029	6.04702	4.35966
0.807355	2.88166		0.807355	5.42995	0.807355	3.79701
0.400538	0.124328		0.400538	5.57561	0.400538	1.74846
0.432959	1.66448		0.432959	7.39575	0.432959	0.422233
5.14241	1.57531		5.14241	4.35896	5.14241	2.09761
5.04483	3.76553		5.04483	6.59515	5.04483	1.34483
5.78162	3.25248		5.78162	6.14914	5.78162	0.632268
3.52857	3.82273		3.52857	3.77189	3.52857	1.76128
3.23113	2.79701		3.23113	1.15704	3.23113	3.83592
1.48026	2.38405		1.48026	1.774	1.48026	0.286881
2.61353	2.49569		2.61353	3.36177	2.61353	0.970854
6.44278	4.03474		6.44278	4.07125	6.44278	2.24184
2.75061	2.31615		2.75061	6.88423	2.75061	1.72683
3.23266	2.74846		3.23266	0.782409	3.23266	0.879706
2.19849	0.111031		2.19849	1.16993	2.19849	0.641546
7.36001	2.7866		7.36001	6.78241	7.36001	1.77821
2.7761	3.02148		2.7761	2.37295	2.7761	0.014355
3.81455	3.44228		3.81455	6.54024	3.81455	0.042644
5.97361	1.852		5.97361	6.10643	5.97361	0.070389
6.10894	4.63692		6.10894	6.31958	6.10894	3.2342
5.64904	3.26754		5.64904	4.3799	5.64904	2.8953
7.79584	3.64501		7.79584	2.03914	7.79584	1.25096
9.76217	2.96162		9.76217	4.14812	9.76217	2.05311
8.11868	4.86592		8.11868	3.9542	8.11868	4.95
2.34767	3.56682		2.34767	5.75275	2.34767	0.695994
5.80787	1.81147		5.80787	5.48575	5.80787	4.38612
0.454176	1.9782		0.454176	4.94813	0.454176	0.650765
0.344828	0.575312		0.344828	4.69933	0.344828	0.367371
0.226509	0.111031		0.226509	4.53045	0.226509	0.516015
5.75275	3.76022		5.75275	4.16189	5.75275	2.15056
4.09001	3.83794		4.09001	5.15178	4.09001	0.475085
0	0.214125		0	5.1127	0	0.83996
0.111031	0.895303		0.111031	5.01168	0.111031	0.238787
4.90929	3.12433		4.90929	4.90833	4.90929	1.59932
0.773996	0.594549		0.773996	5.8525	0.773996	0.963474
7.28596	4.09508		7.28596	3.01792	7.28596	3.18587
2.94111	3.28836		2.94111	3.79597	2.94111	3.04789
0.378512	0.333424		0.378512	6.14873	0.378512	2.07724
6.20026	3.58616		6.20026	1.9222	6.20026	3.43962
7.56674	3.67356		7.56674	2.7115	7.56674	3.46467
1.12433	2.87774		1.12433	1.53107	1.12433	1.53605
0.275007	0.863938		0.275007	0.31034	0.275007	0.62293
2.11769	1.774		2.11769	5.08321	2.11769	0.948601
6.27352	3.30743		6.27352	4.16912	6.27352	4.17393
6.63967	3.18269		6.63967	6.67058	6.63967	5.05355
5.79286	2.09761		5.79286	5.70487	5.79286	3.78031
9.86405	4.77136		9.86405	6.36142	9.86405	3.57046
2.22959	2.87184		2.22959	6.21004	2.22959	3.91648
3.39094	3.31759		3.39094	5.32661	3.39094	3.99096
5.71287	2.45418		5.71287	3.847	5.71287	3.11103
8.98934	4.37573		8.98934	1.78241	8.98934	3.09761
3.81044	2.45418		3.81044	4.46401	3.81044	3.42492
0	2.26903		0	3.1127	0	0.056584
0.111031	0.163499		0.111031	5.42828	0.111031	1.35614
0.189034	0.356144		0.189034	6.63445	0.189034	0.641546
5.77109	2.926		5.77109	0.545968	5.77109	0.070389
4.42895	5.34625		4.42895	2.37574	4.42895	0.411426
2.46989	3.33771		2.46989	4.2891	2.46989	0.632268
0.879706	1.35614		0.879706	3.61706	0.879706	0.238787
3.70819	2.49057		3.70819	0.933573	3.70819	1
3.50462	3.68145		3.50462	2.96717	3.50462	2.30743
4.63343	3.32481		4.63343	0.687061	4.63343	1.47508
5.19771	4.96717		5.19771	7.23237	5.19771	3.56925
7.70016	3.1375		7.70016	6.67412	7.70016	2.28983
3.98002	3.15704		3.98002	2.0036	3.98002	2.80116
0.226509	0.226509		0.226509	2.5656	0.226509	0.321928
0.042644	0.378512		0.042644	1.31034	0.042644	3.44361
3.69933	1.07039		3.69933	5.72329	3.69933	0.731183
5.96717	4.37643		5.96717	5.08831	5.96717	3.48414
6.3127	2.87971		6.3127	4.95838	6.3127	2.38957
2.24489	3.67243		2.24489	4.06867	2.24489	0.298658
3.0036	2.83794		3.0036	7.20574	3.0036	3.09085
2.20789	3.35614		2.20789	0.659925	2.20789	3.76235
4.52419	4.33056		4.52419	8.36089	4.52419	3.93357
8.97639	2.38957		8.97639	1.76554	8.97639	3.40735
7.8327	2.9542		7.8327	4.05745	7.8327	1.77821
5.32553	1.98185		5.32553	5.81121	5.32553	4.70376
6.8212	4.60881		6.8212	5.34802	6.8212	3.99096
0.526069	2.18269		0.526069	3.22805	0.526069	0.454176
0.678072	0.070389		0.678072	3.17632	0.678072	0.163499
8.05376	2.37574		8.05376	3.54967	8.05376	4.95373
5.97407	4.50271		5.97407	1.39506	5.97407	2.9241
0.536053	0.124328		0.536053	5.54164	0.536053	0.226509
3.16671	2.22342		3.16671	5.94158	3.16671	0.250962
3.0054	1.03562		3.0054	4.89336	3.0054	1.08406
0.378512	6.3336		0.378512	4.853	0.378512	1.1177
5.13175	2.56316		5.13175	2.82985	5.13175	2.29572
1.83592	4.08746		1.83592	3.95606	1.83592	3.74739
4.17473	3.55213		4.17473	0.070389	4.17473	1.41684
4.53294	3.61117		4.53294	5.68089	4.53294	4.51979
10.5326	3.53978		10.5326	5.88313	10.5326	2.98002
5.57137	3.15381		5.57137	4.93357	5.57137	0.163499
6.21354	2.88753		6.21354	0.536053	6.21354	4.11437
5.04527	2.56316		5.04527	1.63691	5.04527	1.25701
2.12763	3.50335		2.12763	0.9855	2.12763	1.15704
6.32912	3.65076		6.32912	6.38128	6.32912	3.16027
4.19219	2.67129		4.19219	0.555816	4.19219	1.7866
5.86518	4.04089		5.86518	5.6153	5.86518	3.35332
0.505891	3.59574		0.505891	2.08746	0.505891	1.37295
0.970854	3.90785		0.970854	2.96901	0.970854	0.641546
5.75114	0.9855		5.75114	5.23688	5.75114	0.432959
1.58976	0.056584		1.58976	4.43962	1.58976	0.782409
0.604071	2.49314		0.604071	6.09972	0.604071	0.176323
0.333424	0.137504		0.333424	5.60199	0.333424	0.85599
5.31325	1.81147		5.31325	1.50589	5.31325	2.25096
0	1.51601		0	0.201634	0	0.250962
3.74953	3.28836		3.74953	5.09592	3.74953	1.56072
7.35782	3.73335		7.35782	4.75916	7.35782	5.0197
0.773996	0.286881		0.773996	7.20173	0.773996	0.632268
2.43563	4.61058		2.43563	5.42626	2.43563	2.58737
0.238787	0.111031		0.238787	7.27566	0.238787	0.641546
5.18388	2.48285		5.18388	6.03562	5.18388	0.641546
10.086	4.72083		10.086	5.8674	10.086	4.51602
3.32049	3.08576		3.32049	4.25248	3.32049	4.07724
0.918386	2.14731		0.918386	4.28021	0.918386	1.28096
9.40495	5.38094		9.40495	3.31615	9.40495	3.64386
0.298658	0.097611		0.298658	0.505891	0.298658	0.097611
10.395	5.13175		10.395	4.56803	10.395	4.43763
0.238787	0.214125		0.238787	5.02237	0.238787	0.526069
6.27352	3.22805		6.27352	4.82477	6.27352	3.80116
7.84768	3.5741		7.84768	3.34767	7.84768	3.5472
3.16993	3.35473		3.16993	2.93923	3.16993	0.575312
6.15462	1.98914		6.15462	5.34412	6.15462	2.34767
5.91241	1.51601		5.91241	5.58737	5.91241	3.51475
0.189034	0.31034		0.189034	5.53107	0.189034	0.823749
0	2.59216		0	7.0187	0	0.823749
7.84956	3.57652		7.84956	5.6091	7.84956	2.53356
3.43296	4.31034		3.43296	5.74551	3.43296	4.48993
2.43829	3.1635		2.43829	5.77637	2.43829	4.03386
1.38405	3.42761		1.38405	5.04702	1.38405	3.04089
0.895303	1.56072		0.895303	5.4121	0.895303	0.214125
1.23266	0.422233		1.23266	5.0237	1.23266	1.90689
0	1.36177		0	5.27724	0	0.367371
6.27724	4.51979		6.27724	4.34979	6.27724	3.39094
3.04963	0.887525		3.04963	3.67694	3.04963	3.14568
7.79253	4.52105		7.79253	6.80774	7.79253	4.70874
1.83188	2.41414		1.83188	0.970854	1.83188	0.070389
0	0		0	6.51175	0	0.137504
3.7866	3.90689		3.7866	4.64039	3.7866	1.64155
7.20085	3.16511		7.20085	4.29572	7.20085	2.8679
0.137504	4.39849		0.137504	5.61853	0.137504	0.238787
4.5656	3.34483		4.5656	1.0072	4.5656	2.58014
0.722466	0.704872		0.722466	5.48123	0.722466	0.956057
1.43829	0.948601		1.43829	5.46369	1.43829	0.097611
2.58014	1.9222		2.58014	3.24793	2.58014	1.33914
4.85499	1.926		4.85499	4.65363	4.85499	0.941106
3.25248	1.54102		3.25248	4.03738	3.25248	0.594549
6.27258	1.66903		6.27258	5.08449	6.27258	2.38957
0.111031	0.189034		0.111031	3.58135	0.111031	0.918386
0.014355	1.68706		0.014355	4.78083	0.014355	0.097611
9.68851	0.925999		9.68851	5.34802	9.68851	4.76075
4.24413	2.42223		4.24413	5.38267	4.24413	1.79077
11.607	5.24983		11.607	2.9279	11.607	4.29572
7.13124	4.75596		7.13124	5.71122	7.13124	1.29278
3.24336	2.02148		3.24336	5.12928	3.24336	2.75702
3.16511	4.24869		3.16511	5.64414	3.16511	5.12763
3.0072	3.89433		3.0072	7.50192	3.0072	1.39506
4.12846	2.42761		4.12846	1.64155	4.12846	4.24565
4.86641	3.0018		4.86641	4.53481	4.86641	1.12433
6.22033	3.55336		6.22033	5.10727	6.22033	1.02857
1.34483	2.49825		1.34483	4.6837	1.34483	0.887525
7.65499	3.44095		7.65499	0.85599	7.65499	3.37016
0.378512	4.41143		0.378512	0.15056	0.378512	2.75061
6.7256	2.1375		6.7256	0.594549	6.7256	2.32193
5.2407	4.41346		5.2407	5.93334	5.2407	2.59694
0.367371	0.042644		0.367371	5.99887	0.367371	1.7137
5.30232	5.07125		5.30232	3.852	5.30232	2.75702
6.82528	4.77505		6.82528	6.87406	6.82528	3.18587
8.67673	3.49569		8.67673	1.58976	8.67673	2.18587
7.28642	4.72738		7.28642	7.08799	7.28642	3.55949
4.67186	3.60881		4.67186	3.90111	4.67186	5.41109
5.79051	3.20477		5.79051	5.32625	5.79051	3.35332
3.57289	3.74953		3.57289	5.92244	3.57289	2.11103
4.14078	3.38819		4.14078	6.81237	4.14078	1.64155
8.69505	3.93734		8.69505	4.41616	8.69505	3.95513
10.3327	4.87234		10.3327	4.90545	10.3327	4.79649
1.32769	3.17313		1.32769	5.61765	1.32769	1.9486
1.41684	0.201634		1.41684	5.49249	1.41684	0.475085
4.35332	2.79494		4.35332	2.32193	4.35332	0.389567
8.30159	3.20163		8.30159	4.18507	8.30159	4.34767
0.475085	2.49314		0.475085	3.84499	0.475085	2.16993
3.73335	3.33628		3.73335	5.77347	3.73335	2.18903
2.96532	3.69488		2.96532	4.45943	2.96532	0.389567
9.04095	3.93546		9.04095	3.06867	9.04095	3.80632
7.84436	3.89336		7.84436	0.464668	7.84436	1.73552
0.124328	0.321928		0.124328	2.31325	0.124328	0.214125
2.61589	3.13258		2.61589	7.07778	2.61589	1.81557
2.79285	3.5373		2.79285	2.58256	2.79285	1.87184
7.43646	2.26003		7.43646	5.50875	7.43646	4.69877
7.31669	1.3505		7.31669	6.29921	7.31669	1.54102
6.11956	4.14078		6.11956	5.36562	6.11956	3.24945
9.44688	3.11603		9.44688	6.67044	9.44688	2.60407
3.50716	2.9982		3.50716	7.84254	3.50716	2.76765
8.75141	1.34483		8.75141	5.47638	8.75141	4.96023
8.57168	3.81967		8.57168	2.774	8.57168	3.01614
7.22535	3.39369		7.22535	6.61809	7.22535	4.42895
1.55582	1.54102		1.55582	5.7252	1.55582	3.91648
7.48655	2.51096		7.48655	1.04963	7.48655	5.2724
7.6512	2.51349		7.6512	6.22168	7.6512	0.014355
2.17313	4.12928		2.17313	4.854	2.17313	3.93829
8.12309	5.23343		8.12309	4.91552	8.12309	2.7761
0.378512	0.389567		0.378512	6.45746	0.378512	0.356144
2.45154	2.41954		2.45154	6.66619	2.45154	3.76977
1.89918	2.10769		1.89918	5.59664	1.89918	2.29278
5.53823	2.67807		5.53823	6.06889	5.53823	2.1375
0.176323	0.042644		0.176323	5.03078	0.176323	0.722466
0.137504	2.17632		0.137504	6.34678	0.137504	0.963474
0.516015	0.042644		0.516015	6.80038	0.516015	0.321928
1.53107	3.88166		1.53107	2.45418	1.53107	1.0072
2.41954	4.93121		2.41954	5.43162	2.41954	2.19535
1.66448	3.45681		1.66448	1.93734	1.66448	0.014355
8.25493	4.40463		8.25493	1.43296	8.25493	3.68145
0.15056	0.137504		0.15056	4.78188	0.15056	0.584963
5.72219	3.70819		5.72219	2.68257	5.72219	3.5373
0.321928	2.09424		0.321928	4.57652	0.321928	0.757023
4.15056	2.76553		4.15056	4.03474	4.15056	3.36036
3.91169	2.6893		3.91169	5.70901	3.91169	4.04789
7.35526	3.98459		7.35526	4.92029	7.35526	2.11103
0.948601	3.26903		0.948601	3.71918	0.948601	1.12433
0.799087	2.95233		0.799087	4.19692	0.799087	2.25701
4.91361	3.15056		4.91361	0.378512	4.91361	5.6311
3.63227	3.72901		3.63227	1.98914	3.63227	0.678072
5.05181	3.88264		5.05181	6.21548	5.05181	2.81762
1.56072	2.49569		1.56072	5.89385	1.56072	3.36457
1.57046	1.87184		1.57046	0.978196	1.57046	1.91839
4.7703	3.76765		4.7703	6.18725	4.7703	2.69377
1.25701	1		1.25701	6.83529	1.25701	0.887525
10.3625	5.12557		10.3625	0.941106	10.3625	3.49569
0.163499	1.78241		0.163499	1.64155	0.163499	2.53107
1.87578	1.54597		1.87578	3.8953	1.87578	0.485427
6.93263	5.01123		6.93263	5.71534	6.93263	4.05485
0.124328	0.214125		0.124328	6.46777	0.124328	0.275007
3.0321	3.10266		3.0321	4.22882	3.0321	2.14078
6.58842	2.82782		6.58842	3.56803	6.58842	4.04527
6.0881	2.80116		6.0881	3.8885	6.0881	3.15381
8.67525	4.22188		8.67525	1.95606	8.67525	3.78136
0.669027	4.13832		0.669027	4.57652	0.669027	3.64961
5.09929	3.43829		5.09929	6.03474	5.09929	2.41684
6.1467	4.23112		6.1467	4.87086	6.1467	3.11603
7.32885	3.91361		7.32885	5.79338	7.32885	1.91073
1.60407	4.41616		1.60407	6.86716	1.60407	3.53605
2.22651	0.956057		2.22651	4.79338	2.22651	1.73118
3.31759	3.06178		3.31759	3.70819	3.31759	1.90689
2.75061	3.7137		2.75061	2.71809	2.75061	1.85599
6.0505	4.6792		6.0505	2.85997	6.0505	3.95047
5.27538	4.17393		5.27538	4.73227	5.27538	0.163499
8.67479	5.27836		8.67479	1.18903	8.67479	4.2765
4.70763	3.51601		4.70763	2.72465	4.70763	0.214125
3.10434	3.89336		3.10434	5.72137	3.10434	2.80116
5.0365	3.56682		5.0365	2.36737	5.0365	3.26003
7.88179	3.1811		7.88179	5.43162	7.88179	2.66448
9.07254	3.46728		9.07254	3.90785	9.07254	2.84398
0.028569	0.321928		0.028569	7.11624	0.028569	0.298658
2.56316	4.17313		2.56316	5.75355	2.56316	0.250962
5.93829	4.19062		5.93829	3.15056	5.93829	1.11103
0	0.31034		0	5.40293	0	0.056584
2.45418	2.93923		2.45418	4.84699	2.45418	0.678072
4.904	4.64674		4.904	5.71946	4.904	0.713696
7.8604	4.98778		7.8604	6.35526	7.8604	4.37504
5.51885	3.06005		5.51885	4.77821	5.51885	2.86987
9.53236	3.24793		9.53236	6.32589	9.53236	2.62761
8.52888	4.49313		8.52888	5.74551	8.52888	3.6792
1.10434	1.55582		1.10434	0.516015	1.10434	1.01435
9.14568	2.24184		9.14568	4.76447	9.14568	4.67525
0.669027	0.757023		0.669027	5.1639	0.669027	0.475085
0.028569	0.189034		0.028569	1.93734	0.028569	0.070389
5.15097	3.44095		5.15097	4.54411	5.15097	0.378512
2.3505	3.21568		2.3505	5.53263	2.3505	0.389567
0.286881	0.286881		0.286881	5.31687	0.286881	0.669027
5.24565	3.39917		5.24565	3.75489	5.24565	2.40054
7.62812	3.18903		7.62812	6.41193	7.62812	4.17792
0.475085	0.226509		0.475085	3.09424	0.475085	0.014355
0.333424	0.526069		0.333424	3.54967	0.333424	0.056584
1.76554	3.68594		1.76554	3.19377	1.76554	1.926
2.41684	3.46728		2.41684	1.60881	2.41684	3.08576
6.48043	3.5435		6.48043	5.43663	6.48043	3.05832
0.097611	0.555816		0.097611	5.34625	0.097611	1.80736
0.378512	0.275007		0.378512	3.51349	0.378512	0.903038
9.48786	2.56316		9.48786	2.64386	9.48786	4.03122
0.895303	3.53605		0.895303	3.35191	0.895303	0.400538
2.6017	3.42895		2.6017	5.26228	2.6017	0.970854
7.18269	4.36107		7.18269	4.43229	7.18269	2.55336
4.12019	2.82985		4.12019	1.04264	4.12019	4.09255
10.2997	4.04264		10.2997	4.54844	10.2997	4.16912
5.70238	3.53978		5.70238	4.1643	5.70238	2.14078
3.66106	3.22651		3.66106	4.02059	3.66106	3.7845
0.344828	0.378512		0.344828	6.49362	0.344828	0.454176
0.286881	0.536053		0.286881	5.42794	0.286881	0.226509
1.05658	1.28688		1.05658	4.70763	1.05658	0.659925
3.58737	2.57531		3.58737	4.75435	3.58737	2.62293
2.5008	0.669027		2.5008	5.42928	2.5008	1.1375
8.17657	2.18269		8.17657	5.17991	8.17657	3.10936
4.54659	3.0054		4.54659	2.33914	4.54659	1.88752
5.45352	0.879706		5.45352	0.344828	5.45352	0.495695
3.61706	1.9486		3.61706	5.54071	3.61706	0.454176
2.22651	0.014355		2.22651	5.12887	2.22651	0.042644
5.1534	2.87774		5.1534	7.2317	5.1534	0.321928
6.77479	3.03562		6.77479	6.7362	6.77479	3.56925
2.23573	0.704872		2.23573	0.536053	2.23573	0.641546
8.44514	4.12267		8.44514	2.18903	8.44514	3.10098
2.45154	2.58976		2.45154	3.78555	2.45154	0.201634
2.6017	4.81044		2.6017	0.189034	2.6017	3.80219
6.75916	4.28021		6.75916	4.64846	6.75916	2.44361
0.321928	0.443607		0.321928	4.54844	0.321928	0.475085
6.96613	4.04789		6.96613	2.72683	6.96613	0.111031
3.79077	2.96347		3.79077	4.87578	3.79077	0.485427
0.111031	3.24641		0.111031	5.73769	0.111031	0.555816
5.83895	3.13093		5.83895	4.96625	5.83895	3.01078
4.58857	3.31615		4.58857	6.0036	4.58857	1.77821
4.91456	4.28318		4.91456	5.25096	4.91456	2.24793
6.05203	3.0036		6.05203	0.632268	6.05203	2.854
8.35297	2.29866		8.35297	4.64559	8.35297	3.49057
8.35103	5.23993		8.35103	4.848	8.35103	2.80323
0.367371	2.27799		0.367371	5.28983	0.367371	0.594549
9.82349	4.82528		9.82349	4.34412	9.82349	4.66846
5.75862	4.45418		5.75862	0.286881	5.75862	0.925999
4.70763	3.94579		4.70763	0.992768	4.70763	2.23266
3.8125	1.60407		3.8125	5.03562	3.8125	2.45418
0.056584	2.41684		0.056584	5.27202	0.056584	0.238787
6.90797	2.45943		6.90797	6.39421	6.90797	3.23113
3.32481	4.35826		3.32481	2.50335	3.32481	0.765535
2.30743	2.14078		2.30743	4.28021	2.30743	2.84398
0.432959	1.40599		0.432959	0.432959	0.432959	0.226509
1.65535	3.42223		1.65535	5.88947	1.65535	0.475085
4.337	4.8674		4.337	3.11103	4.337	4.79805
2.11103	0.594549		2.11103	3.85599	2.11103	0.678072
0.526069	0.070389		0.526069	5.11478	0.526069	0.526069
0.31034	2.38128		0.31034	4.61235	0.31034	3.55582
4.55643	1.7137		4.55643	5.38094	4.55643	0.214125
8.38677	2.49314		8.38677	6.1807	8.38677	3.19219
3.81352	3.65764		3.81352	4.6837	3.81352	1.98914
3.0197	0.773996		3.0197	3.91073	3.0197	0.356144
3.14241	2.9222		3.14241	3.54102	3.14241	3.488
10.953	3.49569		10.953	5.73633	10.953	4.13668
6.90087	3.26003		6.90087	5.63488	6.90087	2.848
9.62516	5.13381		9.62516	1.5656	9.62516	4.51538
0.176323	0.226509		0.176323	5.1334	0.176323	0.678072
0.056584	0.028569		0.056584	3.24489	0.056584	0.176323
9.95091	4.1102		9.95091	4.81044	9.95091	3.98368
4.76288	1.75702		4.76288	4.95931	4.76288	3.73335
5.35896	4.337		5.35896	2.53356	5.35896	0.124328
4.80632	3.58976		4.80632	5.01436	4.80632	3.11103
3.12267	1.68706		3.12267	0.238787	3.12267	0.189034
8.04379	3.41684		8.04379	4.83744	8.04379	2.03914
4.13258	3.24641		4.13258	3.66221	4.13258	0.15056
0.367371	0.097611		0.367371	4.63981	0.367371	0.823749
0.056584	2.67807		0.056584	5.98368	0.056584	3.9222
1.26903	1.62761		1.26903	6.43646	1.26903	0.948601
2.99639	1.02857		2.99639	2.23573	2.99639	1.0635
2.47768	3.98914		2.47768	5.7366	2.47768	1.91457
7.07991	3.76871		7.07991	5.46891	7.07991	4.16832
5.13258	4.77558		5.13258	3.08236	5.13258	2.13422
7.39951	3.98368		7.39951	0.485427	7.39951	4.29057
7.25238	3.41007		7.25238	5.2709	7.25238	4.0009
0.189034	0.070389		0.189034	4.50208	0.189034	0.632268
5.20828	1.70044		5.20828	5.81532	5.20828	4.46009
4.30086	3.08066		4.30086	3.34199	4.30086	3.91073
2.93923	4.13668		2.93923	5.53854	2.93923	2.08746
0.807355	2.28392		0.807355	1.16993	0.807355	0.137504
0.695994	0.495695		0.695994	5.4019	0.695994	0.250962
0.555816	0.632268		0.555816	0.831877	0.555816	0.15056
8.07858	3.72901		8.07858	4.35755	8.07858	1.41684
8.12236	3.4489		8.12236	2.14078	8.12236	3.78973
5.45549	3.72901		5.45549	4.83643	5.45549	2.35332
4.65821	3.65535		4.65821	3.9542	4.65821	2.05311
5.90713	3.81865		5.90713	6.76766	5.90713	3.03562
0.238787	1.4489		0.238787	4.74201	0.238787	0.201634
6.76062	4.2211		6.76062	0.887525	6.76062	3.83491
6.36457	3.62761		6.36457	2.28096	6.36457	4.06091
8.35676	2.55827		8.35676	5.75221	8.35676	4.33628
10.7701	4.21878		10.7701	7.20721	10.7701	4.12846
3.91265	2.92029		3.91265	2.17632	3.91265	3.05658
3.34341	0.400538		3.34341	5.05311	3.34341	1.42761
8.44588	5.46467		8.44588	4.98823	8.44588	2.36457
6.80452	3.90785		6.80452	5.28244	6.80452	1.48543
6.1819	2.95047		6.1819	0.782409	6.1819	3.22651
0	0.214125		0	5.61677	0	1.9222
3.13093	3.80426		3.13093	0.722466	3.13093	4.0036
6.04505	3.08746		6.04505	3.68818	6.04505	3.36457
0.443607	0.070389		0.443607	3.84298	0.443607	1.1177
5.47671	3.42761		5.47671	3.42895	5.47671	4.32337
5.76421	3.63227		5.76421	4.49953	5.76421	0.31034
1.61824	2.96162		1.61824	5.84072	1.61824	0.863938
0.464668	2.96901		0.464668	0.992768	0.464668	0.056584
5.25777	3.60644		5.25777	4.6094	5.25777	1.61353
4.75649	2.30743		4.75649	1.17632	4.75649	1.79077
0.815575	0.9855		0.815575	0.137504	0.815575	0.799087
6.17772	3.36877		6.17772	3.58857	6.17772	3.17632
4.64616	1.69599		4.64616	2.5656	4.64616	1.02857
1.852	3.90304		1.852	4.65076	1.852	0.918386
7.76805	3.49697		7.76805	3.72901	7.76805	3.30159
3.21101	3.5656		3.21101	2.50589	3.21101	1.29866
0.378512	2.40599		0.378512	5.24298	0.378512	0.250962
6.28281	3.7761		6.28281	0.903038	6.28281	2.83592
5.66647	4.14323		5.66647	5.94509	5.66647	1.56072
2.58737	3.47508		2.58737	5.85	2.58737	3.23726
0	0.85599		0	5.75114	0	0.056584
6.21043	2.59455		6.21043	5.9991	6.21043	2.64155
3.92315	2.02857		3.92315	3.70708	3.92315	3.06523
7.61471	4.76447		7.61471	4.93499	7.61471	2.9279
5.4614	2.22342		5.4614	2.91265	5.4614	1.42761
1.44361	2.54844		1.44361	1.17632	1.44361	1.63227
0.604071	2.11437		0.604071	4.337	0.604071	0.555816
1.20789	2.07724		1.20789	5.85947	1.20789	0.070389
0.201634	0.028569		0.201634	7.28633	0.201634	0.226509
3.53107	2.34199		3.53107	0.505891	3.53107	2.16993
1.12433	5.14037		1.12433	5.73335	1.12433	0.863938
3.31759	3.29131		3.31759	2.79077	3.31759	0.748461
0.189034	0.31034		0.189034	5.26566	0.189034	0.594549
9.93939	4.78921		9.93939	5.26866	9.93939	3.91934
7.70363	4.83137		7.70363	5.29939	7.70363	4.58616
1.65993	1.63227		1.65993	0.85599	1.65993	0.070389
1.58496	2.25399		1.58496	6.66832	1.58496	2.26604
7.08502	4.43095		7.08502	4.5741	7.08502	2.70266
7.47573	4.0018		7.47573	4.29719	7.47573	3.48671
3.08406	3.904		3.08406	4.54164	3.08406	0.443607
2.02503	2.29278		2.02503	6.74133	2.02503	0.286881
2.50589	3.40871		2.50589	4.75969	2.50589	2.28392
6.76646	4.3147		6.76646	6.02015	6.76646	4.9542
0	0		0	6.84122	0	0.124328
7.96064	2.5435		7.96064	3.61235	7.96064	3.75275
0.378512	0.097611		0.378512	5.01569	0.378512	0.782409
3.79701	3.09424		3.79701	6.59485	3.79701	1.58496
0.275007	2.04963		0.275007	1.19535	0.275007	3.29278
0.321928	0.298658		0.321928	3.61589	0.321928	0.687061
1.45418	5.49793		1.45418	2.75916	1.45418	4.56316
5.21413	4.19928		5.21413	0.432959	5.21413	1.01435
0.411426	0.028569		0.411426	5.78477	0.411426	0.097611
2.68706	0.871844		2.68706	5.56499	2.68706	0.85599
0.298658	1.08406		0.298658	4.76341	0.298658	0.275007
0.321928	3.26903		0.321928	4.81044	0.321928	0.485427
1.11103	2.02503		1.11103	1.21412	1.11103	1.68706
0.070389	0.042644		0.070389	3.42358	0.070389	0.263034
2.07039	2.18269		2.07039	5.14568	2.07039	0.464668
7.06512	4.85499		7.06512	1.43829	7.06512	4.17712
0.704872	0.263034		0.704872	4.06178	0.704872	0.298658
3.33628	3.55459		3.33628	3.54597	3.33628	1.38957
0	0		0	2.29278	0	0.389567
6.37695	2.81557		6.37695	4.89142	6.37695	2.55827
6.9305	2.75275		6.9305	0.831877	6.9305	2.22342
6.54643	4.15137		6.54643	1.15056	6.54643	3.29278
2.28096	3.11437		2.28096	5.16912	2.28096	0.641546
0.31034	0.464668		0.31034	4.81609	0.31034	2.33056
6.83086	2.82985		6.83086	3.53232	6.83086	3.52482
8.10622	3.1375		8.10622	5.23573	8.10622	1.40054
0.070389	0.263034		0.070389	3.48929	0.070389	0.933573
4.77558	2.62994		4.77558	5.13134	4.77558	1.25096
6.15097	4.16028		6.15097	4.51791	6.15097	1.71809
1.14405	2.10434		1.14405	4.4019	1.14405	1.78241
0.238787	0.411426		0.238787	6.34341	0.238787	0.333424
0.773996	4.06953		0.773996	5.08364	0.773996	2.97453
0.650765	3.23266		0.650765	4.89869	0.650765	0.238787
1.83996	1.49057		1.83996	2.9782	1.83996	1.22651
5.12805	2.9855		5.12805	3.02325	5.12805	1.46989
4.08321	2.57046		4.08321	3.89045	4.08321	0.344828
0.31034	2.32193		0.31034	5.04177	0.31034	0.505891
6.32121	3.45154		6.32121	4.749	6.32121	0.731183
7.04941	1.3505		7.04941	4.8679	7.04941	4.68482
2.84197	1.72247		2.84197	6.26866	2.84197	0.505891
3.22651	1.848		3.22651	4.44162	3.22651	1.98185
5.63663	2.4489		5.63663	0.367371	5.63663	4.37712
10.9111	3.90304		10.9111	3.39369	10.9111	3.91552
3.90977	1.30451		3.90977	5.60288	3.90977	4.68032
4.06695	3.11437		4.06695	4.22651	4.06695	2.81762
2.38405	1.43829		2.38405	5.36352	2.38405	0.214125
2.06005	2.89336		2.06005	2.12763	2.06005	0.575312
4.58195	3.60644		4.58195	1.37295	4.58195	2.16671
0.526069	3.2342		0.526069	2.20789	0.526069	1.0635
3.0993	3.06178		3.0993	3.11437	3.0993	0.201634
0.847997	2.41684		0.847997	0.925999	0.847997	0.275007
0.704872	0.823749		0.704872	6.26697	0.704872	0.176323
3.851	3.67356		3.851	3.64155	3.851	0.773996
4.29425	2.71809		4.29425	4.64212	4.29425	0.298658
6.88032	3.40735		6.88032	2.24793	6.88032	0.545968
4.71809	2.6017		4.71809	6.29921	4.71809	0.263034
0.176323	2.14731		0.176323	4.63865	0.176323	0.124328
6.3792	4.95327		6.3792	3.44228	6.3792	4.22651
2.78869	2.36457		2.78869	4.13668	2.78869	0.189034
1.38405	0.111031		1.38405	5.57773	1.38405	0.765535
5.86419	3.34199		5.86419	5.32769	5.86419	3.43162
8.37942	3.74093		8.37942	1.45943	8.37942	2.47768
3.28244	3.62761		3.28244	4.30086	3.28244	1.07724
0.485427	1.04963		0.485427	5.96878	0.485427	0.356144
2.38957	0.321928		2.38957	5.99367	2.38957	0.226509
0.669027	2.72683		0.669027	4.69209	0.669027	1.13093
8.28452	2.16993		8.28452	3.82171	8.28452	3.24945
3.64731	2.9222		3.64731	0.189034	3.64731	2.85
1.02148	1.57531		1.02148	5.7271	1.02148	1.73118
7.33298	3.98002		7.33298	0.863938	7.33298	3.75168
3.14731	2.54597		3.14731	3.55336	3.14731	4.48736
4.30451	1.65993		4.30451	1.20789	4.30451	0.594549
7.45549	4.45746		7.45549	2.42492	7.45549	3.73444
5.72874	0.941106		5.72874	1.93357	5.72874	3.56316
3.41143	3.80529		3.41143	5.43496	3.41143	1.95606
0.344828	2.69822		0.344828	4.03914	0.344828	1.85997
7.25993	2.84398		7.25993	1.56072	7.25993	3.58496
8.82318	4.05918		8.82318	4.45615	8.82318	3.32337
0	0.344828		0	0.526069	0	0.575312
0.895303	0.83996		0.895303	4.65191	0.895303	0.333424
6.73674	3.30012		6.73674	4.87824	6.73674	1.87184
5.31107	4.37016		5.31107	5.22535	5.31107	3.84298
5.98276	3.10936		5.98276	0.632268	5.98276	4.32121
7.68433	4.40803		7.68433	6.19476	7.68433	4.42559
2.25399	1.5509		2.25399	0.632268	2.25399	3.33199
0	0.124328		0	5.03122	0	0.042644
2.43829	1.79909		2.43829	6.4116	2.43829	3.35614
6.44626	3.9364		6.44626	2.17632	6.44626	4.23955
1.38957	0.505891		1.38957	1.91839	1.38957	0.226509
1.09085	3.79909		1.09085	5.25512	1.09085	4.13914
0.176323	0.056584		0.176323	4.9607	0.176323	0.933573
0.201634	0.475085		0.201634	4.72738	0.201634	0.687061
3.46074	3.69822		3.46074	5.69794	3.46074	3.60288
3.16671	2.83188		3.16671	5.46924	3.16671	3.51853
0.823749	0.526069		0.823749	4.33985	0.823749	0.584963
8.45092	4.70044		8.45092	6.28021	8.45092	2.8339
3.98914	2.65306		3.98914	6.3386	3.98914	0.333424
3.87184	1.33342		3.87184	5.85125	3.87184	1.13093
0.321928	0.097611		0.321928	0.137504	0.321928	0.263034
2.9542	4.68032		2.9542	5.23534	2.9542	1.42761
1.40599	1.83996		1.40599	6.23726	1.40599	0.226509
5.69544	2.05311		5.69544	2.43563	5.69544	3.38405
3.47638	1.79494		3.47638	2.47508	3.47638	2.48027
4.71039	4.15866		4.71039	4.34056	4.71039	2.53356
8.59425	3.29866		8.59425	2.17632	8.59425	3.64846
0.124328	0.15056		0.124328	4.34696	0.124328	0.31034
2.87381	2.44095		2.87381	5.51853	2.87381	0.250962
7.6471	4.61589		7.6471	3.13586	7.6471	2.17951
0.879706	1.83996		0.879706	5.29903	0.879706	2.6893
8.81766	3.83996		8.81766	4.68257	8.81766	1.31034
8.24413	4.36457		8.24413	6.33878	8.24413	2.72247
0	2.58496		0	4.77083	0	0.189034
3.11603	3.93923		3.11603	2.68257	3.11603	0.422233
0.422233	0.400538		0.422233	3.27352	0.422233	0.757023
1.81557	2.17632		1.81557	1.62293	1.81557	3.52732
0.286881	1.65535		0.286881	5.7811	0.286881	0.163499
0.31034	0.042644		0.31034	5.64357	0.31034	0.286881
1.31615	0.333424		1.31615	6.30943	1.31615	0.584963
8.61497	5.02945		8.61497	2.5656	8.61497	3.25248
1.48543	1.60881		1.48543	0.594549	1.48543	3.10936
1.22651	2.10434		1.22651	5.52638	1.22651	0.516015
3.99458	1.54102		3.99458	0.189034	3.99458	1.09085
2.19849	0.15056		2.19849	0.790772	2.19849	0.124328
10.1558	4.23189		10.1558	3.40054	10.1558	3.55213
8.19677	4.36036		8.19677	5.2292	8.19677	3.6311
6.32301	1.95233		6.32301	2.64846	6.32301	3.43696
0.124328	0.505891		0.124328	3.99005	0.124328	0.286881
2.99458	2.79285		2.99458	0.687061	2.99458	2.42492
2.0072	1.97453		2.0072	5.75676	2.0072	0.321928
1.5509	3.29572		1.5509	5.91409	1.5509	2.58256
4.67242	3.0018		4.67242	4.28836	4.67242	3.63459
0.31034	0.070389		0.31034		0.31034	0.887525
1.07039	0.505891		1.07039		1.07039	0.526069
9.92751	4.8748		9.92751		9.92751	4.27947
5.94486	2.93168		5.94486		5.94486	2.38957
2.07382	2.27799		2.07382		2.07382	1.49569
5.22304	2.36457		5.22304		5.22304	2.06005
5.20672	3.849		5.20672		5.20672	4.01525
6.06652	4.45088		6.06652		6.06652	3.21568
6.10518	3.80012		6.10518		6.10518	4.0917
5.35156	4.08491		5.35156		5.35156	3.17473
4.63227	3.35755		4.63227		4.63227	2.04264
0	1.02148		0		0	0.31034
2.10098	0.275007		2.10098		2.10098	2.45418
4.35755	4.80529		4.35755		4.35755	2.7761
1.20789	2.83188		1.20789		1.20789	2.31904
8.83213	2.59932		8.83213		8.83213	1.14405
4.0054	2.7115		4.0054		4.0054	4.27426
5.5373	3.10769		5.5373		5.5373	1.63691
5.24565	2.27202		5.24565		5.24565	2.15381
7.50152	2.50589		7.50152		7.50152	3.47638
0.163499	1.13093		0.163499		0.163499	1.70487
4.17951	4.57168		4.17951		4.17951	3.43029
2.80735	0.298658		2.80735		2.80735	1.30451
5.14731	4.42021		5.14731		5.14731	0.485427
5.18468	1.83592		5.18468		5.18468	3.83086
2.75489	1.66903		2.75489		2.75489	0.695994
0.176323	2.61117		0.176323		0.176323	0.545968
0.575312	0.056584		0.575312		0.575312	0.641546
7.96324	2.7761		7.96324		7.96324	3.66676
9.25231	3.16671		9.25231		9.25231	3.07211
6.91133	3.96532		6.91133		6.91133	3.27352
3.28244	1		3.28244		3.28244	3.15704
0.163499	0.378512		0.163499		0.163499	0.650765
3.8885	3.24031		3.8885		3.8885	2.02857
0.201634	0.238787		0.201634		0.201634	0.807355
1.05658	0.056584		1.05658		1.05658	1.62293
6.47103	1.5509		6.47103		6.47103	2.09761
5.08704	3.64961		5.08704		5.08704	4.70487
0	1.76977		0		0	4.06005
7.46638	4.42089		7.46638		7.46638	2.43029
0.757023	0.443607		0.757023		0.757023	0.903038
7.85922	3.06005		7.85922		7.85922	1.68706
4.84298	3.1127		4.84298		4.84298	1.95233
1.78241	2.97085		1.78241		1.78241	2.94111

## Sheet: Figure 7B
Brain Cancer P value= 0.0124			Thyroid Cancer P value= 0.009
CCN2 log2(TPM+1) Expression 22Q1 Public	PNRC1 log2(TPM+1) Expression 22Q1 Public		CCN2 log2(TPM+1) Expression 22Q1 Public	PNRC1 log2(TPM+1) Expression 22Q1 Public
3.56194	4.61471		1.90304	5.60822
5.11894	3.40735		8.33315	3.3978
8.65582	2.43296		8.31488	3.27501
1.89918	5.36142		7.64933	3.69153
6.01033	1.87578		4.42223	3.68594
5.05572	2.96162		5.87529	5.26454
8.27235	3.70155		3.95791	6.75916
8.19913	5.89045		6.64746	3.6311
6.07275	4.63865		8.76557	3.66335
6.22901	3.42223		8.98934	4.74685
3.6017	7.04297		8.30159	4.42358
0.970854	3.7301		4.70763	6.22689
0.62293	5.45582		5.83895	5.95768
8.77017	3.09424		6.90087	5.56194
8.50096	4.87283		7.25238	3.25096
4.85898	6.05355		5.45549	5.23688
7.10811	3.07895		5.94486	5.6907
7.50494	3.37851
6.58346	3.95884
7.66541	4.10434
5.59723	3.09085
9.6243	3.86295
7.55643	4.49761
5.77294	4.82883
6.82299	5.30998
6.47411	5.16028
5.0387	5.24222
7.08449	4.97269
6.16892	3.854
5.85599	4.40803
9.11025	4.23879
6.45845	3.07039
4.98368	3.53356
3.65076	4.24108
0.536053	4.26604
4.87036	5.6659
7.12794	4.91169
7.75034	3.59932
8.488	4.9514
4.76977	3.59335
6.89494	5.15421
6.23208	4.82477
10.2169	4.95233
3.75275	6.21062
7.0421	4.854
4.07981	3.50716
6.4822	3.13093
7.70016	2.53854
6.21354	3.80012
5.86518	3.15381
9.40495	5.15543
6.15462	3.63227
4.85499	5.41718
4.24413	4.76447
7.13124	5.25814
8.67673	3.72574
9.04095	3.37851
7.31669	3.34341
10.3625	3.48543
2.45418	6.51396
5.51885	4.36387
9.53236	5.81992
0.097611	4.5735
9.48786	3.7126
10.2997	4.30159
8.38677	4.12101
8.07858	3.42223
8.12236	2.22651
3.34341	3.51223
6.80452	3.35332
6.1819	4.52419
0.378512	4.99322
9.93939	3.56682
6.83086	3.68482
0.847997	4.37156
3.28244	4.25172
7.25993	3.32912
7.68433	4.18903
3.47638	5.01792
8.24413	4.79181
5.5373	4.92979
9.25231	3.22805
6.47103	4.27426

## Sheet: Figure 7C
P value=4.92E-7			P value=9.83E-6			P value=1.83E-11
DDX6 Gene Effect (Chronos) CRISPR (DepMap 22Q1 Public+Score	DDX6 Gene Effect (Chronos) CRISPR (DepMap 22Q1 Public+Score		LSM14A Gene Effect (Chronos) CRISPR (DepMap 22Q1 Public+Score	LSM14A Gene Effect (Chronos) CRISPR (DepMap 22Q1 Public+Score		EDC4 Gene Effect (Chronos) CRISPR (DepMap 22Q1 Public+Score
-0.9116	-0.16512		-0.7555	-0.16512		-0.28978	-0.16512
-0.69149	-0.02824		-0.28197	-0.02824		-0.49413	-0.02824
-0.53146	-0.24819		-0.35297	-0.24819		-0.56274	-0.24819
-0.52416	-0.70816		-0.41935	-0.70816		-0.24892	-0.70816
-1.07977	-0.84266		-0.36388	-0.84266		-0.25418	-0.84266
-1.11136	-0.08902		-0.38978	-0.08902		-0.08571	-0.08902
-0.83576	0.090724		-0.64236	0.090724		-0.54608	0.090724
-0.76863	-0.18298		-0.37541	-0.18298		-0.29138	-0.18298
-0.7774	-0.00777		-0.02308	-0.00777		-0.10488	-0.00777
-0.82599	-0.40146		-0.44478	-0.40146		-0.2155	-0.40146
-0.97436	-0.94927		-0.25771	-0.94927		-0.33271	-0.94927
-0.60005	-0.33542		-0.38098	-0.33542		-0.50054	-0.33542
-0.63643	-0.2139		-0.53984	-0.2139		-0.04337	-0.2139
-1.45701	-1.59238		-0.33033	-1.59238		-0.57513	-1.59238
-0.57752	-0.43055		-0.42055	-0.43055		-0.15163	-0.43055
-0.87145	-0.41394		-0.31076	-0.41394		-0.32173	-0.41394
-1.341	-0.07646		-0.38286	-0.07646		-0.14035	-0.07646
-0.54429	-0.22205		-0.4418	-0.22205		-0.26555	-0.22205
-1.02887	-0.13844		-0.47166	-0.13844		-0.17761	-0.13844
-0.6388	-0.31223		-0.45932	-0.31223		-0.33474	-0.31223
-0.77969	-0.26729		-0.53551	-0.26729		-0.1839	-0.26729
-0.68746	-0.28069		-0.4401	-0.28069		-0.3404	-0.28069
-1.30084	-0.09186		-0.53919	-0.09186		-0.19406	-0.09186
-0.80283	-0.24527		-0.2522	-0.24527		-0.48833	-0.24527
-0.89636	0.003757		-0.57998	0.003757		-0.65863	0.003757
-0.82305	-0.38941		-0.42567	-0.38941		-0.37256	-0.38941
-0.85388	-0.14612		-0.27103	-0.14612		-0.32002	-0.14612
-0.80018	-0.25525		-0.44527	-0.25525		-0.39641	-0.25525
-0.77061	-0.16719		-0.21677	-0.16719		0.00342	-0.16719
-0.80276	-0.0762		-0.34213	-0.0762		-0.19329	-0.0762
-0.75221	-0.09106		-0.21267	-0.09106		-0.16346	-0.09106
-0.68758	-0.3031		-0.59038	-0.3031		-1.11239	-0.3031
-0.62147	-0.14803		-0.45981	-0.14803		-0.33695	-0.14803
-0.46224	-0.1874		-0.3429	-0.1874		-0.18413	-0.1874
-0.78067	0.159415		-0.12915	0.159415		-0.78359	0.159415
-0.98217	-0.39306		-0.43746	-0.39306		-0.421	-0.39306
-0.81295	-0.51288		-0.46602	-0.51288		-0.39028	-0.51288
-0.76988	-0.05457		-0.54604	-0.05457		-0.38615	-0.05457
-1.39105	-0.26695		-0.4396	-0.26695		-0.82021	-0.26695
-0.92786	-0.32863		-0.61977	-0.32863		-0.47607	-0.32863
-0.60768	-0.16077		0.000151	-0.16077		-0.49469	-0.16077
-0.24703	-0.38452		-0.51323	-0.38452		-0.22439	-0.38452
-1.19528	-0.10712		-0.25314	-0.10712		-0.39795	-0.10712
-1.35229	-0.35722		-0.37208	-0.35722		-0.53717	-0.35722
-1.15802	-0.38888		-0.7411	-0.38888		-0.68762	-0.38888
-0.65076	-0.63654		-0.54665	-0.63654		-0.2965	-0.63654
-0.99179	-0.24393		-0.43512	-0.24393		-0.42577	-0.24393
-1.61406	-0.4488		-0.75733	-0.4488		-0.45986	-0.4488
-0.56538	-0.15534		-0.03528	-0.15534		-0.52774	-0.15534
-1.1374	-0.25454		-0.45746	-0.25454		-0.61448	-0.25454
-0.98373	-0.09468		-0.49803	-0.09468		-0.1171	-0.09468
-0.74093	-0.82636		-0.52225	-0.82636		-0.68274	-0.82636
-0.21947	-0.62889		-0.52735	-0.62889		-0.09154	-0.62889
-0.73552	-0.39274		-0.39312	-0.39274		-0.40283	-0.39274
-0.4943	-0.0477		-0.22151	-0.0477		-0.31946	-0.0477
-1.13217	0.011111		-0.28588	0.011111		-0.39569	0.011111
-1.54483	-0.93143		-0.64963	-0.93143		-0.4387	-0.93143
-1.10164	-0.28056		-0.55291	-0.28056		-0.37549	-0.28056
-1.33801	-0.21911		-0.40972	-0.21911		-0.48745	-0.21911
-0.7975	-0.11594		-0.23389	-0.11594		0.008139	-0.11594
-1.353	-0.34953		-0.51059	-0.34953		-0.5294	-0.34953
-0.76363	-0.19197		-0.65079	-0.19197		0.012142	-0.19197
-1.11581	-0.93552		-0.31576	-0.93552		-0.48124	-0.93552
-0.76917	-0.08172		-0.44843	-0.08172		-0.32286	-0.08172
-0.92303	-0.12781		-0.68213	-0.12781		-0.36345	-0.12781
-0.84068	-0.06687		-0.54961	-0.06687		-0.14548	-0.06687
-0.89582	-0.1541		-0.47092	-0.1541		-0.40156	-0.1541
-0.95873	-0.26415		-0.30777	-0.26415		-0.4011	-0.26415
-1.13809	-0.19213		-0.2549	-0.19213		-0.76294	-0.19213
-1.15912	-1.23391		-0.35855	-1.23391		-0.55107	-1.23391
-0.97452	-0.33272		-0.59509	-0.33272		-0.74827	-0.33272
-0.61032	-0.24836		-0.45059	-0.24836		-0.27658	-0.24836
-1.05995	-0.0264		-0.58665	-0.0264		-0.15125	-0.0264
-0.50925	-0.27537		-0.46147	-0.27537		-0.39216	-0.27537
-1.6294	-0.78683		-0.60347	-0.78683		-0.70994	-0.78683
-0.50415	-0.42377		-0.2944	-0.42377		-0.3757	-0.42377
-0.97248	-0.03389		-0.20796	-0.03389		-0.55421	-0.03389
-1.3853	-1.24822		-0.43322	-1.24822		-0.61111	-1.24822
-0.82903	-0.14643		-0.42997	-0.14643		-0.37495	-0.14643
-0.72845	-0.56799		-0.25316	-0.56799		-0.16146	-0.56799
-0.88846	-0.24081		-0.38438	-0.24081		-0.27309	-0.24081
-0.5884	0.126008		-0.48646	0.126008		-0.69334	0.126008
-1.19504	-0.34502		-0.35073	-0.34502		-0.46739	-0.34502
-0.18747	-0.01362		-0.54703	-0.01362		0.220874	-0.01362
-0.87902	-0.70511		-0.63269	-0.70511		-0.29043	-0.70511
-0.91763	-1.20726		-0.41261	-1.20726		-0.79236	-1.20726
-1.08127	-0.24296		-0.34895	-0.24296		-0.67961	-0.24296
-1.45983	-0.17094		-0.28171	-0.17094		-0.27282	-0.17094
-0.41315	-1.08085		-0.5901	-1.08085		-0.29251	-1.08085
-0.39593	-0.22399		-0.61695	-0.22399		-0.21671	-0.22399
-1.01162	-0.26779		-0.33055	-0.26779		-0.11621	-0.26779
-0.53696	-0.13961		-0.46992	-0.13961		-0.29208	-0.13961
-1.16464	-0.13184		-0.39322	-0.13184		-0.20249	-0.13184
-0.53362	-0.16214		-0.04459	-0.16214		-0.26072	-0.16214
-0.71978	-0.21419		-0.53618	-0.21419		-0.2048	-0.21419
-0.36017	-0.24777		-0.55023	-0.24777		-0.69559	-0.24777
-1.25883	-0.4709		-0.90657	-0.4709		-0.92461	-0.4709
-0.8895	-1.41271		-0.62689	-1.41271		-0.24692	-1.41271
-0.78741	-0.30031		-0.37798	-0.30031		-0.48965	-0.30031
-0.63001	-0.56292		-0.66995	-0.56292		-0.33729	-0.56292
-0.98701	-0.15697		-0.25601	-0.15697		-0.12879	-0.15697
-1.2341	-0.08467		-0.36295	-0.08467		-0.3155	-0.08467
-1.29102	-0.22179		-0.37943	-0.22179		-0.31627	-0.22179
-0.77929	-0.58669		-0.37641	-0.58669		-0.22336	-0.58669
-0.95766	-0.33605		-0.5552	-0.33605		-0.54467	-0.33605
-0.82764	-0.1111		-0.29918	-0.1111		-0.0511	-0.1111
-1.07049	-0.1164		-0.23976	-0.1164		-0.44093	-0.1164
-0.65092	-0.12979		-0.5453	-0.12979		-0.36017	-0.12979
-1.0437	-0.17861		-0.16117	-0.17861		-0.40567	-0.17861
-1.23462	-0.0807		-0.46522	-0.0807		-0.24804	-0.0807
-0.83723	-0.21032		-0.51461	-0.21032		-0.32	-0.21032
-0.85553	-0.19845		-0.94928	-0.19845		-0.45761	-0.19845
-0.96363	-0.095		-0.45233	-0.095		-0.16586	-0.095
-0.72006	-0.02688		-0.11886	-0.02688		-0.26836	-0.02688
-0.64582	-0.60971		-0.50962	-0.60971		-0.76687	-0.60971
-1.25751	-0.28038		-0.42435	-0.28038		-0.44193	-0.28038
-1.30653	-0.17938		-0.49235	-0.17938		-0.76174	-0.17938
-0.72228	-0.65093		-0.32449	-0.65093		-0.14529	-0.65093
-0.54252	-1.16743		-0.67034	-1.16743		-0.34827	-1.16743
-0.76702	-0.32131		-0.25761	-0.32131		-0.20419	-0.32131
-0.68799	-0.54887		-0.44318	-0.54887		-0.32395	-0.54887
-0.81836	-0.5585		-0.48921	-0.5585		-0.35696	-0.5585
-0.96065	-0.08582		-0.38478	-0.08582		-0.24976	-0.08582
-0.50979	-0.13081		-0.25198	-0.13081		-0.38532	-0.13081
-1.02674	-0.53272		-0.66759	-0.53272		-0.53876	-0.53272
-1.21712	-0.34739		-0.26419	-0.34739		-0.23357	-0.34739
-0.9081	-0.10925		-0.37234	-0.10925		-0.20837	-0.10925
-0.51909	-0.25794		-0.22988	-0.25794		-0.40569	-0.25794
-0.85902	-1.16118		-0.2361	-1.16118		-0.27281	-1.16118
-0.95501	-0.31317		-0.35772	-0.31317		-0.47001	-0.31317
-1.0674	-0.1208		-0.25511	-0.1208		-0.21338	-0.1208
-1.1149	-0.3591		-0.27473	-0.3591		-0.22103	-0.3591
-0.70472	-0.12694		-0.45731	-0.12694		-0.24165	-0.12694
-1.27718	-0.74121		-0.46556	-0.74121		-0.55014	-0.74121
-1.04827	-0.25235		-0.46887	-0.25235		-0.81358	-0.25235
-1.10875	-0.1373		-0.21037	-0.1373		-0.36263	-0.1373
-1.06654	-0.06618		-0.44406	-0.06618		-0.49692	-0.06618
-1.2106	-0.50458		-0.42229	-0.50458		-0.65362	-0.50458
-1.15516	-0.27182		-0.56582	-0.27182		-0.27417	-0.27182
-1.37623	-0.51378		-0.56988	-0.51378		-0.9543	-0.51378
-0.90122	-0.51224		-0.25106	-0.51224		-0.3693	-0.51224
-0.65055	-0.87961		-0.45542	-0.87961		-0.7422	-0.87961
-1.13982	-0.09951		-0.32807	-0.09951		-0.39787	-0.09951
-0.73853	-0.22881		-0.46037	-0.22881		-0.31363	-0.22881
-0.65729	-0.86709		-0.60126	-0.86709		-0.3118	-0.86709
-0.93814	-0.22088		-0.26057	-0.22088		-0.2293	-0.22088
-0.96517	-0.57585		-0.52094	-0.57585		-0.22612	-0.57585
-0.44323	-0.78058		-0.46072	-0.78058		-0.25529	-0.78058
-1.0605	0.00079		-0.1223	0.00079		-0.25296	0.00079
-1.03204	-0.11953		-0.1367	-0.11953		-0.54216	-0.11953
-0.5026	-0.08622		-0.48654	-0.08622		0.051337	-0.08622
-0.83394	-0.23687		-0.44395	-0.23687		-0.34148	-0.23687
-1.1256	-0.95919		-0.58662	-0.95919		-0.34309	-0.95919
-0.88312	-0.22839		-0.40347	-0.22839		-0.48659	-0.22839
-1.00504	-0.17299		-0.38415	-0.17299		-0.2958	-0.17299
-0.87811	-0.19287		-0.2634	-0.19287		-0.54896	-0.19287
-0.75492	-0.07613		-0.43084	-0.07613		-0.12099	-0.07613
-1.32611	-0.7553		-0.46423	-0.7553		-0.44112	-0.7553
-0.79605	-1.04756		-0.41608	-1.04756		-0.24025	-1.04756
-0.92246	-0.09672		-0.32615	-0.09672		-0.01781	-0.09672
-0.87951	-0.24051		-0.33625	-0.24051		-0.33006	-0.24051
-0.75661	-0.38406		-0.35244	-0.38406		-0.2966	-0.38406
-1.33863	-0.23784		-0.44886	-0.23784		-0.52471	-0.23784
-1.02029	-0.08898		-0.3334	-0.08898		-0.20824	-0.08898
-0.5227	-0.28167		-0.64716	-0.28167		-0.28554	-0.28167
-0.55777	-0.16534		-0.45853	-0.16534		-0.25761	-0.16534
-0.83614	-0.25132		-0.35048	-0.25132		-0.35726	-0.25132
-0.77487	-0.46531		-0.19268	-0.46531		-0.46828	-0.46531
-1.41278	-0.61003		-0.24839	-0.61003		-0.81804	-0.61003
-1.4968	-0.31681		-0.12352	-0.31681		-0.66093	-0.31681
-0.46564	-0.45893		-0.17943	-0.45893		-0.07863	-0.45893
-0.77813	-0.35265		-0.13029	-0.35265		-0.40101	-0.35265
-1.41215	-0.11885		-0.32162	-0.11885		-0.63447	-0.11885
-0.87869	-0.7293		-0.47661	-0.7293		-0.13766	-0.7293
-0.82111	-0.7795		-0.47694	-0.7795		-0.14315	-0.7795
-0.87118	-0.29983		-0.52017	-0.29983		-0.48046	-0.29983
-0.74462	-0.21857		-0.28848	-0.21857		-0.44882	-0.21857
-1.08297	-0.23785		-0.48684	-0.23785		-0.56917	-0.23785
-0.70922	-0.47814		-0.1884	-0.47814		-0.11216	-0.47814
-0.97935	-0.40195		-0.37792	-0.40195		-0.43926	-0.40195
-0.58667	0.068611		-0.17761	0.068611		-0.59122	0.068611
-0.78829	-0.37035		-0.53371	-0.37035		-0.12176	-0.37035
-0.63105	-0.22279		-0.42285	-0.22279		-0.32716	-0.22279
-1.09674	-0.39777		-0.31881	-0.39777		-0.50618	-0.39777
-0.68215	-0.30042		-0.42986	-0.30042		-0.27708	-0.30042
-0.94824	-0.12959		-0.29764	-0.12959		-0.34493	-0.12959
-0.6365	-0.48629		-0.87521	-0.48629		-0.30621	-0.48629
-0.82399	-0.26173		-0.34522	-0.26173		-0.53717	-0.26173
-0.82602	-0.24374		-0.34456	-0.24374		-0.06359	-0.24374
-0.66404	-0.16832		-0.13763	-0.16832		-0.13638	-0.16832
-0.62666	-0.57943		-0.3392	-0.57943		-0.42977	-0.57943
-0.43861	-0.08643		-0.25049	-0.08643		-0.34763	-0.08643
-0.77061	-0.20426		-0.3664	-0.20426		-0.14087	-0.20426
-0.72088	-0.60473		-0.38529	-0.60473		-0.52901	-0.60473
-0.86746	-0.19869		-0.47166	-0.19869		-0.37958	-0.19869
-0.45869	0.047266		-0.15549	0.047266		-0.30324	0.047266
-1.09085	-0.27299		-0.24911	-0.27299		-0.21756	-0.27299
-1.18725	-0.1586		-0.33588	-0.1586		-0.27783	-0.1586
-1.05541	-0.2675		-0.51886	-0.2675		-0.32279	-0.2675
-0.99658	-0.13695		-0.43368	-0.13695		-0.30481	-0.13695
-0.8097	-0.27674		-0.27733	-0.27674		-0.4726	-0.27674
-0.46525	0.14675		-0.27211	0.14675		-0.13547	0.14675
-0.94347	-0.47655		-0.38244	-0.47655		-0.33662	-0.47655
-1.3855	-0.22773		-0.38935	-0.22773		-0.27226	-0.22773
-1.10343	-0.31055		-0.41818	-0.31055		-0.27948	-0.31055
-1.17603	-1.14548		-0.35728	-1.14548		-0.34068	-1.14548
-0.93463	-0.12824		-0.33363	-0.12824		-0.23511	-0.12824
-0.78277	-0.18217		-0.41264	-0.18217		-0.35408	-0.18217
-0.41162	-0.1437		-0.38037	-0.1437		-0.12858	-0.1437
-0.80126	-0.22089		-0.42673	-0.22089		-0.37657	-0.22089
-0.69556	-0.52556		-0.34781	-0.52556		-0.38134	-0.52556
-0.88814	-0.18203		-0.29515	-0.18203		-0.22316	-0.18203
-0.91311	-0.21648		-0.27322	-0.21648		-0.39505	-0.21648
-0.98259	-0.40012		-0.49553	-0.40012		-0.43741	-0.40012
-1.07204	-1.0089		-0.57925	-1.0089		-0.15798	-1.0089
-0.69383	-0.65446		-0.27475	-0.65446		-0.34829	-0.65446
-1.51022	-0.95898		-0.27713	-0.95898		-0.45216	-0.95898
-0.28505	-0.22843		-0.32232	-0.22843		-0.42684	-0.22843
-0.85299	0.004302		-0.64163	0.004302		-0.43953	0.004302
-1.19705	-1.59095		-0.20124	-1.59095		-0.48331	-1.59095
-1.33056	0.033787		-0.28319	0.033787		-0.10741	0.033787
-1.02683	-0.24457		-0.2788	-0.24457		0.328838	-0.24457
-1.02419	-0.8287		-0.51059	-0.8287		-0.50309	-0.8287
-0.69972	-0.08477		-0.05125	-0.08477		0.120654	-0.08477
-0.80631	-0.0964		-0.46052	-0.0964		-0.3072	-0.0964
-0.6695	-0.86874		-0.62042	-0.86874		-0.31486	-0.86874
-0.68234	-0.46616		-0.37858	-0.46616		-0.45816	-0.46616
-0.92467	-0.2195		-0.27241	-0.2195		-0.08347	-0.2195
-1.07637	-0.08738		-0.1803	-0.08738		-0.44432	-0.08738
-0.98383	-0.24141		-0.11222	-0.24141		-0.3291	-0.24141
-0.7535	-0.24838		-0.42867	-0.24838		-0.42641	-0.24838
-0.50863	-0.19338		-0.20027	-0.19338		-0.17279	-0.19338
-1.07422	-0.59012		-0.48456	-0.59012		-0.52406	-0.59012
-0.84493	-0.24593		-0.4354	-0.24593		-0.36318	-0.24593
-0.84384	-0.32465		-0.21351	-0.32465		-0.31172	-0.32465
-1.04097	-0.22693		-0.21271	-0.22693		-0.27385	-0.22693
-0.76548	-0.3085		-0.04384	-0.3085		-0.13091	-0.3085
-0.74947	-0.0301		-0.02924	-0.0301		-0.33019	-0.0301
-0.69676	-0.47559		-0.50805	-0.47559		-0.22591	-0.47559
-0.48997	-0.05024		-0.14924	-0.05024		-0.30785	-0.05024
-0.90539	-0.31001		-0.28435	-0.31001		-0.54208	-0.31001
-0.7921	-0.49218		-0.23077	-0.49218		-0.17385	-0.49218
-1.22899	-0.25943		-0.39642	-0.25943		-0.52532	-0.25943
-0.52249	-0.62826		-0.297	-0.62826		-0.45343	-0.62826
-0.94914	-0.07768		-0.50136	-0.07768		0.013785	-0.07768
-1.26996	-0.08136		-0.69234	-0.08136		-0.56193	-0.08136
-0.2959	-0.15079		-0.22104	-0.15079		-0.02548	-0.15079
-1.41727	-1.15869		-0.47998	-1.15869		-0.6604	-1.15869
-1.01244	-0.18222		-0.41134	-0.18222		-0.30337	-0.18222
-0.62306	-0.08713		-0.28763	-0.08713		-0.33782	-0.08713
-0.81478	-0.18692		-0.36942	-0.18692		-0.54356	-0.18692
-0.79033	-0.46024		-0.19612	-0.46024		-0.46647	-0.46024
-0.80122	-0.3503		-0.30021	-0.3503		-0.38986	-0.3503
-0.59882	-0.19807		-0.14363	-0.19807		-0.34918	-0.19807
-1.16177	-0.03482		-0.58005	-0.03482		-0.34616	-0.03482
-0.20752	-0.27883		-0.49295	-0.27883		-0.23928	-0.27883
-1.07083	-0.54113		-0.15247	-0.54113		-0.38603	-0.54113
-0.97083	-0.38065		-0.25989	-0.38065		-0.89263	-0.38065
-0.76905	-0.1258		-0.42865	-0.1258		-0.43784	-0.1258
-0.9491	-0.39391		-0.28685	-0.39391		-0.49314	-0.39391
-0.61501	-1.08663		-0.32522	-1.08663		-0.35421	-1.08663
-0.92817	-0.39701		-0.27595	-0.39701		-0.55587	-0.39701
-0.98261	-0.13021		-0.39083	-0.13021		-0.39532	-0.13021
-0.63542	-0.07305		-0.08775	-0.07305		-0.17182	-0.07305
-0.51363	-0.25125		-0.4689	-0.25125		-0.4445	-0.25125
-1.15315	-0.35408		-0.34156	-0.35408		-0.61487	-0.35408
-1.23283	-0.07356		-0.3592	-0.07356		-0.56772	-0.07356
-1.15445	0.061741		-0.37746	0.061741		-0.24769	0.061741
-0.90556	-0.56739		-0.46187	-0.56739		-0.54377	-0.56739
-1.30495	-0.09256		-0.58103	-0.09256		-0.85069	-0.09256
-0.80708	-0.14719		-0.48567	-0.14719		-0.30791	-0.14719
-0.74419	-0.00367		-0.23514	-0.00367		-0.57678	-0.00367
-0.81164	-0.50927		-0.36377	-0.50927		-0.32554	-0.50927
-1.17871	-0.08058		-0.44999	-0.08058		-0.66405	-0.08058
-1.05773	-0.04687		-0.08246	-0.04687		-0.3537	-0.04687
-0.89481	-0.00103		-0.42125	-0.00103		-0.54269	-0.00103
-0.52026	-0.27246		-0.45371	-0.27246		-0.51314	-0.27246
-0.96277	-0.3711		-0.29105	-0.3711		-0.24237	-0.3711
-1.16061	-0.15316		-0.37547	-0.15316		-0.23808	-0.15316
-0.4484	-0.30489		-0.37206	-0.30489		-0.20889	-0.30489
-0.67645	-0.19601		-0.2917	-0.19601		-0.2891	-0.19601
-0.64176	-0.22917		-0.2621	-0.22917		-0.46344	-0.22917
-0.59311	-0.05403		-0.40253	-0.05403		-0.12224	-0.05403
-0.98597	-0.19638		-0.41851	-0.19638		-0.43754	-0.19638
-0.21914	-0.2162		-0.43363	-0.2162		-0.33018	-0.2162
-0.70531	-0.32811		-0.7819	-0.32811		-0.30251	-0.32811
-0.53593	-0.82743		-0.41172	-0.82743		-0.01425	-0.82743
-0.72462	-0.05468		-0.40693	-0.05468		-0.2496	-0.05468
-0.43018	-0.13481		-0.36883	-0.13481		-0.37566	-0.13481
-0.97817	-0.26551		-0.46284	-0.26551		-0.62668	-0.26551
-0.93951	-0.4021		-0.50712	-0.4021		-0.55987	-0.4021
-0.12763	-0.31837		-0.21483	-0.31837		-0.13517	-0.31837
-1.3194	-0.34175		-0.45826	-0.34175		-0.70451	-0.34175
-0.88825	-0.43349		-0.43877	-0.43349		-0.20374	-0.43349
-0.6126	-0.31059		-0.3553	-0.31059		-0.09798	-0.31059
-1.22849	-0.53926		-0.14597	-0.53926		-0.26138	-0.53926
-1.28428	-0.56622		-0.30894	-0.56622		-0.35355	-0.56622
-0.79178	-0.27842		-0.18732	-0.27842		-0.29105	-0.27842
-1.18732	-0.16679		-0.33917	-0.16679		-0.29532	-0.16679
-0.90581	-0.2034		-0.22074	-0.2034		-0.39803	-0.2034
-0.70504	-0.23743		-0.53534	-0.23743		0.174219	-0.23743
-0.89016	-0.55699		-0.41682	-0.55699		-0.43944	-0.55699
-0.3877	-0.43247		-0.34421	-0.43247		-0.57004	-0.43247
-0.7912	-0.27446		-0.22769	-0.27446		-0.2728	-0.27446
-0.62902	-1.2836		-0.33267	-1.2836		-0.43862	-1.2836
-0.59222	-0.35438		-0.46389	-0.35438		-0.31655	-0.35438
-1.4839	-0.69756		-0.54257	-0.69756		-0.4106	-0.69756
-0.68197	-0.14725		-0.62094	-0.14725		-0.25877	-0.14725
-1.16591	-0.07185		-0.2958	-0.07185		-0.66928	-0.07185
-0.80319	-0.02219		-0.29732	-0.02219		-0.43844	-0.02219
-0.85217	-0.58861		-0.54804	-0.58861		-0.45661	-0.58861
-1.10715	-0.66455		-0.41395	-0.66455		-0.35753	-0.66455
-0.62459	-0.05582		-0.12664	-0.05582		-0.31764	-0.05582
-0.95968	-0.45539		-0.33414	-0.45539		-0.36366	-0.45539
-0.70873	-0.29082		-0.42499	-0.29082		-0.36228	-0.29082
-1.25522	-0.27077		-0.35219	-0.27077		-0.70004	-0.27077
-1.26527	-0.38314		-0.40465	-0.38314		-0.5217	-0.38314
-1.32155	-0.34536		-0.58545	-0.34536		-0.30382	-0.34536
-0.69318	-0.35399		-0.5555	-0.35399		-0.49531	-0.35399
-0.99345	-0.4822		-0.34336	-0.4822		-0.33312	-0.4822
-1.04684	-0.12614		-0.42306	-0.12614		-0.19628	-0.12614
-0.05789	-0.18371		-0.46835	-0.18371		-0.81747	-0.18371
-0.8375	-0.46169		-0.3899	-0.46169		-0.67777	-0.46169
-0.93732	-0.52371		-0.50975	-0.52371		-0.45962	-0.52371
-0.7182	-0.7686		-0.27037	-0.7686		-0.30221	-0.7686
-0.6393	-0.15707		-0.702	-0.15707		-0.26724	-0.15707
-1.00477	-0.67966		-0.56999	-0.67966		-0.42645	-0.67966
-0.89638	-0.14249		-0.11	-0.14249		-0.25872	-0.14249
-1.06009	-0.30514		-0.37154	-0.30514		-0.57339	-0.30514
-1.5743	-0.72652		-0.1539	-0.72652		-0.53594	-0.72652
-0.23563	-0.44345		-0.38173	-0.44345		-0.10711	-0.44345
-0.71136	-0.21043		-0.27286	-0.21043		-0.33263	-0.21043
-1.35277	-0.21956		-0.30429	-0.21956		-0.59341	-0.21956
-0.91331	-0.62894		-0.45207	-0.62894		-0.35043	-0.62894
-0.86796	-0.15323		-0.32248	-0.15323		-0.2351	-0.15323
-0.84162	-0.39371		-0.3892	-0.39371		-0.35319	-0.39371
-0.3945	-0.07947		-0.25189	-0.07947		-0.22751	-0.07947
-0.52952	-0.22874		-0.2805	-0.22874		-0.12684	-0.22874
-1.10672	-1.01392		-0.27283	-1.01392		-0.37812	-1.01392
-0.6876	-0.88464		-0.53874	-0.88464		-0.35123	-0.88464
-1.01357	-0.12499		-0.40436	-0.12499		-0.51039	-0.12499
-0.73938	-0.22454		-0.33688	-0.22454		-0.15945	-0.22454
-1.06629	-0.50616		-0.17819	-0.50616		-0.63865	-0.50616
-0.98219	0.004977		-0.51338	0.004977		-0.22834	0.004977
-0.83352	-0.15204		-0.41721	-0.15204		-0.41266	-0.15204
-0.67608	-0.334		-0.20008	-0.334		-0.27966	-0.334
-0.86363	-0.15171		-0.41246	-0.15171		-0.27897	-0.15171
-0.76097	-0.08728		-0.42038	-0.08728		-0.28215	-0.08728
-0.72029	-1.28474		-0.6033	-1.28474		-0.23828	-1.28474
-1.27953	-1.35961		-0.37021	-1.35961		-0.89267	-1.35961
-1.16246	-0.58558		-0.27737	-0.58558		-0.1642	-0.58558
-1.06563	-0.50699		-0.36132	-0.50699		-0.50992	-0.50699
-1.259	-0.18439		-0.32517	-0.18439		-0.57268	-0.18439
-0.70482	-0.62664		-0.33327	-0.62664		-0.17666	-0.62664
-1.42389	-0.09475		-0.35982	-0.09475		-0.55585	-0.09475
-0.48031	-0.40515		-0.36896	-0.40515		-0.3225	-0.40515
-1.69237	-0.36935		-0.13944	-0.36935		-0.31652	-0.36935
-0.60742	-0.15633		-0.58731	-0.15633		-0.06252	-0.15633
-0.77837	-0.16635		-0.16731	-0.16635		-0.33242	-0.16635
-0.68175	-0.13031		-0.24968	-0.13031		-0.15386	-0.13031
-0.75944	-0.12511		-0.70564	-0.12511		-0.24195	-0.12511
-0.89726	-0.04884		-0.3026	-0.04884		-0.39259	-0.04884
-0.46864	-0.72506		-0.20225	-0.72506		-0.31075	-0.72506
-0.97057	-0.05701		-0.41161	-0.05701		-0.0132	-0.05701
-0.6232	-0.17559		-0.44189	-0.17559		-0.23486	-0.17559
-1.24448	-0.51778		-0.44012	-0.51778		-0.35325	-0.51778
-0.58787	-0.24177		-0.13902	-0.24177		-0.27934	-0.24177
-0.9626	-0.11276		0.019768	-0.11276		-0.769	-0.11276
-1.17735	-0.3168		-0.35446	-0.3168		-0.40948	-0.3168
-0.9203	-0.13342		-0.04465	-0.13342		0.050367	-0.13342
-1.0122	-0.30853		-0.20781	-0.30853		0.178864	-0.30853
-1.0401	-0.61743		-0.37263	-0.61743		-0.53718	-0.61743
-1.19457	-0.03762		-0.11802	-0.03762		-0.62248	-0.03762
-0.71165	-0.51776		-0.3866	-0.51776		-0.25854	-0.51776
-1.3184	-0.48814		-0.38946	-0.48814		-0.4904	-0.48814
-1.09966	-0.24479		-0.4457	-0.24479		-0.33554	-0.24479
-0.50785	-0.08126		-0.16498	-0.08126		0.324982	-0.08126
-0.76576	-0.26985		-0.54263	-0.26985		-0.07864	-0.26985
-1.10428	-0.14051		-0.10083	-0.14051		-0.75622	-0.14051
-0.73993	-0.3063		-0.57755	-0.3063		-0.45398	-0.3063
0.17369	-0.29523		-0.48872	-0.29523		-0.15815	-0.29523
-0.21557	-0.1965		-0.24831	-0.1965		-0.05551	-0.1965
-0.92552	-0.0014		-0.4461	-0.0014		-0.42423	-0.0014
-0.43049	-0.72559		-0.25003	-0.72559		-0.30744	-0.72559
-1.08721	-0.09973		-0.5185	-0.09973		-1.29544	-0.09973
-0.7053	-0.06087		-0.4954	-0.06087		-0.26456	-0.06087
-0.96826	-0.16333		-0.39827	-0.16333		-0.34522	-0.16333
-0.81679	-0.08408		-0.42535	-0.08408		-0.36111	-0.08408
-0.77278	-0.01027		-0.12409	-0.01027		-0.25323	-0.01027
-0.92933	-0.16033		-0.26895	-0.16033		-0.42915	-0.16033
-0.06867	-0.02022		-0.2991	-0.02022		-0.2926	-0.02022
-0.33452	-0.15056		-0.57018	-0.15056		-0.51953	-0.15056
-1.12155	-0.61557		-0.44322	-0.61557		-0.39979	-0.61557
-0.85332	-0.23449		-0.43501	-0.23449		-0.34378	-0.23449
-0.76355	-0.51264		-0.52206	-0.51264		-0.50728	-0.51264
-0.88071	-0.16415		-0.36478	-0.16415		-0.55602	-0.16415
-0.65627	-0.24133		-0.28714	-0.24133		-0.2823	-0.24133
-0.81933	-0.27054		-0.25532	-0.27054		-0.28658	-0.27054
-0.41932	-0.08825		-0.32852	-0.08825		-0.16867	-0.08825
-0.75539	-0.47331		-0.17672	-0.47331		-0.3166	-0.47331
-0.69372	-0.19812		-0.32172	-0.19812		-0.0803	-0.19812
-0.99357	-0.34857		-0.54054	-0.34857		-0.37927	-0.34857
-0.85788	-0.27591		-0.34761	-0.27591		-0.32361	-0.27591
-0.49607	-0.46084		-0.29518	-0.46084		-0.08975	-0.46084
-0.99681	-0.44806		-0.30519	-0.44806		-0.26283	-0.44806
-0.95291	-0.13948		-0.27544	-0.13948		-0.39799	-0.13948
-1.62338	-0.47126		-0.26927	-0.47126		-0.2873	-0.47126
-0.48767	-0.2093		-0.62913	-0.2093		-0.25228	-0.2093
-0.71217	-0.26275		-0.30887	-0.26275		-0.23639	-0.26275
-0.81967	-0.04425		-0.42336	-0.04425		-0.17748	-0.04425
-0.87601	-0.04468		-0.43313	-0.04468		-0.34318	-0.04468
-0.69491	-0.40927		-0.4816	-0.40927		-0.26274	-0.40927
-0.79191	-0.2771		-0.29348	-0.2771		-0.38043	-0.2771
-0.59731	-0.2751		-0.29907	-0.2751		-0.39229	-0.2751
-0.65286	-0.13997		-0.32774	-0.13997		-0.1873	-0.13997
-0.42454	-0.11523		-0.26875	-0.11523		-0.06875	-0.11523
-0.75179	-0.41355		-0.27496	-0.41355		-0.53821	-0.41355
-0.76338	-0.28634		-0.3591	-0.28634		-0.33392	-0.28634
-1.10355	0.022442		-0.36402	0.022442		-0.28998	0.022442
-1.08079	-0.03922		0.066168	-0.03922		0.113631	-0.03922
-0.81777	-0.62148		-0.4255	-0.62148		-0.3787	-0.62148
-1.31329	-0.15086		-0.24041	-0.15086		-0.22653	-0.15086
-1.04757	-0.26271		-0.46508	-0.26271		-0.30289	-0.26271
-0.9765	0.008993		-0.24126	0.008993		-0.33515	0.008993
-0.84231	-0.05651		-0.44698	-0.05651		-0.3581	-0.05651
-0.87717	-0.2488		-0.22722	-0.2488		-0.42262	-0.2488
-1.0511	0.035204		-0.23641	0.035204		-0.27131	0.035204
-0.68173	-0.42002		-0.28476	-0.42002		-0.47981	-0.42002
-1.30973	-0.05468		-0.33216	-0.05468		-0.14807	-0.05468
-0.76355	-0.1427		-0.36255	-0.1427		-0.23411	-0.1427
-0.67681	-0.14277		-0.3854	-0.14277		-0.51913	-0.14277
-0.74819	-0.28688		-0.21497	-0.28688		-0.25608	-0.28688
-0.04915	-0.00102		-0.25	-0.00102		0.041493	-0.00102
-1.0362	-0.51071		-0.10679	-0.51071		-0.27293	-0.51071
-0.78345	-0.22356		-0.3601	-0.22356		-0.27777	-0.22356
-1.16736	0.004799		-0.29126	0.004799		-0.3168	0.004799
-0.52948	-0.82407		-0.52508	-0.82407		-0.21866	-0.82407
-0.68802	-0.30915		-0.5914	-0.30915		-0.62452	-0.30915
-0.58034	-0.03836		-0.65154	-0.03836		-0.11305	-0.03836
-1.183	-0.35253		-0.34921	-0.35253		-0.2479	-0.35253
-0.13923	-0.16662		-0.16535	-0.16662		-0.13603	-0.16662
-1.11784	-0.24625		-0.19626	-0.24625		-0.11552	-0.24625
-0.53968	-0.14478		-0.16031	-0.14478		-0.258	-0.14478
-1.1172	-0.47772		-0.23113	-0.47772		-0.92531	-0.47772
-0.80442	-0.04753		-0.40319	-0.04753		-0.18797	-0.04753
-0.56338	-0.10335		-0.51528	-0.10335		-0.26866	-0.10335
-0.87706	-0.23392		-0.54856	-0.23392		-0.55435	-0.23392
-0.94554	-0.77146		-0.36461	-0.77146		-0.31085	-0.77146
-0.68795	-0.21109		-0.55975	-0.21109		-0.4468	-0.21109
-0.58456	-0.13045		-0.36132	-0.13045		0.02485	-0.13045
-0.75145	-0.14013		-0.43178	-0.14013		-0.26209	-0.14013
-0.72497	-0.35411		-0.26229	-0.35411		-0.33966	-0.35411
-1.09078	-0.64565		-0.44199	-0.64565		-0.59388	-0.64565
-1.4763	-0.20442		-0.47936	-0.20442		-0.81059	-0.20442
-0.67585	-0.24803		-0.45087	-0.24803		-0.35236	-0.24803
-0.18949	-0.27947		-0.27151	-0.27947		-0.28366	-0.27947
-1.34268	-0.59236		-0.60055	-0.59236		-0.43762	-0.59236
-0.58504	-0.15163		-0.42866	-0.15163		-0.04034	-0.15163
-0.85372	-0.45821		-0.43669	-0.45821		-0.1751	-0.45821
-1.06877	-0.00733		-0.25551	-0.00733		-0.17406	-0.00733
-0.82867	-0.01885		-0.29776	-0.01885		0.090691	-0.01885
-0.72316	-0.92473		-0.58777	-0.92473		-0.28065	-0.92473
-0.96458	-0.30821		-0.26646	-0.30821		-0.22937	-0.30821
-0.74851	-0.29641		-0.41626	-0.29641		-0.33616	-0.29641
-1.14534	-0.30684		-0.31903	-0.30684		-0.62015	-0.30684
-0.87353	-0.04631		-0.3751	-0.04631		-0.11439	-0.04631
-1.24944	-0.77092		-0.41033	-0.77092		-0.44478	-0.77092
-0.99793	-0.83945		-0.59305	-0.83945		-0.50833	-0.83945
-1.30412	-0.41228		-0.36062	-0.41228		-0.52676	-0.41228
-0.8118	-0.37625		-0.38238	-0.37625		-0.37138	-0.37625
-1.08046	-0.42262		-0.31452	-0.42262		-0.22747	-0.42262
-1.30494	-0.20554		-0.55924	-0.20554		-0.37923	-0.20554
-0.8674	-0.65062		-0.18118	-0.65062		-0.43347	-0.65062
-0.87004	-0.33573		-0.38411	-0.33573		-0.49403	-0.33573
-0.39853	-0.07891		-0.34615	-0.07891		-0.12187	-0.07891
-0.56524	-0.24123		-0.24094	-0.24123		-0.33758	-0.24123
-1.4294	-0.23613		-0.23192	-0.23613		-0.94942	-0.23613
-1.2501	-0.32256		-0.39376	-0.32256		-0.49121	-0.32256
-0.5542	-0.19589		-0.23228	-0.19589		-0.4751	-0.19589
-0.46492	-0.24251		-0.37552	-0.24251		-0.25505	-0.24251
-1.05429	-0.47778		-0.38655	-0.47778		-0.42675	-0.47778
-1.44115	-0.37042		-0.31436	-0.37042		-0.17877	-0.37042
-1.14732	-0.18353		-0.64859	-0.18353		-0.53254	-0.18353
-0.47695	-0.67832		-0.33368	-0.67832		-0.45608	-0.67832
-0.32661	-0.52639		-0.35944	-0.52639		-0.38669	-0.52639
-0.32757	-0.22142		-0.45105	-0.22142		-0.46007	-0.22142
-1.20154	-0.43265		-0.17634	-0.43265		-0.70774	-0.43265
-0.8728	-0.03961		-0.27111	-0.03961		0.007268	-0.03961
-0.81025	-0.32938		-0.49111	-0.32938		-0.55277	-0.32938
-0.62995	-0.22051		-0.40706	-0.22051		-0.22949	-0.22051
-1.35744	-0.2083		-0.47553	-0.2083		-0.48984	-0.2083
-1.3371	-0.26897		-0.3103	-0.26897		-0.18848	-0.26897
-1.16222	-0.27718		-0.46988	-0.27718		-0.44778	-0.27718
-0.72777	-0.11559		-0.56314	-0.11559		-0.56635	-0.11559
-1.18332	-0.042		-0.26937	-0.042		-0.30643	-0.042
-0.85664	-0.562		-0.61384	-0.562		-0.36005	-0.562
-1.07368	-0.00911		-0.52184	-0.00911		-0.12791	-0.00911
-1.20899	-1.18941		-0.44446	-1.18941		-0.77566	-1.18941
-0.86001	-0.09553		-0.50801	-0.09553		-0.41967	-0.09553
-0.60603	0.035319		-0.5351	0.035319		-0.26521	0.035319
-1.23993	-0.10328		-0.40218	-0.10328		-0.37879	-0.10328
-0.46958	-0.72951		-0.36307	-0.72951		-0.27202	-0.72951
-0.60389	-0.15112		-0.31347	-0.15112		-0.2417	-0.15112
-0.643	-0.02145		-0.23762	-0.02145		-0.49551	-0.02145
-1.53375	-0.49669		-0.18197	-0.49669		-0.37219	-0.49669
-0.82148	-0.19837		-0.32188	-0.19837		-0.68485	-0.19837
-1.2931	-0.52287		-0.35585	-0.52287		-0.31839	-0.52287
-0.93063	-0.3308		-0.4335	-0.3308		-0.29917	-0.3308
-1.34791	-0.22359		-0.25544	-0.22359		-0.44814	-0.22359
-0.73116	-0.30896		-0.3221	-0.30896		-0.42384	-0.30896
-1.03082	-0.17632		-0.6124	-0.17632		-0.51689	-0.17632
-0.72837	-0.20475		-0.57309	-0.20475		-0.48166	-0.20475
-0.83329	-0.66527		-0.54969	-0.66527		-0.23069	-0.66527
-0.93367	-0.14791		-0.27576	-0.14791		-0.47056	-0.14791
-1.25093	-0.1562		-0.50685	-0.1562		-0.53935	-0.1562
-0.71228	0.033164		-0.13927	0.033164		-0.2229	0.033164
-0.8986	-0.03789		-0.4513	-0.03789		-0.43251	-0.03789
-0.61713	-0.05889		-0.61245	-0.05889		-0.02425	-0.05889
-0.87424	-0.13818		-0.3084	-0.13818		-0.52427	-0.13818
-0.67756	-0.20279		-0.52418	-0.20279		-0.2692	-0.20279
-1.22117	-0.14766		-0.54417	-0.14766		-0.40304	-0.14766
-1.20102	-0.40446		-0.33194	-0.40446		-0.23202	-0.40446
-1.12863	-0.31486		-0.43711	-0.31486		-0.34181	-0.31486
-0.25098	-0.5789		-0.53298	-0.5789		-0.15466	-0.5789
-0.77495	-0.31464		-0.25662	-0.31464		-0.55776	-0.31464
-0.98371	0.033091		0.142906	0.033091		-0.10146	0.033091
-1.28556	-0.09834		-0.28433	-0.09834		-0.44713	-0.09834
-0.6319	-0.37397		-0.47168	-0.37397		-0.3331	-0.37397
-0.80523	-0.00264		-0.14353	-0.00264		-0.43073	-0.00264
-0.8907	-0.32619		-0.34878	-0.32619		-0.80751	-0.32619
-1.52354	-0.1934		-0.53764	-0.1934		-0.55714	-0.1934
-0.43245	-0.17957		-0.42595	-0.17957		-0.18803	-0.17957
-0.7731	-0.62816		-0.29698	-0.62816		-0.38274	-0.62816
-1.19624	-0.69185		-0.90613	-0.69185		-0.24146	-0.69185
-0.57836	-0.15213		-0.44169	-0.15213		-0.21782	-0.15213
-0.88798	-0.08867		-0.31212	-0.08867		-0.18839	-0.08867
-0.90541	-0.01761		-0.42236	-0.01761		-0.2882	-0.01761
-0.60446	-0.2504		-0.14382	-0.2504		-0.22852	-0.2504
-0.6806	-0.10667		-0.29828	-0.10667		-0.26261	-0.10667
-0.82775	-0.39074		-0.29673	-0.39074		-0.4306	-0.39074
-0.72965	-0.47713		-0.30064	-0.47713		-0.13	-0.47713
-1.20704	-0.86109		-0.27635	-0.86109		-0.1443	-0.86109
-0.57295	-0.13896		-0.41606	-0.13896		-0.31681	-0.13896
-1.0984	-0.31459		0.148226	-0.31459		-0.46117	-0.31459
-1.06158	-1.03102		-0.30263	-1.03102		-0.77545	-1.03102
-1.38023	-0.73316		-0.26485	-0.73316		-0.57032	-0.73316
-0.85082	-0.18099		-0.42162	-0.18099		-0.38663	-0.18099
-0.66402	-0.18334		-0.45275	-0.18334		-0.3445	-0.18334
-1.24986	-0.02317		-0.39892	-0.02317		-0.35413	-0.02317
-0.47695	-0.04335		-0.13661	-0.04335		-0.28074	-0.04335
-0.53694	-0.29457		-0.51543	-0.29457		-0.21574	-0.29457
-0.99575	-0.09596		-0.33809	-0.09596		-0.02163	-0.09596
-1.03722	-0.23745		-0.25248	-0.23745		-0.48975	-0.23745
-0.62811	-0.21085		-0.36097	-0.21085		-0.31013	-0.21085
-1.11279	-0.96233		-0.41779	-0.96233		-0.20095	-0.96233
-0.57284	-0.28249		-0.0775	-0.28249		0.010425	-0.28249
-0.90713	-0.02124		-0.42046	-0.02124		-0.27495	-0.02124
-0.91126	-0.50479		-0.49445	-0.50479		-0.29905	-0.50479
-0.78373	-0.09459		-0.30307	-0.09459		-0.3198	-0.09459
-0.95801	-0.38531		-0.11493	-0.38531		-0.33362	-0.38531
-0.78459	-0.14167		-0.25992	-0.14167		-0.34661	-0.14167
-0.76843	-0.2651		-0.49509	-0.2651		-0.30304	-0.2651
-1.06712	-0.10918		-0.31862	-0.10918		-0.69139	-0.10918
-0.81177	-0.16514		-0.49598	-0.16514		-0.29955	-0.16514
-0.97033	-0.06724		-0.3008	-0.06724		-0.47708	-0.06724
-1.01693	-0.12905		-0.21806	-0.12905		-0.32435	-0.12905
-1.14592	-0.11566		-0.25071	-0.11566		-0.35166	-0.11566
-0.15523	-0.3073		-0.28936	-0.3073		-0.00665	-0.3073
-1.18936	-0.75921		-0.47671	-0.75921		-0.53554	-0.75921
-0.62515	-0.94971		-0.17437	-0.94971		-0.40654	-0.94971
-0.70848	0.07309		-0.30081	0.07309		-0.2614	0.07309
-1.27385	-0.47104		-0.32551	-0.47104		-0.41332	-0.47104
-0.45209	-0.29086		-0.78184	-0.29086		-0.55194	-0.29086
-0.60762	-0.16398		-0.20721	-0.16398		-0.21771	-0.16398
-0.84171	-0.54066		-0.46647	-0.54066		-0.35115	-0.54066
-0.05082	-0.15357		-0.48085	-0.15357		-0.10905	-0.15357
-0.49269	-0.13107		-0.13584	-0.13107		-0.17586	-0.13107
-0.55693	-0.08828		-0.35127	-0.08828		0.048752	-0.08828
-0.49439	-0.34667		-0.49602	-0.34667		-0.1995	-0.34667
-0.35608	-0.11742		-0.38633	-0.11742		-0.11082	-0.11742
-0.63571	-0.36603		-0.32784	-0.36603		-0.11139	-0.36603
-0.78215	-0.12358		-0.34237	-0.12358		-0.32159	-0.12358
-1.11786	-0.13932		-0.12342	-0.13932		-0.23628	-0.13932
-0.89553	-0.78567		-0.31614	-0.78567		-0.58204	-0.78567
-1.21451	-0.61552		-0.5166	-0.61552		-0.31009	-0.61552
-1.11231	-0.44945		-0.40875	-0.44945		-0.40471	-0.44945
-0.93766	-0.33407		-0.33433	-0.33407		-0.0698	-0.33407
-0.56902	-0.03004		-0.40028	-0.03004		-0.04154	-0.03004
-0.42248	-0.08752		-0.5396	-0.08752		-0.0733	-0.08752
-0.69201	-0.2601		-0.40401	-0.2601		-0.34368	-0.2601
-0.92778	-0.28053		-0.2561	-0.28053		-0.24334	-0.28053
-1.0905	-0.99728		-0.33876	-0.99728		-0.60735	-0.99728
-0.93109	-0.97155		-0.30278	-0.97155		-0.38949	-0.97155
-0.86237	-0.4346		-0.12109	-0.4346		-0.27776	-0.4346
-0.71105	-0.19342		-0.22545	-0.19342		-0.35886	-0.19342
-0.77847	-0.22544		-0.374	-0.22544		-0.43081	-0.22544
-1.16284	-0.35635		-0.38617	-0.35635		-0.62186	-0.35635
-0.88041	-0.29969		-0.5121	-0.29969		-0.48976	-0.29969
-0.94871	3.45e-05		-0.12561	3.45e-05		-0.03782	3.45e-05
-0.99751	-0.09707		-0.45038	-0.09707		-0.28682	-0.09707
-0.92557	-0.40165		-0.65982	-0.40165		-0.71402	-0.40165
-0.77241	-0.28538		-0.33086	-0.28538		-0.3149	-0.28538
-0.86411	-0.68167		-0.5192	-0.68167		-0.28779	-0.68167
-0.73298	-0.2784		-0.4186	-0.2784		-0.33387	-0.2784
-0.6621	-0.143		-0.64159	-0.143		-0.57097	-0.143
-0.59179	-0.38564		-0.32093	-0.38564		-0.26987	-0.38564
-1.08075	-0.34678		-0.26608	-0.34678		-0.39498	-0.34678
-0.57883	-0.36142		-0.08379	-0.36142		-0.4809	-0.36142
-0.82629	-0.47105		-0.68726	-0.47105		-0.86939	-0.47105
-1.32602	-0.70686		-0.4738	-0.70686		-0.51252	-0.70686
-0.99376	-0.42552		-0.45888	-0.42552		-0.22481	-0.42552
-1.13595	-0.60482		-0.67456	-0.60482		-0.41386	-0.60482
-0.62321	-0.22443		-0.50113	-0.22443		-0.18527	-0.22443
-1.05546	-0.04776		-0.36347	-0.04776		-0.2902	-0.04776
-0.90504	-0.19149		-0.44633	-0.19149		-0.37431	-0.19149
-0.39808	-0.3767		-0.31997	-0.3767		-0.31206	-0.3767
-0.25467	-0.37555		-0.36197	-0.37555		-0.17233	-0.37555
-0.58042	-0.32201		-0.23176	-0.32201		-0.16936	-0.32201
-0.61831	0.010582		-0.32339	0.010582		-0.33222	0.010582
-0.89737	-0.35227		-0.4182	-0.35227		-0.3015	-0.35227
-0.55612	-0.15616		-0.20003	-0.15616		-0.05473	-0.15616
-1.01094	-0.12306		-0.44424	-0.12306		-0.27698	-0.12306
-1.01645	-0.59472		-0.39803	-0.59472		-0.19139	-0.59472
-0.65991	-0.37447		-0.45971	-0.37447		-0.15641	-0.37447
-1.50589	-0.09046		-0.2379	-0.09046		-0.47614	-0.09046
-0.63267	-0.22002		-0.72378	-0.22002		-0.0258	-0.22002
-1.08623	-0.37933		-0.31357	-0.37933		-0.22804	-0.37933
-0.6013	-0.54545		-0.28101	-0.54545		-0.19215	-0.54545
-0.96981	-0.62707		-0.30057	-0.62707		-0.19258	-0.62707
-0.92399	-0.08954		-0.50925	-0.08954		-0.29997	-0.08954
-0.78246	-0.2741		-0.2501	-0.2741		-0.41633	-0.2741
-0.75084	-0.49408		-0.69806	-0.49408		-0.46821	-0.49408
-0.44722	-0.28551		-0.56974	-0.28551		-0.10421	-0.28551
-1.16	-0.96947		-0.21865	-0.96947		-0.36595	-0.96947
-0.5758	-0.40803		-0.56161	-0.40803		-0.26318	-0.40803
-1.01175	-0.30758		-0.38354	-0.30758		-0.40839	-0.30758
-0.91718	-0.24668		-0.36944	-0.24668		-0.2881	-0.24668
-0.87279	-0.23336		-0.4317	-0.23336		-0.27354	-0.23336
-0.55843	-0.29055		-0.39678	-0.29055		-0.16564	-0.29055
-1.15768	-0.56017		-0.39789	-0.56017		-0.34613	-0.56017
-0.50148	-0.21559		-0.37969	-0.21559		-0.26979	-0.21559
-0.60795	-0.38383		-0.16281	-0.38383		-0.29792	-0.38383
-0.88833	-0.59447		-0.3185	-0.59447		-0.77587	-0.59447
-0.83399	-0.08202		-0.44394	-0.08202		-0.14926	-0.08202
-0.50638	-0.19522		-0.63551	-0.19522		-0.60191	-0.19522
-0.6617	-0.18362		-0.43502	-0.18362		-0.33461	-0.18362
-0.62908	-0.18491		-0.30921	-0.18491		-0.27684	-0.18491
-0.91135	0.038249		-0.13324	0.038249		-0.25174	0.038249
-0.75946	-0.30649		-0.19354	-0.30649		-0.66571	-0.30649
-0.53502	-0.4256		-0.46613	-0.4256		-0.32978	-0.4256
-0.53363	-0.61149		-0.47102	-0.61149		-0.43831	-0.61149
-1.04796	-0.78306		-0.28008	-0.78306		-0.45675	-0.78306
-0.59038	-0.80649		-0.21297	-0.80649		-0.38791	-0.80649
-0.69062	-0.16013		-0.30407	-0.16013		-0.32552	-0.16013
-1.24635	-0.10682		-0.40441	-0.10682		-0.2764	-0.10682
-0.54742	-0.09427		-0.21296	-0.09427		-0.52836	-0.09427
-0.67894	-0.25601		-0.42453	-0.25601		-0.32655	-0.25601
-0.99457	-0.44942		-0.20725	-0.44942		-0.50448	-0.44942
-0.48174	-0.0456		-0.41685	-0.0456		-0.10697	-0.0456
-0.79848	-0.12624		-0.04632	-0.12624		-0.36798	-0.12624
-0.56381	-0.51842		-0.32551	-0.51842		-0.50172	-0.51842
-0.72474	-0.01176		-0.38979	-0.01176		-0.21137	-0.01176
-0.97506	-0.07378		-0.26328	-0.07378		-0.71586	-0.07378
-0.47323	-1.02953		-0.65126	-1.02953		-0.30165	-1.02953
-1.21168	-0.08593		-0.52482	-0.08593		-0.37259	-0.08593
-0.68666	-0.12046		-0.10636	-0.12046		-0.42569	-0.12046
-1.24548	-0.06149		-0.29597	-0.06149		-0.60504	-0.06149
-1.46756	-0.31505		-0.15829	-0.31505		-0.37101	-0.31505
-0.69064	-0.57332		-0.66852	-0.57332		0.069751	-0.57332
-0.93148	-0.27297		-0.50628	-0.27297		-0.31917	-0.27297
-0.98903	-0.66284		-0.33991	-0.66284		-0.37398	-0.66284
-0.83773	-0.23221		0.087183	-0.23221		-0.41326	-0.23221
-0.8855	-0.17847		-0.19161	-0.17847		-0.38402	-0.17847
-0.72771	-0.50301		-0.25584	-0.50301		-0.31528	-0.50301
-0.88914	-0.82023		-0.66102	-0.82023		-0.40077	-0.82023
-1.41902	-0.17209		-0.13247	-0.17209		-0.54152	-0.17209
-0.6184	-0.02888		-0.14788	-0.02888		-0.18874	-0.02888
-0.88323	-0.63918		-0.42446	-0.63918		-0.51241	-0.63918
-0.67318	-0.72769		-0.30455	-0.72769		-0.438	-0.72769
-0.73067	-0.18218		-0.26655	-0.18218		-0.52667	-0.18218
-1.06959	-0.17601		-0.3547	-0.17601		-0.60558	-0.17601
-0.68958	-0.12117		-0.17281	-0.12117		-0.39513	-0.12117
-0.53105	-0.15463		-0.51959	-0.15463		-0.22941	-0.15463
-0.62611	-0.34603		-0.23538	-0.34603		-0.23734	-0.34603
-0.46127	-0.06511		-0.2801	-0.06511		-0.3016	-0.06511
-0.70096	-0.47031		-0.71765	-0.47031		-0.69381	-0.47031
-1.3311	-0.08927		-0.27579	-0.08927		0.03935	-0.08927
-1.16468	-0.26611		-0.455	-0.26611		-0.29239	-0.26611
-0.84191	-0.42968		-0.35201	-0.42968		-0.50617	-0.42968
-0.53733	-0.3033		-0.23221	-0.3033		-0.26439	-0.3033
-0.24359	-0.10484		-0.44486	-0.10484		-0.23327	-0.10484
-0.98041	0.096419		-0.26617	0.096419		-0.4091	0.096419
-0.51491	-0.09145		-0.44232	-0.09145		-0.29054	-0.09145
-0.95647	-0.40152		-0.46915	-0.40152		-0.314	-0.40152
-0.70478	0.111462		-0.31729	0.111462		0.015338	0.111462
-0.70678	-0.01352		-0.31391	-0.01352		-0.42718	-0.01352
-0.88064	-0.15435		-0.2827	-0.15435		-0.45826	-0.15435
-0.5222	-0.23482		-0.41198	-0.23482		-0.29974	-0.23482
-0.74712	-0.30065		-0.62154	-0.30065		-0.43244	-0.30065
-0.83425	-0.148		-0.15711	-0.148		-0.21151	-0.148
-0.443	-0.09795		-0.2275	-0.09795		-0.17367	-0.09795
-1.38489	-0.02526		-0.27971	-0.02526		-0.3019	-0.02526
-0.75857	-0.24863		-0.56155	-0.24863		-0.43	-0.24863
-0.29462	-0.46023		-0.20663	-0.46023		-0.29608	-0.46023
-0.65188	-0.06281		-0.15039	-0.06281		-0.39475	-0.06281
-1.31759	-0.1476		-0.51876	-0.1476		-0.66022	-0.1476
-0.39983	-0.38642		-0.44965	-0.38642		-0.16714	-0.38642
-1.02767	-0.35158		-0.462	-0.35158		-0.10833	-0.35158
-0.74634	-0.3277		-0.40515	-0.3277		-0.46013	-0.3277
-1.41105	-0.09214		-0.31085	-0.09214		-0.5412	-0.09214
-0.85995	-0.00202		-0.08253	-0.00202		-0.04402	-0.00202
-1.13708	-0.23175		-0.35368	-0.23175		-0.20009	-0.23175
-0.66504	-0.27407		-0.39502	-0.27407		-0.25702	-0.27407
-0.81017	-0.23506		-0.29466	-0.23506		-0.30999	-0.23506
-0.47025	-0.18189		-0.37524	-0.18189		-0.11371	-0.18189
-0.46866	-0.05515		-0.58175	-0.05515		-0.19158	-0.05515
-0.46346	-1.21139		-0.33803	-1.21139		-0.33021	-1.21139
-0.6423	-0.1108		-0.49585	-0.1108		-0.50935	-0.1108
-0.30752	-0.23986		-0.66397	-0.23986		-0.23983	-0.23986
-0.98383	-0.11259		-0.39686	-0.11259		-0.14766	-0.11259
-0.64564	-0.05702		-0.4041	-0.05702		-0.13159	-0.05702
-0.63696	-0.0595		-0.31395	-0.0595		-0.46438	-0.0595
-0.752	-0.27231		-0.48999	-0.27231		-0.3944	-0.27231
-0.81345	-0.2061		-0.40773	-0.2061		0.015796	-0.2061
-1.02004	-0.75074		-0.21116	-0.75074		-0.60314	-0.75074
-1.5232	-0.60189		-0.42702	-0.60189		-0.41693	-0.60189
-0.95963	-1.07731		-0.49839	-1.07731		-0.65721	-1.07731
-0.50165	-0.27573		-0.20926	-0.27573		-0.24859	-0.27573
-0.71935	-0.48957		-0.38645	-0.48957		-0.52582	-0.48957
-1.04081	-0.18214		-0.34217	-0.18214		-0.26662	-0.18214
-0.43604	-0.42102		-0.61309	-0.42102		-0.05956	-0.42102
-0.86703	-0.35966		-0.26207	-0.35966		-0.46487	-0.35966
-1.04404	-0.22111		-0.4655	-0.22111		-0.34498	-0.22111
-0.86685	-0.64217		-0.692	-0.64217		-0.36744	-0.64217
-0.92314	-1.22154		-0.22538	-1.22154		-0.28019	-1.22154
-0.87761	-0.52442		-0.44005	-0.52442		-0.15364	-0.52442
-0.73622	-0.46801		-0.28517	-0.46801		-0.36666	-0.46801
-0.87125	-0.09203		-0.4142	-0.09203		-0.20991	-0.09203
-0.36593	-0.07751		-0.32675	-0.07751		-0.29737	-0.07751
-0.67672	-0.23073		-0.29532	-0.23073		-0.19594	-0.23073
-0.83968	-0.53163		-0.6017	-0.53163		-0.16668	-0.53163
-1.09915	-0.37958		-0.58403	-0.37958		-0.42039	-0.37958
-0.53119	-0.35833		-0.32137	-0.35833		-0.32099	-0.35833
-1.30171	-0.64438		-0.27478	-0.64438		-0.34702	-0.64438
-1.52979	-0.40763		-0.58404	-0.40763		-0.64999	-0.40763
-0.60804	-0.25759		-0.12206	-0.25759		-0.18685	-0.25759
-0.92857	-0.54576		-0.55752	-0.54576		-0.73675	-0.54576
-1.118	-0.28102		-0.48611	-0.28102		-0.41037	-0.28102
-0.41692	-0.08034		-0.33198	-0.08034		-0.13629	-0.08034
-1.18064	-0.16359		-0.39253	-0.16359		-0.47863	-0.16359
-1.28105	-0.39549		-0.68008	-0.39549		-0.35169	-0.39549
-0.70196	-0.70522		0.321414	-0.70522		-0.52401	-0.70522
-1.40874	-0.3977		-0.62788	-0.3977		-0.5583	-0.3977
-0.71906	-0.32043		-0.33712	-0.32043		-0.27467	-0.32043
-0.62808	-0.21186		-0.28872	-0.21186		-0.55898	-0.21186
-0.75929	-0.83807		-0.28065	-0.83807		-0.30128	-0.83807
-0.73884	-0.51347		-0.65513	-0.51347		-0.43849	-0.51347
-0.89097	-0.34058		-0.58116	-0.34058		-0.18617	-0.34058
-0.64295	-0.18489		-0.33698	-0.18489		-0.2807	-0.18489
-0.89332	-0.32427		-0.36415	-0.32427		-0.39291	-0.32427
-1.03329	-0.49572		-0.35661	-0.49572		-0.28234	-0.49572
-0.72876	-0.85977		-0.32369	-0.85977		-0.17879	-0.85977
-0.99855	-0.44076		-0.6379	-0.44076		-0.52791	-0.44076
-0.61844	-0.18001		-0.3905	-0.18001		0.032022	-0.18001
-0.6676	-0.58161		-0.40481	-0.58161		-0.42042	-0.58161
-0.49259	-0.23274		-0.64129	-0.23274		-0.37329	-0.23274
-1.17028	-1.55157		-0.3753	-1.55157		-0.34268	-1.55157
-0.97405	-0.16312		-0.38057	-0.16312		-0.26417	-0.16312
-0.46186	-0.31269		-0.26347	-0.31269		-0.28346	-0.31269
-0.27807	-0.39616		-0.35819	-0.39616		-0.36608	-0.39616
-1.35301	-0.18506		-0.33107	-0.18506		-0.69512	-0.18506
-0.69939	-0.29498		-0.42567	-0.29498		-0.2942	-0.29498
-0.7751	-0.52891		-0.27978	-0.52891		-0.35315	-0.52891
-0.70643	-0.28978		-0.56029	-0.28978		-0.01329	-0.28978
-1.02341	-0.29726		-0.35265	-0.29726		-0.30701	-0.29726
-0.89257	-0.14846		-0.97548	-0.14846		-0.5151	-0.14846
-0.78731	-0.43602		-0.57795	-0.43602		-0.50711	-0.43602
-0.81007	-0.79279		-0.2967	-0.79279		-0.42276	-0.79279
-0.60601	-0.19864		-0.3064	-0.19864		-0.15483	-0.19864
-0.44858	-0.78767		-0.36041	-0.78767		-0.29684	-0.78767
-0.61373	-0.21682		-0.38874	-0.21682		-0.12825	-0.21682
-0.62063	-0.16496		-0.43681	-0.16496		-0.54014	-0.16496
-0.80594	-0.16747		-0.50423	-0.16747		-0.5511	-0.16747
-0.94485	-0.29301		-0.46516	-0.29301		-0.71355	-0.29301
-0.69883	0.005708		-0.34319	0.005708		0.281863	0.005708
-0.99806	-0.1315		0.114596	-0.1315		-0.4471	-0.1315
-1.2898	0.042944		-0.48363	0.042944		-0.41861	0.042944
-0.42211	-0.32381		-0.42267	-0.32381		-0.36215	-0.32381
-1.07807	-0.17388		-0.00075	-0.17388		0.069911	-0.17388
-0.83571	-0.79944		-0.4814	-0.79944		-0.41611	-0.79944
-1.07833	-1.3343		-0.1968	-1.3343		-0.46303	-1.3343
-1.58368	-0.24486		-0.42946	-0.24486		-0.39774	-0.24486
-0.88681	-0.25513		-0.88289	-0.25513		-0.21761	-0.25513
-0.53321	-0.7372		-0.50955	-0.7372		-0.37025	-0.7372
-0.41028	-0.57925		-0.36325	-0.57925		-0.54475	-0.57925
-0.90559	-0.59849		-0.35305	-0.59849		-0.55526	-0.59849
-1.24629	-0.00135		-0.43869	-0.00135		-0.2263	-0.00135
-1.05087	-0.18017		-0.79219	-0.18017		-0.58813	-0.18017
-1.28238	-0.44906		-0.4958	-0.44906		-0.38853	-0.44906
-0.85976	0.020464		-0.26116	0.020464		-0.25768	0.020464
-0.68437	-0.46209		-0.33722	-0.46209		-0.39968	-0.46209
-0.85526	-0.17659		-0.66822	-0.17659		-0.77346	-0.17659
-0.65539	-0.15033		-0.21457	-0.15033		-0.06864	-0.15033
-0.62057	-0.50388		-0.27256	-0.50388		-0.39866	-0.50388
-0.75026	-0.6543		-0.33845	-0.6543		-0.62012	-0.6543
-1.09132	-0.36669		-0.41495	-0.36669		-0.5127	-0.36669
-1.52826	-0.63266		-0.63694	-0.63266		-0.37702	-0.63266
-0.44655	-0.04635		-0.30942	-0.04635		-0.13156	-0.04635
-1.00987	-0.51049		-0.40185	-0.51049		-0.29341	-0.51049
-0.4018	-0.28648		-0.50733	-0.28648		-0.26636	-0.28648
-0.89076	-0.18747		-0.34959	-0.18747		-0.36501	-0.18747
-1.27695	-0.07346		-0.2834	-0.07346		-0.59326	-0.07346
-1.09081	-0.46467		-0.24395	-0.46467		-0.42439	-0.46467
-0.67381	-0.1279		-0.15719	-0.1279		-0.17257	-0.1279
-0.71203	-0.28845		-0.38796	-0.28845		-0.11321	-0.28845
-1.38086	-0.50989		-0.43475	-0.50989		-0.3886	-0.50989
-1.01437	-0.69514		-0.44415	-0.69514		-0.33079	-0.69514
-1.02063	-0.1797		-0.87872	-0.1797		-0.70653	-0.1797
-0.80254	-0.18991		-0.11704	-0.18991		-0.51953	-0.18991
-1.37408	-0.55571		-0.31676	-0.55571		-0.24457	-0.55571
-1.38016	-1.08879		-0.46498	-1.08879		-0.55376	-1.08879
-0.41563	0.017635		-0.60815	0.017635		0.047603	0.017635
-0.77128	-0.04175		-0.38641	-0.04175		-0.07482	-0.04175
-0.49606	-0.24647		-0.23516	-0.24647		-0.53387	-0.24647
-0.9994	-0.2578		-0.38275	-0.2578		-0.52433	-0.2578
-0.56229	-0.34122		0.125311	-0.34122		-0.1422	-0.34122
-0.48122	-0.22121		-0.44663	-0.22121		-0.21304	-0.22121
-1.2948	-0.69751		-0.4149	-0.69751		-0.35187	-0.69751
-0.62478	-0.35643		-0.19333	-0.35643		-0.2937	-0.35643
-0.89376	-1.13271		-0.32863	-1.13271		-0.6391	-1.13271
-0.57264	-0.38935		-0.50723	-0.38935		-0.12757	-0.38935
-1.29215	-0.17645		-0.32529	-0.17645		-0.17703	-0.17645
-0.89212	-0.30487		-0.32141	-0.30487		-0.8332	-0.30487
-0.97783	-0.50592		-0.41566	-0.50592		-0.33135	-0.50592
-1.01884	-0.99475		-0.41066	-0.99475		-0.66052	-0.99475
-0.79401	-0.10118		-0.51007	-0.10118		-0.57341	-0.10118
-1.00639	-0.93574		-0.42935	-0.93574		0.13349	-0.93574
-0.78505	-0.46828		-0.27651	-0.46828		-0.51177	-0.46828
-0.7877	-0.31169		-0.29786	-0.31169		-0.24249	-0.31169
-0.57441	-0.74331		-0.39795	-0.74331		-0.23115	-0.74331
-0.95719	-0.47359		-0.65336	-0.47359		-0.28375	-0.47359
-1.08061	-0.71712		-0.46161	-0.71712		-0.48754	-0.71712
-0.97161	-0.01053		-0.53537	-0.01053		-0.52499	-0.01053
-0.75337	0.019035		-0.47017	0.019035		-0.01637	0.019035
-0.67045	-0.13551		-0.56476	-0.13551		-0.31698	-0.13551
-0.85571	-0.06679		-0.36366	-0.06679		-0.46912	-0.06679
-1.17096	-0.08808		-0.44145	-0.08808		-0.3142	-0.08808
-0.92242	-0.03103		-0.18918	-0.03103		-0.02994	-0.03103
-1.49788	-0.56629		-0.53725	-0.56629		-0.25111	-0.56629
-0.41732	-0.2787		-0.56446	-0.2787		-0.50827	-0.2787
-0.95971	-0.22799		-0.53315	-0.22799		-0.31041	-0.22799
-1.06599	-0.30371		-0.65648	-0.30371		-0.3097	-0.30371
-1.14393	-0.16734		-0.49988	-0.16734		-0.01456	-0.16734
-0.91084	-0.36747		-0.2106	-0.36747		-0.35912	-0.36747
-0.91129	-0.21898		-0.33403	-0.21898		-0.43061	-0.21898
-1.13015	-0.06485		-0.19146	-0.06485		-0.44143	-0.06485
-0.99583	-0.22075		-0.36995	-0.22075		-0.25251	-0.22075
-1.05646	-0.08049		-0.50329	-0.08049		0.243076	-0.08049
-0.49243	-0.13898		-0.64371	-0.13898		-0.83389	-0.13898
-0.34726	-0.16254		-0.20421	-0.16254		-0.02673	-0.16254
-1.16289	-0.40523		-0.29301	-0.40523		-0.30253	-0.40523
-0.92066	-0.16546		-0.57115	-0.16546		-0.34959	-0.16546
-0.44734	-0.05028		-0.32881	-0.05028		-0.19471	-0.05028
-1.29469	-0.83994		-0.54912	-0.83994		-0.44944	-0.83994
-0.95533	-1.10239		-0.62312	-1.10239		-0.42797	-1.10239
-1.14073	-0.48179		-0.37037	-0.48179		-0.76279	-0.48179
-1.16573	-0.4101		-0.56424	-0.4101		-0.56433	-0.4101
-1.21048	-0.8281		-0.36323	-0.8281		-0.9579	-0.8281
-1.21758	-0.89147		-0.47159	-0.89147		-0.69092	-0.89147
-0.45087	-0.05323		-0.39924	-0.05323		-0.04381	-0.05323
-0.64391	-0.22051		-0.5411	-0.22051		-0.09842	-0.22051
-1.17728	-0.07871		-0.56558	-0.07871		-0.5256	-0.07871
-1.20339	-0.10556		-0.05058	-0.10556		-0.36038	-0.10556
-0.48494	-0.10715		-0.34316	-0.10715		-0.58198	-0.10715
-0.87029	-0.8443		-0.42912	-0.8443		-0.42307	-0.8443
-1.06455	-0.1926		-0.50008	-0.1926		-0.51445	-0.1926
-0.96872	-0.58964		-0.39577	-0.58964		-0.36162	-0.58964
-0.6231	-0.34227		-0.19686	-0.34227		-0.2192	-0.34227
-1.14402	-1.01212		-0.26063	-1.01212		-0.28014	-1.01212
-0.88662	-0.11811		-0.62653	-0.11811		-0.28867	-0.11811
-1.37641	-0.18657		-0.50092	-0.18657		-0.78643	-0.18657
-0.96104	-0.27381		-0.62857	-0.27381		-0.53677	-0.27381
-1.01614	-0.22998		-0.37458	-0.22998		-0.58228	-0.22998
-1.11225	-0.08669		-0.48086	-0.08669		-0.44709	-0.08669
-0.46672	-0.4675		-0.02968	-0.4675		-0.1133	-0.4675
-0.88124	0.010877		-0.21086	0.010877		0.023327	0.010877
-0.86432	-0.24359		-0.49722	-0.24359		-0.84023	-0.24359
-0.83035	-0.10698		-0.30503	-0.10698		-0.38223	-0.10698
-0.90161	-0.02233		-0.48749	-0.02233		-0.38418	-0.02233
-0.70741	-0.22232		-0.3356	-0.22232		-0.33395	-0.22232
-1.0166	-0.12863		-0.54865	-0.12863		-0.36732	-0.12863
-0.51033	-0.15809		-0.4046	-0.15809		-0.1926	-0.15809
-0.51267	-0.20757		-0.28524	-0.20757		-0.07801	-0.20757
-0.78254	-0.49603		-0.64569	-0.49603		-0.54825	-0.49603
-1.31946	-0.55992		-0.40418	-0.55992		-0.27633	-0.55992
-0.48899	-0.42563		-0.41517	-0.42563		-0.3303	-0.42563
-1.03014	-0.38516		-0.42559	-0.38516		-0.67737	-0.38516
-1.30961	-1.18342		-0.63944	-1.18342		-0.36648	-1.18342
-1.12702	-0.2783		-0.25486	-0.2783		-0.17673	-0.2783
-1.13433	-0.48015		-0.31826	-0.48015		-0.49194	-0.48015
-1.2188	-1.0119		-0.36277	-1.0119		-0.75205	-1.0119
-0.87439	-0.12536		-0.43805	-0.12536		-0.16856	-0.12536
-0.51301	-0.08108		-0.33951	-0.08108		-0.44987	-0.08108
-1.03882	-0.0149		-0.12558	-0.0149		-0.31973	-0.0149
-0.3476	-0.06544		-0.44532	-0.06544		0.167037	-0.06544
-0.79672	-0.36572		-0.43476	-0.36572		-0.34886	-0.36572
-0.80593	-0.17337		-0.32474	-0.17337		-0.30634	-0.17337
-1.3776	-0.12166		-0.15843	-0.12166		-0.42258	-0.12166
-1.08602	-0.00066		-0.29609	-0.00066		-0.40353	-0.00066
-0.84371	-0.38111		-0.45801	-0.38111		-0.16411	-0.38111
-1.00951	-0.16094		-0.38222	-0.16094		-0.12776	-0.16094
-1.09968	0.010505		-0.32819	0.010505		-0.17746	0.010505
-1.15624	-0.48293		-0.39996	-0.48293		-0.77985	-0.48293
-1.18066	-0.18252		-0.28178	-0.18252		-0.10031	-0.18252
-0.39351	-0.57354		-0.0131	-0.57354		-0.22467	-0.57354
-0.66074	-0.21669		-0.36035	-0.21669		-0.4578	-0.21669
-0.51515	-0.29154		-0.31709	-0.29154		-0.1993	-0.29154
-0.77005	-0.35842		-0.31617	-0.35842		-0.15333	-0.35842
-1.03286	-1.34899		-0.41712	-1.34899		-0.404	-1.34899
-0.6851	-0.98233		-0.93031	-0.98233		-0.44125	-0.98233
-1.44894	-0.34921		-0.64593	-0.34921		-1.68033	-0.34921
-0.73823	-0.12349		-0.3768	-0.12349		0.057493	-0.12349
-0.78861	-0.26997		-0.50903	-0.26997		-0.04625	-0.26997
-0.92777	-0.4547		-0.50167	-0.4547		-0.37766	-0.4547
-0.56347	-0.3776		-0.42673	-0.3776		-0.2272	-0.3776
-1.10973	-0.17281		-0.47873	-0.17281		-0.47857	-0.17281
-0.81035	-0.51333		-0.12963	-0.51333		-0.23566	-0.51333
-1.05472	-0.32398		-0.17407	-0.32398		-0.23535	-0.32398
-1.03474	-0.32683		-0.52274	-0.32683		-0.22715	-0.32683
-1.53094	-0.36183		-0.42149	-0.36183		-0.58333	-0.36183
-0.37111	0.013186		-0.62003	0.013186		-0.17941	0.013186
-1.1625	0.03738		-0.48142	0.03738		-0.89214	0.03738
-0.96445	-0.54629		-0.74437	-0.54629		-0.22126	-0.54629
-1.01159	-0.33356		-0.65412	-0.33356		-0.16677	-0.33356
-0.54074	-0.10443		-0.48226	-0.10443		-0.32651	-0.10443
-0.9322	-0.12397		-0.42764	-0.12397		-0.13252	-0.12397
-1.20982	-0.44819		-0.30949	-0.44819		-0.37261	-0.44819
-1.20351	0.047789		-0.33584	0.047789		-0.47689	0.047789
-1.17373	-0.23226		-0.59268	-0.23226		-0.48021	-0.23226
-0.76679	-0.65449		-0.25925	-0.65449		-0.21201	-0.65449
-0.95292	-0.08133		-0.3106	-0.08133		-0.29167	-0.08133
-0.62197	0.036582		-0.27723	0.036582		-0.48068	0.036582
-1.29265	-0.94478		-0.52182	-0.94478		-0.35403	-0.94478
-1.09353	-0.48028		-0.30116	-0.48028		-0.61485	-0.48028
-0.9678	-0.15711		-0.3246	-0.15711		-0.20345	-0.15711
-1.10488	-0.58643		-0.36692	-0.58643		-0.41208	-0.58643
-1.41606	-0.1938		-0.37371	-0.1938		-0.42203	-0.1938
-1.23317	-0.9367		-0.55927	-0.9367		-0.39539	-0.9367
-0.84405	-0.27881		-0.42491	-0.27881		-0.5021	-0.27881
-1.02293	-0.26084		-0.86554	-0.26084		-1.06363	-0.26084
-0.87979	-0.40916		-0.31336	-0.40916		-0.34673	-0.40916
-0.7602	-0.19224		-0.37692	-0.19224		-0.27446	-0.19224
-1.14865	-0.10576		-0.34241	-0.10576		-0.50106	-0.10576
-0.94518	-0.16179		-0.38539	-0.16179		0.077225	-0.16179
-1.01463	-0.17276		-0.56948	-0.17276		-0.76673	-0.17276
-0.57173	-0.40965		-0.44966	-0.40965		-0.36063	-0.40965
-0.94417	-0.09146		-0.34275	-0.09146		-0.22083	-0.09146
-0.88678	-0.06192		-0.35783	-0.06192		0.045612	-0.06192
-0.69643	-0.69689		-0.43518	-0.69689		-0.29771	-0.69689
-0.84231	-0.14708		-0.26591	-0.14708		-0.35218	-0.14708
-1.18423	-0.9323		-0.5951	-0.9323		-0.46498	-0.9323
-1.3061	-0.73281		-0.35737	-0.73281		-0.65912	-0.73281
-1.05119	-0.03443		-0.43821	-0.03443		-0.34662	-0.03443
-1.29792	-0.11126		-0.27893	-0.11126		-0.22734	-0.11126
-0.80946	-0.0835		-0.02647	-0.0835		-0.23774	-0.0835
-0.29394	-0.16211		-0.27481	-0.16211		-0.02071	-0.16211
-0.16075	-0.00338		-0.2989	-0.00338		-0.23177	-0.00338
-1.12857	0.050433		-0.91775	0.050433		-0.22391	0.050433
-1.21559	-0.39166		-0.70585	-0.39166		-0.39107	-0.39166
-1.02008	-0.62884		-0.70593	-0.62884		-0.38371	-0.62884
-0.9957	-0.11956		-0.20148	-0.11956		-0.52765	-0.11956
-0.79934	-0.18016		-0.46274	-0.18016		-0.23154	-0.18016
-1.35513	-0.54819		-0.40627	-0.54819		-0.62074	-0.54819
-0.51066	-0.56053		-0.34662	-0.56053		-0.09655	-0.56053
-0.97406	-0.28338		-0.48641	-0.28338		-0.17103	-0.28338
-0.32965	-0.32172		-0.57409	-0.32172		-0.42917	-0.32172
-0.6794	-0.27425		-0.23814	-0.27425		-0.4156	-0.27425
-0.71909	-0.24692		-0.28502	-0.24692		-0.27144	-0.24692
-0.96276	-0.11074		-0.49185	-0.11074		-0.18675	-0.11074
-0.90629	-0.66374		-0.37239	-0.66374		-0.30732	-0.66374
-0.86733	-0.22165		-0.1523	-0.22165		-0.47317	-0.22165
-0.10698	-0.92736		-0.35037	-0.92736		-0.30401	-0.92736
-1.0689	-0.5266		-0.73845	-0.5266		-0.55297	-0.5266
-0.5498	-0.30063		-0.20709	-0.30063		-0.20502	-0.30063
-0.73468	-0.04891		-0.45405	-0.04891		-0.44713	-0.04891
-0.57886	0.038008		-0.29881	0.038008		-0.4409	0.038008
-1.08799	-0.35078		-0.4195	-0.35078		-0.62481	-0.35078
-0.51767	-0.00463		-0.24258	-0.00463		0.095577	-0.00463
-1.03656	-0.04499		-0.4457	-0.04499		-0.15437	-0.04499
-1.16414	-0.12474		-0.67081	-0.12474		-0.64973	-0.12474
-0.45976	-0.22465		-0.30324	-0.22465		-0.7745	-0.22465
-0.92273	0.10106		0.100221	0.10106		-0.26686	0.10106
-0.94778	-0.13135		-0.39682	-0.13135		-0.38418	-0.13135
-0.68622	-0.21986		-0.52568	-0.21986		-0.22394	-0.21986
-1.13966	-0.81126		-0.56948	-0.81126		-0.40787	-0.81126
-0.79899	-0.15867		-0.42799	-0.15867		-0.11139	-0.15867
-1.3106	-0.9234		-0.4869	-0.9234		-1.02763	-0.9234
-1.0242	-0.17397		-0.08006	-0.17397		-0.22016	-0.17397
-0.78615	-0.35513		-0.6927	-0.35513		-0.32216	-0.35513
-0.82037	-0.24896		-0.21823	-0.24896		-0.33575	-0.24896
-0.84434	-0.09277		-0.67592	-0.09277		-0.2405	-0.09277
-0.91101	-0.14614		-0.44644	-0.14614		-0.3367	-0.14614
-0.57403	-0.71196		-0.26556	-0.71196		-0.37989	-0.71196
-0.70387	-0.21363		-0.33251	-0.21363		-0.4626	-0.21363
-0.70677	-0.20603		-0.62737	-0.20603		-0.44462	-0.20603
-0.45902	-0.2441		-0.57521	-0.2441		-0.21666	-0.2441
-1.03762	-0.34275		-0.26687	-0.34275		-0.38717	-0.34275
-1.07162	-0.19475		-0.12501	-0.19475		-0.41435	-0.19475
-0.93456	-0.89214		-0.4098	-0.89214		-0.42216	-0.89214
-0.69862	-0.26244		-0.35817	-0.26244		-0.33966	-0.26244
-1.13261	-0.13513		-0.39051	-0.13513		-0.58325	-0.13513
-0.86723	-1.09228		-0.38273	-1.09228		-0.75983	-1.09228
-1.39877	-0.36987		-0.35688	-0.36987		-0.72128	-0.36987
-0.95849	-0.26424		-0.27731	-0.26424		-0.46105	-0.26424
-0.84766	-0.36436		-0.37396	-0.36436		-0.38286	-0.36436
-1.11085	-0.30108		-0.39615	-0.30108		-0.27308	-0.30108
-0.90424	-0.29359		-0.28945	-0.29359		-0.3302	-0.29359
-1.18203	-0.53672		-0.73602	-0.53672		-0.29276	-0.53672
-0.79313	-0.18673		-0.31062	-0.18673		-0.28539	-0.18673
-0.61822	-0.11118		-0.11473	-0.11118		-0.39757	-0.11118
-0.57804	-1.0893		-0.44047	-1.0893		-0.28866	-1.0893
-0.62658	-0.17753		-0.43602	-0.17753		-0.28906	-0.17753
-0.60342	-0.42626		-0.24657	-0.42626		-0.30188	-0.42626
-0.81209	-0.34471		-0.55784	-0.34471		-0.31524	-0.34471
-0.85523	-0.23413		-0.44074	-0.23413		-0.46344	-0.23413
-0.53208	-1.35996		-0.4242	-1.35996		-0.35434	-1.35996
-1.41406	-1.06907		-0.30354	-1.06907		-0.37066	-1.06907
-1.06909	-0.38788		-0.08667	-0.38788		-0.48864	-0.38788
-0.65023	-0.49369		-0.35619	-0.49369		-0.16596	-0.49369
-0.11937	0.105181		-0.15403	0.105181		-0.05812	0.105181
-0.83264	-0.69994		-0.05809	-0.69994		-0.26226	-0.69994
-1.09001	-1.04806		-0.23689	-1.04806		-0.42518	-1.04806
-0.64599	-0.2826		-0.26578	-0.2826		-0.38192	-0.2826
-0.90567	-0.23385		-0.35731	-0.23385		-0.33469	-0.23385
-0.63999	-0.13097		-0.64827	-0.13097		-0.15925	-0.13097
-0.76479	-0.24641		-0.24465	-0.24641		-0.24419	-0.24641
-0.65437	-0.08852		-0.46645	-0.08852		-0.10118	-0.08852
-0.84395	-0.08491		-0.20358	-0.08491		-0.43018	-0.08491
-0.74868	-0.10653		-0.65433	-0.10653		-0.06744	-0.10653
-0.83965	-0.08992		-0.53424	-0.08992		-0.25334	-0.08992
-0.5685	-0.0172		-0.25351	-0.0172		-0.26803	-0.0172
-0.68934	-0.12046		-0.23075	-0.12046		-0.39527	-0.12046
-0.86212	-0.0762		-0.43988	-0.0762		-0.38881	-0.0762
-1.07441	-0.72516		-0.38612	-0.72516		-0.38506	-0.72516
-0.64206	-0.18533		-0.41624	-0.18533		-0.41052	-0.18533
-0.98085	-0.27954		-0.20133	-0.27954		-0.37524	-0.27954
-0.47289	-0.14652		-0.51665	-0.14652		-0.27733	-0.14652
-0.67282	-0.40401		-0.70105	-0.40401		-0.24991	-0.40401
-0.81173	-0.25815		-0.18277	-0.25815		-0.73961	-0.25815
-0.44629	-0.37092		-0.27785	-0.37092		-0.14426	-0.37092
-0.69549	-0.23791		-0.25595	-0.23791		-0.23328	-0.23791
-0.9747	-0.08427		-0.11655	-0.08427		-0.07613	-0.08427
-0.65275	-0.60745		-0.39411	-0.60745		-0.05191	-0.60745
-0.29228	-0.14177		-0.37664	-0.14177		-0.19688	-0.14177
-0.59547	-0.18998		-0.44974	-0.18998		-0.15199	-0.18998
-0.39274	-0.07478		-0.26574	-0.07478		-0.14552	-0.07478
-1.28218	-0.51817		-0.32336	-0.51817		-0.29142	-0.51817
-1.02341	-0.45883		-0.67023	-0.45883		-0.70124	-0.45883
-1.32194	-0.36225		-0.45475	-0.36225		-0.41358	-0.36225
-1.37006	-0.79351		-0.59842	-0.79351		-0.43519	-0.79351
-0.9461	-0.23403		-0.55644	-0.23403		-1.01167	-0.23403
-0.68985	-0.29268		-0.51971	-0.29268		-0.19147	-0.29268
-1.00138	-0.5188		-0.49194	-0.5188		-0.80704	-0.5188
-0.43452	-0.20564		-0.16294	-0.20564		-0.39901	-0.20564
-0.57799	-0.11711		-0.58384	-0.11711		-0.14169	-0.11711
-1.01261	-0.31719		-0.36343	-0.31719		-0.67135	-0.31719
-0.86713	-0.08959		-0.21546	-0.08959		0.011247	-0.08959
-0.93942	-0.16832		-0.48293	-0.16832		-0.30825	-0.16832
-0.66585	-0.05988		-0.14382	-0.05988		-0.17763	-0.05988
-1.04908	-0.29467		-0.1583	-0.29467		-0.23331	-0.29467
